# Supplementary material
Source: publisher site journal article supplement (https://www.dovepress.com/article/342107)
Supplement: Supplementary file 1 [file get_supplementary_file.php]

## Supplementary Material

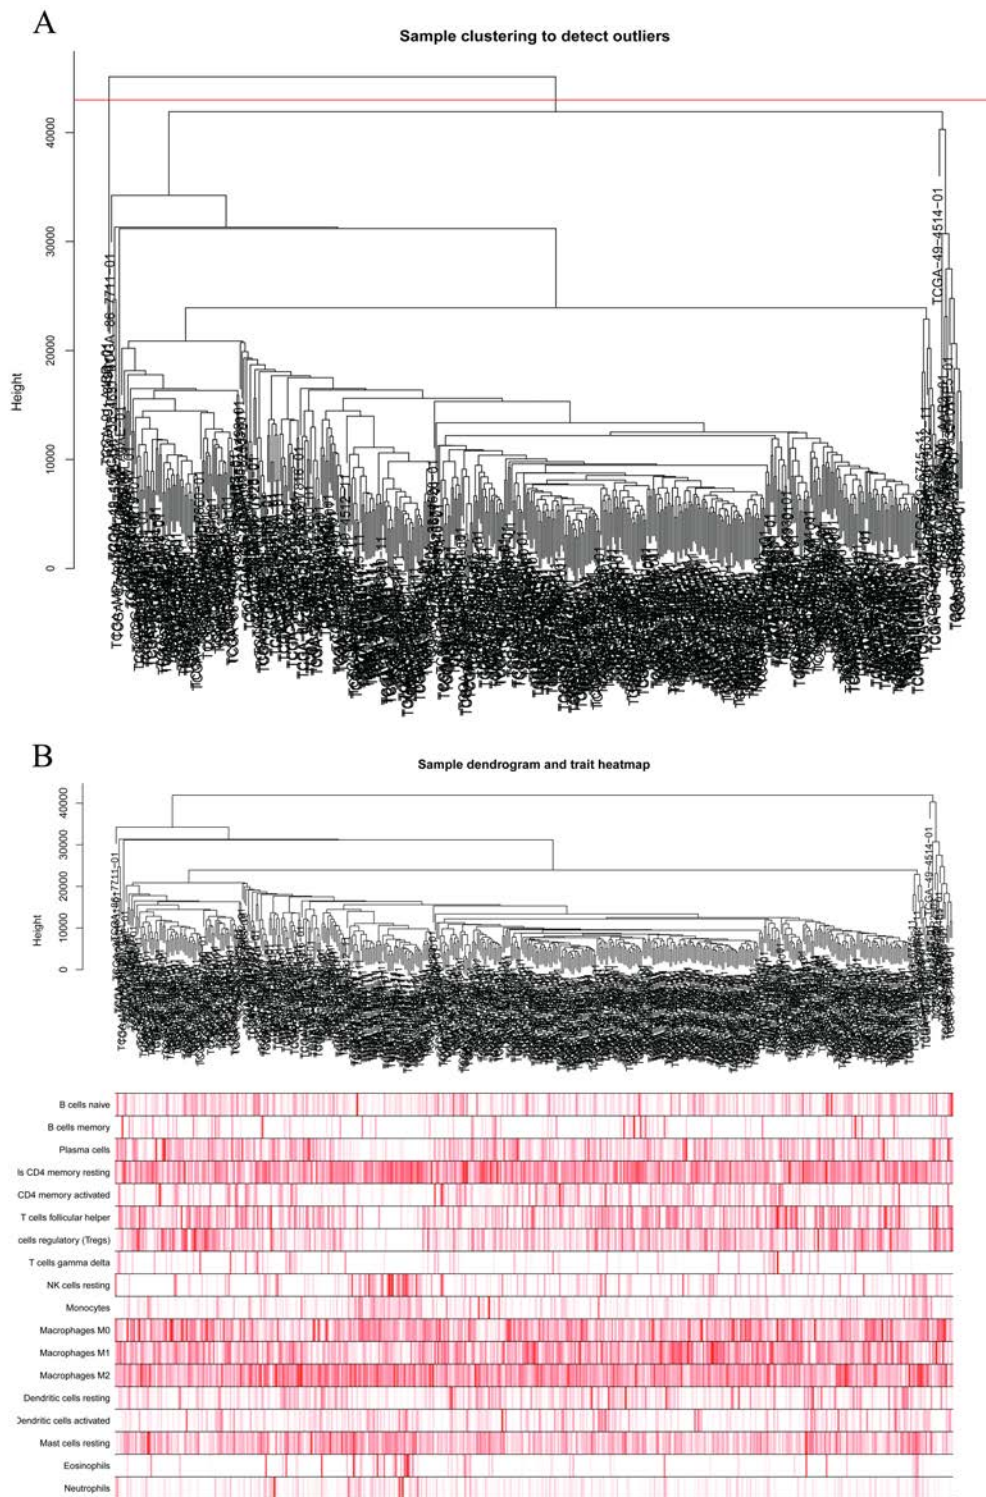

**Supplementary Figure 1.** Detection of abnormal samples. (A). Clustering dendrogram of 496 TCGA samples. (B). Clustering dendrogram of samples based on their Euclidean distance. The clustering was based on the TCGA-LUAD RNA-seq data. TCGA: the Cancer Genome Atlas; LUAD: lung adenocarcinoma.

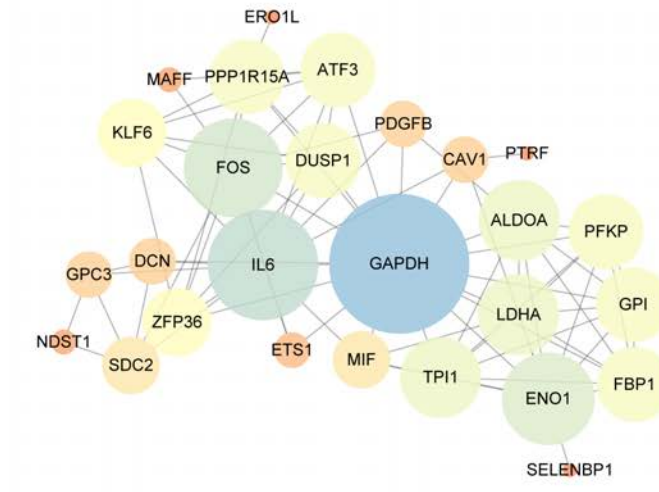

**Supplementary Figure 2.** PPI network of the 30 H&IIRGs. The PPI network of H&IIRGs was constructed using Cytoscape. The larger the circle, the more important the gene is in the PPI network. PPI: protein-protein interaction; H&IIRGs: hypoxia- and infiltrating immune cell-related genes.

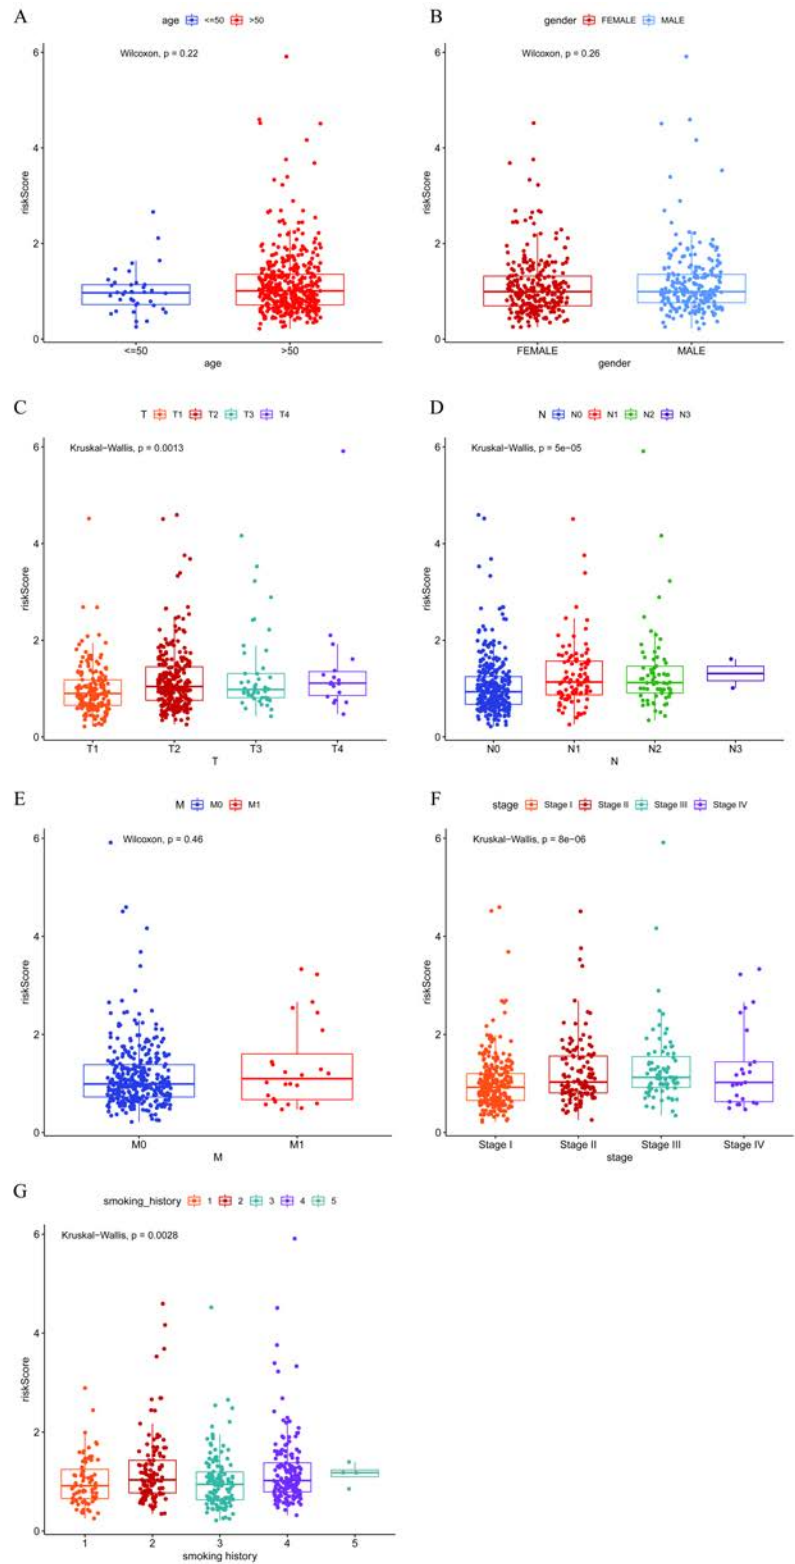

**Supplementary Figure 3.** Box plots showing the relationships between risk scores and clinical characteristics.

Supplementary Table 1. List of 200 hypoxia-related genes obtained from the MSigDB database

|          |        |        |         |        |        |        |          |          |         |
|----------|--------|--------|---------|--------|--------|--------|----------|----------|---------|
| ACKR3    | BNIP3L | CSRP2  | FAM162A | HDLBP  | KDM3A  | NDRG1  | PGM1     | S100A4   | TES     |
| ADM      | BRS3   | CXCR4  | FBP1    | HEXA   | KIF5A  | NDST1  | PGM2     | SAP30    | TGFB3   |
| ADORA2B  | BTG1   | DCN    | FOS     | HK1    | KLF6   | NDST2  | PHKG1    | SCARB1   | TGFBI   |
| AK4      | CA12   | DDIT3  | FOSL2   | HK2    | KLF7   | NEDD4L | PIM1     | SDC2     | TGM2    |
| AKAP12   | CASP6  | DDIT4  | FOXO3   | HMOX1  | KLHL24 | NFIL3  | PKLR     | SDC3     | TIPARP  |
| ALDOA    | CAV1   | DPYSL4 | GAA     | HOXB9  | LALBA  | NOCT   | PKP1     | SDC4     | TKTL1   |
| ALDOB    | CAVIN1 | DTNA   | GALK1   | HS3ST1 | LARGE1 | NR3C1  | PLAC8    | SELENBP1 | TMEM45A |
| ALDOC    | CAVIN3 | DUSP1  | GAPDH   | HSPA5  | LDHA   | P4HA1  | PLAUR    | SERPINE1 | TNFAIP3 |
| AMPD3    | CCN1   | EDN2   | GAPDHS  | IDS    | LDHC   | P4HA2  | PLIN2    | SIAH2    | TPBG    |
| ANGPTL4  | CCN2   | EFNA1  | GBE1    | IER3   | LOX    | PAM    | PNRC1    | SLC25A1  | TPD52   |
| ANKZF1   | CCN5   | EFNA3  | GCK     | IGFBP1 | LXN    | PCK1   | PPARGC1A | SLC2A1   | TPI1    |
| ANXA2    | CCNG2  | EGFR   | GCNT2   | IGFBP3 | MAFF   | PDGFB  | PPFIA4   | SLC2A3   | TPST2   |
| ATF3     | CDKN1A | ENO1   | GLRX    | IL6    | MAP3K1 | PDK1   | PPP1R15A | SLC2A5   | UGP2    |
| ATP7A    | CDKN1B | ENO2   | GPC1    | ILVBL  | MIF    | PDK3   | PPP1R3C  | SLC37A4  | VEGFA   |
| B3GALT6  | CDKN1C | ENO3   | GPC3    | INHA   | MT1E   | PFKFB3 | PRDX5    | SLC6A6   | VHL     |
| B4GALNT2 | CHST2  | ERO1A  | GPC4    | IRS2   | MT2A   | PFKL   | PRKCA    | SRPX     | VLDLR   |
| BCAN     | CHST3  | ERRFI1 | GPI     | ISG20  | MXI1   | PFKP   | PYGM     | STBD1    | WSB1    |
| BCL2     | CITED2 | ETS1   | GRHPR   | JMJD6  | MYH9   | PGAM2  | RBPJ     | STC1     | XPNPEP1 |
| BGN      | COL5A1 | EXT1   | GYS1    | JUN    | NAGK   | PGF    | RORA     | STC2     | ZFP36   |
| BHLHE40  | CP     | F3     | HAS1    | KDELR3 | NCAN   | PGK1   | RRAGD    | SULT2B1  | ZNF292  |

Supplementary Table 2. Risk scores for tumor samples in the training set

| id       | futime   | fustat | FBP1     | LDHA     | MAFF     | PDGFB    | GPC3     | riskScore | risk |
|----------|----------|--------|----------|----------|----------|----------|----------|-----------|------|
| TCGA-50- | 3.528767 | 1      | 4.876352 | 7.336842 | 2.089679 | 2.693871 | 0.51802  | 1.463932  | high |
| TCGA-69- | 0.353425 | 0      | 4.782257 | 7.562368 | 3.024292 | 2.369239 | 4.211943 | 1.356427  | high |
| TCGA-73- | 3.257534 | 0      | 6.800206 | 6.003484 | 2.396301 | 3.361    | 3.953668 | 0.544844  | low  |
| TCGA-78- | 1.715068 | 1      | 5.777301 | 7.565209 | 2.921827 | 2.952801 | 2.506125 | 1.50019   | high |
| TCGA-95- | 1.515068 | 0      | 5.938112 | 7.387048 | 2.3767   | 3.235266 | 2.383434 | 1.294425  | high |
| TCGA-78- | 3.328767 | 1      | 6.365983 | 6.755566 | 2.348318 | 2.052785 | 1.308449 | 0.783937  | low  |
| TCGA-MP  | 0.841096 | 1      | 5.851654 | 6.170017 | 3.047475 | 2.765337 | 4.084634 | 0.674247  | low  |
| TCGA-55- | 0.512329 | 1      | 4.338993 | 7.611766 | 2.826457 | 2.319918 | 2.405394 | 1.642491  | high |
| TCGA-44- | 1.276712 | 0      | 6.493556 | 7.648423 | 2.212169 | 1.834624 | 2.079115 | 1.012167  | high |
| TCGA-97- | 1.479452 | 0      | 5.962941 | 6.654964 | 3.449632 | 3.138677 | 3.366203 | 1.030187  | high |
| TCGA-67- | 1.169863 | 0      | 5.58228  | 7.426379 | 2.369446 | 2.111454 | 2.565137 | 1.089542  | high |
| TCGA-50- | 0.920548 | 1      | 7.287102 | 6.843853 | 2.321151 | 2.546231 | 2.62632  | 0.701467  | low  |
| TCGA-73- | 1.947945 | 1      | 5.53714  | 7.005483 | 2.500774 | 3.115248 | 3.958608 | 1.006102  | high |
| TCGA-38- | 2.939726 | 1      | 3.322861 | 6.891799 | 2.185399 | 3.792317 | 3.514695 | 1.463652  | high |
| TCGA-78- | 3.279452 | 1      | 6.320074 | 6.216527 | 4.175327 | 2.752709 | 2.58976  | 0.915779  | low  |
| TCGA-J2- | 1.506849 | 1      | 5.325744 | 6.915489 | 2.946523 | 3.111456 | 3.324474 | 1.147983  | high |
| TCGA-44- | 5.106849 | 0      | 5.667546 | 6.823854 | 2.559117 | 3.507559 | 4.843292 | 0.921402  | low  |
| TCGA-38- | 0.364384 | 0      | 6.202171 | 6.981085 | 3.581192 | 3.750969 | 3.746715 | 1.298926  | high |
| TCGA-50- | 2.128767 | 1      | 4.568198 | 7.571607 | 2.852658 | 3.03059  | 1.331865 | 1.98173   | high |
| TCGA-44- | 1.931507 | 0      | 6.686418 | 6.914122 | 2.511573 | 2.014196 | 2.758365 | 0.729429  | low  |
| TCGA-95- | 0.230137 | 0      | 6.812571 | 7.823423 | 2.109828 | 2.188859 | 1.281837 | 1.179775  | high |
| TCGA-44- | 3.915068 | 0      | 7.270885 | 7.351618 | 2.382765 | 2.646971 | 2.672322 | 0.913781  | low  |
| TCGA-50- | 5.013699 | 1      | 5.361662 | 6.320851 | 2.78477  | 3.029805 | 2.294143 | 0.903754  | low  |
| TCGA-75- | 3.652055 | 0      | 5.755454 | 8.248012 | 2.564142 | 2.030779 | 5.8643   | 1.196431  | high |
| TCGA-86- | 2.586301 | 0      | 5.345802 | 7.03103  | 2.195638 | 1.862938 | 1.685274 | 0.931116  | low  |
| TCGA-05- | 0.331507 | 1      | 5.312753 | 8.099419 | 3.310187 | 3.239823 | 2.15834  | 2.41794   | high |
| TCGA-4B- | 0.821918 | 1      | 7.142268 | 6.975853 | 4.065044 | 1.863911 | 0.910863 | 1.091599  | high |
| TCGA-86- | 3.169863 | 0      | 4.671402 | 7.193505 | 3.472537 | 2.288876 | 5.515762 | 1.120052  | high |
| TCGA-91- | 1.652055 | 0      | 6.404043 | 7.21704  | 1.901926 | 1.895838 | 2.377093 | 0.779521  | low  |
| TCGA-78- | 10.79452 | 0      | 5.557829 | 5.926994 | 1.847386 | 3.759903 | 2.250565 | 0.705287  | low  |
| TCGA-78- | 2.6      | 1      | 6.202418 | 6.197923 | 1.875668 | 2.157657 | 1.469169 | 0.568818  | low  |
| TCGA-49- | 1.336986 | 1      | 4.917358 | 7.585629 | 2.731818 | 3.702599 | 2.762373 | 1.873499  | high |
| TCGA-05- | 4.172603 | 0      | 5.918084 | 6.749955 | 1.594324 | 2.328876 | 3.259921 | 0.640711  | low  |
| TCGA-64- | 6.816438 | 0      | 4.992802 | 7.295534 | 2.016682 | 3.698679 | 3.349567 | 1.335008  | high |
| TCGA-69- | 0.553425 | 0      | 6.205446 | 7.359248 | 1.580792 | 1.536894 | 2.460112 | 0.741967  | low  |
| TCGA-05- | 1.671233 | 0      | 6.521937 | 6.405059 | 2.775615 | 2.485411 | 3.266837 | 0.655388  | low  |
| TCGA-55- | 5.854795 | 0      | 6.143663 | 7.296302 | 1.813672 | 2.651432 | 2.687141 | 0.933586  | low  |
| TCGA-05- | 1.835616 | 0      | 5.418646 | 7.300952 | 2.158697 | 1.228197 | 1.273276 | 0.945048  | low  |
| TCGA-55- | 1.931507 | 0      | 5.791547 | 7.055285 | 2.020928 | 2.999262 | 5.302456 | 0.785041  | low  |
| TCGA-97- | 0.049315 | 1      | 6.091187 | 6.581061 | 3.14872  | 1.358086 | 4.314575 | 0.594676  | low  |
| TCGA-75- | 7.09589  | 0      | 6.459245 | 6.298282 | 3.068148 | 2.417536 | 3.376603 | 0.652541  | low  |
| TCGA-05- | 0.750685 | 1      | 4.00243  | 9.434903 | 2.836641 | 1.843649 | 0.809694 | 4.164509  | high |
| TCGA-44- | 3.175342 | 0      | 6.347094 | 6.642516 | 1.878714 | 1.871768 | 3.473839 | 0.544139  | low  |
| TCGA-80- | 7.758904 | 0      | 6.101585 | 7.211035 | 3.243906 | 1.828622 | 4.681956 | 0.860818  | low  |
| TCGA-55- | 2.082192 | 1      | 5.63396  | 7.376013 | 4.65726  | 3.827105 | 2.069048 | 2.458331  | high |
| TCGA-99- | 0.120548 | 0      | 4.728166 | 6.870986 | 2.926116 | 2.909554 | 3.20931  | 1.183664  | high |
| TCGA-55- | 1.663014 | 1      | 5.475818 | 5.203917 | 3.735863 | 2.191994 | 3.368806 | 0.496758  | low  |
| TCGA-97- | 1.709589 | 0      | 8.051662 | 5.456613 | 2.644361 | 3.067068 | 3.760612 | 0.356844  | low  |
| TCGA-50- | 0.060274 | 1      | 5.131546 | 6.465677 | 3.190357 | 3.267174 | 5.367618 | 0.872867  | low  |
| TCGA-67- | 1.569863 | 0      | 5.355627 | 7.346572 | 2.407681 | 2.1222   | 3.997488 | 0.969183  | low  |
| TCGA-86- | 1.657534 | 0      | 5.139007 | 6.576879 | 1.768458 | 2.538717 | 4.677015 | 0.632771  | low  |
| TCGA-L9- | 1.819178 | 0      | 6.762633 | 7.176765 | 3.289676 | 3.461859 | 2.107821 | 1.343568  | high |
| TCGA-05- | 2        | 0      | 6.372305 | 6.168722 | 3.481141 | 2.231744 | 3.695113 | 0.634148  | low  |
| TCGA-91- | 0.120548 | 0      | 5.129187 | 6.726935 | 1.824143 | 3.219854 | 4.608092 | 0.791243  | low  |

|          |          |   |          |          |          |          |          |          |      |
|----------|----------|---|----------|----------|----------|----------|----------|----------|------|
| TCGA-91- | 3.446575 | 1 | 4.464259 | 6.89516  | 1.684549 | 2.918275 | 5.081593 | 0.826727 | low  |
| TCGA-44- | 1.369863 | 1 | 3.679349 | 8.46539  | 3.281704 | 2.686499 | 0.351988 | 3.757557 | high |
| TCGA-05- | 2.084932 | 0 | 5.589521 | 6.853248 | 2.185867 | 2.776384 | 5.316367 | 0.727182 | low  |
| TCGA-05- | 3.920548 | 0 | 6.52091  | 7.769334 | 2.927041 | 3.0258   | 1.708244 | 1.611034 | high |
| TCGA-L4- | 1.583562 | 0 | 5.748732 | 6.172218 | 2.230406 | 2.500931 | 1.286519 | 0.700737 | low  |
| TCGA-53- | 2.857534 | 1 | 4.062342 | 7.612219 | 3.127387 | 3.599778 | 0.927006 | 2.660698 | high |
| TCGA-55- | 3.542466 | 1 | 5.754532 | 6.652428 | 1.863771 | 2.030877 | 3.86519  | 0.592247 | low  |
| TCGA-93- | 1.583562 | 0 | 6.25451  | 5.79055  | 2.889346 | 4.07995  | 5.990526 | 0.571838 | low  |
| TCGA-44- | 3.627397 | 0 | 5.574543 | 6.98932  | 2.609821 | 2.319562 | 3.139338 | 0.929113 | low  |
| TCGA-55- | 3.227397 | 0 | 4.325734 | 7.054744 | 3.691861 | 2.59285  | 3.73655  | 1.427818 | high |
| TCGA-50- | 4.038356 | 0 | 5.786677 | 7.399424 | 2.193846 | 2.613258 | 2.568774 | 1.114822 | high |
| TCGA-49- | 1.854795 | 0 | 5.656098 | 6.886922 | 2.201529 | 2.411973 | 0.451572 | 1.034917 | high |
| TCGA-78- | 2.167123 | 0 | 6.512467 | 5.690917 | 2.874862 | 1.587134 | 1.656549 | 0.462468 | low  |
| TCGA-55- | 1.786301 | 0 | 3.334299 | 7.658972 | 3.943577 | 5.063962 | 1.536564 | 4.519451 | high |
| TCGA-78- | 8.682192 | 1 | 6.052557 | 6.042728 | 1.779269 | 4.269159 | 4.414816 | 0.628685 | low  |
| TCGA-55- | 0.649315 | 1 | 6.335062 | 6.954669 | 2.439282 | 3.756895 | 2.340635 | 1.130529 | high |
| TCGA-86- | 2.569863 | 0 | 6.71162  | 6.350115 | 2.830873 | 2.30502  | 3.750485 | 0.581984 | low  |
| TCGA-44- | 2.838356 | 0 | 6.321784 | 7.755533 | 2.229741 | 2.708502 | 4.262058 | 1.080095 | high |
| TCGA-75- | 4.153425 | 1 | 5.982295 | 8.161973 | 2.30465  | 2.75808  | 2.775331 | 1.59182  | high |
| TCGA-44- | 2.334247 | 0 | 4.172002 | 5.773093 | 1.23776  | 1.238721 | 3.868226 | 0.373204 | low  |
| TCGA-44- | 3.09589  | 0 | 5.897617 | 7.607121 | 2.972355 | 2.574168 | 1.540704 | 1.529355 | high |
| TCGA-50- | 3.082192 | 0 | 5.963412 | 6.39044  | 3.009475 | 2.666982 | 4.43507  | 0.693462 | low  |
| TCGA-49- | 3.367123 | 1 | 4.81864  | 6.923667 | 2.567869 | 2.863669 | 0.953807 | 1.339016 | high |
| TCGA-49- | 2.342466 | 1 | 5.322194 | 6.91868  | 2.404899 | 3.14848  | 3.400614 | 1.032644 | high |
| TCGA-44- | 1.80274  | 0 | 4.844608 | 6.541975 | 2.281581 | 3.270367 | 3.676148 | 0.9078   | low  |
| TCGA-L9- | 0.158904 | 1 | 3.818759 | 7.933744 | 3.602912 | 2.921615 | 0.348343 | 3.225203 | high |
| TCGA-69- | 1.167123 | 0 | 5.309468 | 7.858916 | 2.761304 | 2.328049 | 2.629174 | 1.553053 | high |
| TCGA-L9- | 1.547945 | 0 | 5.936056 | 4.733354 | 2.365119 | 2.219569 | 4.598468 | 0.257431 | low  |
| TCGA-97- | 1.493151 | 0 | 6.676909 | 6.100824 | 2.430994 | 2.602944 | 5.192522 | 0.451456 | low  |
| TCGA-86- | 1.136986 | 0 | 5.962794 | 6.409896 | 2.579289 | 3.839623 | 5.096784 | 0.766496 | low  |
| TCGA-55- | 2.726027 | 1 | 5.403044 | 6.589871 | 2.561016 | 3.30224  | 3.086113 | 0.959128 | low  |
| TCGA-NJ- | 0.010959 | 1 | 7.694432 | 5.971472 | 1.575532 | 1.477937 | 1.302041 | 0.345149 | low  |
| TCGA-44- | 2.084932 | 1 | 5.081613 | 7.463844 | 2.742729 | 3.618391 | 1.504221 | 1.899077 | high |
| TCGA-55- | 1.027397 | 1 | 5.224956 | 7.979015 | 3.280101 | 3.202272 | 3.232615 | 2.084628 | high |
| TCGA-55- | 1.928767 | 0 | 8.062231 | 6.506414 | 3.635186 | 2.457789 | 1.561347 | 0.753128 | low  |
| TCGA-62- | 6.024658 | 0 | 5.74612  | 7.404048 | 1.827097 | 2.025847 | 0.89977  | 1.071053 | high |
| TCGA-55- | 1.726027 | 0 | 5.242945 | 7.268451 | 2.23514  | 2.957969 | 2.524964 | 1.230256 | high |
| TCGA-71- | 0.70137  | 0 | 8.628896 | 6.277428 | 2.387206 | 2.307074 | 0.868061 | 0.500925 | low  |
| TCGA-55- | 6.709589 | 0 | 5.054499 | 7.261602 | 2.240058 | 2.916693 | 1.81821  | 1.328881 | high |
| TCGA-78- | 5.408219 | 0 | 5.086231 | 7.319707 | 2.444897 | 3.024237 | 3.261553 | 1.278286 | high |
| TCGA-55- | 3.835616 | 0 | 5.629557 | 7.288887 | 2.325459 | 2.609263 | 3.463293 | 1.02983  | high |
| TCGA-50- | 6.556164 | 1 | 7.337901 | 7.59128  | 2.56983  | 3.037995 | 1.204463 | 1.286313 | high |
| TCGA-95- | 1.783562 | 0 | 6.200897 | 7.349212 | 3.367884 | 3.578191 | 2.365541 | 1.603186 | high |
| TCGA-64- | 2.367123 | 0 | 4.146298 | 7.043579 | 3.669265 | 2.953988 | 6.006579 | 1.283909 | high |
| TCGA-44- | 0.961644 | 0 | 6.196662 | 7.102412 | 2.454415 | 2.593107 | 2.914728 | 0.934262 | low  |
| TCGA-97- | 1.191781 | 0 | 6.244225 | 6.017889 | 2.54678  | 3.812892 | 3.922459 | 0.671752 | low  |
| TCGA-78- | 3.208219 | 1 | 2.17886  | 6.808859 | 0.633503 | 1.578852 | 7.740296 | 0.544115 | low  |
| TCGA-49- | 1.172603 | 1 | 5.638862 | 7.649667 | 2.960307 | 2.940299 | 2.747434 | 1.566495 | high |
| TCGA-97- | 1.715068 | 0 | 6.89178  | 5.23493  | 2.269842 | 1.952652 | 4.951976 | 0.255144 | low  |
| TCGA-MP  | 0.928767 | 1 | 5.420642 | 6.896154 | 3.092727 | 2.721111 | 3.225784 | 1.0783   | high |
| TCGA-73- | 0.358904 | 0 | 3.712364 | 7.908257 | 3.447017 | 4.042159 | 2.253882 | 3.332659 | high |
| TCGA-55- | 0.076712 | 0 | 6.027373 | 8.003294 | 2.499296 | 3.744592 | 0.981494 | 2.17074  | high |
| TCGA-69- | 0.630137 | 0 | 4.656863 | 7.07407  | 2.50168  | 2.937605 | 3.422308 | 1.190527 | high |
| TCGA-50- | 3.383562 | 1 | 5.755108 | 6.525443 | 2.829039 | 2.308275 | 2.881961 | 0.779605 | low  |
| TCGA-05- | 2.084932 | 0 | 6.29874  | 6.574647 | 2.518367 | 3.297814 | 4.220163 | 0.753051 | low  |
| TCGA-49- | 6.350685 | 1 | 6.449108 | 6.641371 | 2.338973 | 1.764274 | 2.368867 | 0.632459 | low  |

|          |          |   |          |          |          |          |          |          |      |
|----------|----------|---|----------|----------|----------|----------|----------|----------|------|
| TCGA-78- | 9.208219 | 1 | 6.365684 | 5.977983 | 3.759812 | 4.05613  | 4.406908 | 0.832749 | low  |
| TCGA-95- | 2.273973 | 0 | 6.345995 | 6.087156 | 2.534589 | 2.700909 | 3.668466 | 0.558057 | low  |
| TCGA-MP  | 2.60274  | 1 | 4.829001 | 7.171124 | 3.295015 | 2.612233 | 1.19032  | 1.615746 | high |
| TCGA-55- | 0.665753 | 1 | 6.319528 | 6.416121 | 3.734352 | 3.354569 | 4.037131 | 0.915396 | low  |
| TCGA-69- | 1.134247 | 0 | 6.257683 | 6.827837 | 2.002642 | 2.270073 | 2.983872 | 0.694791 | low  |
| TCGA-44- | 1.120548 | 1 | 5.597986 | 6.66438  | 1.852355 | 2.505263 | 5.608124 | 0.575378 | low  |
| TCGA-49- | 2.736986 | 1 | 3.127944 | 7.825465 | 1.568766 | 1.193554 | 0.514008 | 1.572423 | high |
| TCGA-78- | 0.79726  | 1 | 4.956222 | 6.761127 | 3.649904 | 2.774253 | 2.476765 | 1.305288 | high |
| TCGA-49- | 1.854795 | 1 | 5.668335 | 7.103395 | 3.144106 | 2.662654 | 3.278254 | 1.13811  | high |
| TCGA-62- | 1.627397 | 1 | 5.484218 | 6.545525 | 2.444312 | 2.649404 | 1.977618 | 0.875807 | low  |
| TCGA-49- | 0.969863 | 0 | 6.330128 | 7.742238 | 2.275646 | 3.8015   | 1.879395 | 1.650687 | high |
| TCGA-44- | 2.810959 | 1 | 6.037201 | 7.518667 | 1.959488 | 2.333088 | 4.102325 | 0.898838 | low  |
| TCGA-69- | 1.126027 | 0 | 4.850989 | 6.067405 | 3.521625 | 2.927129 | 3.821117 | 0.862495 | low  |
| TCGA-93- | 1.454795 | 0 | 5.499271 | 6.735801 | 3.553813 | 2.708378 | 2.335355 | 1.169565 | high |
| TCGA-86- | 0.065753 | 0 | 5.427912 | 7.968944 | 3.060328 | 2.589153 | 3.396367 | 1.682578 | high |
| TCGA-MP  | 2.454795 | 1 | 5.615457 | 6.894466 | 2.593645 | 1.631739 | 1.734669 | 0.866486 | low  |
| TCGA-55- | 1.191781 | 0 | 6.419912 | 7.819611 | 2.587248 | 2.815827 | 3.905955 | 1.241291 | high |
| TCGA-49- | 5.186301 | 0 | 5.612765 | 6.127657 | 2.542877 | 3.079432 | 0.438834 | 0.899582 | low  |
| TCGA-38- | 3.717808 | 1 | 5.910349 | 6.993853 | 2.11376  | 2.399363 | 1.224164 | 0.961542 | low  |
| TCGA-62- | 4.528767 | 1 | 6.2699   | 6.288533 | 3.259295 | 2.943534 | 3.106994 | 0.788391 | low  |
| TCGA-99- | 1.79726  | 1 | 5.015731 | 8.50783  | 3.185033 | 2.034537 | 1.620171 | 2.444028 | high |
| TCGA-55- | 5.778082 | 0 | 5.980251 | 7.946208 | 2.924118 | 3.107751 | 5.313024 | 1.408893 | high |
| TCGA-91- | 1.189041 | 1 | 6.7165   | 5.80294  | 2.306423 | 2.686789 | 3.905125 | 0.433442 | low  |
| TCGA-64- | 3.084932 | 0 | 5.477544 | 6.772864 | 2.386423 | 1.305844 | 2.815985 | 0.684726 | low  |
| TCGA-86- | 2.731507 | 0 | 6.63435  | 6.822884 | 2.828434 | 2.343723 | 2.932113 | 0.790196 | low  |
| TCGA-55- | 0.131507 | 0 | 6.537254 | 6.276217 | 2.964027 | 2.18364  | 3.284088 | 0.601767 | low  |
| TCGA-86- | 0.339726 | 1 | 5.573697 | 7.388177 | 2.892587 | 3.19184  | 4.187746 | 1.285565 | high |
| TCGA-73- | 1.279452 | 0 | 5.388729 | 7.262398 | 3.032162 | 2.519277 | 2.73555  | 1.268631 | high |
| TCGA-55- | 2.726027 | 1 | 5.60453  | 7.610553 | 2.571083 | 2.456558 | 1.574296 | 1.435488 | high |
| TCGA-67- | 1.156164 | 0 | 5.869784 | 6.503506 | 2.117094 | 1.761182 | 5.753323 | 0.461392 | low  |
| TCGA-44- | 1.994521 | 0 | 5.648399 | 5.710361 | 4.272279 | 1.835416 | 2.759558 | 0.668465 | low  |
| TCGA-49- | 2.479452 | 1 | 7.847109 | 6.921058 | 2.370397 | 2.263279 | 2.173618 | 0.665544 | low  |
| TCGA-64- | 7.331507 | 0 | 4.45927  | 7.384523 | 3.338354 | 2.488674 | 2.572483 | 1.643138 | high |
| TCGA-97- | 1.367123 | 0 | 7.147705 | 7.594602 | 3.182357 | 2.728127 | 3.830509 | 1.123894 | high |
| TCGA-78- | 19.34795 | 0 | 5.689659 | 6.892452 | 2.219015 | 2.710334 | 2.546044 | 0.919238 | low  |
| TCGA-95- | 1.306849 | 0 | 6.36231  | 6.690715 | 3.284305 | 2.438355 | 2.63613  | 0.885562 | low  |
| TCGA-44- | 2.70411  | 1 | 6.4075   | 7.557028 | 2.260149 | 3.713742 | 3.094922 | 1.323397 | high |
| TCGA-55- | 1.282192 | 1 | 5.749684 | 6.682361 | 1.022962 | 2.925582 | 3.774666 | 0.611533 | low  |
| TCGA-49- | 2.408219 | 1 | 5.073644 | 6.910971 | 2.882498 | 2.733442 | 1.002561 | 1.326503 | high |
| TCGA-55- | 0.939726 | 1 | 5.299613 | 6.358099 | 3.16503  | 3.018144 | 1.952586 | 1.028481 | high |
| TCGA-86- | 1.216438 | 1 | 5.736751 | 6.94779  | 2.708781 | 2.054817 | 1.365879 | 1.003003 | high |
| TCGA-50- | 1.309589 | 1 | 7.527061 | 7.09142  | 2.741967 | 2.625006 | 2.404815 | 0.855629 | low  |
| TCGA-05- | 0.668493 | 1 | 5.764759 | 7.740291 | 2.268199 | 2.571053 | 3.617338 | 1.203621 | high |
| TCGA-50- | 3.065753 | 0 | 7.019249 | 6.772177 | 3.410939 | 3.811654 | 2.492688 | 1.143041 | high |
| TCGA-NJ- | 1.690411 | 0 | 6.445401 | 7.021345 | 3.101047 | 1.751887 | 1.796148 | 0.920094 | low  |
| TCGA-49- | 2.380822 | 1 | 5.908954 | 8.109727 | 2.353357 | 2.579892 | 2.380352 | 1.583091 | high |
| TCGA-64- | 2.372603 | 0 | 6.514419 | 7.879549 | 3.038484 | 3.362534 | 2.555194 | 1.725609 | high |
| TCGA-86- | 0.380822 | 0 | 5.37349  | 5.820064 | 2.985416 | 2.958017 | 2.611296 | 0.715737 | low  |
| TCGA-49- | 1.430137 | 0 | 6.650542 | 7.29722  | 2.411475 | 2.653413 | 2.679034 | 0.980369 | low  |
| TCGA-38- | 0.969863 | 1 | 3.798576 | 8.043163 | 2.930347 | 2.698703 | 2.870217 | 2.290453 | high |
| TCGA-38- | 10.06575 | 0 | 6.678997 | 6.244698 | 2.899192 | 4.329951 | 4.558847 | 0.789503 | low  |
| TCGA-44- | 2.315068 | 0 | 3.17866  | 6.266767 | 1.635252 | 2.484152 | 3.906801 | 0.747451 | low  |
| TCGA-55- | 2.608219 | 1 | 6.434431 | 7.537534 | 2.385129 | 2.527692 | 2.83879  | 1.080695 | high |
| TCGA-55- | 1.49589  | 0 | 5.386033 | 5.86804  | 2.706268 | 3.533251 | 4.420804 | 0.663443 | low  |
| TCGA-69- | 1.117808 | 0 | 5.690775 | 6.547177 | 2.878698 | 1.774782 | 2.254993 | 0.76139  | low  |
| TCGA-44- | 1.136986 | 0 | 5.060409 | 6.044419 | 2.804074 | 3.642193 | 1.830286 | 0.980862 | low  |

|          |          |   |          |          |          |          |          |          |      |
|----------|----------|---|----------|----------|----------|----------|----------|----------|------|
| TCGA-05- | 2.50137  | 0 | 5.928434 | 6.005114 | 2.543455 | 3.022255 | 4.079639 | 0.588327 | low  |
| TCGA-MN  | 0.230137 | 0 | 6.357876 | 6.93599  | 2.460916 | 2.939139 | 2.411106 | 0.947309 | low  |
| TCGA-99- | 3.063014 | 0 | 7.005667 | 6.784418 | 2.9793   | 3.194968 | 3.155157 | 0.882292 | low  |
| TCGA-75- | 6.487671 | 0 | 5.381934 | 6.943142 | 3.127205 | 2.442022 | 3.591458 | 1.022688 | high |
| TCGA-55- | 5.657534 | 0 | 6.049212 | 6.171057 | 2.317216 | 3.257978 | 1.569915 | 0.77499  | low  |
| TCGA-55- | 2.849315 | 0 | 5.256939 | 7.028248 | 2.374517 | 1.958183 | 2.118015 | 0.958825 | low  |
| TCGA-80- | 7.109589 | 0 | 7.374186 | 7.570502 | 2.381953 | 2.097689 | 2.280489 | 0.922597 | low  |
| TCGA-91- | 0.884932 | 0 | 5.799592 | 6.55083  | 3.200123 | 3.154523 | 3.034652 | 0.986799 | low  |
| TCGA-69- | 0.509589 | 0 | 5.31316  | 7.20992  | 2.812718 | 2.992753 | 1.307884 | 1.487878 | high |
| TCGA-91- | 0.09589  | 0 | 6.802404 | 7.104465 | 3.907311 | 2.062904 | 2.110515 | 1.106096 | high |
| TCGA-MP  | 2.030137 | 0 | 6.146829 | 6.111212 | 2.809106 | 2.021723 | 3.025849 | 0.566003 | low  |
| TCGA-44- | 1.572603 | 1 | 5.168835 | 7.765044 | 2.938573 | 3.349654 | 4.218836 | 1.683084 | high |
| TCGA-44- | 3.506849 | 0 | 5.802033 | 7.43944  | 2.294195 | 2.716895 | 1.080603 | 1.340664 | high |
| TCGA-73- | 4.194521 | 1 | 6.412675 | 6.724548 | 2.50802  | 1.902411 | 4.589274 | 0.580844 | low  |
| TCGA-55- | 1.205479 | 0 | 4.068    | 7.074542 | 2.315907 | 3.901113 | 1.652788 | 1.76046  | high |
| TCGA-86- | 2.29863  | 0 | 6.554367 | 6.345018 | 1.850018 | 3.147016 | 3.118177 | 0.60909  | low  |
| TCGA-95- | 1.30411  | 0 | 1.841754 | 6.228393 | 2.157161 | 2.55319  | 1.304524 | 1.251324 | high |
| TCGA-95- | 1.378082 | 1 | 3.910355 | 7.019822 | 1.05679  | 2.505425 | 1.906049 | 1.009936 | high |
| TCGA-50- | 1.709589 | 1 | 4.674579 | 8.167385 | 2.361026 | 2.714555 | 1.774133 | 2.102437 | high |
| TCGA-J2- | 2.706849 | 0 | 5.713903 | 6.527001 | 3.49411  | 2.381704 | 3.683216 | 0.849778 | low  |
| TCGA-86- | 2.936986 | 0 | 4.32645  | 7.582093 | 2.50689  | 2.588031 | 2.537549 | 1.587914 | high |
| TCGA-78- | 0.490411 | 1 | 5.996218 | 6.864884 | 2.274499 | 1.676489 | 0.716596 | 0.835745 | low  |
| TCGA-05- | 2.416438 | 0 | 4.851128 | 6.791533 | 2.992021 | 2.440238 | 3.111397 | 1.043277 | high |
| TCGA-91- | 0.849315 | 0 | 5.010029 | 7.498169 | 2.251266 | 1.983443 | 4.002545 | 1.028815 | high |
| TCGA-97- | 1.509589 | 0 | 6.033228 | 7.771007 | 3.016923 | 2.706366 | 1.775641 | 1.642173 | high |
| TCGA-86- | 0.052055 | 1 | 5.616564 | 7.802317 | 2.968915 | 2.719468 | 1.562053 | 1.78852  | high |
| TCGA-50- | 1.013699 | 1 | 6.880869 | 7.269473 | 1.739881 | 2.322398 | 0.705378 | 0.9071   | low  |
| TCGA-86- | 1.712329 | 1 | 5.307378 | 7.151272 | 1.596615 | 1.288921 | 2.135828 | 0.752768 | low  |
| TCGA-86- | 1.030137 | 1 | 6.067705 | 7.323069 | 2.994863 | 4.025598 | 3.335069 | 1.507531 | high |
| TCGA-55- | 1.638356 | 1 | 5.884013 | 7.753534 | 3.645214 | 3.252619 | 2.684088 | 1.947927 | high |
| TCGA-55- | 1.471233 | 0 | 5.660952 | 7.376686 | 1.454994 | 2.601872 | 2.138143 | 1.002527 | high |
| TCGA-55- | 1.145205 | 0 | 6.123248 | 6.496016 | 2.488373 | 2.688243 | 3.10457  | 0.721198 | low  |
| TCGA-93- | 0.509589 | 0 | 4.63715  | 7.040698 | 3.232297 | 2.738254 | 1.97817  | 1.480534 | high |
| TCGA-97- | 5.123288 | 0 | 7.413808 | 5.918441 | 2.877655 | 2.901035 | 4.780283 | 0.449208 | low  |
| TCGA-55- | 1.641096 | 0 | 6.51819  | 8.45663  | 2.27043  | 2.801428 | 2.33792  | 1.755692 | high |
| TCGA-05- | 3.084932 | 0 | 5.315499 | 7.819735 | 3.226824 | 1.99181  | 4.499273 | 1.333131 | high |
| TCGA-86- | 1.158904 | 0 | 5.073487 | 6.608469 | 1.774137 | 3.120849 | 3.230901 | 0.824862 | low  |
| TCGA-62- | 1.216438 | 1 | 4.606492 | 7.518659 | 3.428934 | 3.158703 | 1.465609 | 2.190095 | high |
| TCGA-55- | 2.167123 | 0 | 6.402278 | 5.458253 | 2.542268 | 3.076401 | 4.175673 | 0.428464 | low  |
| TCGA-83- | 2.257534 | 0 | 4.006784 | 6.590359 | 2.571743 | 2.770838 | 1.3731   | 1.222982 | high |
| TCGA-05- | 1        | 0 | 6.785655 | 6.605614 | 2.109526 | 1.822332 | 1.354046 | 0.624763 | low  |
| TCGA-50- | 5.956164 | 1 | 6.407593 | 7.247253 | 2.97697  | 3.046914 | 2.913393 | 1.17824  | high |
| TCGA-44- | 2.213699 | 1 | 3.710064 | 6.80387  | 1.91509  | 2.243118 | 2.677415 | 0.993167 | high |
| TCGA-91- | 1.142466 | 0 | 4.92891  | 6.380117 | 2.698006 | 2.112259 | 3.175468 | 0.749759 | low  |
| TCGA-55- | 0.323288 | 1 | 3.515277 | 7.96116  | 2.474833 | 5.205538 | 3.089802 | 3.393505 | high |
| TCGA-55- | 1.715068 | 0 | 5.919669 | 7.455272 | 2.712382 | 3.187627 | 2.012881 | 1.464769 | high |
| TCGA-93- | 1.871233 | 0 | 6.609214 | 6.578334 | 1.88666  | 2.384916 | 2.099539 | 0.635143 | low  |
| TCGA-MP  | 3.465753 | 1 | 5.524527 | 6.382082 | 3.059447 | 4.897413 | 3.367195 | 1.270941 | high |
| TCGA-49- | 0.712329 | 1 | 3.773466 | 7.750503 | 2.319741 | 5.138213 | 0.548754 | 3.528888 | high |
| TCGA-55- | 1.643836 | 0 | 5.189783 | 7.255941 | 3.307551 | 2.61841  | 1.963378 | 1.498808 | high |
| TCGA-97- | 5.383562 | 0 | 5.76147  | 5.83255  | 2.912239 | 1.568504 | 4.289882 | 0.440374 | low  |
| TCGA-05- | 1.246575 | 0 | 5.740568 | 6.705368 | 2.784201 | 3.562882 | 2.327435 | 1.132965 | high |
| TCGA-62- | 4.726027 | 1 | 7.418257 | 6.400061 | 2.65582  | 1.369829 | 0.785728 | 0.555672 | low  |
| TCGA-49- | 1.054795 | 1 | 5.393751 | 7.012978 | 3.906898 | 3.287406 | 3.896717 | 1.421953 | high |
| TCGA-62- | 1.134247 | 1 | 6.471808 | 7.77644  | 1.898722 | 2.526914 | 2.402705 | 1.129385 | high |
| TCGA-97- | 1.723288 | 0 | 5.22842  | 6.453662 | 2.583548 | 3.471673 | 5.585174 | 0.774917 | low  |



|          |          |   |          |          |          |          |          |          |      |
|----------|----------|---|----------|----------|----------|----------|----------|----------|------|
| TCGA-78- | 6.465753 | 0 | 6.538195 | 7.014167 | 2.533993 | 3.276797 | 3.604849 | 0.937872 | low  |
| TCGA-MP  | 0.920548 | 1 | 4.144047 | 7.631643 | 2.88664  | 3.018473 | 1.096888 | 2.218611 | high |
| TCGA-55- | 1.49863  | 0 | 5.859045 | 7.832796 | 2.22014  | 2.016584 | 1.468365 | 1.320535 | high |
| TCGA-91- | 0.613699 | 0 | 4.940869 | 7.142398 | 3.382613 | 2.543379 | 3.422848 | 1.301124 | high |
| TCGA-86- | 2.027397 | 0 | 5.404316 | 6.102023 | 2.59741  | 2.791905 | 3.646907 | 0.664377 | low  |
| TCGA-78- | 2.210959 | 1 | 3.688342 | 7.236476 | 1.803435 | 2.496549 | 2.790474 | 1.238298 | high |
| TCGA-L9- | 1.30411  | 0 | 5.353664 | 6.353732 | 2.71502  | 3.096263 | 2.044383 | 0.937746 | low  |
| TCGA-35- | 0.723288 | 0 | 4.270524 | 7.026747 | 1.451934 | 1.484103 | 7.272334 | 0.536539 | low  |
| TCGA-50- | 1.260274 | 1 | 4.914725 | 7.299812 | 3.837698 | 3.095408 | 2.468995 | 1.863818 | high |
| TCGA-55- | 1.476712 | 0 | 6.270717 | 5.954504 | 2.222787 | 3.182848 | 3.059607 | 0.578242 | low  |
| TCGA-38- | 1.227397 | 0 | 4.083271 | 7.156586 | 2.524152 | 2.908625 | 3.885315 | 1.288675 | high |
| TCGA-MN  | 3.219178 | 0 | 6.749856 | 6.775571 | 2.27094  | 4.727551 | 2.048948 | 1.180394 | high |
| TCGA-44- | 0.59726  | 0 | 5.338765 | 6.602683 | 2.682927 | 3.867804 | 2.464096 | 1.178241 | high |
| TCGA-MP  | 7.169863 | 1 | 6.046137 | 6.149056 | 2.942812 | 2.431044 | 1.459915 | 0.744776 | low  |
| TCGA-95- | 1.657534 | 0 | 5.491148 | 6.487843 | 3.457468 | 4.086516 | 3.977318 | 1.172281 | high |
| TCGA-55- | 2.432877 | 0 | 6.795054 | 6.002572 | 2.286012 | 1.884284 | 4.899369 | 0.366088 | low  |
| TCGA-86- | 0.967123 | 0 | 6.339191 | 7.523069 | 2.821441 | 3.16275  | 1.545428 | 1.506404 | high |
| TCGA-95- | 0.238356 | 1 | 6.121692 | 8.629313 | 1.996738 | 2.233252 | 4.588466 | 1.402157 | high |
| TCGA-05- | 2.167123 | 0 | 5.519904 | 8.217312 | 2.449048 | 2.400176 | 2.113677 | 1.769634 | high |
| TCGA-55- | 1.690411 | 0 | 4.95927  | 7.299851 | 2.699411 | 2.211675 | 3.475375 | 1.133302 | high |
| TCGA-99- | 2.90411  | 0 | 7.25363  | 7.181534 | 2.862429 | 3.093961 | 1.538807 | 1.123752 | high |
| TCGA-44- | 1.969863 | 0 | 7.302336 | 7.007638 | 2.878303 | 2.843604 | 4.381033 | 0.770697 | low  |
| TCGA-NJ- | 6.194521 | 0 | 7.161031 | 6.427573 | 2.38916  | 1.922279 | 2.649483 | 0.526823 | low  |
| TCGA-44- | 1.054795 | 0 | 7.043083 | 6.782545 | 3.246539 | 3.064048 | 1.737449 | 1.017605 | high |
| TCGA-62- | 3.983562 | 1 | 3.557201 | 8.793832 | 1.125657 | 2.317399 | 1.429042 | 2.443887 | high |
| TCGA-93- | 0.090411 | 1 | 6.160289 | 6.300559 | 2.310774 | 3.018096 | 3.438626 | 0.656749 | low  |
| TCGA-44- | 0.265753 | 1 | 5.984472 | 6.783011 | 2.318649 | 2.061604 | 3.777453 | 0.675873 | low  |
| TCGA-67- | 1.054795 | 0 | 6.269498 | 6.739451 | 3.807179 | 2.730638 | 4.115668 | 0.952006 | low  |
| TCGA-86- | 1.789041 | 0 | 4.952511 | 7.715419 | 1.801527 | 4.081678 | 2.86256  | 1.755606 | high |
| TCGA-62- | 0.380822 | 1 | 5.092795 | 7.003794 | 3.196327 | 2.758309 | 4.196761 | 1.124067 | high |
| TCGA-MP  | 4.90411  | 1 | 5.680428 | 6.023144 | 2.426973 | 1.773507 | 3.070775 | 0.510199 | low  |
| TCGA-55- | 1.424658 | 0 | 5.243497 | 6.794429 | 3.266419 | 2.418582 | 2.794001 | 1.067608 | high |
| TCGA-64- | 3.19726  | 1 | 6.579679 | 6.827529 | 2.570998 | 2.678614 | 6.845328 | 0.579608 | low  |
| TCGA-50- | 4.794521 | 0 | 6.354945 | 6.096874 | 2.422119 | 1.590424 | 5.661303 | 0.369711 | low  |
| TCGA-44- | 0.786301 | 0 | 5.802128 | 6.92911  | 2.640782 | 2.267309 | 0.995659 | 1.046565 | high |
| TCGA-L4- | 1.191781 | 0 | 6.742098 | 5.696443 | 1.901108 | 3.766945 | 4.675397 | 0.44029  | low  |
| TCGA-49- | 13.67671 | 0 | 5.783628 | 5.628129 | 3.77871  | 4.261843 | 4.54384  | 0.796599 | low  |
| TCGA-49- | 0.734247 | 1 | 4.09138  | 7.504951 | 2.659863 | 1.921212 | 0.272375 | 1.737002 | high |
| TCGA-75- | 8.380822 | 0 | 4.131559 | 7.16747  | 2.788499 | 3.632136 | 1.942322 | 1.850754 | high |
| TCGA-38- | 8.145205 | 0 | 3.407159 | 8.12607  | 3.04903  | 4.06935  | 1.898731 | 3.682631 | high |
| TCGA-44- | 0.712329 | 0 | 5.784395 | 7.190739 | 3.065691 | 3.352893 | 4.569008 | 1.17875  | high |
| TCGA-44- | 7.167123 | 0 | 5.853209 | 6.637588 | 1.773752 | 2.554208 | 3.079657 | 0.676298 | low  |
| TCGA-62- | 4.10411  | 1 | 5.051941 | 7.00248  | 3.832601 | 2.503549 | 2.647408 | 1.393392 | high |
| TCGA-75- | 5.553425 | 1 | 5.57293  | 7.054012 | 2.118254 | 2.321731 | 1.800176 | 0.973244 | low  |
| TCGA-64- | 3.257534 | 0 | 3.969411 | 8.040362 | 5.251591 | 0.633083 | 3.629039 | 2.206937 | high |
| TCGA-95- | 1.556164 | 0 | 5.167524 | 6.74343  | 3.079415 | 2.350395 | 1.959265 | 1.075913 | high |
| TCGA-99- | 1.80274  | 0 | 6.301102 | 5.61166  | 3.236271 | 4.385263 | 4.856395 | 0.656953 | low  |
| TCGA-97- | 0.449315 | 1 | 5.073352 | 5.437936 | 2.185918 | 3.83961  | 4.79682  | 0.527907 | low  |
| TCGA-55- | 1.923288 | 1 | 5.639864 | 6.966082 | 2.365793 | 3.285861 | 2.162909 | 1.143356 | high |
| TCGA-69- | 1.619178 | 0 | 7.175727 | 6.486481 | 2.208228 | 2.422634 | 2.823876 | 0.567076 | low  |
| TCGA-55- | 0.482192 | 1 | 4.826201 | 7.593934 | 2.454157 | 3.727752 | 1.655301 | 1.991255 | high |
| TCGA-78- | 9.958904 | 0 | 7.109649 | 7.015619 | 2.305764 | 1.812494 | 4.808479 | 0.556225 | low  |
| TCGA-05- | 0.169863 | 0 | 6.268126 | 6.680547 | 2.105949 | 2.352508 | 2.584876 | 0.696265 | low  |
| TCGA-69- | 1.120548 | 0 | 7.029785 | 6.097832 | 4.011695 | 2.28367  | 3.536589 | 0.636461 | low  |
| TCGA-J2- | 2.956164 | 0 | 6.055036 | 6.113257 | 3.844341 | 2.139895 | 4.278346 | 0.64993  | low  |
| TCGA-78- | 1.824658 | 1 | 3.460808 | 8.821105 | 3.050782 | 3.569593 | 2.018553 | 4.508404 | high |

|          |          |   |          |          |          |          |          |          |      |
|----------|----------|---|----------|----------|----------|----------|----------|----------|------|
| TCGA-93- | 1.967123 | 0 | 4.725459 | 5.750935 | 2.94949  | 2.858524 | 5.629234 | 0.571848 | low  |
| TCGA-J2- | 1.983562 | 0 | 5.9797   | 7.043507 | 2.813912 | 3.505727 | 3.055198 | 1.195234 | high |
| TCGA-55- | 0.468493 | 1 | 5.817168 | 7.841353 | 2.516029 | 2.889205 | 2.0046   | 1.609102 | high |
| TCGA-55- | 2.117808 | 0 | 5.131159 | 7.395489 | 1.703464 | 1.627666 | 1.076667 | 1.033917 | high |
| TCGA-50- | 8.476712 | 0 | 5.858148 | 7.036504 | 2.429289 | 3.440167 | 3.861512 | 1.033747 | high |
| TCGA-49- | 2.454795 | 1 | 5.998178 | 5.724496 | 3.010349 | 3.183851 | 2.799454 | 0.647961 | low  |
| TCGA-73- | 2.191781 | 0 | 7.374414 | 7.460309 | 2.433483 | 2.569153 | 1.719804 | 1.021429 | high |
| TCGA-MP  | 6.158904 | 0 | 6.603077 | 5.914542 | 2.404449 | 2.72267  | 1.932271 | 0.564035 | low  |
| TCGA-55- | 1.652055 | 0 | 6.43589  | 7.231878 | 2.041607 | 1.720993 | 1.286658 | 0.851881 | low  |
| TCGA-95- | 3.484932 | 0 | 7.402686 | 6.859989 | 2.450399 | 3.247328 | 2.730333 | 0.813259 | low  |
| TCGA-78- | 2.673973 | 1 | 6.995356 | 5.99078  | 1.997153 | 2.844709 | 3.135011 | 0.470402 | low  |
| TCGA-55- | 1.284932 | 1 | 5.595698 | 8.468865 | 2.856994 | 4.270227 | 3.794013 | 2.683135 | high |
| TCGA-44- | 1.526027 | 1 | 6.308577 | 8.71594  | 2.917118 | 3.875703 | 3.285802 | 2.651984 | high |
| TCGA-97- | 2.123288 | 0 | 7.018388 | 7.710843 | 2.353736 | 3.534395 | 5.917899 | 1.00469  | high |
| TCGA-78- | 7.345205 | 1 | 5.749198 | 6.335032 | 2.177117 | 2.15425  | 2.513321 | 0.627656 | low  |
| TCGA-50- | 0.517808 | 1 | 4.499855 | 7.570326 | 2.677959 | 4.698007 | 2.279205 | 2.484031 | high |
| TCGA-64- | 1.720548 | 1 | 4.45058  | 7.501683 | 1.761758 | 1.852373 | 4.085702 | 0.97885  | low  |
| TCGA-97- | 1.556164 | 0 | 6.523798 | 6.420957 | 3.210807 | 1.994486 | 4.434954 | 0.590875 | low  |
| TCGA-97- | 1.8      | 0 | 5.288845 | 7.15214  | 2.279138 | 2.499162 | 2.242036 | 1.09265  | high |
| TCGA-62- | 3.271233 | 1 | 6.284609 | 7.372508 | 2.299031 | 2.406779 | 2.784134 | 0.986514 | low  |
| TCGA-97- | 1.556164 | 0 | 6.283075 | 7.349248 | 1.70213  | 2.004902 | 0.283951 | 0.990013 | low  |
| TCGA-44- | 1.928767 | 0 | 5.817032 | 4.609666 | 2.558156 | 2.585805 | 7.469142 | 0.216367 | low  |
| TCGA-MP  | 0.457534 | 1 | 5.847507 | 7.145818 | 3.55579  | 3.108644 | 2.899776 | 1.387227 | high |
| TCGA-49- | 4.657534 | 0 | 5.679476 | 7.630922 | 2.497353 | 2.382306 | 1.681844 | 1.37892  | high |
| TCGA-50- | 4.430137 | 0 | 4.505271 | 6.119322 | 2.305998 | 2.348941 | 4.487642 | 0.611977 | low  |
| TCGA-55- | 1.410959 | 0 | 7.589174 | 6.534992 | 2.209155 | 3.969402 | 5.092577 | 0.612961 | low  |
| TCGA-55- | 1.468493 | 0 | 4.253398 | 6.571492 | 3.621563 | 4.499197 | 6.668499 | 1.296501 | high |
| TCGA-71- | 0.575342 | 1 | 4.98733  | 7.091211 | 2.486065 | 3.291897 | 5.596956 | 1.016454 | high |
| TCGA-69- | 0.367123 | 0 | 5.349656 | 7.549533 | 2.620921 | 2.917833 | 2.093884 | 1.533518 | high |
| TCGA-L9- | 0.528767 | 1 | 6.897651 | 7.315219 | 2.89571  | 2.836907 | 2.98699  | 1.062393 | high |
| TCGA-55- | 1.334247 | 0 | 5.36585  | 5.994325 | 1.86891  | 2.335911 | 4.960118 | 0.448133 | low  |
| TCGA-78- | 1.624658 | 1 | 4.425645 | 6.527671 | 2.941983 | 2.704559 | 3.616803 | 0.981587 | low  |
| TCGA-S2- | 1.405479 | 0 | 5.782882 | 6.104396 | 4.133518 | 2.990433 | 1.933985 | 1.033173 | high |
| TCGA-05- | 0.413699 | 0 | 7.98578  | 7.097943 | 2.225746 | 1.164644 | 3.687707 | 0.48496  | low  |
| TCGA-50- | 0.326027 | 1 | 2.179074 | 7.784535 | 2.168021 | 2.606393 | 7.600891 | 1.440934 | high |
| TCGA-62- | 3.331507 | 0 | 6.277117 | 6.719016 | 2.142565 | 3.219607 | 3.189128 | 0.805016 | low  |
| TCGA-55- | 0.326027 | 0 | 5.249793 | 7.473811 | 2.454139 | 1.585847 | 3.463772 | 0.990378 | low  |
| TCGA-49- | 2.961644 | 1 | 5.767646 | 8.016749 | 2.22121  | 1.905171 | 2.422254 | 1.312634 | high |
| TCGA-49- | 3.893151 | 1 | 5.057737 | 6.895792 | 2.295433 | 1.885633 | 3.794475 | 0.780094 | low  |
| TCGA-91- | 2.306849 | 0 | 2.745877 | 6.823414 | 2.467922 | 2.790159 | 5.416287 | 1.134237 | high |
| TCGA-86- | 2.019178 | 1 | 6.423719 | 7.091518 | 2.582307 | 2.416491 | 2.235461 | 0.944627 | low  |
| TCGA-49- | 6.093151 | 0 | 5.812233 | 6.348489 | 1.64347  | 1.899427 | 0.785102 | 0.619633 | low  |
| TCGA-73- | 2.526027 | 1 | 7.198133 | 7.088671 | 3.457002 | 3.152218 | 1.578045 | 1.233117 | high |
| TCGA-38- | 4.087671 | 1 | 6.876125 | 6.251418 | 2.184904 | 1.792253 | 4.628294 | 0.399517 | low  |
| TCGA-O1- | 4.926027 | 1 | 8.017182 | 7.331674 | 1.821528 | 2.27163  | 3.543733 | 0.625945 | low  |
| TCGA-05- | 0.830137 | 1 | 6.014425 | 7.088707 | 2.435161 | 2.718    | 1.467969 | 1.101597 | high |
| TCGA-44- | 1.621918 | 0 | 4.742059 | 6.512563 | 1.502141 | 2.736475 | 4.107986 | 0.673269 | low  |
| TCGA-86- | 2.6      | 0 | 7.278774 | 7.219695 | 2.67366  | 2.33715  | 2.664055 | 0.856653 | low  |
| TCGA-97- | 1.545205 | 0 | 7.167651 | 7.221993 | 1.975722 | 2.323896 | 1.132014 | 0.861294 | low  |
| TCGA-05- | 1.252055 | 0 | 6.532458 | 7.779505 | 1.884429 | 1.899736 | 2.343002 | 0.991457 | high |
| TCGA-78- | 0.879452 | 1 | 3.637223 | 8.513377 | 3.241059 | 3.611819 | 0.39448  | 4.59431  | high |
| TCGA-67- | 1.671233 | 0 | 4.713908 | 7.141874 | 3.350416 | 2.748572 | 2.804739 | 1.466586 | high |
| TCGA-38- | 2.191781 | 1 | 5.566049 | 6.1418   | 2.960815 | 2.805708 | 4.845327 | 0.643593 | low  |
| TCGA-78- | 19.85753 | 0 | 6.154993 | 8.287703 | 2.178694 | 0.399489 | 1.457767 | 1.121431 | high |
| TCGA-73- | 4.383562 | 1 | 6.807931 | 6.937561 | 2.850991 | 3.240214 | 2.897304 | 0.979116 | low  |
| TCGA-78- | 1.909589 | 1 | 6.233193 | 6.519192 | 2.463156 | 2.954925 | 3.056933 | 0.75603  | low  |

|          |          |   |          |          |          |          |          |          |      |
|----------|----------|---|----------|----------|----------|----------|----------|----------|------|
| TCGA-49- | 4.441096 | 0 | 5.006197 | 6.828976 | 2.680901 | 3.469551 | 3.084562 | 1.200468 | high |
| TCGA-05- | 1.832877 | 0 | 6.155208 | 8.579187 | 2.6623   | 2.89206  | 0.417004 | 2.540828 | high |
| TCGA-78- | 13.59178 | 1 | 6.557467 | 6.920013 | 2.970674 | 1.463971 | 5.128727 | 0.597524 | low  |
| TCGA-55- | 1.265753 | 0 | 6.808738 | 5.996944 | 2.44212  | 0.980428 | 3.27195  | 0.360886 | low  |
| TCGA-55- | 8.934247 | 0 | 5.325001 | 7.893315 | 3.089359 | 2.242567 | 2.917709 | 1.612692 | high |
| TCGA-69- | 0.452055 | 0 | 5.53169  | 7.53884  | 2.407206 | 2.911632 | 2.50758  | 1.373    | high |
| TCGA-55- | 2.389041 | 0 | 7.269786 | 6.576163 | 3.112813 | 2.688507 | 1.744556 | 0.80865  | low  |
| TCGA-50- | 3.473973 | 1 | 7.426761 | 6.466292 | 2.798578 | 1.787544 | 2.828247 | 0.537315 | low  |
| TCGA-73- | 0.10411  | 1 | 5.321837 | 6.737118 | 3.293706 | 2.689022 | 2.17391  | 1.150737 | high |
| TCGA-05- | 1.252055 | 1 | 5.875201 | 6.972342 | 3.594699 | 2.798437 | 3.247176 | 1.173134 | high |
| TCGA-MP  | 4.871233 | 1 | 7.624503 | 6.67351  | 2.394905 | 2.062426 | 1.897161 | 0.606152 | low  |
| TCGA-55- | 4.471233 | 1 | 5.900872 | 5.512758 | 1.937855 | 1.354311 | 2.350127 | 0.346638 | low  |
| TCGA-78- | 4.186301 | 1 | 5.132941 | 5.898733 | 2.485988 | 3.959842 | 3.120418 | 0.812504 | low  |
| TCGA-44- | 3.745205 | 0 | 6.326723 | 6.938019 | 1.692183 | 2.814979 | 2.258444 | 0.806722 | low  |
| TCGA-55- | 7.734247 | 0 | 6.130825 | 7.018826 | 2.491952 | 2.017055 | 2.250945 | 0.862736 | low  |
| TCGA-97- | 1.786301 | 0 | 5.739718 | 6.947189 | 2.006497 | 1.574677 | 2.078082 | 0.744135 | low  |
| TCGA-50- | 4.106849 | 1 | 5.511271 | 7.690475 | 2.253545 | 0.958937 | 2.270723 | 0.989306 | low  |
| TCGA-86- | 2.205479 | 0 | 7.077697 | 5.151729 | 2.829161 | 4.483737 | 5.228888 | 0.433039 | low  |
| TCGA-86- | 0.317808 | 1 | 5.305799 | 6.91244  | 5.027218 | 3.718395 | 3.490781 | 1.942751 | high |
| TCGA-55- | 2.476712 | 0 | 5.39084  | 7.555853 | 2.279815 | 2.376838 | 1.595531 | 1.337438 | high |
| TCGA-50- | 1.789041 | 1 | 7.020532 | 7.231726 | 2.037124 | 2.601403 | 4.58704  | 0.703367 | low  |
| TCGA-53- | 1.161644 | 0 | 5.825443 | 7.92223  | 2.134174 | 1.020055 | 1.617628 | 1.09965  | high |
| TCGA-73- | 6.890411 | 0 | 7.284572 | 6.478675 | 2.532155 | 1.889711 | 2.346366 | 0.556033 | low  |
| TCGA-62- | 7.386301 | 0 | 4.394539 | 6.911303 | 4.257285 | 3.275299 | 3.377318 | 1.752132 | high |
| TCGA-44- | 2.435616 | 0 | 5.104582 | 6.878552 | 2.615387 | 2.742046 | 2.881169 | 1.051729 | high |
| TCGA-97- | 5.293151 | 0 | 6.228407 | 6.226815 | 2.640071 | 2.496759 | 3.926956 | 0.580466 | low  |
| TCGA-44- | 1.630137 | 0 | 4.907109 | 7.82281  | 2.670493 | 2.16538  | 2.472369 | 1.558909 | high |
| TCGA-44- | 2.416438 | 0 | 4.081487 | 6.782639 | 4.007872 | 3.555108 | 3.634395 | 1.699422 | high |
| TCGA-49- | 10.29863 | 0 | 6.806577 | 7.354657 | 2.840949 | 4.430089 | 2.075176 | 1.61103  | high |
| TCGA-44- | 3.70137  | 0 | 5.806007 | 6.503622 | 1.931828 | 2.281424 | 5.102018 | 0.526305 | low  |
| TCGA-55- | 1.410959 | 0 | 3.058639 | 7.40012  | 2.795983 | 3.759461 | 4.671246 | 1.953425 | high |
| TCGA-64- | 4.734247 | 0 | 6.516659 | 7.472757 | 2.224927 | 0.748179 | 1.745206 | 0.772772 | low  |
| TCGA-91- | 1.383562 | 0 | 7.422707 | 6.31609  | 2.097977 | 1.651517 | 4.145049 | 0.378993 | low  |
| TCGA-35- | 0.038356 | 0 | 5.016349 | 7.062364 | 1.847978 | 1.789154 | 1.447269 | 0.928764 | low  |
| TCGA-55- | 1.969863 | 1 | 6.342971 | 7.365512 | 2.366451 | 3.17963  | 3.64885  | 1.071043 | high |
| TCGA-67- | 0.476712 | 0 | 7.357129 | 7.789087 | 1.473477 | 1.789701 | 2.244898 | 0.803803 | low  |
| TCGA-53- | 2.934247 | 0 | 5.673355 | 6.046394 | 1.685567 | 1.526506 | 1.259338 | 0.494459 | low  |
| TCGA-MP  | 4.112329 | 1 | 5.867742 | 7.725698 | 1.965897 | 2.04743  | 1.479223 | 1.199276 | high |
| TCGA-73- | 0.769863 | 1 | 5.678252 | 7.525553 | 2.258045 | 2.901765 | 2.889909 | 1.252617 | high |
| TCGA-86- | 1.90137  | 1 | 5.24359  | 7.188909 | 3.02889  | 2.982731 | 5.619809 | 1.072328 | high |
| TCGA-78- | 0.879452 | 1 | 5.133841 | 7.206065 | 2.317105 | 3.244687 | 2.527767 | 1.306847 | high |
| TCGA-91- | 1.019178 | 0 | 4.008196 | 4.585186 | 2.305395 | 3.457216 | 8.962418 | 0.275961 | low  |
| TCGA-44- | 3.564384 | 0 | 4.717362 | 7.678885 | 2.713995 | 2.454909 | 1.884597 | 1.685126 | high |
| TCGA-75- | 9.054795 | 0 | 5.700748 | 6.009645 | 2.217417 | 1.949423 | 4.904413 | 0.429114 | low  |
| TCGA-44- | 1.331507 | 0 | 4.342916 | 6.791672 | 3.212688 | 2.534702 | 2.205489 | 1.291725 | high |
| TCGA-44- | 3.241096 | 0 | 3.417776 | 6.25457  | 1.140004 | 1.272402 | 3.813974 | 0.514604 | low  |
| TCGA-62- | 2.493151 | 0 | 6.464262 | 7.528623 | 1.85769  | 2.082162 | 2.260899 | 0.926705 | low  |
| TCGA-MP  | 7.178082 | 1 | 6.621413 | 7.222516 | 2.514353 | 2.354965 | 1.473226 | 1.014408 | high |
| TCGA-49- | 3.109589 | 1 | 5.348823 | 6.269269 | 2.832423 | 2.71421  | 2.097019 | 0.852445 | low  |
| TCGA-50- | 0.684932 | 1 | 4.778824 | 7.27618  | 2.606789 | 3.868355 | 2.934196 | 1.646422 | high |
| TCGA-55- | 2.547945 | 0 | 5.241186 | 6.319577 | 2.46741  | 3.181342 | 0.56521  | 1.030522 | high |
| TCGA-97- | 1.682192 | 0 | 6.276214 | 6.919831 | 2.478666 | 3.238859 | 2.861226 | 0.975308 | low  |
| TCGA-L9- | 0.841096 | 0 | 7.295108 | 6.225293 | 2.448987 | 3.068782 | 1.00245  | 0.689905 | low  |
| TCGA-55- | 1.221918 | 0 | 6.071842 | 6.570444 | 2.661964 | 2.234098 | 1.542509 | 0.81277  | low  |
| TCGA-50- | 0.843836 | 1 | 5.977386 | 7.430566 | 2.422315 | 2.705199 | 4.251292 | 1.015972 | high |
| TCGA-91- | 1.347945 | 0 | 5.961898 | 6.733091 | 3.374319 | 3.093805 | 3.983873 | 0.988919 | low  |

|          |          |   |          |          |          |          |          |          |      |
|----------|----------|---|----------|----------|----------|----------|----------|----------|------|
| TCGA-97- | 1.646575 | 0 | 7.277557 | 5.216568 | 1.915946 | 2.63895  | 5.27926  | 0.248653 | low  |
| TCGA-44- | 2.364384 | 0 | 4.246559 | 6.541149 | 3.680343 | 1.681186 | 4.101532 | 0.919138 | low  |
| TCGA-78- | 0.668493 | 1 | 6.012031 | 7.584561 | 1.513855 | 1.98838  | 3.354228 | 0.846231 | low  |
| TCGA-MP  | 1.175342 | 1 | 7.329915 | 7.888928 | 2.562088 | 4.292493 | 2.216884 | 1.7368   | high |
| TCGA-05- | 1.583562 | 0 | 6.762661 | 6.785602 | 3.516791 | 3.420371 | 4.11266  | 0.981226 | low  |
| TCGA-99- | 2.046575 | 0 | 6.792249 | 7.698109 | 1.830721 | 3.014191 | 3.260761 | 1.051157 | high |
| TCGA-64- | 3.575342 | 0 | 6.606666 | 6.904012 | 2.806849 | 1.429576 | 2.404168 | 0.714746 | low  |
| TCGA-78- | 2.263014 | 1 | 7.352428 | 7.64225  | 2.883166 | 2.981491 | 2.556429 | 1.232444 | high |
| TCGA-NJ- | 0.136986 | 0 | 5.517733 | 7.045798 | 2.732037 | 2.931231 | 0.498075 | 1.395722 | high |
| TCGA-55- | 1.668493 | 0 | 6.653006 | 6.711593 | 2.358234 | 2.789023 | 4.480475 | 0.652196 | low  |
| TCGA-55- | 1.846575 | 0 | 6.071233 | 6.913058 | 2.741215 | 3.428219 | 2.782102 | 1.10356  | high |
| TCGA-55- | 1.309589 | 0 | 5.411473 | 7.268356 | 3.069427 | 3.52279  | 1.777329 | 1.694355 | high |
| TCGA-05- | 1.167123 | 0 | 6.346317 | 6.340611 | 2.138482 | 3.575732 | 3.779939 | 0.683063 | low  |
| TCGA-55- | 1.512329 | 0 | 5.937127 | 6.273872 | 3.227429 | 4.557381 | 1.359707 | 1.308131 | high |
| TCGA-97- | 1.326027 | 0 | 6.735218 | 6.476484 | 3.158577 | 2.801474 | 4.389921 | 0.686315 | low  |
| TCGA-62- | 3.531507 | 0 | 6.486691 | 6.888632 | 2.589323 | 1.354937 | 0.958348 | 0.770681 | low  |
| TCGA-91- | 0.164384 | 0 | 5.255078 | 7.80452  | 3.043522 | 3.846628 | 4.832082 | 1.811594 | high |
| TCGA-44- | 3.186301 | 0 | 5.935121 | 8.254185 | 2.669985 | 3.612863 | 4.043001 | 1.91459  | high |
| TCGA-55- | 1.536986 | 1 | 5.237527 | 7.168454 | 3.526051 | 2.233737 | 0.839113 | 1.523365 | high |
| TCGA-55- | 1.920548 | 1 | 6.020384 | 6.817365 | 2.500682 | 3.059631 | 4.909864 | 0.784852 | low  |
| TCGA-64- | 0.169863 | 1 | 4.522005 | 7.922485 | 2.246673 | 2.395159 | 0.760408 | 1.920131 | high |
| TCGA-44- | 1.893151 | 0 | 6.035977 | 7.346823 | 2.968737 | 1.499403 | 1.402704 | 1.085249 | high |
| TCGA-55- | 1.665753 | 0 | 6.437023 | 5.412912 | 2.26817  | 1.742166 | 3.513896 | 0.32042  | low  |
| TCGA-55- | 3.378082 | 0 | 5.489061 | 6.9933   | 3.482768 | 2.570986 | 4.226593 | 1.075622 | high |
| TCGA-86- | 3.145205 | 0 | 3.558921 | 8.17582  | 2.706855 | 2.009679 | 4.075379 | 1.893599 | high |
| TCGA-38- | 2.367123 | 1 | 6.016389 | 8.205077 | 2.44432  | 3.542425 | 1.222291 | 2.219841 | high |
| TCGA-78- | 1.605479 | 1 | 5.258573 | 6.455538 | 2.474953 | 1.737315 | 5.195079 | 0.552601 | low  |
| TCGA-55- | 0.421918 | 1 | 3.549534 | 7.188121 | 3.566779 | 2.546419 | 2.087001 | 1.88811  | high |
| TCGA-86- | 2.454795 | 0 | 6.399824 | 6.045978 | 3.851821 | 2.480541 | 3.150151 | 0.708134 | low  |
| TCGA-05- | 0.753425 | 1 | 6.275836 | 8.631493 | 4.04127  | 2.644556 | 1.644568 | 2.89091  | high |
| TCGA-55- | 1.887671 | 0 | 5.772213 | 6.344395 | 2.499345 | 2.538199 | 3.656533 | 0.656193 | low  |
| TCGA-86- | 2.361644 | 0 | 5.196167 | 7.149024 | 2.555226 | 2.641576 | 1.746546 | 1.254501 | high |
| TCGA-86- | 2.208219 | 0 | 6.38329  | 7.711708 | 2.963255 | 2.300889 | 0.493111 | 1.547561 | high |
| TCGA-49- | 4.610959 | 0 | 6.578005 | 7.102985 | 2.460876 | 2.626819 | 3.546225 | 0.844999 | low  |
| TCGA-44- | 2.775342 | 0 | 3.003046 | 6.852689 | 2.689418 | 1.773505 | 4.688288 | 1.006427 | high |
| TCGA-05- | 1.663014 | 0 | 5.496814 | 7.371251 | 3.317234 | 3.732897 | 3.79837  | 1.617758 | high |
| TCGA-49- | 18.44384 | 0 | 4.981249 | 6.610681 | 2.016384 | 1.270379 | 1.358323 | 0.712643 | low  |
| TCGA-55- | 1.482192 | 0 | 3.76205  | 6.913566 | 2.946384 | 2.42238  | 2.976228 | 1.288385 | high |
| TCGA-MP  | 0.20274  | 1 | 6.76019  | 7.137385 | 3.047658 | 3.118388 | 1.851025 | 1.200088 | high |
| TCGA-49- | 13.05479 | 0 | 6.397867 | 6.551568 | 2.771481 | 3.112987 | 5.386548 | 0.674083 | low  |
| TCGA-05- | 2.167123 | 0 | 7.520989 | 6.920508 | 2.583824 | 2.018785 | 2.009867 | 0.702843 | low  |
| TCGA-75- | 3.054795 | 1 | 4.312633 | 7.343807 | 3.160863 | 2.288797 | 0.370035 | 1.844011 | high |
| TCGA-69- | 1.890411 | 0 | 5.257698 | 6.565397 | 3.092299 | 3.592195 | 3.927811 | 1.062167 | high |
| TCGA-86- | 2.720548 | 0 | 6.62966  | 7.05947  | 2.490084 | 2.247694 | 2.479279 | 0.840041 | low  |
| TCGA-78- | 4.443836 | 1 | 6.405612 | 6.252586 | 2.186745 | 2.463243 | 1.284546 | 0.651227 | low  |
| TCGA-78- | 0.706849 | 1 | 5.41068  | 7.691036 | 3.180261 | 2.661953 | 0.818699 | 1.923798 | high |
| TCGA-55- | 2.435616 | 0 | 5.604453 | 7.474606 | 1.915156 | 2.31817  | 2.74846  | 1.039912 | high |
| TCGA-35- | 0.49863  | 0 | 5.131874 | 8.370708 | 2.177584 | 2.222723 | 1.19281  | 1.985463 | high |
| TCGA-55- | 1.835616 | 0 | 6.245693 | 6.458999 | 2.330358 | 2.124514 | 2.534296 | 0.633275 | low  |
| TCGA-64- | 4.271233 | 0 | 2.89337  | 6.99748  | 2.89462  | 2.05488  | 1.813411 | 1.540733 | high |
| TCGA-L9- | 1.210959 | 1 | 6.8759   | 6.899833 | 2.704563 | 2.739023 | 1.873177 | 0.913965 | low  |
| TCGA-97- | 1.736986 | 0 | 5.696473 | 6.621614 | 2.422814 | 3.551913 | 4.511457 | 0.844408 | low  |
| TCGA-35- | 0.616438 | 0 | 6.436948 | 8.089147 | 1.991642 | 2.392397 | 2.51734  | 1.287217 | high |
| TCGA-55- | 1.783562 | 0 | 5.914096 | 7.341312 | 2.375968 | 2.721715 | 3.841328 | 1.013042 | high |
| TCGA-86- | 0.490411 | 0 | 5.286438 | 6.957817 | 2.177606 | 2.391186 | 2.166111 | 0.964767 | low  |
| TCGA-NJ- | 5.920548 | 0 | 5.696072 | 7.888181 | 2.206952 | 2.200141 | 1.50625  | 1.42992  | high |

|          |          |   |          |          |          |          |          |          |      |
|----------|----------|---|----------|----------|----------|----------|----------|----------|------|
| TCGA-05- | 3.750685 | 0 | 5.686953 | 6.342973 | 1.760758 | 1.81182  | 2.19011  | 0.561318 | low  |
| TCGA-NJ- | 3.923288 | 0 | 5.567193 | 6.386768 | 1.524712 | 2.549662 | 1.48852  | 0.683748 | low  |
| TCGA-55- | 3.778082 | 1 | 5.250912 | 8.082035 | 2.837781 | 3.71996  | 3.756577 | 2.112663 | high |
| TCGA-97- | 3.520548 | 0 | 6.193872 | 6.507718 | 3.297829 | 2.59352  | 6.054146 | 0.643681 | low  |
| TCGA-MN  | 2.265753 | 0 | 5.77837  | 6.064416 | 3.107745 | 3.414428 | 3.315777 | 0.798751 | low  |
| TCGA-62- | 3.413699 | 0 | 4.342282 | 7.594337 | 3.017369 | 2.949364 | 0.604583 | 2.238754 | high |
| TCGA-55- | 2.257534 | 0 | 3.367041 | 6.833859 | 1.705433 | 3.345641 | 1.218549 | 1.431945 | high |
| TCGA-55- | 1.205479 | 1 | 6.040227 | 8.103938 | 2.817405 | 1.963702 | 6.563369 | 1.051128 | high |
| TCGA-78- | 3.312329 | 1 | 6.319131 | 6.318898 | 3.509697 | 3.903675 | 4.875456 | 0.869084 | low  |
| TCGA-67- | 1.671233 | 0 | 6.190763 | 7.175719 | 2.349023 | 1.445349 | 4.914386 | 0.634468 | low  |
| TCGA-50- | 0.70411  | 1 | 4.973782 | 7.906527 | 2.734598 | 2.879969 | 1.581075 | 2.023433 | high |
| TCGA-67- | 0.386301 | 0 | 5.691493 | 7.677611 | 2.200757 | 1.419278 | 1.795418 | 1.082765 | high |
| TCGA-69- | 0.50411  | 0 | 7.851521 | 7.615733 | 2.694804 | 3.218151 | 2.834234 | 1.117326 | high |
| TCGA-93- | 1.441096 | 0 | 5.392129 | 6.775609 | 2.279987 | 3.237759 | 2.138825 | 1.058748 | high |
| TCGA-55- | 2.676712 | 0 | 6.569223 | 6.775109 | 3.185506 | 2.376981 | 3.694062 | 0.790541 | low  |
| TCGA-97- | 1.282192 | 1 | 5.566564 | 7.022489 | 1.921508 | 2.374154 | 2.024285 | 0.914911 | low  |
| TCGA-86- | 1.920548 | 0 | 6.076279 | 6.648832 | 2.707624 | 2.626228 | 4.8587   | 0.691847 | low  |
| TCGA-MP  | 0.441096 | 1 | 5.211064 | 7.044547 | 2.829954 | 3.540874 | 2.09078  | 1.464875 | high |
| TCGA-55- | 1.632877 | 0 | 6.828519 | 5.823362 | 1.717671 | 2.89354  | 2.949599 | 0.432683 | low  |
| TCGA-J2- | 2.024658 | 0 | 5.930221 | 7.135162 | 2.886016 | 2.492774 | 3.939065 | 0.96478  | low  |
| TCGA-50- | 2.271233 | 0 | 5.500612 | 7.000915 | 1.967162 | 2.853791 | 2.461891 | 0.978291 | low  |
| TCGA-NJ- | 0.041096 | 0 | 4.926179 | 5.837768 | 2.371584 | 2.568683 | 4.264636 | 0.546217 | low  |
| TCGA-55- | 1.30411  | 0 | 6.458778 | 5.775495 | 2.909904 | 2.440338 | 5.218789 | 0.426462 | low  |
| TCGA-55- | 0.271233 | 1 | 6.180893 | 7.013834 | 2.858571 | 2.420557 | 1.113734 | 1.099021 | high |
| TCGA-86- | 2.865753 | 1 | 2.296871 | 7.182313 | 2.41731  | 4.764932 | 2.502027 | 2.688588 | high |
| TCGA-MP  | 1.594521 | 1 | 6.718081 | 6.83542  | 2.350647 | 3.427125 | 2.525572 | 0.917125 | low  |
| TCGA-50- | 3.950685 | 0 | 4.634088 | 7.756302 | 2.219703 | 1.93572  | 1.671844 | 1.46919  | high |
| TCGA-50- | 5.060274 | 0 | 6.009767 | 6.380088 | 2.053969 | 1.686782 | 4.215255 | 0.474185 | low  |
| TCGA-69- | 2.227397 | 0 | 7.92199  | 6.320629 | 4.173539 | 2.839539 | 3.683519 | 0.707298 | low  |
| TCGA-44- | 0.780822 | 0 | 4.226054 | 7.989867 | 3.215573 | 2.714207 | 1.856663 | 2.435445 | high |
| TCGA-78- | 0.473973 | 1 | 5.035252 | 8.299785 | 2.422201 | 2.056285 | 1.592096 | 1.913174 | high |
| TCGA-91- | 0.09863  | 0 | 4.108657 | 7.984688 | 4.2852   | 2.595428 | 3.106171 | 2.687453 | high |
| TCGA-55- | 1.271233 | 1 | 4.483699 | 7.50565  | 2.685984 | 2.948943 | 3.004441 | 1.604417 | high |
| TCGA-05- | 2.49863  | 0 | 5.380057 | 7.019307 | 1.943997 | 2.115768 | 4.64643  | 0.715146 | low  |
| TCGA-86- | 2.594521 | 0 | 5.04179  | 7.285596 | 1.603228 | 2.02939  | 1.919928 | 0.983624 | low  |
| TCGA-NJ- | 1.652055 | 0 | 4.399639 | 7.089749 | 2.634456 | 3.091391 | 3.271202 | 1.334772 | high |
| TCGA-05- | 2.00274  | 1 | 4.007143 | 6.819157 | 3.559801 | 1.942867 | 3.454077 | 1.175087 | high |
| TCGA-53- | 2.545205 | 1 | 6.471556 | 6.322083 | 3.419509 | 3.52358  | 4.297756 | 0.814472 | low  |
| TCGA-95- | 1.032877 | 0 | 4.904804 | 7.425116 | 2.495961 | 2.164394 | 1.561652 | 1.35546  | high |
| TCGA-73- | 0.931507 | 1 | 4.215651 | 6.021947 | 3.126984 | 1.952322 | 0.600105 | 0.926964 | low  |
| TCGA-44- | 3.005479 | 0 | 4.875563 | 7.416904 | 1.877455 | 2.239246 | 3.572015 | 1.023459 | high |
| TCGA-NJ- | 0.035616 | 0 | 6.15387  | 6.520217 | 3.037002 | 3.113799 | 2.980828 | 0.891901 | low  |
| TCGA-55- | 1.463014 | 0 | 6.638468 | 7.582839 | 2.042007 | 2.974158 | 1.319265 | 1.245548 | high |
| TCGA-05- | 0.249315 | 1 | 3.024066 | 10.11061 | 2.874998 | 1.728473 | 1.806304 | 5.911782 | high |
| TCGA-91- | 0.216438 | 0 | 5.190742 | 5.981906 | 1.847659 | 2.706665 | 5.198192 | 0.480024 | low  |
| TCGA-55- | 1.210959 | 0 | 6.252633 | 7.485959 | 2.307047 | 1.688555 | 3.877071 | 0.825156 | low  |
| TCGA-55- | 0.030137 | 0 | 7.406104 | 6.929269 | 2.742501 | 2.416845 | 1.113347 | 0.865856 | low  |
| TCGA-50- | 1.189041 | 1 | 3.19969  | 6.930773 | 3.388164 | 3.152818 | 4.165243 | 1.607352 | high |
| TCGA-55- | 1.317808 | 0 | 5.927685 | 6.819325 | 3.000824 | 2.70769  | 0.845967 | 1.161887 | high |
| TCGA-50- | 0.772603 | 1 | 4.933891 | 6.360063 | 2.295472 | 3.208193 | 2.566542 | 0.8978   | low  |
| TCGA-38- | 3.142466 | 1 | 4.333425 | 7.409998 | 2.741801 | 2.98767  | 3.649234 | 1.512889 | high |
| TCGA-67- | 1.227397 | 0 | 5.573538 | 6.376686 | 2.414025 | 3.008511 | 3.413948 | 0.755451 | low  |
| TCGA-55- | 1.553425 | 0 | 5.623411 | 7.220081 | 1.949837 | 1.84941  | 2.786369 | 0.843224 | low  |
| TCGA-55- | 1.139726 | 0 | 6.961034 | 6.471799 | 3.559494 | 3.392109 | 4.587208 | 0.794998 | low  |

Supplementary Table 3. Risk scores for tumor samples in the validation set

| id       | futime   | fustat | FBP1     | LDHA     | MAFF     | PDGFB    | GPC3     | riskScore | risk |
|----------|----------|--------|----------|----------|----------|----------|----------|-----------|------|
| GSM16721 | 8.8      | 0      | 10.23664 | 13.11122 | 8.646784 | 6.884643 | 8.166213 | 4.325975  | low  |
| GSM16721 | 2.1      | 0      | 10.83464 | 12.89049 | 7.997888 | 6.883573 | 9.281536 | 2.861791  | low  |
| GSM16721 | 5.4      | 1      | 10.77148 | 13.39059 | 9.039159 | 6.641892 | 7.116905 | 5.137969  | low  |
| GSM16721 | 5.766667 | 0      | 11.83647 | 13.3319  | 9.147113 | 7.642683 | 8.849912 | 4.618899  | low  |
| GSM16721 | 2.825    | 1      | 10.68013 | 13.58215 | 10.30089 | 8.289862 | 8.09097  | 9.363013  | high |
| GSM16721 | 6.916667 | 0      | 11.74969 | 13.49703 | 8.647976 | 6.933517 | 8.050202 | 4.242839  | low  |
| GSM16721 | 5.766667 | 0      | 12.1164  | 13.46796 | 8.955215 | 7.044571 | 7.93124  | 4.363869  | low  |
| GSM16721 | 2.258333 | 0      | 11.79235 | 13.10019 | 9.298403 | 7.243354 | 8.727492 | 4.018988  | low  |
| GSM16721 | 0.483333 | 1      | 10.25709 | 13.50329 | 9.947683 | 6.729303 | 7.897023 | 6.654161  | high |
| GSM16721 | 4.183333 | 1      | 9.767272 | 12.97642 | 8.920777 | 7.104896 | 9.832979 | 4.162628  | low  |
| GSM16721 | 6.083333 | 0      | 11.86706 | 13.17559 | 9.047973 | 6.908714 | 8.298842 | 3.79858   | low  |
| GSM16721 | 2.9      | 1      | 11.10124 | 13.53598 | 8.026369 | 6.857812 | 8.273469 | 4.043206  | low  |
| GSM16721 | 2.3      | 1      | 10.08363 | 13.38624 | 9.977208 | 7.063604 | 8.116432 | 6.82192   | high |
| GSM16721 | 4.066667 | 1      | 10.4335  | 13.1349  | 8.537721 | 7.568422 | 9.881555 | 4.116748  | low  |
| GSM16721 | 5.55     | 0      | 9.970509 | 14.00822 | 9.075898 | 7.128015 | 8.412718 | 7.606331  | high |
| GSM16721 | 0.841667 | 1      | 9.962753 | 14.29485 | 9.020055 | 6.345003 | 7.905182 | 7.674102  | high |
| GSM16721 | 0.725    | 1      | 9.611065 | 13.87019 | 9.547438 | 7.087655 | 6.550714 | 9.612268  | high |
| GSM16721 | 5.1      | 1      | 11.58099 | 13.79167 | 9.033303 | 6.809187 | 7.646271 | 5.4306    | low  |
| GSM16721 | 11.01667 | 0      | 9.232723 | 13.97437 | 9.472688 | 6.433875 | 6.432899 | 9.297286  | high |
| GSM16721 | 10.73333 | 1      | 10.62038 | 13.97768 | 8.635259 | 6.199078 | 9.475034 | 4.744263  | low  |
| GSM16721 | 3.65     | 1      | 11.7598  | 13.20908 | 8.469324 | 6.533501 | 8.335645 | 3.225768  | low  |
| GSM16721 | 0.491667 | 1      | 9.534455 | 13.82287 | 9.188562 | 6.796346 | 7.899315 | 7.43775   | high |
| GSM16721 | 0.2      | 1      | 10.33134 | 14.39411 | 9.934056 | 6.463413 | 8.166705 | 9.165373  | high |
| GSM16721 | 1.466667 | 1      | 10.24659 | 13.71347 | 8.356333 | 6.812329 | 7.411697 | 5.652432  | low  |
| GSM16721 | 1.358333 | 1      | 9.245051 | 14.03855 | 9.007505 | 7.310513 | 8.0329   | 9.044039  | high |
| GSM16721 | 2.466667 | 1      | 10.1193  | 13.77391 | 8.815279 | 6.038775 | 6.539528 | 5.992447  | high |
| GSM16721 | 6.766667 | 1      | 9.697913 | 13.5765  | 9.813667 | 6.318593 | 7.901929 | 6.683965  | high |
| GSM16721 | 4.916667 | 1      | 10.22308 | 13.31155 | 9.297134 | 6.853771 | 8.377558 | 5.285803  | low  |
| GSM16721 | 7.716667 | 1      | 9.680994 | 13.83898 | 8.949328 | 6.533442 | 7.611408 | 6.801326  | high |
| GSM16721 | 0.333333 | 1      | 8.867943 | 13.48531 | 9.597351 | 6.835623 | 7.694421 | 7.801046  | high |
| GSM16721 | 1.4      | 1      | 12.38898 | 13.63615 | 8.424    | 6.586265 | 7.994054 | 3.699283  | low  |
| GSM16721 | 5.166667 | 0      | 10.40729 | 13.65673 | 8.964142 | 6.664111 | 9.511925 | 4.931042  | low  |
| GSM16721 | 5.191667 | 1      | 11.27802 | 13.22738 | 8.43859  | 6.673934 | 6.827933 | 4.05353   | low  |
| GSM16721 | 5.983333 | 0      | 10.09604 | 13.49987 | 9.521168 | 7.11462  | 8.024347 | 6.666838  | high |
| GSM16721 | 7        | 0      | 9.258778 | 13.87002 | 8.976086 | 6.68813  | 11.60443 | 5.399106  | low  |
| GSM16721 | 1.55     | 1      | 11.18161 | 13.15343 | 9.798458 | 7.087861 | 9.245945 | 4.608856  | low  |
| GSM16721 | 3.816667 | 1      | 12.57888 | 14.54573 | 8.840189 | 6.766672 | 8.950075 | 5.680327  | low  |
| GSM16721 | 1.716667 | 1      | 9.189657 | 13.58856 | 9.310237 | 6.540466 | 7.710786 | 6.942651  | high |
| GSM16721 | 9.208333 | 0      | 10.68718 | 13.49957 | 9.015164 | 6.284437 | 7.59963  | 4.861505  | low  |
| GSM16721 | 11.13333 | 0      | 11.50863 | 13.57631 | 8.917004 | 6.444939 | 8.342706 | 4.253128  | low  |
| GSM16721 | 5.875    | 1      | 10.35576 | 13.36216 | 8.605824 | 6.736999 | 7.939773 | 4.686492  | low  |
| GSM16721 | 4.341667 | 0      | 10.96967 | 13.05588 | 9.560924 | 6.012553 | 10.67871 | 3.090766  | low  |
| GSM16721 | 1.466667 | 1      | 10.64392 | 13.59453 | 8.471417 | 6.613888 | 8.075832 | 4.697664  | low  |
| GSM16721 | 1.408333 | 1      | 10.83351 | 13.463   | 9.253272 | 6.658953 | 7.132793 | 5.507481  | low  |
| GSM16721 | 7.233333 | 0      | 11.13842 | 13.60495 | 9.399261 | 6.906341 | 8.469011 | 5.430283  | low  |
| GSM16721 | 8.616667 | 0      | 9.652825 | 13.44928 | 8.701897 | 5.786457 | 8.019702 | 4.518314  | low  |
| GSM16721 | 9.8      | 0      | 10.87393 | 13.75174 | 9.545243 | 6.131628 | 7.304584 | 5.881137  | high |
| GSM16721 | 9.65     | 1      | 10.61884 | 13.77977 | 9.348066 | 6.104501 | 7.257888 | 5.930988  | high |
| GSM16721 | 1.583333 | 1      | 11.38853 | 13.46235 | 9.913167 | 6.173554 | 8.507585 | 4.683895  | low  |
| GSM16721 | 7.008333 | 1      | 11.00076 | 13.29868 | 8.57861  | 6.62501  | 6.781229 | 4.456878  | low  |
| GSM16721 | 12.775   | 0      | 9.379298 | 12.98927 | 9.482085 | 6.618116 | 9.720364 | 4.539379  | low  |
| GSM16721 | 12.825   | 0      | 9.838244 | 13.71252 | 9.501845 | 6.540139 | 8.493599 | 6.508681  | high |
| GSM16721 | 13.55    | 0      | 11.0913  | 13.42832 | 9.827883 | 6.540254 | 9.816036 | 4.549956  | low  |
| GSM16721 | 5.316667 | 0      | 10.87523 | 13.79455 | 8.920596 | 6.564537 | 7.677889 | 5.586294  | low  |

|          |          |   |          |          |          |          |          |          |      |
|----------|----------|---|----------|----------|----------|----------|----------|----------|------|
| GSM1672: | 11.04167 | 1 | 10.30951 | 13.5432  | 8.369004 | 6.406476 | 7.950113 | 4.572976 | low  |
| GSM1672: | 10.9     | 0 | 9.790373 | 13.66995 | 10.05715 | 6.209516 | 7.668275 | 7.217849 | high |
| GSM1672: | 13.3     | 0 | 10.24166 | 13.9239  | 8.525141 | 6.43438  | 7.277604 | 6.04659  | high |
| GSM1672: | 13.14167 | 0 | 11.48404 | 13.75048 | 9.66512  | 6.503652 | 7.339405 | 5.924571 | high |
| GSM1672: | 6.358333 | 0 | 9.363732 | 13.13323 | 9.763088 | 6.576229 | 7.481129 | 6.17818  | high |
| GSM1672: | 8.825    | 0 | 10.81048 | 13.64576 | 9.943385 | 6.68832  | 7.277734 | 6.858339 | high |
| GSM1672: | 2.35     | 1 | 9.310558 | 14.0167  | 9.662096 | 7.428707 | 7.720107 | 10.63833 | high |
| GSM1672: | 0.6      | 1 | 12.61921 | 14.53855 | 8.89281  | 6.897091 | 8.85079  | 5.888675 | high |
| GSM1672: | 6.625    | 1 | 10.29763 | 14.09823 | 9.473477 | 7.022064 | 7.484767 | 8.685309 | high |
| GSM1672: | 6.858333 | 0 | 11.0007  | 13.39087 | 8.798332 | 6.180994 | 8.014489 | 4.001707 | low  |
| GSM1672: | 8.433333 | 0 | 9.824849 | 13.66238 | 8.605931 | 6.634566 | 7.83576  | 5.739192 | low  |
| GSM1672: | 14.00833 | 0 | 8.356338 | 13.74776 | 9.6649   | 6.338124 | 8.578192 | 8.059386 | high |
| GSM1672: | 1.241667 | 1 | 10.07755 | 13.97031 | 9.057821 | 6.652031 | 7.560944 | 7.174155 | high |
| GSM1672: | 0.8      | 1 | 11.42364 | 13.42418 | 9.33035  | 6.947088 | 7.891583 | 5.011439 | low  |
| GSM1672: | 7.916667 | 0 | 10.18651 | 13.53769 | 8.936528 | 6.294929 | 8.981813 | 4.657944 | low  |
| GSM1672: | 5.2      | 0 | 9.548263 | 13.40922 | 9.566558 | 6.974933 | 7.248696 | 7.254177 | high |
| GSM1672: | 5.358333 | 0 | 10.6429  | 13.42549 | 9.095028 | 6.762051 | 5.572232 | 6.287783 | high |
| GSM1672: | 1.741667 | 1 | 11.55131 | 13.62879 | 8.522833 | 6.723227 | 7.979991 | 4.363022 | low  |
| GSM1672: | 1.858333 | 1 | 9.633836 | 13.78137 | 9.654351 | 6.801796 | 7.498753 | 8.183637 | high |
| GSM1672: | 5.658333 | 1 | 11.40926 | 13.82303 | 8.510392 | 6.81843  | 8.320245 | 4.807783 | low  |
| GSM1672: | 3.025    | 0 | 9.826957 | 13.5652  | 9.027502 | 7.039274 | 7.39315  | 6.723765 | high |
| GSM1672: | 1.891667 | 1 | 10.29361 | 14.09431 | 9.32478  | 6.106198 | 10.06206 | 5.623835 | low  |
| GSM1672: | 2.741667 | 0 | 11.10679 | 13.66247 | 8.822227 | 6.190136 | 7.418122 | 4.730989 | low  |
| GSM1672: | 3.175    | 0 | 10.10106 | 13.64471 | 8.885292 | 5.842692 | 7.47209  | 5.097461 | low  |
| GSM1672: | 4.516667 | 1 | 11.44769 | 13.73706 | 8.860837 | 6.359652 | 10.90996 | 3.604541 | low  |
| GSM1672: | 8.008333 | 1 | 11.16404 | 13.578   | 9.096929 | 7.099415 | 9.549228 | 4.764917 | low  |
| GSM1672: | 4.433333 | 0 | 10.98504 | 13.49927 | 9.251226 | 6.087459 | 9.431069 | 4.013944 | low  |
| GSM1672: | 1.041667 | 1 | 11.35247 | 13.50576 | 7.710641 | 6.045422 | 6.289012 | 3.638201 | low  |
| GSM1672: | 2.458333 | 0 | 10.31094 | 13.58159 | 10.27902 | 6.640451 | 7.249588 | 7.597025 | high |
| GSM1672: | 8.958333 | 0 | 11.88741 | 13.98265 | 9.111471 | 6.811631 | 7.484082 | 5.847756 | high |
| GSM1672: | 4.475    | 0 | 9.054862 | 13.54488 | 8.857846 | 7.001636 | 7.986326 | 6.783984 | high |
| GSM1672: | 1.816667 | 0 | 10.71536 | 13.7892  | 8.807994 | 6.773563 | 8.035184 | 5.636676 | low  |
| GSM1672: | 4.65     | 0 | 11.09585 | 13.65928 | 9.424411 | 6.900535 | 8.051753 | 5.828158 | low  |
| GSM1672: | 1.75     | 1 | 9.43346  | 14.05322 | 9.763756 | 6.856435 | 7.255699 | 10.07011 | high |
| GSM1672: | 0.608333 | 1 | 10.75507 | 13.62651 | 10.78391 | 6.872956 | 8.902025 | 7.323332 | high |
| GSM1672: | 13.325   | 0 | 10.10809 | 13.31417 | 8.815784 | 6.93275  | 7.095218 | 5.538069 | low  |
| GSM1672: | 5.066667 | 0 | 11.04129 | 13.46829 | 9.141139 | 6.66065  | 9.424044 | 4.307703 | low  |
| GSM1672: | 1.766667 | 1 | 10.8709  | 13.51427 | 8.95551  | 6.338065 | 8.656486 | 4.349327 | low  |
| GSM1672: | 4.466667 | 0 | 10.34351 | 13.17686 | 9.28541  | 6.092368 | 8.969873 | 3.977811 | low  |
| GSM1672: | 1.933333 | 0 | 10.19922 | 13.50784 | 8.600482 | 6.72895  | 7.921668 | 5.119168 | low  |
| GSM1672: | 3.939167 | 0 | 11.57482 | 13.73855 | 9.240432 | 6.309562 | 7.132279 | 5.22964  | low  |
| GSM1672: | 4.925833 | 1 | 10.34712 | 13.89125 | 9.117411 | 6.351663 | 6.743717 | 6.803703 | high |
| GSM1672: | 4.298333 | 0 | 10.7134  | 13.99182 | 8.077641 | 6.727052 | 6.447091 | 6.066925 | high |
| GSM1672: | 3.020833 | 1 | 10.58077 | 13.54841 | 8.253117 | 6.593149 | 7.799346 | 4.52949  | low  |
| GSM1672: | 0.55     | 1 | 11.09463 | 13.52992 | 9.296853 | 7.301487 | 7.500834 | 6.07991  | high |
| GSM1672: | 4.5775   | 1 | 9.315881 | 14.02991 | 9.245603 | 6.518323 | 7.856861 | 8.106728 | high |
| GSM1672: | 0.811667 | 1 | 10.13923 | 13.02138 | 9.905838 | 6.720839 | 9.325775 | 4.74951  | low  |
| GSM1672: | 4.906667 | 0 | 11.61065 | 13.47634 | 8.830006 | 6.603075 | 9.294988 | 3.74201  | low  |
| GSM1672: | 4.3175   | 0 | 9.879076 | 14.17776 | 9.568671 | 6.249565 | 6.887355 | 8.795335 | high |
| GSM1672: | 1.79     | 1 | 10.93424 | 12.90593 | 9.417367 | 6.514308 | 7.749568 | 4.001607 | low  |
| GSM1672: | 0.531667 | 1 | 10.39078 | 13.54764 | 9.670546 | 6.735839 | 8.487313 | 5.999102 | high |
| GSM1672: | 5.750833 | 1 | 10.19377 | 13.61503 | 9.389892 | 6.48572  | 6.954976 | 6.525816 | high |
| GSM1672: | 5.345    | 0 | 10.66403 | 13.40332 | 9.128082 | 6.764122 | 10.13928 | 4.226467 | low  |
| GSM1672: | 2.686667 | 1 | 12.1401  | 13.42369 | 8.671368 | 5.94478  | 7.196951 | 3.441541 | low  |
| GSM1672: | 0        | 0 | 9.195399 | 13.73867 | 9.737639 | 6.862909 | 6.812973 | 9.327445 | high |
| GSM1672: | 4.695833 | 0 | 13.01347 | 13.52853 | 9.599295 | 6.662137 | 6.231636 | 4.812245 | low  |

|          |          |   |          |          |          |          |          |          |      |
|----------|----------|---|----------|----------|----------|----------|----------|----------|------|
| GSM1672: | 5.754167 | 0 | 9.683379 | 13.59148 | 8.602634 | 6.714642 | 8.841492 | 5.281355 | low  |
| GSM1672: | 4.693333 | 0 | 12.19222 | 13.92229 | 9.253852 | 6.466861 | 7.466725 | 5.237548 | low  |
| GSM1672: | 5.104167 | 0 | 9.261456 | 13.85147 | 8.183017 | 6.420163 | 7.752775 | 6.015944 | high |
| GSM1672: | 4.2025   | 0 | 11.7264  | 13.12567 | 8.482328 | 6.750683 | 9.319796 | 3.002038 | low  |
| GSM1672: | 6.113333 | 0 | 9.906963 | 13.47193 | 8.851829 | 6.820375 | 7.697496 | 5.73309  | low  |
| GSM1672: | 5.561667 | 0 | 10.98216 | 13.35732 | 8.701033 | 7.106227 | 8.996654 | 4.284638 | low  |
| GSM1672: | 6.066667 | 0 | 10.65832 | 13.7476  | 8.514197 | 7.08638  | 7.135289 | 6.042763 | high |
| GSM1672: | 1.658333 | 1 | 11.24861 | 13.03294 | 9.88307  | 6.664809 | 9.217509 | 4.04676  | low  |
| GSM1672: | 2.606667 | 1 | 11.22576 | 13.94626 | 9.373345 | 6.579931 | 7.096135 | 6.57748  | high |
| GSM1672: | 3.7775   | 1 | 11.23562 | 13.2132  | 8.974541 | 6.26503  | 6.984908 | 4.102737 | low  |
| GSM1672: | 6.995833 | 0 | 10.56245 | 13.8818  | 9.332188 | 6.601871 | 7.072342 | 7.009033 | high |
| GSM1672: | 1.0525   | 1 | 10.64683 | 13.89941 | 8.436095 | 7.247592 | 7.611003 | 6.33513  | high |
| GSM1672: | 6.490833 | 0 | 10.66509 | 13.38664 | 8.644316 | 7.409518 | 8.248132 | 5.089681 | low  |
| GSM1672: | 0.931667 | 0 | 9.095845 | 13.79578 | 9.598555 | 6.353108 | 8.096246 | 7.643868 | high |
| GSM1672: | 2.544167 | 0 | 10.78283 | 13.34841 | 9.078145 | 7.439762 | 9.433919 | 4.876142 | low  |
| GSM1672: | 6.1325   | 0 | 10.51316 | 13.0641  | 8.734423 | 7.052467 | 8.794864 | 4.057708 | low  |
| GSM1672: | 0.973333 | 1 | 10.07097 | 13.65093 | 10.03189 | 7.578982 | 9.137988 | 7.925612 | high |
| GSM1672: | 6.2175   | 0 | 8.194166 | 13.85151 | 9.626494 | 7.700281 | 11.42288 | 8.832654 | high |
| GSM1672: | 2.661667 | 1 | 11.64015 | 12.94139 | 9.459748 | 6.829772 | 9.461025 | 3.410324 | low  |
| GSM1672: | 0.186667 | 1 | 10.87902 | 13.49049 | 9.62743  | 7.49495  | 7.753932 | 6.693013 | high |
| GSM1672: | 0.7375   | 1 | 8.109455 | 13.8784  | 9.844497 | 6.942241 | 7.077307 | 11.7927  | high |
| GSM1672: | 7.683333 | 0 | 10.02029 | 13.32853 | 10.10978 | 7.015652 | 8.873401 | 6.391049 | high |
| GSM1672: | 7.505833 | 0 | 10.39709 | 13.6769  | 10.28645 | 8.015727 | 8.557693 | 9.237855 | high |
| GSM1672: | 2.080833 | 1 | 9.880049 | 14.33752 | 8.950244 | 7.077262 | 7.869285 | 9.066449 | high |
| GSM1672: | 3.503333 | 1 | 10.84968 | 13.15193 | 8.395538 | 5.957874 | 7.760567 | 3.30287  | low  |
| GSM1672: | 1.016667 | 1 | 9.546487 | 14.02453 | 9.952484 | 7.542638 | 6.852324 | 12.05657 | high |
| GSM1672: | 0.225    | 1 | 10.47591 | 13.78316 | 8.640042 | 7.084215 | 7.704388 | 6.156191 | high |
| GSM1672: | 8        | 1 | 9.491222 | 13.70985 | 9.863025 | 6.822207 | 7.81405  | 8.237055 | high |
| GSM1672: | 5.508333 | 1 | 10.29247 | 13.68138 | 8.878227 | 6.373564 | 6.702214 | 5.981521 | high |
| GSM1672: | 5.716667 | 1 | 12.50527 | 13.7547  | 8.683295 | 6.604808 | 7.558926 | 4.216564 | low  |
| GSM1672: | 4        | 1 | 9.402217 | 14.1596  | 9.342117 | 6.578752 | 7.602795 | 8.963616 | high |
| GSM1672: | 1.333333 | 1 | 9.713715 | 14.1663  | 8.581991 | 6.751339 | 6.818889 | 8.171095 | high |
| GSM1672: | 6        | 0 | 8.544605 | 13.23076 | 9.394057 | 7.231624 | 6.508952 | 8.358346 | high |
| GSM1672: | 3.916667 | 0 | 10.69058 | 13.00584 | 9.915607 | 7.642129 | 8.950894 | 5.418887 | low  |
| GSM1672: | 4.333333 | 1 | 13.12604 | 13.29054 | 9.99278  | 7.307444 | 8.692246 | 4.232113 | low  |
| GSM1672: | 3.25     | 1 | 9.15496  | 13.43472 | 9.180347 | 6.932043 | 5.709357 | 8.128476 | high |
| GSM1672: | 5.5      | 0 | 10.66035 | 13.13135 | 9.361725 | 7.289216 | 10.06554 | 4.370396 | low  |
| GSM1672: | 3.666667 | 0 | 11.01766 | 13.46777 | 9.405143 | 7.323162 | 8.577421 | 5.591877 | low  |
| GSM1672: | 5.833333 | 0 | 10.45672 | 12.94044 | 9.84327  | 7.23721  | 7.369658 | 5.659588 | low  |
| GSM1672: | 6.25     | 0 | 11.51286 | 13.62614 | 9.004263 | 6.964022 | 8.270991 | 4.939501 | low  |
| GSM1672: | 7.666667 | 0 | 11.78731 | 13.44324 | 9.824863 | 7.38661  | 8.066654 | 5.699728 | low  |
| GSM1672: | 5.416667 | 0 | 10.77529 | 14.43504 | 8.40937  | 6.556544 | 9.819681 | 5.706542 | low  |
| GSM1672: | 3.583333 | 0 | 8.461721 | 13.86459 | 8.924364 | 6.580423 | 7.388655 | 8.390008 | high |
| GSM1672: | 5.75     | 0 | 8.670589 | 13.96886 | 9.683291 | 7.338638 | 7.459473 | 11.50459 | high |
| GSM1672: | 3.333333 | 1 | 12.19213 | 13.69954 | 9.548    | 6.684444 | 7.632217 | 5.164115 | low  |
| GSM1672: | 1.75     | 1 | 10.79569 | 13.78795 | 9.023817 | 6.110148 | 8.121186 | 5.056756 | low  |
| GSM1672: | 2.416667 | 1 | 10.17521 | 13.61881 | 8.918337 | 7.340451 | 7.14176  | 6.959792 | high |
| GSM1672: | 2.166667 | 1 | 10.22607 | 13.3895  | 9.22584  | 6.96058  | 8.730497 | 5.350763 | low  |
| GSM1672: | 6.416667 | 0 | 8.028094 | 14.26086 | 9.958566 | 7.017146 | 6.809414 | 15.11745 | high |
| GSM1672: | 0.166667 | 1 | 9.163675 | 14.21678 | 9.01463  | 6.825177 | 6.739619 | 10.08466 | high |
| GSM1672: | 5.5      | 0 | 10.7098  | 13.50865 | 9.79887  | 6.709923 | 8.974165 | 5.511655 | low  |
| GSM1672: | 1.166667 | 1 | 9.421417 | 14.24372 | 9.23135  | 7.311598 | 7.928027 | 10.23018 | high |
| GSM1672: | 2.75     | 0 | 10.28023 | 13.02762 | 10.73325 | 7.763131 | 9.058717 | 6.943283 | high |
| GSM1672: | 7.083333 | 0 | 8.558264 | 14.22037 | 9.673936 | 6.575887 | 7.629349 | 11.08747 | high |
| GSM1672: | 5.5      | 0 | 10.56797 | 13.3885  | 8.289839 | 7.703421 | 7.498841 | 5.439354 | low  |
| GSM1672: | 1.25     | 0 | 11.38266 | 13.22138 | 9.314609 | 6.74245  | 6.436885 | 4.977168 | low  |



|                      |          |   |          |          |          |          |          |          |      |
|----------------------|----------|---|----------|----------|----------|----------|----------|----------|------|
| GSM1672 <sup>4</sup> | 7.583333 | 0 | 10.26952 | 13.98355 | 9.177295 | 7.044116 | 6.450797 | 8.553913 | high |
| GSM1672 <sup>4</sup> | 5.666667 | 1 | 11.71854 | 13.30081 | 9.196608 | 7.499046 | 7.99749  | 4.889085 | low  |
| GSM1672 <sup>4</sup> | 2.75     | 0 | 9.405601 | 13.28882 | 9.675517 | 7.11932  | 8.400303 | 6.677426 | high |
| GSM1672 <sup>4</sup> | 2        | 1 | 10.52925 | 13.70035 | 9.093843 | 7.627714 | 8.97113  | 6.442195 | high |
| GSM1672 <sup>4</sup> | 5.166667 | 0 | 11.30457 | 13.48629 | 9.232204 | 6.77164  | 8.145132 | 4.859388 | low  |
| GSM1672 <sup>4</sup> | 9.5      | 1 | 10.7287  | 14.4924  | 9.538339 | 6.999324 | 7.293748 | 10.03427 | high |
| GSM1672 <sup>4</sup> | 0.333333 | 1 | 11.92496 | 13.70661 | 9.552733 | 7.037358 | 8.239799 | 5.488485 | low  |
| GSM1672 <sup>4</sup> | 1.666667 | 1 | 10.24017 | 13.39123 | 10.27605 | 6.536381 | 7.832681 | 6.547197 | high |
| GSM1672 <sup>4</sup> | 4.333333 | 1 | 9.910367 | 13.62228 | 10.25755 | 7.213979 | 6.059706 | 10.13454 | high |
| GSM1672 <sup>4</sup> | 7.75     | 0 | 8.662992 | 13.90869 | 9.735669 | 6.983619 | 7.264733 | 10.72383 | high |
| GSM1672 <sup>4</sup> | 1.166667 | 1 | 9.825437 | 13.87944 | 8.936214 | 7.202806 | 7.878701 | 7.562112 | high |
| GSM1672 <sup>4</sup> | 8.333333 | 0 | 10.85361 | 13.47738 | 9.657683 | 7.382135 | 8.272821 | 6.282659 | high |
| GSM1672 <sup>4</sup> | 2.75     | 0 | 10.75181 | 13.44261 | 9.214636 | 6.841336 | 8.082804 | 5.236969 | low  |
| GSM1672 <sup>4</sup> | 2.666667 | 1 | 10.81336 | 13.1859  | 8.705159 | 7.359575 | 9.118347 | 4.226472 | low  |
| GSM1672 <sup>4</sup> | 5        | 0 | 11.70651 | 13.6525  | 8.961869 | 6.779154 | 8.781101 | 4.448386 | low  |
| GSM1672 <sup>4</sup> | 4.166667 | 0 | 11.29758 | 13.93842 | 9.447734 | 7.465848 | 7.324595 | 7.706014 | high |
| GSM1672 <sup>4</sup> | 1.25     | 1 | 10.02752 | 13.64511 | 9.121637 | 6.896911 | 7.790974 | 6.488795 | high |
| GSM1672 <sup>4</sup> | 3.083333 | 0 | 10.49067 | 13.4133  | 9.190163 | 7.02172  | 9.747466 | 4.798188 | low  |
| GSM1672 <sup>4</sup> | 4.5      | 0 | 11.15596 | 13.13204 | 9.932012 | 7.043704 | 8.654461 | 4.905994 | low  |
| GSM1672 <sup>4</sup> | 2.583333 | 0 | 10.97264 | 12.8957  | 8.126983 | 7.38663  | 9.592066 | 3.107534 | low  |
| GSM1672 <sup>4</sup> | 3.166667 | 0 | 9.404316 | 13.76542 | 8.484563 | 6.889538 | 8.747324 | 6.070574 | high |
| GSM1672 <sup>4</sup> | 9.583333 | 0 | 10.41059 | 12.73242 | 9.088853 | 7.113853 | 13.02367 | 2.675293 | low  |
| GSM1672 <sup>4</sup> | 3        | 0 | 11.87996 | 13.08655 | 9.402032 | 7.196711 | 8.09593  | 4.21132  | low  |
| GSM1672 <sup>4</sup> | 4        | 1 | 11.43288 | 12.83763 | 10.64298 | 6.788006 | 9.071259 | 4.355124 | low  |
| GSM1672 <sup>4</sup> | 1.583333 | 1 | 10.95396 | 13.50348 | 8.963525 | 6.954583 | 8.596507 | 4.869481 | low  |
| GSM1672 <sup>4</sup> | 7.583333 | 0 | 10.17939 | 13.67032 | 9.776331 | 7.346018 | 8.47656  | 7.555739 | high |
| GSM1672 <sup>4</sup> | 17       | 1 | 9.425434 | 13.63572 | 9.757093 | 6.806795 | 7.745338 | 7.889342 | high |
| GSM1672 <sup>4</sup> | 4.166667 | 0 | 10.96851 | 13.99967 | 8.607066 | 6.718207 | 7.889924 | 5.759664 | low  |
| GSM1672 <sup>4</sup> | 6.666667 | 0 | 10.19383 | 13.49061 | 8.924214 | 6.715632 | 7.108326 | 5.799745 | low  |
| GSM1672 <sup>4</sup> | 3.5      | 1 | 10.88886 | 13.46182 | 8.632065 | 6.887212 | 9.637377 | 4.071606 | low  |
| GSM1672 <sup>4</sup> | 5        | 0 | 9.529106 | 14.65644 | 7.770085 | 6.769531 | 9.649148 | 7.03425  | high |
| GSM1672 <sup>4</sup> | 2.166667 | 0 | 10.62125 | 13.9356  | 9.348613 | 7.228455 | 7.092091 | 8.086718 | high |
| GSM1672 <sup>4</sup> | 5.166667 | 1 | 10.66076 | 13.5072  | 9.217941 | 6.985932 | 6.551128 | 6.418499 | high |
| GSM1672 <sup>4</sup> | 1.833333 | 0 | 7.431055 | 12.74805 | 9.588744 | 7.406949 | 9.23425  | 6.696003 | high |
| GSM1672 <sup>4</sup> | 5.25     | 0 | 11.85485 | 13.48286 | 9.831234 | 6.789059 | 8.980288 | 4.724251 | low  |
| GSM1672 <sup>4</sup> | 5.666667 | 0 | 10.81913 | 12.74618 | 8.500035 | 7.124281 | 8.658476 | 3.285468 | low  |
| GSM1672 <sup>4</sup> | 0.583333 | 0 | 10.84554 | 13.88093 | 9.521638 | 7.132533 | 8.115673 | 7.105578 | high |
| GSM1672 <sup>4</sup> | 4.333333 | 1 | 10.66205 | 12.88231 | 9.106962 | 6.870133 | 8.261009 | 3.973973 | low  |
| GSM1672 <sup>4</sup> | 3        | 0 | 10.68764 | 12.99961 | 9.004187 | 7.002897 | 9.051709 | 3.928355 | low  |
| GSM1672 <sup>4</sup> | 1.25     | 1 | 9.872025 | 13.49026 | 9.056947 | 6.982961 | 7.80013  | 6.199961 | high |
| GSM1672 <sup>4</sup> | 1.666667 | 1 | 12.009   | 13.50587 | 8.791531 | 6.413375 | 6.584746 | 4.317182 | low  |
| GSM1672 <sup>4</sup> | 3.416667 | 0 | 9.975963 | 13.03908 | 9.879164 | 7.333301 | 8.724991 | 5.800476 | low  |
| GSM1672 <sup>4</sup> | 2.083333 | 1 | 10.5195  | 13.51838 | 8.984601 | 6.649817 | 8.080327 | 5.153509 | low  |
| GSM1672 <sup>4</sup> | 3.5      | 0 | 9.844789 | 13.30869 | 9.306912 | 6.771833 | 7.826548 | 5.758631 | low  |
| GSM1672 <sup>4</sup> | 4.25     | 1 | 11.41864 | 13.55379 | 8.701298 | 7.50352  | 9.002326 | 4.767154 | low  |
| GSM1672 <sup>4</sup> | 4.166667 | 0 | 9.218217 | 13.5401  | 9.148339 | 7.042988 | 7.501805 | 7.367098 | high |
| GSM1672 <sup>4</sup> | 4.75     | 1 | 9.794305 | 13.287   | 9.949663 | 7.193942 | 10.03382 | 5.884122 | high |
| GSM1672 <sup>4</sup> | 1.083333 | 1 | 9.597846 | 13.74543 | 8.441336 | 7.125145 | 7.35086  | 6.851494 | high |
| GSM1672 <sup>4</sup> | 6.5      | 1 | 9.837797 | 13.75956 | 8.457272 | 7.269173 | 7.684707 | 6.685559 | high |
| GSM1672 <sup>4</sup> | 4        | 0 | 10.92575 | 12.74525 | 9.301541 | 6.570791 | 7.818192 | 3.655222 | low  |
| GSM1672 <sup>4</sup> | 2.75     | 1 | 11.46172 | 13.31497 | 9.641666 | 7.186222 | 9.478612 | 4.619936 | low  |
| GSM1672 <sup>4</sup> | 3.083333 | 0 | 10.51283 | 12.5022  | 9.98498  | 7.760654 | 10.98171 | 3.847407 | low  |
| GSM1672 <sup>4</sup> | 1.416667 | 1 | 10.24067 | 13.79224 | 9.954353 | 7.381325 | 8.406779 | 8.317535 | high |
| GSM1672 <sup>4</sup> | 2        | 1 | 9.764671 | 13.57387 | 8.863111 | 7.294126 | 6.54147  | 7.458609 | high |
| GSM1672 <sup>4</sup> | 3.666667 | 0 | 11.45277 | 13.54035 | 8.35764  | 6.814872 | 8.859479 | 3.882313 | low  |
| GSM1672 <sup>4</sup> | 2.5      | 0 | 10.71009 | 13.80342 | 9.475599 | 7.081332 | 8.180009 | 6.818661 | high |

|                   |   |          |          |          |          |          |          |      |
|-------------------|---|----------|----------|----------|----------|----------|----------|------|
| GSM1672: 4.166667 | 0 | 11.65523 | 13.73671 | 9.833926 | 8.34709  | 8.254438 | 7.939304 | high |
| GSM1672: 7.333333 | 0 | 9.829068 | 13.87495 | 8.751788 | 6.822305 | 9.540909 | 5.843002 | high |
| GSM1672: 3.5      | 0 | 11.39339 | 13.40668 | 9.496696 | 8.034519 | 8.969493 | 5.848657 | high |
| GSM1672: 3.833333 | 0 | 11.23118 | 13.32418 | 9.396176 | 7.085475 | 7.842174 | 5.146818 | low  |
| GSM1672: 4.666667 | 0 | 11.07661 | 12.75691 | 9.354037 | 7.032805 | 10.21369 | 3.246454 | low  |
| GSM1672: 3.333333 | 0 | 12.24782 | 12.79101 | 8.397506 | 6.95814  | 9.650982 | 2.379005 | low  |
| GSM1672: 3.166667 | 0 | 11.38901 | 13.98352 | 8.776696 | 6.98404  | 8.221075 | 5.708604 | low  |
| GSM1672: 3.583333 | 0 | 9.333759 | 14.23835 | 9.463519 | 6.58523  | 7.466244 | 9.743123 | high |
| GSM1672: 4.583333 | 0 | 9.408977 | 13.3335  | 9.428134 | 7.612965 | 8.944618 | 6.828367 | high |
| GSM1672: 1.416667 | 1 | 11.71576 | 13.96259 | 9.036459 | 7.104013 | 7.694191 | 6.090603 | high |
| GSM1672: 3        | 0 | 10.57874 | 13.34202 | 10.63132 | 7.556898 | 8.541538 | 7.555383 | high |
| GSM1672: 0.833333 | 1 | 10.15898 | 13.52977 | 8.996692 | 7.352891 | 10.02849 | 5.325747 | low  |
| GSM1672: 1.916667 | 1 | 9.423696 | 14.40667 | 8.423358 | 7.064486 | 8.125238 | 8.771724 | high |
| GSM1672: 5.166667 | 0 | 8.701026 | 13.61605 | 8.867354 | 7.327908 | 7.996276 | 7.878972 | high |
| GSM1672: 7.083333 | 0 | 10.1121  | 12.69134 | 9.078971 | 6.860292 | 9.452132 | 3.529469 | low  |
| GSM1672: 3.916667 | 1 | 8.996982 | 13.71111 | 10.66205 | 7.639034 | 7.589876 | 12.46245 | high |
| GSM1672: 4        | 1 | 10.83218 | 13.28705 | 9.607374 | 7.058104 | 8.325278 | 5.333646 | low  |
| GSM1672: 4.75     | 0 | 11.74177 | 13.59695 | 9.324985 | 6.97778  | 7.809974 | 5.246945 | low  |
| GSM1672: 3.583333 | 0 | 11.09126 | 13.06855 | 9.264091 | 7.477738 | 9.098308 | 4.415349 | low  |
| GSM1672: 3.416667 | 0 | 10.1032  | 12.70684 | 9.386267 | 7.646945 | 9.814554 | 4.294202 | low  |
| GSM1672: 3.583333 | 0 | 10.92568 | 12.69085 | 8.672851 | 7.040069 | 8.801996 | 3.17206  | low  |
| GSM1672: 2.666667 | 0 | 8.836884 | 13.03201 | 9.326753 | 7.536984 | 5.834858 | 8.126563 | high |
| GSM1672: 5.333333 | 0 | 11.15826 | 12.78731 | 8.973319 | 7.538116 | 9.374059 | 3.582995 | low  |
| GSM1672: 8.916667 | 0 | 12.72963 | 13.34423 | 9.114061 | 6.930394 | 8.864056 | 3.517672 | low  |
| GSM1672: 2.083333 | 1 | 12.16569 | 13.39977 | 8.636362 | 7.031788 | 8.981005 | 3.591178 | low  |
| GSM1672: 8        | 0 | 10.38849 | 13.76455 | 9.307362 | 7.570374 | 8.918416 | 7.018131 | high |
| GSM1672: 8.166667 | 0 | 10.64834 | 13.30786 | 9.158896 | 7.53506  | 8.965836 | 5.260828 | low  |
| GSM1672: 3.083333 | 1 | 11.43987 | 14.14156 | 9.048521 | 6.896455 | 9.183286 | 5.824497 | low  |
| GSM1672: 7.5      | 0 | 11.13974 | 13.29866 | 8.92161  | 8.137558 | 8.135873 | 5.637112 | low  |
| GSM1672: 3.333333 | 0 | 10.73217 | 13.50596 | 9.561196 | 7.020416 | 8.224629 | 5.935078 | high |
| GSM1672: 5.916667 | 1 | 12.55388 | 13.314   | 9.677739 | 7.345864 | 9.511055 | 4.095083 | low  |
| GSM1672: 0.75     | 1 | 11.1781  | 14.36357 | 8.563414 | 7.470195 | 8.722049 | 7.087596 | high |
| GSM1672: 9.166667 | 0 | 9.99291  | 13.60771 | 9.431092 | 7.006891 | 7.62511  | 7.071835 | high |
| GSM1672: 9.166667 | 0 | 10.63841 | 12.89084 | 9.213477 | 7.126527 | 9.795911 | 3.774305 | low  |
| GSM1672: 0.5      | 1 | 9.140096 | 14.51327 | 11.23142 | 7.372007 | 7.026025 | 19.69665 | high |
| GSM1672: 7.916667 | 1 | 10.62316 | 13.94021 | 9.716885 | 7.090928 | 7.904309 | 7.916888 | high |
| GSM1672: 3.166667 | 1 | 10.48316 | 13.66532 | 9.47039  | 7.319842 | 7.808913 | 7.149245 | high |
| GSM1672: 0.75     | 1 | 7.611401 | 14.31456 | 10.44315 | 7.752249 | 8.224677 | 18.59913 | high |
| GSM1672: 7.25     | 0 | 9.888393 | 14.55427 | 10.00258 | 7.928672 | 13.70484 | 8.887453 | high |
| GSM1672: 7.333333 | 0 | 11.38398 | 13.49629 | 9.674404 | 7.082604 | 8.02412  | 5.670924 | low  |
| GSM1672: 6.166667 | 0 | 12.51205 | 14.37282 | 8.788963 | 7.023406 | 8.359504 | 5.804262 | low  |
| GSM1672: 0.666667 | 1 | 9.198511 | 14.3438  | 10.79045 | 7.614459 | 8.336413 | 15.51495 | high |
| GSM1672: 4.916667 | 0 | 11.30775 | 13.24625 | 8.371088 | 7.001575 | 10.16587 | 3.222158 | low  |
| GSM1672: 4.583333 | 0 | 12.2652  | 13.64796 | 8.955303 | 6.893122 | 7.52621  | 4.661297 | low  |
| GSM1672: 3        | 0 | 10.11749 | 13.03409 | 8.596736 | 7.187623 | 8.629783 | 4.292979 | low  |
| GSM1672: 1.25     | 1 | 10.68624 | 13.24439 | 7.660984 | 7.709349 | 9.584621 | 3.694204 | low  |
| GSM1672: 7.083333 | 0 | 11.1311  | 14.57814 | 9.070067 | 6.804507 | 7.371289 | 8.569824 | high |
| GSM1672: 0.75     | 1 | 8.337778 | 14.39472 | 7.722671 | 7.072853 | 5.097935 | 11.49436 | high |
| GSM1672: 0.916667 | 1 | 9.540475 | 14.42326 | 9.309696 | 7.362109 | 6.610572 | 12.54704 | high |
| GSM1672: 6.583333 | 1 | 12.47333 | 13.11072 | 9.832258 | 7.195145 | 9.215654 | 3.873083 | low  |
| GSM1672: 8.75     | 0 | 12.17405 | 13.39797 | 9.091297 | 6.899351 | 9.130609 | 3.775496 | low  |
| GSM1672: 8.083333 | 0 | 8.260092 | 14.22919 | 9.334613 | 7.124705 | 4.363437 | 16.01773 | high |
| GSM1672: 0.333333 | 1 | 10.21203 | 14.18859 | 9.374267 | 7.551202 | 7.765488 | 9.748819 | high |
| GSM1672: 3        | 1 | 10.08144 | 14.06307 | 9.450069 | 6.847646 | 7.871363 | 8.197368 | high |
| GSM1672: 3.666667 | 1 | 10.61113 | 13.4163  | 8.954166 | 6.534581 | 10.43452 | 3.853157 | low  |
| GSM1672: 6.166667 | 1 | 12.1525  | 14.23705 | 8.63519  | 7.55249  | 7.800648 | 6.490098 | high |

|          |          |   |          |          |          |          |          |          |      |
|----------|----------|---|----------|----------|----------|----------|----------|----------|------|
| GSM1672: | 1.083333 | 1 | 9.478499 | 13.21228 | 8.414119 | 7.283133 | 9.630655 | 4.60529  | low  |
| GSM1672: | 7.5      | 0 | 10.20429 | 13.98806 | 9.009728 | 6.511627 | 7.743979 | 6.733739 | high |
| GSM1672: | 7.083333 | 0 | 10.99111 | 14.25918 | 8.729194 | 7.348681 | 8.264246 | 7.281557 | high |
| GSM1672: | 5.916667 | 1 | 11.1745  | 13.26788 | 8.327398 | 7.238336 | 7.414804 | 4.362974 | low  |
| GSM1672: | 5.333333 | 1 | 11.13096 | 14.07371 | 8.537385 | 7.290604 | 7.219933 | 6.816315 | high |
| GSM1672: | 5.416667 | 1 | 9.501286 | 13.06468 | 8.876066 | 7.545447 | 8.123258 | 5.641952 | low  |
| GSM1672: | 5.666667 | 0 | 10.2516  | 13.91148 | 9.594756 | 7.36665  | 7.662882 | 8.673053 | high |
| GSM1672: | 5.333333 | 0 | 10.61787 | 13.89109 | 9.998346 | 6.219314 | 8.50042  | 6.544371 | high |
| GSM1672: | 5.25     | 0 | 11.1731  | 13.37407 | 9.671392 | 7.76354  | 7.283977 | 6.740084 | high |
| GSM1672: | 1.083333 | 1 | 11.05511 | 13.32324 | 9.234698 | 7.436514 | 7.597673 | 5.594454 | low  |
| GSM1672: | 7.916667 | 0 | 9.33985  | 14.61468 | 8.809985 | 6.652474 | 7.025583 | 10.68395 | high |
| GSM1672: | 6.166667 | 0 | 11.30327 | 13.8923  | 8.958312 | 6.839386 | 6.537386 | 6.449805 | high |
| GSM1672: | 4.75     | 1 | 10.39539 | 13.11529 | 9.220156 | 7.614937 | 8.262076 | 5.454636 | low  |
| GSM1672: | 4.666667 | 1 | 11.84993 | 14.23393 | 9.304645 | 6.569041 | 8.197841 | 6.148669 | high |
| GSM1672: | 4        | 0 | 10.5789  | 13.96467 | 10.11136 | 6.275907 | 7.537141 | 7.648466 | high |
| GSM1672: | 4.083333 | 0 | 11.39568 | 13.62122 | 9.423014 | 7.001418 | 9.082628 | 5.123419 | low  |
| GSM1672: | 2.333333 | 0 | 12.06366 | 13.54208 | 9.20413  | 7.149356 | 6.697538 | 5.427801 | low  |
| GSM1672: | 3        | 0 | 10.57496 | 13.64664 | 8.833072 | 6.678931 | 8.389674 | 5.153246 | low  |
| GSM1672: | 3.333333 | 0 | 10.25099 | 13.89974 | 9.379116 | 7.082187 | 9.050611 | 6.930982 | high |
| GSM1672: | 3.083333 | 0 | 9.932256 | 14.04563 | 9.171462 | 7.23269  | 7.760906 | 8.563994 | high |
| GSM1672: | 3.333333 | 0 | 11.8265  | 13.28516 | 10.18856 | 6.987986 | 9.225767 | 4.74109  | low  |
| GSM1672: | 1.916667 | 1 | 11.5663  | 13.6331  | 9.818621 | 7.329281 | 9.078519 | 5.812842 | low  |
| GSM1672: | 6.333333 | 0 | 10.47671 | 13.52338 | 9.967379 | 7.522309 | 7.505097 | 7.91573  | high |
| GSM1672: | 2.833333 | 1 | 12.13321 | 13.71696 | 9.583    | 7.557787 | 8.409976 | 5.888368 | high |
| GSM1672: | 5.5      | 0 | 12.90515 | 13.66615 | 10.04632 | 7.64452  | 7.524871 | 6.203545 | high |
| GSM1672: | 2.416667 | 1 | 9.420967 | 14.51495 | 9.941646 | 7.232283 | 10.66304 | 10.40959 | high |
| GSM1672: | 0.583333 | 1 | 7.652135 | 13.92556 | 8.871645 | 6.290863 | 12.66475 | 5.75985  | low  |
| GSM1672: | 4.416667 | 0 | 11.28464 | 13.64515 | 9.008959 | 6.81823  | 7.701868 | 5.255504 | low  |
| GSM1672: | 5.25     | 0 | 11.1285  | 13.74741 | 9.618723 | 7.333306 | 8.770178 | 6.439504 | high |
| GSM1672: | 1.916667 | 0 | 11.1745  | 13.38322 | 9.281783 | 6.934856 | 8.51728  | 4.772222 | low  |
| GSM1672: | 5.166667 | 0 | 9.212248 | 13.85528 | 9.674806 | 6.51443  | 7.8009   | 8.309494 | high |
| GSM1672: | 0.583333 | 1 | 12.23345 | 13.55012 | 9.700622 | 7.417169 | 7.603708 | 5.734242 | low  |
| GSM1672: | 2.166667 | 0 | 10.67195 | 13.98859 | 8.493974 | 7.073521 | 7.558153 | 6.455411 | high |
| GSM1672: | 3.333333 | 0 | 11.23857 | 13.83902 | 8.744398 | 7.34902  | 8.929847 | 5.489069 | low  |
| GSM1672: | 2.5      | 0 | 10.7519  | 14.11018 | 8.997412 | 7.250487 | 8.305756 | 7.255603 | high |
| GSM1672: | 3.333333 | 0 | 11.82605 | 14.03872 | 8.847638 | 7.288561 | 8.316549 | 5.880308 | high |
| GSM1672: | 7        | 0 | 11.27508 | 13.26429 | 9.064158 | 7.083538 | 9.133194 | 4.165989 | low  |
| GSM1672: | 1.5      | 1 | 10.52761 | 13.86191 | 9.261015 | 7.160161 | 7.433711 | 7.457894 | high |
| GSM1672: | 2.083333 | 1 | 11.31591 | 13.71729 | 9.380775 | 7.406243 | 8.700381 | 6.016559 | high |
| GSM1672: | 6.666667 | 0 | 10.70501 | 13.34593 | 9.098989 | 7.317325 | 6.561438 | 6.172275 | high |
| GSM1672: | 1        | 1 | 8.899303 | 13.67598 | 9.548895 | 7.171915 | 7.421518 | 9.191173 | high |
| GSM1672: | 2.666667 | 0 | 11.23138 | 13.26271 | 9.03292  | 6.617132 | 8.800761 | 3.902291 | low  |
| GSM1672: | 8.75     | 0 | 11.35912 | 13.4039  | 9.650622 | 7.42471  | 8.805689 | 5.435883 | low  |
| GSM1672: | 6.75     | 0 | 10.80746 | 13.85589 | 9.391647 | 6.785586 | 8.753417 | 6.079031 | high |
| GSM1672: | 6.25     | 0 | 10.72183 | 13.36669 | 8.518584 | 6.807396 | 9.755967 | 3.801293 | low  |
| GSM1672: | 8.083333 | 0 | 11.27999 | 13.01776 | 8.87681  | 7.14141  | 10.0561  | 3.34603  | low  |
| GSM1672: | 1.5      | 1 | 12.8806  | 13.60628 | 8.764973 | 6.931472 | 7.849536 | 3.949964 | low  |
| GSM1672: | 2.666667 | 1 | 11.54049 | 13.85291 | 9.840856 | 7.468954 | 9.246926 | 6.571885 | high |
| GSM1672: | 0.833333 | 1 | 9.896591 | 14.25396 | 9.718263 | 7.063437 | 7.620366 | 10.34511 | high |
| GSM1672: | 3.745    | 1 | 10.6597  | 13.50798 | 8.89949  | 6.354485 | 8.398774 | 4.53347  | low  |
| GSM1672: | 2.896667 | 1 | 10.20256 | 13.87869 | 9.902162 | 7.035795 | 7.965548 | 8.347058 | high |
| GSM1672: | 1.653333 | 1 | 9.518384 | 13.50217 | 10.04774 | 6.932755 | 6.970658 | 8.504535 | high |
| GSM1672: | 0.7175   | 1 | 10.77661 | 13.40582 | 9.25992  | 6.923349 | 8.835779 | 4.934533 | low  |
| GSM1672: | 0.044167 | 1 | 10.01456 | 12.61092 | 9.66817  | 6.924272 | 8.750988 | 4.175478 | low  |
| GSM1672: | 3.129167 | 1 | 8.446703 | 13.20473 | 10.03495 | 6.515771 | 8.83106  | 6.768104 | high |
| GSM1672: | 8.881667 | 0 | 10.29708 | 14.2055  | 10.02034 | 6.795222 | 7.824456 | 9.454239 | high |

|          |          |   |          |          |          |          |          |          |      |
|----------|----------|---|----------|----------|----------|----------|----------|----------|------|
| GSM16720 | 10.275   | 0 | 9.759068 | 13.59756 | 8.873596 | 6.757341 | 8.931479 | 5.536455 | low  |
| GSM16720 | 4.733333 | 1 | 10.09015 | 13.5216  | 9.202221 | 7.04242  | 7.656225 | 6.430558 | high |
| GSM16720 | 2.51     | 1 | 9.445298 | 13.81217 | 8.763285 | 6.588833 | 7.734764 | 6.697301 | high |
| GSM16720 | 1.110833 | 1 | 11.13401 | 13.17149 | 9.230368 | 6.951666 | 8.064468 | 4.495316 | low  |
| GSM16720 | 8.8325   | 1 | 11.29109 | 13.25591 | 9.049384 | 7.017784 | 10.11253 | 3.746625 | low  |
| GSM16720 | 3.701667 | 1 | 9.403947 | 13.26645 | 9.088152 | 7.017222 | 7.605702 | 6.162122 | high |
| GSM16720 | 1.738333 | 1 | 9.860207 | 13.47468 | 10.17482 | 7.2771   | 7.305852 | 8.538082 | high |
| GSM16720 | 2.3025   | 1 | 10.33985 | 13.37104 | 8.457063 | 6.403485 | 6.596792 | 4.804694 | low  |
| GSM16720 | 6.181667 | 1 | 10.55199 | 13.18903 | 9.533138 | 6.529731 | 7.345254 | 5.117279 | low  |
| GSM16720 | 8        | 1 | 10.68788 | 12.97496 | 9.126519 | 6.331565 | 10.64276 | 3.037809 | low  |
| GSM16720 | 3.444167 | 1 | 10.59521 | 13.37907 | 10.21954 | 6.546479 | 7.548814 | 6.281133 | high |
| GSM16720 | 0.470833 | 1 | 11.05547 | 13.68637 | 11.0759  | 7.478686 | 7.97994  | 9.33775  | high |
| GSM16720 | 0.035833 | 1 | 10.00913 | 13.80597 | 8.927131 | 6.413807 | 7.246285 | 6.409884 | high |
| GSM16720 | 1.38     | 1 | 9.963422 | 13.43832 | 9.590349 | 6.750478 | 7.950935 | 6.267094 | high |
| GSM16720 | 5.100833 | 1 | 10.85514 | 13.70383 | 10.30676 | 6.517364 | 7.476698 | 7.15317  | high |
| GSM16720 | 8.705833 | 0 | 9.593348 | 13.71091 | 9.661812 | 7.35193  | 7.849687 | 8.643552 | high |
| GSM16720 | 5.883333 | 1 | 10.29692 | 13.18303 | 9.509512 | 7.001468 | 7.973026 | 5.485414 | low  |
| GSM16720 | 0.293333 | 1 | 9.853238 | 13.74978 | 9.699364 | 6.983706 | 7.726661 | 8.020558 | high |
| GSM16720 | 1.461667 | 1 | 10.29531 | 14.11635 | 8.857969 | 6.612215 | 7.247225 | 7.280856 | high |
| GSM16720 | 2.296667 | 1 | 9.197536 | 14.04926 | 10.6183  | 7.441791 | 7.551724 | 13.52615 | high |
| GSM16720 | 1.365833 | 1 | 9.219628 | 13.69921 | 8.530566 | 6.78808  | 7.224513 | 6.813031 | high |
| GSM16720 | 6.475    | 0 | 11.33854 | 13.6518  | 10.24132 | 6.770231 | 7.698774 | 6.637236 | high |
| GSM16720 | 7.846667 | 0 | 10.96521 | 12.86279 | 8.676997 | 6.752429 | 8.84404  | 3.214294 | low  |
| GSM16720 | 6.116667 | 0 | 9.933865 | 13.54774 | 9.745544 | 6.77768  | 6.914254 | 7.502446 | high |
| GSM16720 | 3.77     | 1 | 12.12028 | 13.75037 | 9.127662 | 6.927215 | 7.252315 | 5.322927 | low  |
| GSM16720 | 0.0025   | 1 | 9.664616 | 13.34206 | 8.493485 | 5.933766 | 7.755816 | 4.33751  | low  |
| GSM16720 | 6.310833 | 1 | 11.5517  | 13.37356 | 9.083604 | 7.033268 | 8.891276 | 4.272333 | low  |
| GSM16720 | 3.255    | 1 | 11.57317 | 13.61708 | 9.170879 | 6.237831 | 7.841929 | 4.525182 | low  |
| GSM16720 | 6.466667 | 1 | 9.26407  | 13.57395 | 8.73421  | 6.420638 | 7.389231 | 6.099906 | high |
| GSM16720 | 0.189167 | 1 | 9.682099 | 13.88205 | 10.33581 | 6.616208 | 7.967601 | 9.035276 | high |
| GSM16720 | 7.036667 | 0 | 10.85802 | 13.27758 | 8.459659 | 5.771461 | 7.864799 | 3.380834 | low  |
| GSM16720 | 3.515    | 1 | 10.03461 | 13.29805 | 9.088542 | 6.699911 | 7.712032 | 5.313302 | low  |
| GSM16720 | 7.1375   | 1 | 10.80796 | 13.88126 | 9.700764 | 6.114904 | 7.465101 | 6.391134 | high |
| GSM16720 | 7.71     | 0 | 10.11022 | 13.88993 | 9.450813 | 6.393629 | 9.938393 | 5.769363 | low  |
| GSM16720 | 3.28     | 1 | 9.39508  | 13.82756 | 8.679776 | 6.206974 | 8.753066 | 5.673367 | low  |
| GSM16720 | 6.875    | 0 | 10.57574 | 13.20346 | 9.236864 | 6.451521 | 7.308312 | 4.777543 | low  |
| GSM16720 | 2.641667 | 0 | 10.48075 | 13.64946 | 8.663713 | 6.914731 | 7.839292 | 5.554614 | low  |
| GSM16720 | 3.501667 | 1 | 11.37577 | 13.47151 | 9.11585  | 6.695326 | 7.638414 | 4.800425 | low  |
| GSM16720 | 0.481667 | 1 | 11.49399 | 13.5887  | 9.031019 | 6.158681 | 6.752655 | 4.746201 | low  |
| GSM16720 | 0.640833 | 1 | 9.738314 | 13.18889 | 10.54915 | 7.219407 | 9.642729 | 6.646432 | high |
| GSM16720 | 3.991667 | 1 | 11.00504 | 13.35184 | 9.009133 | 6.63649  | 7.714884 | 4.60462  | low  |
| GSM16720 | 4.903333 | 0 | 10.03466 | 13.27031 | 9.434036 | 6.735122 | 7.721222 | 5.657887 | low  |
| GSM16720 | 6.795    | 0 | 11.8253  | 13.32639 | 8.870235 | 6.33767  | 6.871745 | 3.984768 | low  |
| GSM16720 | 2.0425   | 1 | 10.73451 | 13.39669 | 9.410471 | 6.55412  | 7.65839  | 5.235247 | low  |
| GSM16720 | 0.585833 | 1 | 10.09936 | 13.42738 | 8.703698 | 6.900993 | 7.803995 | 5.341113 | low  |
| GSM16720 | 0.8025   | 1 | 11.02692 | 13.6714  | 9.351163 | 6.774354 | 6.630028 | 6.423687 | high |
| GSM16720 | 3.350833 | 1 | 10.14186 | 13.4879  | 9.356892 | 6.576657 | 8.527731 | 5.482652 | low  |
| GSM16720 | 5.5575   | 0 | 10.85497 | 13.26225 | 8.80176  | 6.581928 | 9.018729 | 3.831245 | low  |
| GSM16720 | 3.414167 | 1 | 9.191804 | 14.25636 | 9.833119 | 6.600759 | 7.825544 | 10.50357 | high |
| GSM16720 | 6.343333 | 0 | 8.897192 | 13.38372 | 9.814095 | 6.454896 | 8.106825 | 6.927674 | high |
| GSM16720 | 6.053333 | 1 | 10.9847  | 13.41379 | 10.5878  | 7.063419 | 7.729403 | 7.09496  | high |
| GSM16720 | 0.999167 | 1 | 9.389081 | 13.84266 | 9.084042 | 6.703674 | 7.763292 | 7.453362 | high |
| GSM16720 | 0.52     | 1 | 9.271643 | 14.44802 | 9.664447 | 6.966936 | 7.541135 | 12.08581 | high |
| GSM16720 | 1.823333 | 1 | 11.07748 | 13.5074  | 9.037595 | 6.647194 | 7.874164 | 4.86684  | low  |
| GSM16720 | 6.570833 | 0 | 10.3777  | 13.35541 | 8.578739 | 6.788817 | 8.139014 | 4.601031 | low  |
| GSM16720 | 6.004167 | 0 | 10.43283 | 14.03936 | 9.18633  | 6.3527   | 7.295741 | 6.959351 | high |

|          |          |   |          |          |          |          |          |          |      |
|----------|----------|---|----------|----------|----------|----------|----------|----------|------|
| GSM1672( | 2.354167 | 1 | 9.578546 | 14.01793 | 8.524826 | 7.137704 | 8.388779 | 7.26424  | high |
| GSM1672( | 4.449167 | 0 | 10.29178 | 13.2918  | 9.416806 | 5.991994 | 9.754153 | 3.975681 | low  |
| GSM1672( | 3.2525   | 0 | 9.860805 | 13.68163 | 9.528015 | 6.745291 | 7.568154 | 7.251118 | high |
| GSM1672( | 4.35     | 1 | 11.13868 | 13.41133 | 7.909263 | 6.2241   | 7.248165 | 3.568344 | low  |
| GSM1672( | 1.314167 | 1 | 10.05708 | 13.77252 | 8.94928  | 6.552031 | 7.232661 | 6.480491 | high |
| GSM1672( | 2.305    | 1 | 9.088955 | 13.85531 | 8.137396 | 6.175033 | 9.298072 | 5.106311 | low  |
| GSM1672( | 2.4725   | 1 | 9.538086 | 13.34452 | 9.720131 | 6.625447 | 8.693271 | 5.993264 | high |
| GSM1672( | 1.001667 | 1 | 8.717114 | 13.32203 | 10.75298 | 7.450068 | 6.811702 | 11.37046 | high |
| GSM1672( | 12.515   | 0 | 8.864452 | 13.84807 | 9.654853 | 6.385511 | 7.779726 | 8.465368 | high |
| GSM1672( | 1.289167 | 1 | 10.94766 | 13.52066 | 8.589108 | 7.181636 | 7.279778 | 5.337223 | low  |
| GSM1672( | 2.061667 | 1 | 10.1941  | 13.48438 | 9.659636 | 6.449348 | 8.544478 | 5.620443 | low  |
| GSM1672( | 1.374167 | 1 | 9.642248 | 13.76207 | 9.686569 | 6.519499 | 7.908945 | 7.441245 | high |
| GSM1672( | 0.745    | 1 | 8.891161 | 13.82577 | 10.39996 | 7.066849 | 6.485544 | 12.40789 | high |
| GSM1672( | 2.198333 | 1 | 9.271052 | 13.32445 | 9.825975 | 6.795661 | 7.312157 | 7.33868  | high |
| GSM1672( | 1.516667 | 1 | 9.18912  | 13.27605 | 8.607499 | 7.116434 | 7.007812 | 6.222216 | high |
| GSM1672( | 6.628333 | 1 | 11.74459 | 13.28285 | 8.548951 | 7.266447 | 9.250623 | 3.637327 | low  |
| GSM1672( | 2.558333 | 1 | 9.807571 | 13.54761 | 8.662127 | 7.151238 | 7.903954 | 6.083613 | high |
| GSM1672( | 6.741667 | 1 | 8.958698 | 12.89867 | 8.779396 | 6.888509 | 6.778051 | 5.453402 | low  |
| GSM1672( | 0.975    | 1 | 11.79693 | 13.64532 | 9.647061 | 6.381261 | 6.913895 | 5.442751 | low  |
| GSM1672( | 2.766667 | 1 | 10.10287 | 13.02798 | 9.301353 | 6.20955  | 12.24089 | 2.98392  | low  |
| GSM1672( | 3.541667 | 1 | 11.40467 | 13.33223 | 8.950578 | 6.982011 | 7.229992 | 4.756594 | low  |
| GSM1672( | 10.2     | 1 | 10.29609 | 13.75634 | 10.46526 | 6.672373 | 8.00449  | 8.079933 | high |
| GSM1672( | 2.516667 | 1 | 9.76147  | 13.5272  | 8.561513 | 7.015145 | 5.870777 | 6.886362 | high |
| GSM1672( | 6.541667 | 1 | 10.67859 | 13.82443 | 8.717053 | 7.121185 | 7.334819 | 6.435862 | high |
| GSM1672( | 6.1      | 1 | 10.39067 | 13.53898 | 8.311866 | 7.013257 | 8.404631 | 4.842088 | low  |
| GSM1672( | 5.433333 | 1 | 10.5339  | 13.77525 | 8.890673 | 6.407761 | 7.957056 | 5.469215 | low  |
| GSM1672( | 12.15    | 0 | 9.949282 | 13.32293 | 8.728002 | 6.926077 | 6.921972 | 5.665003 | low  |
| GSM1672( | 6.141667 | 1 | 11.89042 | 13.48559 | 9.661296 | 6.528298 | 7.408848 | 4.939441 | low  |
| GSM1672( | 0.275    | 1 | 10.46043 | 14.03403 | 8.760954 | 6.529216 | 6.569107 | 6.998827 | high |
| GSM1672' | 1.625    | 1 | 12.08345 | 13.58088 | 9.299111 | 7.151721 | 8.507485 | 4.81197  | low  |
| GSM1672' | 0.7      | 1 | 10.54453 | 14.33546 | 9.40095  | 6.027434 | 7.349091 | 7.643474 | high |
| GSM1672' | 2.241667 | 1 | 10.35991 | 13.8578  | 9.986419 | 6.839278 | 8.171202 | 7.766528 | high |
| GSM1672' | 10.81667 | 0 | 9.571753 | 13.44065 | 10.20467 | 7.514217 | 10.09059 | 7.279739 | high |
| GSM1672' | 1.633333 | 1 | 11.61083 | 13.90659 | 9.221077 | 6.851635 | 7.328747 | 6.13489  | high |
| GSM1672' | 8.783333 | 1 | 11.25051 | 13.67184 | 8.982245 | 6.444634 | 7.291364 | 5.112252 | low  |
| GSM1672' | 13.125   | 1 | 11.82468 | 14.06699 | 9.310539 | 6.573801 | 7.133851 | 6.27332  | high |
| GSM1672' | 10.04167 | 1 | 10.08265 | 13.72403 | 9.395726 | 6.633888 | 6.78326  | 7.295665 | high |
| GSM1672' | 3.983333 | 1 | 9.425103 | 13.61159 | 10.24872 | 6.590959 | 6.714039 | 9.010343 | high |
| GSM1672' | 10.83333 | 1 | 9.533273 | 13.79561 | 9.867554 | 6.768855 | 7.243555 | 8.856696 | high |
| GSM1672' | 4.358333 | 0 | 10.31858 | 14.0195  | 9.038871 | 6.509675 | 8.65854  | 6.248654 | high |
| GSM1672' | 5.783333 | 0 | 11.38607 | 13.965   | 8.434845 | 6.269313 | 7.874182 | 4.722121 | low  |
| GSM1672' | 2.1625   | 1 | 10.30359 | 13.47355 | 8.569164 | 6.997279 | 8.051301 | 5.147186 | low  |
| GSM1672' | 10.15    | 0 | 8.875884 | 13.57784 | 9.434168 | 7.797763 | 7.527141 | 9.672961 | high |
| GSM1672' | 2.716667 | 1 | 10.23867 | 14.20297 | 10.17545 | 6.983793 | 6.596026 | 11.33212 | high |
| GSM1672' | 3.35     | 1 | 11.5447  | 13.88874 | 9.015206 | 6.403298 | 6.897253 | 5.592159 | low  |
| GSM1672' | 1.208333 | 1 | 11.08977 | 14.12294 | 10.2424  | 7.880195 | 8.000648 | 10.39178 | high |
| GSM1672' | 0.766667 | 1 | 8.332475 | 13.96682 | 8.677193 | 6.86839  | 7.017833 | 9.320397 | high |
| GSM1672' | 1.583333 | 1 | 9.380777 | 13.45495 | 9.479924 | 6.266213 | 6.662419 | 6.806822 | high |
| GSM1672' | 10.1     | 0 | 10.52668 | 13.70252 | 8.831578 | 6.524764 | 8.482421 | 5.120375 | low  |
| GSM1672' | 0.75     | 1 | 9.862549 | 13.58151 | 8.991739 | 6.13729  | 8.792045 | 4.958017 | low  |
| GSM1672' | 8.133333 | 0 | 10.17404 | 14.01596 | 9.387608 | 6.792386 | 8.699736 | 7.202106 | high |
| GSM1672' | 14.65833 | 0 | 9.932507 | 13.55284 | 10.32233 | 6.626217 | 8.347644 | 7.246972 | high |
| GSM1672' | 3.775    | 1 | 10.27785 | 14.18509 | 9.284231 | 6.277908 | 6.698982 | 8.04574  | high |

Supplementary Table 4. List of DEGs between normal than tumor in TCGA database

| gene     | logFC        | AveExpr     | t            | P.Value   | adj.P.Val | B           |
|----------|--------------|-------------|--------------|-----------|-----------|-------------|
| GPM6A    | 2.778249624  | 0.647571565 | 37.90264944  | 5.14E-158 | 1.01E-153 | 350.523958  |
| SERTM1   | 2.358019267  | 0.406679703 | 37.15232536  | 1.74E-154 | 1.71E-150 | 342.4378591 |
| SH3GL3   | 1.26346089   | 0.250475837 | 36.17924803  | 7.29E-150 | 4.78E-146 | 331.8479095 |
| SLC6A4   | 3.868215395  | 0.714455861 | 36.02657162  | 3.92E-149 | 1.92E-145 | 330.1758682 |
| SGCG     | 1.731139528  | 0.464160961 | 34.82466249  | 2.39E-143 | 9.41E-140 | 316.9155697 |
| C10orf67 | 1.185393219  | 0.258976412 | 34.55784188  | 4.72E-142 | 1.54E-138 | 313.9486644 |
| RS1      | 1.122518642  | 0.249868526 | 34.46973963  | 1.26E-141 | 3.55E-138 | 312.9671936 |
| ANGPT4   | 1.142097943  | 0.237410404 | 34.38276341  | 3.35E-141 | 8.22E-138 | 311.9973848 |
| ITLN2    | 3.821337902  | 0.904781456 | 33.05470008  | 1.08E-134 | 2.35E-131 | 297.0821825 |
| WNT3A    | 2.170047747  | 0.550873829 | 32.82250538  | 1.51E-133 | 2.96E-130 | 294.4542855 |
| GYPE     | 1.269367035  | 0.396059965 | 32.48104905  | 7.38E-132 | 1.32E-128 | 290.5792089 |
| CD300LG  | 1.895147017  | 0.351103705 | 32.11254826  | 4.99E-130 | 8.17E-127 | 286.3832902 |
| RTKN2    | 3.467985356  | 1.61367099  | 31.53501581  | 3.79E-127 | 5.72E-124 | 279.7788606 |
| SPAAR    | 1.389070749  | 0.741946757 | 30.38366528  | 2.31E-121 | 3.02E-118 | 266.5137089 |
| SCUBE1   | 1.751724264  | 0.528060763 | 30.02325826  | 1.53E-119 | 1.88E-116 | 262.3356916 |
| MYZAP    | 2.187791222  | 0.987360241 | 29.72577948  | 4.92E-118 | 5.69E-115 | 258.8784471 |
| LGI3     | 3.631298255  | 1.018603097 | 29.66000255  | 1.06E-117 | 1.16E-114 | 258.1129599 |
| CA4      | 3.313336157  | 1.041610122 | 29.56382437  | 3.27E-117 | 3.38E-114 | 256.9930079 |
| FABP4    | 4.938887641  | 2.010070834 | 29.40349609  | 2.13E-116 | 2.09E-113 | 255.1243168 |
| FAM107A  | 3.850324817  | 1.745860279 | 29.36076655  | 3.52E-116 | 3.29E-113 | 254.6259237 |
| GRIA1    | 1.606153719  | 0.416324595 | 29.08606498  | 8.80E-115 | 7.52E-112 | 251.4182523 |
| RXFP1    | 1.138069298  | 0.384584015 | 28.99211692  | 2.65E-114 | 2.17E-111 | 250.319829  |
| NECAB1   | 1.740646454  | 0.650561461 | 28.59660196  | 2.77E-112 | 2.09E-109 | 245.6879786 |
| CNTN6    | 1.679879974  | 0.47524594  | 28.45598184  | 1.45E-111 | 1.06E-108 | 244.0383242 |
| FXYD1    | 1.333944386  | 0.541476891 | 28.19937246  | 2.99E-110 | 2.10E-107 | 241.0242467 |
| TEK      | 2.731336454  | 1.840121231 | 27.87160322  | 1.44E-108 | 9.73E-106 | 237.1676155 |
| NCKAP5   | 2.266772615  | 0.785614956 | 27.68093007  | 1.37E-107 | 8.68E-105 | 234.9207785 |
| CHRM1    | 1.122962741  | 0.21436312  | 27.50267975  | 1.13E-106 | 6.94E-104 | 232.8182144 |
| TAL1     | 1.387480677  | 0.659809693 | 27.30517184  | 1.17E-105 | 6.99E-103 | 230.4861986 |
| CCDC85A  | 1.183151619  | 0.480055462 | 27.20926217  | 3.66E-105 | 2.12E-102 | 229.3529315 |
| STX11    | 2.711212989  | 2.330854137 | 27.17861495  | 5.27E-105 | 2.96E-102 | 228.9906912 |
| GPD1     | 3.076602923  | 1.227096937 | 27.10384075  | 1.28E-104 | 6.98E-102 | 228.1066573 |
| STXBP6   | 2.147766194  | 0.81880504  | 27.03024107  | 3.06E-104 | 1.63E-101 | 227.2361997 |
| ST8SIA6  | 1.653732584  | 0.56884088  | 26.80180325  | 4.62E-103 | 2.39E-100 | 224.5325867 |
| KANK3    | 2.040225706  | 1.322255434 | 26.62318492  | 3.87E-102 | 1.95E-99  | 222.4166815 |
| EDNRB    | 3.160259667  | 2.140779244 | 26.56436464  | 7.78E-102 | 3.82E-99  | 221.7195462 |
| LIMS2    | 2.218423936  | 1.698588259 | 26.26795695  | 2.65E-100 | 1.27E-97  | 218.2040142 |
| HSPA12B  | 2.115101298  | 1.660449672 | 25.74619985  | 1.33E-97  | 6.09E-95  | 212.0064637 |
| ADRB2    | 2.455109244  | 1.48696329  | 25.74273119  | 1.39E-97  | 6.20E-95  | 211.9652264 |
| ADAMTS8  | 2.703389294  | 1.139870429 | 25.69400855  | 2.48E-97  | 1.08E-94  | 211.3859414 |
| PYCR1    | -3.283780832 | 4.889937575 | -25.61873502 | 6.10E-97  | 2.61E-94  | 210.4908161 |
| GPIHBP1  | 3.157099298  | 1.452853366 | 25.51557248  | 2.09E-96  | 8.74E-94  | 209.2637315 |
| ANKRD1   | 3.761272051  | 1.30544266  | 25.4930456   | 2.74E-96  | 1.12E-93  | 208.995735  |
| UPK3B    | 4.371805848  | 1.857261596 | 25.47934053  | 3.22E-96  | 1.29E-93  | 208.8326813 |
| PRX      | 2.694422553  | 1.76999014  | 25.29547479  | 2.90E-95  | 1.14E-92  | 206.64461   |
| RSPO1    | 1.358194895  | 0.40359631  | 25.25773554  | 4.55E-95  | 1.75E-92  | 206.1953753 |
| OTUD1    | 1.816942355  | 2.973790402 | 25.23349505  | 6.07E-95  | 2.29E-92  | 205.9068039 |
| JAM2     | 1.966513551  | 1.639567177 | 25.22820665  | 6.47E-95  | 2.40E-92  | 205.843846  |
| MYOC     | 1.401821514  | 0.271048018 | 25.22162358  | 7.00E-95  | 2.55E-92  | 205.765474  |
| SEMA3G   | 2.292854247  | 1.578701378 | 25.1253386   | 2.21E-94  | 7.90E-92  | 204.6190596 |
| HBA1     | 1.553886186  | 0.375441542 | 25.01544747  | 8.22E-94  | 2.88E-91  | 203.3103542 |
| ARHGAP6  | 1.23854606   | 0.724634528 | 24.8175561   | 8.76E-93  | 3.02E-90  | 200.9529391 |
| PTPN21   | 2.000397366  | 1.953631753 | 24.79152503  | 1.20E-92  | 4.05E-90  | 200.642778  |
| LDB2     | 2.181375454  | 2.068855224 | 24.73565326  | 2.33E-92  | 7.64E-90  | 199.9770194 |

|          |             |             |             |          |          |             |
|----------|-------------|-------------|-------------|----------|----------|-------------|
| ACADL    | 2.178089599 | 0.909454599 | 24.64805428 | 6.65E-92 | 2.14E-89 | 198.9330898 |
| TMEM100  | 3.838353317 | 1.831766901 | 24.54846667 | 2.19E-91 | 6.94E-89 | 197.7461335 |
| CLEC1A   | 1.413729513 | 1.037760385 | 24.52892415 | 2.77E-91 | 8.62E-89 | 197.5131938 |
| ACVRL1   | 2.304306377 | 3.010416936 | 24.5135742  | 3.32E-91 | 1.02E-88 | 197.330224  |
| NOVA2    | 1.129172166 | 0.649206948 | 24.48762677 | 4.53E-91 | 1.37E-88 | 197.0209258 |
| ROBO4    | 2.369279485 | 2.107097328 | 24.4841316  | 4.73E-91 | 1.41E-88 | 196.979262  |
| WWC2     | 2.002202132 | 2.198864706 | 24.38433776 | 1.56E-90 | 4.57E-88 | 195.7896132 |
| CCM2L    | 1.686337621 | 1.166753626 | 24.26209705 | 6.73E-90 | 1.92E-87 | 194.3322162 |
| BTNL9    | 2.515343221 | 1.147319896 | 24.17886032 | 1.82E-89 | 5.12E-87 | 193.3397566 |
| ANGPTL7  | 1.058446518 | 0.230219638 | 24.1627194  | 2.21E-89 | 6.12E-87 | 193.1472964 |
| S1PR1    | 2.634631932 | 3.194938906 | 24.15392478 | 2.46E-89 | 6.70E-87 | 193.0424308 |
| CLEC3B   | 3.850323912 | 3.067279813 | 24.09047277 | 5.25E-89 | 1.39E-86 | 192.2858242 |
| FHL1     | 3.451676005 | 2.690965106 | 24.07533709 | 6.29E-89 | 1.65E-86 | 192.1053414 |
| ECSCR    | 1.92850358  | 2.014902517 | 24.05541164 | 7.99E-89 | 2.06E-86 | 191.867742  |
| AGER     | 6.216060798 | 4.397378457 | 24.032187   | 1.05E-88 | 2.69E-86 | 191.5907992 |
| CLIC5    | 3.670915492 | 2.177540909 | 23.94390197 | 3.03E-88 | 7.64E-86 | 190.5380211 |
| RAMP2    | 2.719361691 | 3.716599827 | 23.85992405 | 8.29E-88 | 2.06E-85 | 189.5365837 |
| NMUR1    | 1.102508144 | 0.514465201 | 23.83897538 | 1.06E-87 | 2.61E-85 | 189.2867689 |
| TCF21    | 2.477477622 | 1.305948501 | 23.82269852 | 1.29E-87 | 3.14E-85 | 189.0926657 |
| PRKG2    | 1.302019449 | 0.613618536 | 23.76404198 | 2.61E-87 | 6.18E-85 | 188.3931806 |
| ODAM     | 1.290163936 | 0.363969545 | 23.63312987 | 1.25E-86 | 2.89E-84 | 186.8320589 |
| ALKAL2   | 1.470133887 | 0.541947438 | 23.56392778 | 2.86E-86 | 6.54E-84 | 186.0068497 |
| PECAM1   | 2.24606215  | 4.744001265 | 23.39604452 | 2.13E-85 | 4.82E-83 | 184.0050237 |
| LYVE1    | 2.614262495 | 1.665014604 | 23.36924903 | 2.94E-85 | 6.57E-83 | 183.6855372 |
| EPAS1    | 2.584988366 | 5.835388532 | 23.32677767 | 4.89E-85 | 1.08E-82 | 183.1791593 |
| CD101    | 1.708316015 | 1.149842184 | 23.2951516  | 7.14E-85 | 1.56E-82 | 182.8021    |
| FOXF1    | 2.182746652 | 1.84524006  | 23.25929362 | 1.10E-84 | 2.37E-82 | 182.3745996 |
| RGCC     | 2.834389397 | 5.543240482 | 23.21444318 | 1.87E-84 | 4.00E-82 | 181.8399128 |
| GPR146   | 1.010522176 | 0.622247747 | 23.15338632 | 3.89E-84 | 8.22E-82 | 181.1120629 |
| SIRPB1   | 1.78480254  | 0.975690206 | 23.14807101 | 4.15E-84 | 8.67E-82 | 181.0487024 |
| FRMD3    | 1.329757535 | 0.733034753 | 23.04661202 | 1.40E-83 | 2.89E-81 | 179.8393551 |
| RAMP3    | 2.893488664 | 3.425102015 | 23.0079791  | 2.22E-83 | 4.53E-81 | 179.3789119 |
| EMP2     | 2.762032308 | 4.944441504 | 22.9795933  | 3.11E-83 | 6.30E-81 | 179.040615  |
| FCN3     | 4.041817547 | 2.360519379 | 22.97298019 | 3.37E-83 | 6.68E-81 | 178.9618033 |
| FHL5     | 1.936739353 | 1.121997427 | 22.96782468 | 3.58E-83 | 7.04E-81 | 178.9003631 |
| ABCA8    | 1.927415826 | 0.910063954 | 22.94420893 | 4.75E-83 | 9.15E-81 | 178.6189314 |
| MCEMP1   | 4.12744108  | 2.338709552 | 22.86186992 | 1.27E-82 | 2.43E-80 | 177.6377741 |
| ARHGEF26 | 2.326275391 | 2.038262505 | 22.82035665 | 2.09E-82 | 3.95E-80 | 177.1431531 |
| GSTM5    | 1.21036648  | 0.682347837 | 22.78921072 | 3.03E-82 | 5.67E-80 | 176.7720816 |
| USHBP1   | 1.109373638 | 0.691665142 | 22.77208762 | 3.72E-82 | 6.90E-80 | 176.5680871 |
| SPOCK2   | 3.24116707  | 3.622837393 | 22.76245621 | 4.18E-82 | 7.67E-80 | 176.4533472 |
| SCN4B    | 1.959427509 | 1.138970132 | 22.75495349 | 4.57E-82 | 8.31E-80 | 176.363968  |
| GRK5     | 2.148635477 | 2.115757696 | 22.70483442 | 8.31E-82 | 1.50E-79 | 175.7669397 |
| MGAT3    | 2.589605246 | 1.35153487  | 22.68736826 | 1.02E-81 | 1.83E-79 | 175.558894  |
| SLC19A3  | 1.84798736  | 0.847170935 | 22.66965626 | 1.27E-81 | 2.24E-79 | 175.3479279 |
| VEGFD    | 3.330330068 | 1.568848271 | 22.66290268 | 1.37E-81 | 2.41E-79 | 175.2674888 |
| FGFBP2   | 1.848374198 | 0.645934394 | 22.59107148 | 3.24E-81 | 5.58E-79 | 174.4120115 |
| RGS9     | 1.045885491 | 0.574070524 | 22.59038538 | 3.27E-81 | 5.58E-79 | 174.403841  |
| FGD5     | 1.839823456 | 1.953271941 | 22.48174366 | 1.20E-80 | 2.03E-78 | 173.1102449 |
| CAV1     | 3.884710949 | 4.883969083 | 22.47594831 | 1.28E-80 | 2.15E-78 | 173.0412496 |
| TNNC1    | 3.642776143 | 2.644135741 | 22.47543336 | 1.29E-80 | 2.15E-78 | 173.035119  |
| STARD13  | 1.469334986 | 1.502211342 | 22.46245005 | 1.51E-80 | 2.49E-78 | 172.8805529 |
| FMO2     | 3.137443483 | 2.608085891 | 22.45645986 | 1.62E-80 | 2.65E-78 | 172.8092415 |
| GDF10    | 2.583716903 | 1.191186855 | 22.3535407  | 5.53E-80 | 8.91E-78 | 171.5841996 |
| ARHGEF15 | 1.861194991 | 1.655338997 | 22.32878106 | 7.44E-80 | 1.19E-77 | 171.2895391 |
| CALCRL   | 2.503008974 | 2.677390296 | 22.32022655 | 8.24E-80 | 1.30E-77 | 171.1877381 |

|           |              |             |              |          |          |             |
|-----------|--------------|-------------|--------------|----------|----------|-------------|
| PLAC9     | 2.25830011   | 2.155378944 | 22.31166035  | 9.12E-80 | 1.42E-77 | 171.0858006 |
| NXPB3     | 1.13558764   | 0.630537674 | 22.21034726  | 3.06E-79 | 4.73E-77 | 169.8803758 |
| C14orf132 | 2.180884126  | 1.634973485 | 22.20255551  | 3.36E-79 | 5.15E-77 | 169.787685  |
| EMCN      | 2.288697787  | 1.825078702 | 22.19760777  | 3.56E-79 | 5.42E-77 | 169.7288277 |
| CDH5      | 2.355735272  | 3.194904055 | 22.1463629   | 6.57E-79 | 9.92E-77 | 169.1192849 |
| PDLIM2    | 1.442511367  | 1.607063662 | 22.07104067  | 1.61E-78 | 2.42E-76 | 168.2235361 |
| LRRN3     | 1.634841753  | 0.6989486   | 22.05831616  | 1.88E-78 | 2.79E-76 | 168.0722361 |
| SH2D3C    | 1.922876977  | 2.372233712 | 22.02463785  | 2.81E-78 | 4.15E-76 | 167.6718186 |
| EFCC1     | 1.898454852  | 1.382034651 | 21.94481579  | 7.27E-78 | 1.07E-75 | 166.722969  |
| PTPRB     | 2.180041445  | 1.963064984 | 21.93583415  | 8.10E-78 | 1.18E-75 | 166.6162211 |
| CAVIN2    | 3.432926396  | 3.694935249 | 21.84265242  | 2.46E-77 | 3.55E-75 | 165.5089611 |
| ADGRE3    | 1.135885948  | 0.470984673 | 21.83979037  | 2.54E-77 | 3.65E-75 | 165.4749582 |
| MYCT1     | 1.82911315   | 1.9522529   | 21.8176501   | 3.31E-77 | 4.72E-75 | 165.211932  |
| LIN7A     | 1.548050783  | 0.741764272 | 21.79891132  | 4.14E-77 | 5.86E-75 | 164.9893338 |
| SOX7      | 2.045984835  | 1.365895669 | 21.74438038  | 7.94E-77 | 1.11E-74 | 164.341657  |
| TENT5B    | 2.410831848  | 1.816873691 | 21.66604074  | 2.02E-76 | 2.81E-74 | 163.4114584 |
| CDO1      | 1.739917374  | 0.95017665  | 21.65170591  | 2.39E-76 | 3.31E-74 | 163.2412818 |
| PRKCE     | 1.330948603  | 1.575514728 | 21.60695699  | 4.08E-76 | 5.61E-74 | 162.7101126 |
| CYYR1     | 1.906327499  | 2.338014548 | 21.53644072  | 9.45E-76 | 1.29E-73 | 161.8733033 |
| SEMA6A    | 1.566677281  | 0.9285801   | 21.52302776  | 1.11E-75 | 1.50E-73 | 161.714164  |
| CD36      | 2.76741359   | 1.789115957 | 21.47985485  | 1.85E-75 | 2.49E-73 | 161.2020034 |
| TGFBR3    | 2.096706333  | 1.545503836 | 21.38141815  | 5.98E-75 | 8.00E-73 | 160.0346491 |
| ALDH18A1  | -1.56475399  | 4.749827392 | -21.37157885 | 6.73E-75 | 8.93E-73 | 159.9179969 |
| GIMAP8    | 2.160551749  | 2.373685981 | 21.35712591  | 7.99E-75 | 1.05E-72 | 159.7466571 |
| CTXND1    | 1.137541271  | 0.32241917  | 21.30238146  | 1.53E-74 | 2.01E-72 | 159.0977761 |
| THSD1     | 1.497718018  | 1.288391063 | 21.25717133  | 2.62E-74 | 3.41E-72 | 158.5620444 |
| RASIP1    | 1.880497124  | 1.909883933 | 21.24035805  | 3.20E-74 | 4.14E-72 | 158.3628429 |
| VIPR1     | 2.486166947  | 1.725313325 | 21.21714042  | 4.22E-74 | 5.42E-72 | 158.0877934 |
| SOSTDC1   | 2.810817902  | 0.992108267 | 21.21662105  | 4.25E-74 | 5.42E-72 | 158.081641  |
| SOX17     | 1.663734883  | 1.074550622 | 21.18796559  | 5.97E-74 | 7.57E-72 | 157.7422206 |
| FAM189A2  | 2.658959604  | 1.991847586 | 21.17092734  | 7.31E-74 | 9.21E-72 | 157.5404301 |
| STARD8    | 1.623052893  | 1.688633232 | 21.15349309  | 9.00E-74 | 1.13E-71 | 157.3339693 |
| FEZ1      | 1.409150319  | 1.222359554 | 21.12171836  | 1.31E-73 | 1.63E-71 | 156.9577368 |
| HIGD1B    | 2.375949095  | 2.057973946 | 21.04040919  | 3.45E-73 | 4.23E-71 | 155.9952971 |
| ERG       | 1.642458515  | 1.738598308 | 20.97560362  | 7.45E-73 | 9.03E-71 | 155.2285358 |
| AGRP      | 1.694327992  | 0.771124829 | 20.97270977  | 7.71E-73 | 9.29E-71 | 155.1943036 |
| NPR1      | 2.34540126   | 1.878630564 | 20.88569714  | 2.16E-72 | 2.56E-70 | 154.1652864 |
| PHACTR1   | 1.698810016  | 1.306745267 | 20.84405013  | 3.55E-72 | 4.17E-70 | 153.6729637 |
| INMT      | 3.649635753  | 2.950345013 | 20.82931055  | 4.23E-72 | 4.91E-70 | 153.4987536 |
| FPR2      | 1.792765769  | 0.883904727 | 20.8172009   | 4.88E-72 | 5.64E-70 | 153.3556395 |
| ADRB1     | 2.395255994  | 1.197613025 | 20.79236985  | 6.55E-72 | 7.52E-70 | 153.0622165 |
| NLRC4     | 1.392332211  | 1.219951263 | 20.72880082  | 1.39E-71 | 1.58E-69 | 152.3112528 |
| IGSF10    | 1.651753882  | 0.732087297 | 20.72005776  | 1.54E-71 | 1.74E-69 | 152.2079927 |
| COL6A6    | 1.850668418  | 0.913772356 | 20.69786219  | 2.01E-71 | 2.25E-69 | 151.9458787 |
| SMAD6     | 1.662173805  | 1.417345543 | 20.65242168  | 3.44E-71 | 3.84E-69 | 151.409381  |
| FAM110D   | 1.353220304  | 0.98202959  | 20.61674391  | 5.25E-71 | 5.79E-69 | 150.9882656 |
| LRRC36    | 2.140826829  | 0.912944988 | 20.6093064   | 5.73E-71 | 6.29E-69 | 150.9004916 |
| HBA2      | 4.119652558  | 2.894734473 | 20.51862229  | 1.68E-70 | 1.80E-68 | 149.8306511 |
| PKNOX2    | 1.262912909  | 0.70073378  | 20.29654371  | 2.32E-69 | 2.45E-67 | 147.2137036 |
| HTR3C     | 1.001336     | 0.184958293 | 20.22228142  | 5.58E-69 | 5.86E-67 | 146.3396044 |
| DNASE1L3  | 2.026707083  | 0.88758609  | 20.21475011  | 6.10E-69 | 6.37E-67 | 146.2509865 |
| PPP1R14B  | -2.036646497 | 5.557289591 | -20.11583524 | 1.96E-68 | 2.04E-66 | 145.087601  |
| ARC       | 1.523525852  | 0.59186087  | 20.08520712  | 2.81E-68 | 2.91E-66 | 144.7275621 |
| SLC39A8   | 2.612334346  | 4.260009452 | 20.08029748  | 2.98E-68 | 3.07E-66 | 144.669857  |
| TMEM177   | -1.185835843 | 2.319181457 | -20.06811145 | 3.44E-68 | 3.52E-66 | 144.5266398 |
| ANOS1     | 2.685973324  | 2.465483659 | 20.00511285  | 7.24E-68 | 7.29E-66 | 143.7864818 |



|          |              |             |              |          |          |             |
|----------|--------------|-------------|--------------|----------|----------|-------------|
| GOLM1    | -2.428754504 | 5.727232768 | -19.98487339 | 9.19E-68 | 9.16E-66 | 143.5487777 |
| SLIT2    | 2.035324614  | 1.829328272 | 19.91924417  | 1.99E-67 | 1.97E-65 | 142.7782796 |
| RBP2     | 1.683205665  | 0.5629709   | 19.90175807  | 2.45E-67 | 2.40E-65 | 142.5730654 |
| DACH1    | 1.523468714  | 0.834785634 | 19.85261665  | 4.36E-67 | 4.24E-65 | 141.996522  |
| ADAMTSL3 | 1.343544828  | 0.817850351 | 19.74881988  | 1.48E-66 | 1.43E-64 | 140.7795963 |
| ANGPTL1  | 1.528154238  | 0.825204443 | 19.7411163   | 1.62E-66 | 1.55E-64 | 140.6893256 |
| CLEC14A  | 2.139864226  | 3.576678034 | 19.69197854  | 2.89E-66 | 2.74E-64 | 140.1136826 |
| DPEP2    | 1.638834356  | 1.418890293 | 19.63823328  | 5.43E-66 | 5.13E-64 | 139.4843737 |
| CLDN18   | 5.61496127   | 2.997589546 | 19.6342535   | 5.69E-66 | 5.33E-64 | 139.4377871 |
| SEMA5A   | 2.096199542  | 1.547479025 | 19.63421386  | 5.70E-66 | 5.33E-64 | 139.437323  |
| MMRN2    | 1.811023469  | 2.477861216 | 19.58552794  | 1.01E-65 | 9.40E-64 | 138.867561  |
| GRASP    | 1.905492022  | 2.111128942 | 19.56354045  | 1.31E-65 | 1.21E-63 | 138.6103354 |
| KCNT2    | 1.004184307  | 0.392431132 | 19.53060956  | 1.92E-65 | 1.77E-63 | 138.2251914 |
| CAT      | 1.893481379  | 4.939457027 | 19.45146073  | 4.87E-65 | 4.41E-63 | 137.3000289 |
| GLDN     | 1.551210278  | 0.953930566 | 19.44712324  | 5.12E-65 | 4.62E-63 | 137.24935   |
| LMO2     | 1.599536481  | 2.311896443 | 19.39279643  | 9.69E-65 | 8.69E-63 | 136.6147937 |
| ACKR4    | 1.292570984  | 0.640209008 | 19.3881863   | 1.02E-64 | 9.13E-63 | 136.5609623 |
| GPA33    | 1.948491176  | 0.755986856 | 19.26445918  | 4.36E-64 | 3.87E-62 | 135.1172148 |
| PTCRA    | 1.041497951  | 0.569062134 | 19.24921303  | 5.21E-64 | 4.61E-62 | 134.9394436 |
| HHIP     | 2.455850786  | 1.073383764 | 19.19110808  | 1.03E-63 | 9.05E-62 | 134.2622085 |
| RASGRP4  | 1.05656848   | 0.863747847 | 19.17855872  | 1.19E-63 | 1.04E-61 | 134.1159983 |
| MME      | 2.292179282  | 1.376489626 | 19.13015427  | 2.10E-63 | 1.83E-61 | 133.5522393 |
| ADGRE1   | 1.500978413  | 0.758202038 | 19.10120187  | 2.94E-63 | 2.53E-61 | 133.2151826 |
| ARHGAP31 | 1.94076621   | 2.404849115 | 19.07157299  | 4.16E-63 | 3.56E-61 | 132.8703657 |
| PLA2G4F  | 2.455578521  | 1.673641279 | 19.05099205  | 5.28E-63 | 4.51E-61 | 132.6309166 |
| EFNA4    | -1.894199656 | 3.786891761 | -19.04868576 | 5.43E-63 | 4.62E-61 | 132.6040876 |
| SRPK1    | -1.415479406 | 3.678654    | -19.00351977 | 9.20E-63 | 7.79E-61 | 132.0788181 |
| VEPH1    | 2.426837805  | 1.624122294 | 19.00158043  | 9.41E-63 | 7.93E-61 | 132.0562702 |
| TGM1     | 1.230254907  | 0.718309683 | 18.99265844  | 1.04E-62 | 8.77E-61 | 131.9525447 |
| PAICS    | -1.655271121 | 3.965222434 | -18.90149494 | 3.02E-62 | 2.51E-60 | 130.8933226 |
| SBSPON   | 1.61353991   | 0.896382182 | 18.77079394  | 1.39E-61 | 1.13E-59 | 129.3767545 |
| CLDN5    | 2.571441412  | 2.955065089 | 18.75659651  | 1.64E-61 | 1.33E-59 | 129.2121645 |
| GIMAP1   | 1.423081801  | 1.456641465 | 18.7338368   | 2.13E-61 | 1.73E-59 | 128.9483735 |
| SLC14A1  | 1.141331841  | 0.471329081 | 18.73000986  | 2.23E-61 | 1.80E-59 | 128.9040257 |
| ATIC     | -1.230856646 | 4.593150728 | -18.72380128 | 2.40E-61 | 1.93E-59 | 128.8320833 |
| AOC3     | 2.668243462  | 3.600893246 | 18.68142147  | 3.92E-61 | 3.14E-59 | 128.341155  |
| RAI2     | 1.905023466  | 2.288325148 | 18.66029222  | 5.01E-61 | 3.99E-59 | 128.0964928 |
| C1QTNF7  | 1.412230219  | 0.778563732 | 18.617997    | 8.19E-61 | 6.49E-59 | 127.6069433 |
| RHOJ     | 1.497864623  | 2.013265456 | 18.61062455  | 8.93E-61 | 7.04E-59 | 127.5216378 |
| RCC1     | -1.565705646 | 3.946704655 | -18.58204476 | 1.24E-60 | 9.78E-59 | 127.1910228 |
| UBE2T    | -2.551983139 | 3.692285321 | -18.54775983 | 1.85E-60 | 1.44E-58 | 126.7945739 |
| SULT1C4  | 1.345370162  | 0.862753072 | 18.53995742  | 2.03E-60 | 1.57E-58 | 126.704377  |
| PEAR1    | 1.34317875   | 1.249698761 | 18.52210828  | 2.49E-60 | 1.92E-58 | 126.4980736 |
| DKK2     | 1.396318428  | 1.021059164 | 18.50851176  | 2.92E-60 | 2.24E-58 | 126.3409556 |
| LRRC32   | 1.996264889  | 3.141279926 | 18.50270859  | 3.12E-60 | 2.39E-58 | 126.2739044 |
| ABI3BP   | 2.182547782  | 1.828511195 | 18.49111576  | 3.57E-60 | 2.72E-58 | 126.1399735 |
| NME1     | -1.949818827 | 3.922778987 | -18.49000925 | 3.62E-60 | 2.75E-58 | 126.1271912 |
| CGNL1    | 2.039546025  | 2.446520409 | 18.44480802  | 6.11E-60 | 4.62E-58 | 125.6051937 |
| CXCR2    | 1.253827198  | 0.676933913 | 18.44220991  | 6.30E-60 | 4.74E-58 | 125.5751998 |
| CORO2B   | 1.289521796  | 0.900075056 | 18.44151193  | 6.35E-60 | 4.76E-58 | 125.5671421 |
| OR7E47P  | 1.652176055  | 1.496483138 | 18.43176061  | 7.11E-60 | 5.31E-58 | 125.454578  |
| PIP5K1B  | 1.863824265  | 1.428879685 | 18.42110822  | 8.05E-60 | 5.99E-58 | 125.3316294 |
| CFP      | 1.202024442  | 0.904677367 | 18.41972474  | 8.18E-60 | 6.06E-58 | 125.3156628 |
| TNXB     | 2.111125026  | 1.310745786 | 18.37649122  | 1.35E-59 | 9.93E-58 | 124.8168613 |
| ADPRH    | 1.312044345  | 2.206057915 | 18.36700024  | 1.51E-59 | 1.10E-57 | 124.7074001 |
| TMEM88   | 1.668171466  | 1.794195643 | 18.32725985  | 2.39E-59 | 1.74E-57 | 124.2492241 |

|            |              |             |              |          |          |             |
|------------|--------------|-------------|--------------|----------|----------|-------------|
| F11        | 1.383127234  | 0.502024208 | 18.2842782   | 3.92E-59 | 2.83E-57 | 123.7539663 |
| SFXN1      | -1.208412119 | 2.735811263 | -18.25468921 | 5.52E-59 | 3.97E-57 | 123.4132013 |
| PI16       | 1.659836321  | 0.604176679 | 18.24137998  | 6.44E-59 | 4.62E-57 | 123.2599708 |
| CASQ2      | 1.130527618  | 0.498834738 | 18.21050992  | 9.20E-59 | 6.57E-57 | 122.9046737 |
| HBB        | 4.559863442  | 4.423530307 | 18.20812905  | 9.46E-59 | 6.73E-57 | 122.8772777 |
| MAMDC2     | 2.447973615  | 1.783639094 | 18.19010595  | 1.16E-58 | 8.23E-57 | 122.6699222 |
| SASH1      | 1.516435684  | 2.256703966 | 18.1783656   | 1.33E-58 | 9.39E-57 | 122.5348788 |
| THBD       | 2.354528617  | 3.452272707 | 18.16240986  | 1.60E-58 | 1.13E-56 | 122.3513848 |
| ADH1B      | 3.729448555  | 2.577024817 | 18.14532756  | 1.95E-58 | 1.37E-56 | 122.1549827 |
| PALMD      | 1.470334992  | 1.346630019 | 18.13283474  | 2.26E-58 | 1.57E-56 | 122.0113788 |
| CSRN1P1    | 2.078583696  | 4.073050046 | 18.12531298  | 2.46E-58 | 1.70E-56 | 121.9249296 |
| DES        | 3.046914526  | 2.22555282  | 18.12478205  | 2.48E-58 | 1.71E-56 | 121.9188278 |
| CPED1      | 1.484706144  | 1.286480207 | 18.12105554  | 2.59E-58 | 1.78E-56 | 121.8760021 |
| RSPO2      | 1.22107655   | 0.477601771 | 18.10003787  | 3.29E-58 | 2.26E-56 | 121.6345076 |
| GIMAP6     | 1.918746732  | 2.795449309 | 18.0913375   | 3.64E-58 | 2.48E-56 | 121.5345617 |
| KL         | 1.511027627  | 0.799713117 | 18.08479238  | 3.93E-58 | 2.67E-56 | 121.4593829 |
| TIE1       | 1.684026242  | 2.339568077 | 18.0639572   | 4.99E-58 | 3.38E-56 | 121.2201139 |
| FAM162B    | 1.79603594   | 1.672826932 | 18.06359072  | 5.02E-58 | 3.39E-56 | 121.215906  |
| CCL23      | 1.921907748  | 1.316580188 | 18.05907985  | 5.28E-58 | 3.55E-56 | 121.1641137 |
| TCEAL2     | 1.631713034  | 0.687017217 | 18.0438409   | 6.30E-58 | 4.22E-56 | 120.9891713 |
| CNOT11     | -1.130503611 | 4.755154151 | -18.03460042 | 7.01E-58 | 4.68E-56 | 120.8831106 |
| SELP       | 1.843247503  | 1.704795041 | 17.94552607  | 1.95E-57 | 1.30E-55 | 119.8614927 |
| OCIAD2     | -1.989893229 | 5.166357077 | -17.93543739 | 2.19E-57 | 1.45E-55 | 119.7458707 |
| GLIPR2     | 2.123072663  | 3.653123697 | 17.89383271  | 3.54E-57 | 2.33E-55 | 119.2692486 |
| SPN        | 1.968243303  | 2.128463724 | 17.88737789  | 3.81E-57 | 2.51E-55 | 119.19533   |
| KANK2      | 1.477169571  | 3.669800024 | 17.88602571  | 3.87E-57 | 2.54E-55 | 119.1798462 |
| PEAK1      | 1.207154879  | 1.610201708 | 17.87987202  | 4.16E-57 | 2.71E-55 | 119.1093844 |
| ODF3L1     | 1.023303887  | 0.608303302 | 17.86143304  | 5.14E-57 | 3.34E-55 | 118.898293  |
| ABCG2      | 1.238589037  | 1.042621122 | 17.85628908  | 5.45E-57 | 3.54E-55 | 118.8394153 |
| AFF3       | 1.358053925  | 0.71349624  | 17.8384131   | 6.70E-57 | 4.33E-55 | 118.6348442 |
| RADIL      | 1.046442805  | 0.574469284 | 17.81754598  | 8.51E-57 | 5.48E-55 | 118.3961159 |
| PLPP2      | -2.13061408  | 3.403271569 | -17.80691782 | 9.62E-57 | 6.17E-55 | 118.2745558 |
| ST6GALNAC5 | 1.771379222  | 1.454129477 | 17.77858173  | 1.33E-56 | 8.49E-55 | 117.9505614 |
| CD93       | 2.11940134   | 3.845143724 | 17.74914387  | 1.87E-56 | 1.18E-54 | 117.6141253 |
| ANGPT1     | 1.762034358  | 1.391043489 | 17.74808421  | 1.89E-56 | 1.19E-54 | 117.6020177 |
| TBX3       | 1.598885472  | 1.540149554 | 17.74434219  | 1.97E-56 | 1.24E-54 | 117.5592636 |
| SPRYD7     | 1.028528714  | 2.467243613 | 17.74371279  | 1.99E-56 | 1.24E-54 | 117.5520727 |
| DENND3     | 1.415834088  | 2.109581992 | 17.73975718  | 2.08E-56 | 1.30E-54 | 117.5068814 |
| ETV4       | -2.666047015 | 3.30271815  | -17.73290855 | 2.25E-56 | 1.40E-54 | 117.4286454 |
| FAM136A    | -1.138616322 | 3.939460909 | -17.70989126 | 2.93E-56 | 1.81E-54 | 117.1657687 |
| CTHRC1     | -3.225755602 | 4.547802017 | -17.62365809 | 7.87E-56 | 4.84E-54 | 116.1817955 |
| HBEGF      | 2.37374159   | 3.205889556 | 17.61042327  | 9.15E-56 | 5.62E-54 | 116.0309024 |
| SLIT3      | 2.046092694  | 1.656367148 | 17.59565297  | 1.08E-55 | 6.63E-54 | 115.8625422 |
| CAVIN1     | 2.107728821  | 5.668370694 | 17.59484302  | 1.09E-55 | 6.67E-54 | 115.8533112 |
| CAV2       | 2.516286009  | 3.635209125 | 17.58967633  | 1.16E-55 | 7.06E-54 | 115.7944289 |
| SYNM       | 1.243881563  | 1.379119076 | 17.57685933  | 1.34E-55 | 8.15E-54 | 115.6483821 |
| CPB2       | 3.22074962   | 1.476286894 | 17.57127721  | 1.43E-55 | 8.66E-54 | 115.5847849 |
| HEG1       | 1.997772822  | 3.13756596  | 17.53132562  | 2.26E-55 | 1.36E-53 | 115.1297908 |
| PDZD2      | 1.777695545  | 1.399472553 | 17.52083756  | 2.55E-55 | 1.53E-53 | 115.0103973 |
| B3GNT3     | -3.087249218 | 3.643926637 | -17.50628944 | 3.01E-55 | 1.80E-53 | 114.8448203 |
| PDIA4      | -1.718717887 | 6.933460156 | -17.47500459 | 4.31E-55 | 2.57E-53 | 114.4888967 |
| GUCY1A2    | 1.170405249  | 0.833955749 | 17.41903865  | 8.16E-55 | 4.84E-53 | 113.8526591 |
| HSPB6      | 2.422520834  | 2.26109319  | 17.40422436  | 9.66E-55 | 5.72E-53 | 113.6843495 |
| SPTBN1     | 1.658617436  | 4.552085949 | 17.38969646  | 1.14E-54 | 6.71E-53 | 113.5193361 |
| PNPLA6     | 1.324313371  | 3.49549958  | 17.35766543  | 1.64E-54 | 9.60E-53 | 113.1556643 |
| KIAA1324L  | 1.709792862  | 1.768848007 | 17.34941392  | 1.80E-54 | 1.05E-52 | 113.0620123 |

|          |              |             |              |          |          |             |
|----------|--------------|-------------|--------------|----------|----------|-------------|
| SESN1    | 1.395953445  | 2.325435095 | 17.33459909  | 2.14E-54 | 1.24E-52 | 112.893903  |
| BCHE     | 1.60401386   | 0.916572082 | 17.3244933   | 2.40E-54 | 1.39E-52 | 112.7792542 |
| FXYD6    | 1.591082033  | 2.11223796  | 17.29250012  | 3.45E-54 | 1.99E-52 | 112.4164327 |
| SCN7A    | 2.036708149  | 1.542612062 | 17.28644737  | 3.70E-54 | 2.13E-52 | 112.3478144 |
| RETN     | 2.990416316  | 1.871634388 | 17.2774248   | 4.10E-54 | 2.35E-52 | 112.2455419 |
| SNX22    | 1.13917776   | 1.117252906 | 17.23798083  | 6.42E-54 | 3.68E-52 | 111.7986329 |
| RAPGEF4  | 1.0027703    | 0.852804419 | 17.17085339  | 1.38E-53 | 7.84E-52 | 111.0388022 |
| TNS1     | 2.150775539  | 4.084453552 | 17.15733158  | 1.61E-53 | 9.11E-52 | 110.8858593 |
| TSPAN18  | 1.645713468  | 1.973141295 | 17.14986644  | 1.75E-53 | 9.89E-52 | 110.8014387 |
| JCAD     | 1.836548551  | 2.560323707 | 17.14934578  | 1.76E-53 | 9.92E-52 | 110.7955513 |
| TOP2A    | -2.805612445 | 3.640280117 | -17.13744001 | 2.01E-53 | 1.13E-51 | 110.6609387 |
| P2RY1    | 1.056698248  | 0.996723345 | 17.12770911  | 2.25E-53 | 1.26E-51 | 110.5509385 |
| LMCD1    | 1.37924201   | 2.186918272 | 17.08815739  | 3.52E-53 | 1.97E-51 | 110.1040429 |
| DUOX1    | 2.718431446  | 2.313852746 | 17.08656639  | 3.58E-53 | 2.00E-51 | 110.086073  |
| COX4I2   | 2.056741547  | 2.723427343 | 17.07548866  | 4.06E-53 | 2.26E-51 | 109.9609687 |
| GPM6B    | 1.510657017  | 1.397044508 | 17.06281757  | 4.69E-53 | 2.60E-51 | 109.8179022 |
| DNASE2B  | 1.238352492  | 0.559623952 | 17.05063762  | 5.39E-53 | 2.98E-51 | 109.6804134 |
| ADARB1   | 1.302963779  | 1.77450085  | 17.02400827  | 7.28E-53 | 4.01E-51 | 109.3799285 |
| COX7A1   | 1.61465377   | 2.586819795 | 16.97874505  | 1.22E-52 | 6.67E-51 | 108.8695302 |
| WFS1     | 1.591771753  | 3.912573375 | 16.97194589  | 1.31E-52 | 7.19E-51 | 108.7928997 |
| CD300C   | 1.660282933  | 1.73514325  | 16.95977972  | 1.51E-52 | 8.23E-51 | 108.6558049 |
| LAMP3    | 3.17192509   | 4.550376803 | 16.94627432  | 1.76E-52 | 9.56E-51 | 108.5036568 |
| LTBP4    | 2.095891344  | 3.723944654 | 16.87207816  | 4.06E-52 | 2.19E-50 | 107.6684972 |
| FFAR4    | 1.294527106  | 0.792982435 | 16.86816329  | 4.25E-52 | 2.28E-50 | 107.6244648 |
| CCT3     | -1.333805367 | 6.194610273 | -16.85722206 | 4.81E-52 | 2.57E-50 | 107.5014216 |
| F8       | 1.213714452  | 1.54388633  | 16.83191873  | 6.40E-52 | 3.41E-50 | 107.2169668 |
| CAMP     | 1.547188522  | 0.740731386 | 16.81261584  | 7.95E-52 | 4.23E-50 | 107.000064  |
| PAFAH1B3 | -1.970221817 | 4.390111561 | -16.80587913 | 8.58E-52 | 4.56E-50 | 106.9243845 |
| DAPK2    | 1.405479873  | 1.357109004 | 16.78257325  | 1.12E-51 | 5.91E-50 | 106.6626477 |
| CASKIN2  | 1.349900094  | 2.936966853 | 16.74567451  | 1.69E-51 | 8.91E-50 | 106.2485072 |
| LGR4     | -2.002717391 | 3.189827376 | -16.73508808 | 1.91E-51 | 9.99E-50 | 106.1297453 |
| FGFR4    | 2.283133381  | 1.914617153 | 16.72749316  | 2.08E-51 | 1.08E-49 | 106.0445589 |
| GFOD1    | 1.006426557  | 0.922260288 | 16.71710406  | 2.33E-51 | 1.22E-49 | 105.9280535 |
| IL3RA    | 1.485630329  | 2.928720092 | 16.68309706  | 3.42E-51 | 1.77E-49 | 105.5468656 |
| TACC1    | 1.753889671  | 3.212568782 | 16.66109318  | 4.38E-51 | 2.26E-49 | 105.3003636 |
| NOTCH4   | 1.360167775  | 1.852682162 | 16.62003935  | 6.96E-51 | 3.57E-49 | 104.8407511 |
| PRAM1    | 1.480234935  | 1.362321605 | 16.61445515  | 7.41E-51 | 3.79E-49 | 104.7782643 |
| NDST1    | 1.40834628   | 3.613774713 | 16.59374714  | 9.35E-51 | 4.77E-49 | 104.5466065 |
| SFTPC    | 7.721358434  | 5.952172636 | 16.58605448  | 1.02E-50 | 5.19E-49 | 104.4605753 |
| FOLR3    | 1.396999087  | 0.479735983 | 16.52093099  | 2.12E-50 | 1.07E-48 | 103.732822  |
| TRPV2    | 1.722825822  | 3.104892803 | 16.49472519  | 2.84E-50 | 1.43E-48 | 103.4402564 |
| SFXN4    | -1.272307196 | 3.734730811 | -16.4924958  | 2.91E-50 | 1.46E-48 | 103.4153747 |
| SLC5A9   | 1.274809375  | 0.590841451 | 16.48792354  | 3.07E-50 | 1.54E-48 | 103.3643485 |
| TBX4     | 1.837753973  | 1.773066422 | 16.47744501  | 3.45E-50 | 1.72E-48 | 103.2474274 |
| ITGA8    | 1.747408428  | 1.694099734 | 16.47728701  | 3.45E-50 | 1.72E-48 | 103.2456647 |
| FLAD1    | -1.265773579 | 3.701169011 | -16.44915516 | 4.73E-50 | 2.35E-48 | 102.9318964 |
| MANF     | -1.356988105 | 5.203198428 | -16.44297951 | 5.07E-50 | 2.52E-48 | 102.8630419 |
| GYPC     | 1.594854675  | 2.809876211 | 16.44041726  | 5.22E-50 | 2.58E-48 | 102.8344771 |
| CDC20    | -2.734346343 | 3.49765086  | -16.43767012 | 5.38E-50 | 2.66E-48 | 102.8038529 |
| GPX3     | 2.497723706  | 5.844887537 | 16.43542885  | 5.52E-50 | 2.72E-48 | 102.7788693 |
| FGF2     | 1.115947575  | 0.744496349 | 16.43231105  | 5.72E-50 | 2.81E-48 | 102.744117  |
| TMEM204  | 1.599694698  | 3.269418771 | 16.41171938  | 7.20E-50 | 3.52E-48 | 102.5146527 |
| CXCR1    | 1.124581521  | 0.504310051 | 16.39803691  | 8.39E-50 | 4.09E-48 | 102.3622381 |
| MS4A7    | 2.100838375  | 3.092661375 | 16.39450775  | 8.73E-50 | 4.24E-48 | 102.3229328 |
| FGR      | 1.913977543  | 2.864268183 | 16.36815789  | 1.17E-49 | 5.68E-48 | 102.0295622 |
| TMEM184A | -1.904262886 | 2.41246472  | -16.34481619 | 1.52E-49 | 7.36E-48 | 101.7698252 |

|          |              |             |              |          |          |             |
|----------|--------------|-------------|--------------|----------|----------|-------------|
| FLI1     | 1.343132281  | 1.930623043 | 16.29160997  | 2.76E-49 | 1.32E-47 | 101.1782689 |
| TRAP1    | -1.070703029 | 3.549902627 | -16.27769215 | 3.22E-49 | 1.54E-47 | 101.0236436 |
| GGCT     | -1.563604763 | 4.841963286 | -16.23081106 | 5.43E-49 | 2.58E-47 | 100.5031556 |
| AMOTL1   | 1.573704342  | 2.347452658 | 16.2149221   | 6.48E-49 | 3.07E-47 | 100.3268764 |
| EIF2AK1  | -1.026979509 | 5.397519038 | -16.19044258 | 8.51E-49 | 4.02E-47 | 100.055414  |
| PPP1R15A | 1.647220498  | 4.857138428 | 16.18171889  | 9.38E-49 | 4.42E-47 | 99.95871041 |
| ESAM     | 1.979760365  | 4.026063323 | 16.16450096  | 1.14E-48 | 5.34E-47 | 99.76790322 |
| EML1     | 1.176439773  | 1.298714377 | 16.13660603  | 1.55E-48 | 7.27E-47 | 99.45893453 |
| BCL6B    | 1.356094237  | 2.049177001 | 16.11822652  | 1.90E-48 | 8.88E-47 | 99.25546861 |
| AFAP1L1  | 1.319043534  | 1.933036945 | 16.05951357  | 3.65E-48 | 1.70E-46 | 98.60608193 |
| CCNB1    | -2.255850506 | 3.566228797 | -16.03361847 | 4.87E-48 | 2.26E-46 | 98.31995559 |
| ITIH5    | 1.566500654  | 1.158729215 | 16.0302293   | 5.06E-48 | 2.34E-46 | 98.28252008 |
| DOCK4    | 1.274169262  | 1.875056957 | 16.02338712  | 5.45E-48 | 2.50E-46 | 98.20695294 |
| ADCY4    | 1.030268066  | 1.115490792 | 16.00712973  | 6.53E-48 | 2.99E-46 | 98.02745035 |
| VSIR     | 1.474073182  | 3.487524695 | 16.00339818  | 6.81E-48 | 3.10E-46 | 97.98625892 |
| LHFPL6   | 1.584147309  | 3.741487546 | 15.99677999  | 7.33E-48 | 3.33E-46 | 97.91321181 |
| ZWINT    | -2.041359149 | 3.406035479 | -15.98474326 | 8.37E-48 | 3.79E-46 | 97.78038785 |
| CBLC     | -2.29277326  | 3.251644434 | -15.97456164 | 9.37E-48 | 4.22E-46 | 97.66806441 |
| WASF3    | 1.440087292  | 1.480764618 | 15.96859816  | 1.00E-47 | 4.50E-46 | 97.6022881  |
| RCAN1    | 1.481436273  | 2.689423827 | 15.95331959  | 1.19E-47 | 5.31E-46 | 97.43381044 |
| KAT2A    | -1.549180987 | 4.031726343 | -15.95007596 | 1.23E-47 | 5.49E-46 | 97.39805065 |
| CASS4    | 1.335278592  | 1.400465296 | 15.94939985  | 1.24E-47 | 5.52E-46 | 97.3905971  |
| MSRB3    | 1.667029266  | 2.334935076 | 15.93940924  | 1.38E-47 | 6.15E-46 | 97.28047376 |
| PDE5A    | 1.297275174  | 1.645368138 | 15.93474589  | 1.46E-47 | 6.46E-46 | 97.2290801  |
| RECK     | 1.122804277  | 1.531904987 | 15.92829067  | 1.56E-47 | 6.92E-46 | 97.15794823 |
| RILPL2   | 1.087497658  | 2.431185433 | 15.91798818  | 1.75E-47 | 7.74E-46 | 97.04444499 |
| PTH1R    | 1.151580719  | 0.956978608 | 15.91752437  | 1.76E-47 | 7.76E-46 | 97.03933581 |
| SPP1     | -4.295400461 | 6.472260592 | -15.90940339 | 1.93E-47 | 8.48E-46 | 96.94988739 |
| SERINC1  | 1.094233846  | 6.000432611 | 15.89198919  | 2.34E-47 | 1.03E-45 | 96.75813798 |
| GNL3     | -1.101819834 | 4.587184342 | -15.87112075 | 2.95E-47 | 1.29E-45 | 96.52846005 |
| SEMA6D   | 1.219392733  | 0.746344894 | 15.85965748  | 3.34E-47 | 1.46E-45 | 96.40234502 |
| LILRA5   | 1.610118595  | 1.629965622 | 15.85416275  | 3.55E-47 | 1.55E-45 | 96.34190628 |
| MSR1     | 2.287443077  | 3.033771744 | 15.8520142   | 3.64E-47 | 1.58E-45 | 96.31827578 |
| NIM1K    | 1.006832289  | 0.522189381 | 15.84385977  | 3.98E-47 | 1.73E-45 | 96.22860171 |
| OLR1     | 2.639353836  | 3.433958585 | 15.83940522  | 4.18E-47 | 1.81E-45 | 96.17962258 |
| KDELR3   | -1.951738142 | 4.416793805 | -15.82747084 | 4.77E-47 | 2.06E-45 | 96.04842709 |
| FAM83A   | -3.469759275 | 3.37473065  | -15.81588334 | 5.42E-47 | 2.33E-45 | 95.9210815  |
| TRAF4    | -1.301452879 | 4.503495347 | -15.81494141 | 5.48E-47 | 2.34E-45 | 95.91073139 |
| ROR1     | 1.330584556  | 1.292404864 | 15.78636984  | 7.51E-47 | 3.20E-45 | 95.59689504 |
| KLF6     | 1.671909274  | 4.886624659 | 15.78514568  | 7.61E-47 | 3.24E-45 | 95.58345362 |
| HMGB3    | -2.887154911 | 5.380731087 | -15.780954   | 7.97E-47 | 3.38E-45 | 95.53743126 |
| CBX7     | 1.392889579  | 2.221466295 | 15.77670863  | 8.35E-47 | 3.54E-45 | 95.49082433 |
| MSTO1    | -1.044032356 | 2.133173779 | -15.75339184 | 1.08E-46 | 4.54E-45 | 95.2349335  |
| MDK      | -2.741909291 | 6.497307706 | -15.74988701 | 1.12E-46 | 4.71E-45 | 95.19648241 |
| VWF      | 2.329393995  | 4.278190327 | 15.74388987  | 1.20E-46 | 5.03E-45 | 95.13069637 |
| OSCAR    | 2.027561007  | 2.679988329 | 15.73861247  | 1.27E-46 | 5.30E-45 | 95.07281364 |
| SPAG4    | -1.894459799 | 2.617081607 | -15.72649972 | 1.45E-46 | 6.05E-45 | 94.93998953 |
| QKI      | 1.200541369  | 2.824774649 | 15.71308517  | 1.68E-46 | 7.00E-45 | 94.79293729 |
| MRPL3    | -1.053246911 | 5.002027961 | -15.71233749 | 1.70E-46 | 7.04E-45 | 94.78474262 |
| RXRG     | 1.278393826  | 0.574491572 | 15.71047825  | 1.73E-46 | 7.17E-45 | 94.76436566 |
| ADTRP    | 1.442204149  | 1.069457452 | 15.70353206  | 1.87E-46 | 7.72E-45 | 94.68824495 |
| SLC50A1  | -1.648180651 | 5.280930181 | -15.69649018 | 2.02E-46 | 8.33E-45 | 94.61108919 |
| MMRN1    | 1.685593442  | 1.382356989 | 15.69511268  | 2.05E-46 | 8.44E-45 | 94.59599798 |
| PCOLCE2  | 2.028741366  | 1.452013395 | 15.68167983  | 2.38E-46 | 9.76E-45 | 94.44886146 |
| NPM3     | -1.560513858 | 4.404692308 | -15.66831622 | 2.76E-46 | 1.13E-44 | 94.30253294 |
| MARCO    | 3.630981515  | 4.341736525 | 15.66669486  | 2.81E-46 | 1.15E-44 | 94.2847827  |

|            |              |             |              |          |          |             |
|------------|--------------|-------------|--------------|----------|----------|-------------|
| CCL14      | 1.01073776   | 0.557956704 | 15.66383902  | 2.90E-46 | 1.18E-44 | 94.25351968 |
| S100A3     | 1.664094423  | 1.478793663 | 15.6560334   | 3.16E-46 | 1.28E-44 | 94.1680825  |
| CRYAB      | 1.787582372  | 2.10810248  | 15.64809977  | 3.44E-46 | 1.39E-44 | 94.08126146 |
| CRTAC1     | 3.148589836  | 2.688029967 | 15.64479803  | 3.57E-46 | 1.44E-44 | 94.04513435 |
| TGFBR2     | 1.706209798  | 5.308585055 | 15.63347483  | 4.04E-46 | 1.63E-44 | 93.92126075 |
| ST6GALNAC6 | 1.216980174  | 3.62382749  | 15.63313049  | 4.06E-46 | 1.63E-44 | 93.91749427 |
| C2orf40    | 1.954385659  | 1.030012802 | 15.63186862  | 4.12E-46 | 1.65E-44 | 93.90369205 |
| DLC1       | 2.2447873    | 2.929226039 | 15.62028083  | 4.68E-46 | 1.87E-44 | 93.77696607 |
| NARF       | -1.11314857  | 3.23559849  | -15.62024586 | 4.68E-46 | 1.87E-44 | 93.77658363 |
| RMI2       | -1.584846586 | 2.462427613 | -15.61071612 | 5.19E-46 | 2.07E-44 | 93.67239315 |
| WIF1       | 4.012511172  | 2.430572082 | 15.60750296  | 5.38E-46 | 2.14E-44 | 93.63726877 |
| RNF144B    | 1.60931535   | 2.936900692 | 15.60534706  | 5.51E-46 | 2.19E-44 | 93.61370337 |
| NLN        | -1.010648747 | 2.085087124 | -15.60083669 | 5.79E-46 | 2.29E-44 | 93.56440627 |
| SPTBN2     | -1.705841699 | 2.518073391 | -15.58796297 | 6.67E-46 | 2.63E-44 | 93.42373138 |
| LDLR       | 1.854102096  | 3.79381509  | 15.57608338  | 7.60E-46 | 2.98E-44 | 93.29396108 |
| ZBED2      | 1.81043272   | 1.516730611 | 15.57551424  | 7.64E-46 | 3.00E-44 | 93.28774495 |
| MARCKSL1   | -1.923069871 | 6.576507922 | -15.56930701 | 8.18E-46 | 3.20E-44 | 93.21995521 |
| PREX2      | 1.062152814  | 0.788264724 | 15.55087648  | 1.00E-45 | 3.91E-44 | 93.01873781 |
| ADM2       | -1.757496056 | 1.989217892 | -15.53823038 | 1.15E-45 | 4.49E-44 | 92.88072815 |
| AQP4       | 3.751311263  | 3.32574673  | 15.53234469  | 1.23E-45 | 4.77E-44 | 92.81651183 |
| DENND2A    | 1.314629567  | 1.479872317 | 15.53214997  | 1.23E-45 | 4.78E-44 | 92.81438745 |
| SLC1A1     | 2.184043979  | 2.410385065 | 15.5059179   | 1.64E-45 | 6.33E-44 | 92.52830131 |
| POLR2H     | -1.117123746 | 4.006638387 | -15.49436477 | 1.86E-45 | 7.17E-44 | 92.40236557 |
| LGALS1     | 1.605393938  | 2.62374623  | 15.49190406  | 1.91E-45 | 7.35E-44 | 92.37554729 |
| ANKRD29    | 2.051548177  | 1.771074121 | 15.4812406   | 2.15E-45 | 8.24E-44 | 92.25935078 |
| IQANK1     | -1.836468879 | 3.381906823 | -15.47790412 | 2.23E-45 | 8.53E-44 | 92.22300088 |
| BMPR2      | 1.139131591  | 3.359580468 | 15.45924093  | 2.73E-45 | 1.04E-43 | 92.01972999 |
| SVEP1      | 1.593629376  | 1.358603811 | 15.44622538  | 3.15E-45 | 1.20E-43 | 91.87802984 |
| PPAT       | -1.237364095 | 2.096846457 | -15.44349684 | 3.25E-45 | 1.24E-43 | 91.84833049 |
| CDCA8      | -2.014922209 | 2.716002154 | -15.43727702 | 3.48E-45 | 1.32E-43 | 91.78063746 |
| NHSL1      | 1.457152852  | 1.945986342 | 15.4334938   | 3.62E-45 | 1.37E-43 | 91.73946858 |
| KIF1C      | 1.206703445  | 4.183570742 | 15.43023078  | 3.75E-45 | 1.42E-43 | 91.7039638  |
| ADAMTS1    | 2.017604526  | 2.675584014 | 15.41405508  | 4.48E-45 | 1.69E-43 | 91.52800206 |
| B4GALT2    | -1.169871915 | 3.99919832  | -15.40706595 | 4.84E-45 | 1.82E-43 | 91.45199658 |
| IL1RL1     | 1.957473233  | 0.914361454 | 15.40639014  | 4.87E-45 | 1.83E-43 | 91.44464803 |
| UBE2C      | -3.075236614 | 4.034769084 | -15.40052133 | 5.19E-45 | 1.95E-43 | 91.38083802 |
| SLC35F2    | -1.58251516  | 3.378551755 | -15.39702104 | 5.40E-45 | 2.02E-43 | 91.34278505 |
| JPT2       | -1.130042456 | 5.035590446 | -15.39648111 | 5.43E-45 | 2.03E-43 | 91.33691557 |
| SLC25A10   | -1.57877635  | 2.697929321 | -15.35663706 | 8.39E-45 | 3.12E-43 | 90.9040137  |
| MYO19      | -1.133460359 | 2.125951599 | -15.3559029  | 8.46E-45 | 3.14E-43 | 90.89604144 |
| WISP2      | 1.664575117  | 1.645963591 | 15.35259812  | 8.77E-45 | 3.24E-43 | 90.86015693 |
| BZW2       | -1.266481257 | 4.586127416 | -15.33434377 | 1.07E-44 | 3.95E-43 | 90.66200172 |
| NUSAP1     | -1.926384473 | 3.10780278  | -15.31910466 | 1.26E-44 | 4.65E-43 | 90.49665256 |
| LEPR       | 1.525530662  | 1.429030122 | 15.31874537  | 1.27E-44 | 4.66E-43 | 90.49275498 |
| KRT4       | 2.561245234  | 1.251902558 | 15.30086475  | 1.54E-44 | 5.64E-43 | 90.2988338  |
| MFAP4      | 2.960712434  | 5.120389421 | 15.29208281  | 1.70E-44 | 6.19E-43 | 90.2036254  |
| TNFRSF21   | -1.846619043 | 5.481722012 | -15.28291311 | 1.87E-44 | 6.83E-43 | 90.10423747 |
| TFB2M      | -1.097269825 | 3.675691042 | -15.2573176  | 2.48E-44 | 8.97E-43 | 89.82694639 |
| FERMT2     | 1.212190185  | 2.742539149 | 15.25399183  | 2.57E-44 | 9.29E-43 | 89.79093072 |
| PLPP3      | 1.261052571  | 3.793610415 | 15.24917599  | 2.71E-44 | 9.77E-43 | 89.73878447 |
| PHACTR2    | 1.282345608  | 2.147338848 | 15.24878381  | 2.72E-44 | 9.79E-43 | 89.73453817 |
| AGTR2      | 2.447079917  | 1.14877273  | 15.23788264  | 3.06E-44 | 1.10E-42 | 89.6165264  |
| CNRIP1     | 1.097564752  | 1.656033704 | 15.23327358  | 3.22E-44 | 1.16E-42 | 89.56664117 |
| METTL7A    | 1.963379385  | 4.222195824 | 15.23144275  | 3.28E-44 | 1.18E-42 | 89.54682733 |
| IQGAP3     | -1.861622291 | 2.100781365 | -15.20783321 | 4.24E-44 | 1.52E-42 | 89.29140688 |
| KCNK3      | 2.056714161  | 1.467516211 | 15.20573707  | 4.34E-44 | 1.55E-42 | 89.26873773 |

|          |              |             |              |          |          |             |
|----------|--------------|-------------|--------------|----------|----------|-------------|
| SLC25A39 | -1.232010221 | 5.545074202 | -15.20541883 | 4.35E-44 | 1.55E-42 | 89.26529625 |
| PCDH12   | 1.280186599  | 1.967796588 | 15.2023054   | 4.50E-44 | 1.60E-42 | 89.23162816 |
| KIF20A   | -1.788270751 | 2.199906503 | -15.18187525 | 5.62E-44 | 2.00E-42 | 89.010773   |
| FUT2     | -1.977582445 | 2.529005785 | -15.18089631 | 5.68E-44 | 2.02E-42 | 89.00019352 |
| DKC1     | -1.084121647 | 4.133852325 | -15.15430317 | 7.59E-44 | 2.68E-42 | 88.71291115 |
| EPCAM    | -1.580118468 | 7.291320955 | -15.1367934  | 9.17E-44 | 3.23E-42 | 88.52387209 |
| TEDC2    | -1.358738034 | 1.461265403 | -15.13197764 | 9.67E-44 | 3.40E-42 | 88.47189647 |
| SNRPE    | -1.136990587 | 5.00366581  | -15.1287735  | 1.00E-43 | 3.51E-42 | 88.43731861 |
| GAB1     | 1.053917048  | 1.786150292 | 15.12073712  | 1.09E-43 | 3.82E-42 | 88.35060696 |
| C8B      | 1.799660431  | 0.738919709 | 15.11969878  | 1.10E-43 | 3.86E-42 | 88.3394049  |
| TK1      | -2.281665258 | 4.528039841 | -15.11076188 | 1.22E-43 | 4.25E-42 | 88.2430026  |
| CDH13    | 1.14050776   | 1.032758133 | 15.09818544  | 1.39E-43 | 4.86E-42 | 88.10738197 |
| PEBP4    | 3.800566444  | 3.159245566 | 15.08082413  | 1.68E-43 | 5.85E-42 | 87.92024202 |
| CD34     | 1.41560492   | 2.680643749 | 15.06835659  | 1.93E-43 | 6.69E-42 | 87.78590976 |
| SYNPO    | 1.649158409  | 3.687668526 | 15.06531359  | 1.99E-43 | 6.89E-42 | 87.75312998 |
| P4HB     | -1.156163793 | 7.815653048 | -15.06529071 | 1.99E-43 | 6.89E-42 | 87.75288346 |
| MYADM    | 1.792856336  | 5.288122082 | 15.04869864  | 2.38E-43 | 8.23E-42 | 87.57420083 |
| TPX2     | -2.545373583 | 3.374743192 | -15.0416462  | 2.57E-43 | 8.86E-42 | 87.49827764 |
| ITM2A    | 1.890243606  | 3.268178285 | 15.02893339  | 2.95E-43 | 1.02E-41 | 87.36145638 |
| KLF4     | 2.247334213  | 3.208955639 | 15.02332795  | 3.14E-43 | 1.08E-41 | 87.30114384 |
| GNAQ     | 1.098800373  | 3.897598098 | 15.01877517  | 3.29E-43 | 1.13E-41 | 87.25216476 |
| GPBR1    | 1.339816282  | 1.02526874  | 15.00554998  | 3.80E-43 | 1.30E-41 | 87.10992358 |
| FRY      | 1.111921036  | 1.481229838 | 14.96940169  | 5.61E-43 | 1.92E-41 | 86.72141441 |
| CCBE1    | 1.69040212   | 0.981208242 | 14.9336646   | 8.26E-43 | 2.81E-41 | 86.33772555 |
| PLK1     | -1.860138561 | 2.288314146 | -14.92898346 | 8.68E-43 | 2.95E-41 | 86.2874964  |
| GKN2     | 3.426195868  | 1.815995891 | 14.92285612  | 9.28E-43 | 3.14E-41 | 86.22175984 |
| CD52     | 2.398466081  | 5.315052281 | 14.92046851  | 9.52E-43 | 3.22E-41 | 86.19614776 |
| CFD      | 2.548557581  | 4.129219539 | 14.91927774  | 9.64E-43 | 3.25E-41 | 86.183375   |
| BMPER    | 1.124225824  | 0.556051718 | 14.91649923  | 9.94E-43 | 3.35E-41 | 86.15357301 |
| C5AR1    | 1.834476697  | 3.259067728 | 14.91541319  | 1.01E-42 | 3.38E-41 | 86.14192491 |
| C1orf162 | 1.668825871  | 3.054993745 | 14.91349639  | 1.03E-42 | 3.44E-41 | 86.12136762 |
| SGCA     | 1.517019353  | 1.424598634 | 14.91139721  | 1.05E-42 | 3.51E-41 | 86.09885573 |
| TBX2     | 1.613748505  | 2.373322444 | 14.90220023  | 1.16E-42 | 3.87E-41 | 86.00024214 |
| RASGEF1B | 1.089812953  | 1.719565488 | 14.89548891  | 1.25E-42 | 4.16E-41 | 85.92829763 |
| RASGRF1  | 1.904589438  | 1.257772174 | 14.88822361  | 1.35E-42 | 4.49E-41 | 85.85043053 |
| IL33     | 2.311515951  | 2.942731221 | 14.88516364  | 1.39E-42 | 4.63E-41 | 85.81763982 |
| STAC     | 1.637392058  | 1.383816762 | 14.87562715  | 1.54E-42 | 5.12E-41 | 85.71546542 |
| SERINC2  | -1.882017096 | 5.441450294 | -14.86879229 | 1.66E-42 | 5.50E-41 | 85.64225408 |
| ADGRL2   | 1.709161357  | 2.530936176 | 14.85950334  | 1.84E-42 | 6.07E-41 | 85.54277972 |
| EZH2     | -1.556894733 | 2.206138401 | -14.85018038 | 2.03E-42 | 6.70E-41 | 85.44296873 |
| TMOD1    | 1.083732321  | 0.990461239 | 14.84179016  | 2.22E-42 | 7.31E-41 | 85.35316721 |
| SEC14L6  | 1.817354577  | 1.45046555  | 14.81945104  | 2.82E-42 | 9.26E-41 | 85.11417827 |
| SSTR1    | 1.5775211    | 0.892743968 | 14.81486852  | 2.97E-42 | 9.72E-41 | 85.06517318 |
| HSD17B6  | 2.803543239  | 2.963017451 | 14.81066397  | 3.10E-42 | 1.01E-40 | 85.02021597 |
| ACE      | 1.524404096  | 2.527251248 | 14.80399187  | 3.34E-42 | 1.09E-40 | 84.94888604 |
| SYNPO2   | 1.22155128   | 1.166664801 | 14.79929289  | 3.51E-42 | 1.14E-40 | 84.89865882 |
| HACD4    | 1.135178211  | 1.72642272  | 14.79625532  | 3.62E-42 | 1.17E-40 | 84.86619416 |
| ARHGEF16 | -1.36350973  | 2.808788171 | -14.78312144 | 4.17E-42 | 1.35E-40 | 84.72585713 |
| SPAG5    | -1.837859615 | 2.357438706 | -14.76580294 | 5.03E-42 | 1.61E-40 | 84.54089169 |
| CBX3     | -1.061745978 | 5.389165779 | -14.74850269 | 6.05E-42 | 1.94E-40 | 84.35621779 |
| SAPCD2   | -1.824737788 | 2.014826901 | -14.74777486 | 6.10E-42 | 1.95E-40 | 84.34845063 |
| CCNB2    | -1.930713836 | 2.576795185 | -14.74393876 | 6.36E-42 | 2.03E-40 | 84.30751559 |
| BIRC5    | -2.370923691 | 2.919745798 | -14.74271287 | 6.44E-42 | 2.05E-40 | 84.29443519 |
| RRM2     | -2.220054338 | 2.996420045 | -14.74189239 | 6.50E-42 | 2.07E-40 | 84.28568079 |
| PSMG3    | -1.4121402   | 4.231989499 | -14.73407673 | 7.06E-42 | 2.25E-40 | 84.20229985 |
| EPN3     | -1.6937576   | 2.057361467 | -14.73137121 | 7.27E-42 | 2.31E-40 | 84.17344081 |

|           |              |             |              |          |          |             |
|-----------|--------------|-------------|--------------|----------|----------|-------------|
| E2F3      | -1.115605512 | 2.624715728 | -14.730686   | 7.33E-42 | 2.32E-40 | 84.16613224 |
| PLEK2     | -1.950631404 | 3.17845226  | -14.72714393 | 7.61E-42 | 2.41E-40 | 84.12835428 |
| PPP1R14A  | 1.720989243  | 2.577469637 | 14.71803906  | 8.39E-42 | 2.65E-40 | 84.03126489 |
| SOX4      | -1.625617958 | 5.118795328 | -14.70892006 | 9.25E-42 | 2.92E-40 | 83.93405189 |
| MFNG      | 1.341767698  | 2.746115171 | 14.70563811  | 9.58E-42 | 3.01E-40 | 83.89907132 |
| HIST1H2BD | -2.10797325  | 4.101209585 | -14.67662619 | 1.31E-41 | 4.09E-40 | 83.59000135 |
| PID1      | 1.882555266  | 2.403545651 | 14.67080696  | 1.39E-41 | 4.35E-40 | 83.52804096 |
| RSPO4     | 1.432984005  | 0.872630475 | 14.66885781  | 1.42E-41 | 4.42E-40 | 83.50728986 |
| SFRP5     | 1.555631644  | 0.695961682 | 14.66881911  | 1.42E-41 | 4.42E-40 | 83.50687788 |
| GIMAP7    | 1.753167783  | 3.488998925 | 14.66066722  | 1.55E-41 | 4.81E-40 | 83.42010442 |
| ITPRIP    | 1.347586485  | 2.589801032 | 14.66023828  | 1.56E-41 | 4.82E-40 | 83.41553918 |
| JDP2      | 1.106862881  | 2.570070405 | 14.65988148  | 1.56E-41 | 4.83E-40 | 83.4117417  |
| SPARCL1   | 1.990679302  | 5.516190266 | 14.65900318  | 1.58E-41 | 4.87E-40 | 83.40239407 |
| TOM1L2    | 1.170285463  | 2.849656702 | 14.65396367  | 1.67E-41 | 5.13E-40 | 83.34876422 |
| HSPB8     | 2.000757654  | 3.304184779 | 14.64659043  | 1.80E-41 | 5.53E-40 | 83.27031425 |
| GAPDH     | -1.641912542 | 9.201819891 | -14.63365348 | 2.07E-41 | 6.34E-40 | 83.13271034 |
| COL10A1   | -2.896412109 | 3.150328306 | -14.63106591 | 2.13E-41 | 6.50E-40 | 83.10519431 |
| TMEM47    | 1.566450856  | 2.505814909 | 14.58117984  | 3.63E-41 | 1.10E-39 | 82.57514095 |
| IQC�      | 1.224158111  | 0.8169441   | 14.57566795  | 3.85E-41 | 1.16E-39 | 82.51662608 |
| VSIG4     | 2.536894482  | 4.342840272 | 14.5709345   | 4.05E-41 | 1.22E-39 | 82.4663834  |
| S1PR4     | 1.464574458  | 2.22942944  | 14.56223898  | 4.44E-41 | 1.34E-39 | 82.37410501 |
| JPT1      | -1.561177978 | 5.254781871 | -14.5565818  | 4.72E-41 | 1.42E-39 | 82.31408361 |
| CAB39L    | 1.059153342  | 1.838961607 | 14.53951645  | 5.66E-41 | 1.69E-39 | 82.13308864 |
| P3H4      | -1.634969387 | 3.265277929 | -14.53757448 | 5.77E-41 | 1.73E-39 | 82.11249835 |
| ASF1B     | -1.751235414 | 2.857528202 | -14.51867756 | 7.06E-41 | 2.10E-39 | 81.91220364 |
| NECTIN4   | -1.979654395 | 3.940879802 | -14.49528117 | 9.06E-41 | 2.69E-39 | 81.6643835  |
| MYL9      | 1.7688912    | 5.78551909  | 14.48732647  | 9.86E-41 | 2.92E-39 | 81.5801673  |
| ANXA3     | 2.002924042  | 3.447738993 | 14.47406533  | 1.14E-40 | 3.35E-39 | 81.43981938 |
| TMEM273   | 1.300169673  | 1.934693276 | 14.4682545   | 1.21E-40 | 3.56E-39 | 81.3783398  |
| SAMD10    | -1.265488318 | 2.457222499 | -14.46360709 | 1.27E-40 | 3.74E-39 | 81.32917756 |
| SLC2A1    | -2.685092176 | 4.343977819 | -14.45387285 | 1.41E-40 | 4.14E-39 | 81.22622852 |
| C11orf80  | -1.134452855 | 2.684894187 | -14.4450492  | 1.55E-40 | 4.54E-39 | 81.13293751 |
| PDK4      | 2.459319156  | 3.225384995 | 14.444012    | 1.56E-40 | 4.58E-39 | 81.1219731  |
| RECQL4    | -1.804895144 | 2.367386171 | -14.44282245 | 1.58E-40 | 4.63E-39 | 81.10939864 |
| MCM4      | -1.738525844 | 3.454486731 | -14.43467197 | 1.73E-40 | 5.04E-39 | 81.02325451 |
| ACOXL     | 1.243028228  | 0.920238858 | 14.42005803  | 2.02E-40 | 5.88E-39 | 80.86885331 |
| CEP55     | -1.993486845 | 2.538335103 | -14.41839334 | 2.05E-40 | 5.97E-39 | 80.8512699  |
| PAK1      | -1.076897613 | 3.75003386  | -14.41415713 | 2.15E-40 | 6.24E-39 | 80.80652892 |
| ENG       | 1.532755074  | 5.262354759 | 14.41358405  | 2.16E-40 | 6.27E-39 | 80.80047682 |
| ADAMTSL4  | 1.719111642  | 2.275056995 | 14.40407341  | 2.39E-40 | 6.92E-39 | 80.70005379 |
| GPT2      | -2.179002818 | 2.982437719 | -14.38429613 | 2.95E-40 | 8.48E-39 | 80.49132393 |
| SLC39A11  | -1.183890469 | 3.600481338 | -14.37839579 | 3.14E-40 | 9.00E-39 | 80.42907749 |
| HSPE1     | -1.257125192 | 5.300321674 | -14.3777595  | 3.16E-40 | 9.05E-39 | 80.42236558 |
| GALNT7    | -1.391846518 | 3.399988509 | -14.36521997 | 3.61E-40 | 1.03E-38 | 80.29012056 |
| HSPD1     | -1.253350025 | 6.116359854 | -14.35427386 | 4.05E-40 | 1.16E-38 | 80.1747242  |
| MYBL2     | -2.791798881 | 3.456381947 | -14.34458516 | 4.49E-40 | 1.28E-38 | 80.07261812 |
| GAS6      | 1.798282386  | 4.1086514   | 14.34422891  | 4.51E-40 | 1.28E-38 | 80.06886433 |
| DBNDD1    | -1.474947203 | 2.721881028 | -14.34336281 | 4.55E-40 | 1.29E-38 | 80.05973851 |
| ZNF106    | 1.133040717  | 2.767354492 | 14.33248542  | 5.10E-40 | 1.44E-38 | 79.94514831 |
| PGM5      | 1.3766833    | 1.223958931 | 14.32626382  | 5.45E-40 | 1.54E-38 | 79.87962389 |
| ERO1A     | -1.70753232  | 4.578420034 | -14.31914683 | 5.88E-40 | 1.65E-38 | 79.80468583 |
| FIBIN     | 1.946651025  | 2.294205622 | 14.31206943  | 6.34E-40 | 1.78E-38 | 79.73018207 |
| VAR5      | -1.148873477 | 4.362856744 | -14.30507034 | 6.82E-40 | 1.91E-38 | 79.65651964 |
| PHKA1     | -1.121706257 | 2.159086915 | -14.29345764 | 7.71E-40 | 2.16E-38 | 79.53433846 |
| HYAL2     | 1.046306619  | 4.131222479 | 14.27835399  | 9.05E-40 | 2.53E-38 | 79.37549779 |
| CHRDL1    | 2.409702694  | 2.322293919 | 14.27409965  | 9.47E-40 | 2.63E-38 | 79.33077042 |

|          |              |             |              |          |          |             |
|----------|--------------|-------------|--------------|----------|----------|-------------|
| KIF2C    | -2.01108069  | 2.38541272  | -14.26052248 | 1.09E-39 | 3.03E-38 | 79.18807124 |
| RBMS2    | 1.100522336  | 3.183752768 | 14.25976605  | 1.10E-39 | 3.05E-38 | 79.18012288 |
| KLF9     | 1.500946883  | 3.531903743 | 14.23587864  | 1.42E-39 | 3.91E-38 | 78.92922302 |
| MRC1     | 2.666053775  | 3.886488671 | 14.22412844  | 1.60E-39 | 4.42E-38 | 78.80587886 |
| SHC3     | 1.141185402  | 0.963009504 | 14.21675482  | 1.73E-39 | 4.77E-38 | 78.72850127 |
| DOK2     | 1.776133877  | 3.04539862  | 14.19567816  | 2.17E-39 | 5.95E-38 | 78.50743142 |
| ILF2     | -1.089481453 | 6.540694874 | -14.18799922 | 2.35E-39 | 6.44E-38 | 78.42692701 |
| GATA6    | 1.716497751  | 2.118866759 | 14.18157925  | 2.51E-39 | 6.87E-38 | 78.35963747 |
| CXorf36  | 1.136614477  | 1.588663601 | 14.17980917  | 2.56E-39 | 6.99E-38 | 78.34108723 |
| DCAF13   | -1.056241238 | 2.679214049 | -14.17079322 | 2.82E-39 | 7.66E-38 | 78.24661865 |
| IRAK1    | -1.207710468 | 5.335694018 | -14.1670834  | 2.93E-39 | 7.96E-38 | 78.20775563 |
| NDRG4    | 1.229424528  | 0.990665583 | 14.14949937  | 3.52E-39 | 9.56E-38 | 78.023617   |
| HMGAI1   | -2.026148042 | 6.318118345 | -14.13363973 | 4.16E-39 | 1.12E-37 | 77.85763004 |
| FBLN5    | 1.861979088  | 3.308984089 | 14.12689978  | 4.47E-39 | 1.20E-37 | 77.7871168  |
| WNT7A    | 1.453065306  | 0.663885411 | 14.12568475  | 4.53E-39 | 1.22E-37 | 77.77440699 |
| PCLAF    | -1.632850164 | 2.142251083 | -14.09319773 | 6.37E-39 | 1.71E-37 | 77.43476955 |
| KDELR2   | -1.023948371 | 6.471121114 | -14.07578988 | 7.65E-39 | 2.05E-37 | 77.25293354 |
| GATA2    | 1.440811879  | 1.961117155 | 14.07200865  | 7.96E-39 | 2.13E-37 | 77.21345053 |
| OLFML1   | 1.314432314  | 1.937753443 | 14.06774025  | 8.32E-39 | 2.22E-37 | 77.16888672 |
| PCDH17   | 1.29025814   | 1.820786939 | 14.06577053  | 8.50E-39 | 2.26E-37 | 77.14832429 |
| ANLN     | -2.145919432 | 2.543506217 | -14.06156882 | 8.88E-39 | 2.36E-37 | 77.10446608 |
| JAML     | 1.476033905  | 1.953681834 | 14.0486127   | 1.02E-38 | 2.70E-37 | 76.96926799 |
| CTNNAL1  | 1.268581887  | 3.673171313 | 14.04242561  | 1.09E-38 | 2.87E-37 | 76.90472648 |
| FKBP11   | -1.471470944 | 3.240343992 | -14.03178357 | 1.21E-38 | 3.21E-37 | 76.79374491 |
| RBMS3    | 1.206961577  | 1.400687214 | 14.03118284  | 1.22E-38 | 3.23E-37 | 76.78748137 |
| GPC3     | 2.607174134  | 3.20060258  | 14.02849394  | 1.26E-38 | 3.31E-37 | 76.75944697 |
| SORBS1   | 1.235351359  | 1.725507923 | 14.01957063  | 1.38E-38 | 3.63E-37 | 76.6664314  |
| PLA2G1B  | 2.932088632  | 2.120062865 | 14.01288414  | 1.48E-38 | 3.89E-37 | 76.59675113 |
| UQC2     | -1.22085423  | 3.135028136 | -14.01197938 | 1.49E-38 | 3.92E-37 | 76.58732387 |
| KIF11    | -1.648839059 | 2.326048014 | -14.0111878  | 1.51E-38 | 3.95E-37 | 76.57907603 |
| CSF3     | 2.172106149  | 0.937463759 | 14.00880666  | 1.54E-38 | 4.04E-37 | 76.55426746 |
| PLEKHN1  | -1.398382554 | 1.625247276 | -14.00074261 | 1.68E-38 | 4.39E-37 | 76.47026498 |
| PSAT1    | -2.335690669 | 3.121460378 | -13.99601296 | 1.77E-38 | 4.61E-37 | 76.42100755 |
| NEK2     | -1.880641563 | 2.124154084 | -13.98303369 | 2.02E-38 | 5.27E-37 | 76.28587559 |
| SLC52A2  | -1.355204895 | 4.662105756 | -13.97767595 | 2.14E-38 | 5.56E-37 | 76.23011196 |
| DUS1L    | -1.141619962 | 4.117767227 | -13.97566977 | 2.19E-38 | 5.67E-37 | 76.20923422 |
| OGN      | 1.885360225  | 1.291683049 | 13.94711834  | 2.95E-38 | 7.63E-37 | 75.91226709 |
| FABP5    | 1.894562261  | 2.886041794 | 13.9406532   | 3.15E-38 | 8.16E-37 | 75.84506372 |
| MRM1     | -1.005194643 | 2.427160336 | -13.93529405 | 3.33E-38 | 8.62E-37 | 75.78936828 |
| CFL2     | 1.178299559  | 2.329966784 | 13.91446616  | 4.14E-38 | 1.07E-36 | 75.57301286 |
| CRABP2   | -4.176198048 | 5.664933194 | -13.91191048 | 4.26E-38 | 1.10E-36 | 75.54647602 |
| AHNAK    | 2.077118468  | 4.972260574 | 13.91138662  | 4.28E-38 | 1.10E-36 | 75.54103689 |
| EFNA3    | -1.429257176 | 1.725867415 | -13.91052842 | 4.32E-38 | 1.11E-36 | 75.5321265  |
| TMEM150B | 1.372000658  | 1.53441934  | 13.90808831  | 4.43E-38 | 1.13E-36 | 75.50679304 |
| DUOXA1   | 2.047152674  | 2.070649623 | 13.89802638  | 4.92E-38 | 1.25E-36 | 75.40235268 |
| FERMT1   | -1.803100273 | 2.282513179 | -13.89418434 | 5.12E-38 | 1.30E-36 | 75.36248312 |
| UHRF1    | -1.506256919 | 1.707131517 | -13.88425585 | 5.68E-38 | 1.44E-36 | 75.25947843 |
| SRPX     | 1.749924583  | 2.263775437 | 13.88161763  | 5.84E-38 | 1.48E-36 | 75.23211393 |
| LDHA     | -1.316126874 | 6.845356035 | -13.86749601 | 6.76E-38 | 1.71E-36 | 75.08568332 |
| CACNA2D2 | 3.020610775  | 2.839214813 | 13.86234107  | 7.14E-38 | 1.80E-36 | 75.03224885 |
| ARHGAP44 | 1.376464671  | 1.808911845 | 13.85773241  | 7.49E-38 | 1.89E-36 | 74.98448524 |
| SHMT2    | -1.33900769  | 4.334893235 | -13.85471281 | 7.73E-38 | 1.95E-36 | 74.95319475 |
| NEBL     | 1.527497333  | 2.440518692 | 13.83622992  | 9.37E-38 | 2.36E-36 | 74.76174025 |
| CHPF2    | -1.00778075  | 4.584396038 | -13.83353669 | 9.64E-38 | 2.42E-36 | 74.73385312 |
| TMPRSS4  | -2.669659908 | 2.859660994 | -13.82965109 | 1.00E-37 | 2.52E-36 | 74.69362419 |
| FZD4     | 1.386834607  | 2.371445419 | 13.82146487  | 1.09E-37 | 2.73E-36 | 74.60888806 |



|           |              |             |              |          |          |             |
|-----------|--------------|-------------|--------------|----------|----------|-------------|
| TINCR     | 1.314912192  | 0.732421969 | 13.80194273  | 1.34E-37 | 3.34E-36 | 74.40691376 |
| RBP4      | 2.359920403  | 1.948014518 | 13.79256137  | 1.48E-37 | 3.68E-36 | 74.30990558 |
| KPNA2     | -1.761206956 | 4.749148221 | -13.79141084 | 1.49E-37 | 3.71E-36 | 74.29801082 |
| PRC1      | -1.628043564 | 2.448562213 | -13.78951754 | 1.52E-37 | 3.78E-36 | 74.27843797 |
| SHROOM4   | 1.389953483  | 1.752102441 | 13.78734738  | 1.56E-37 | 3.87E-36 | 74.25600455 |
| ITPRID2   | 1.106691229  | 3.73444121  | 13.78057708  | 1.67E-37 | 4.14E-36 | 74.18602979 |
| KIF26B    | -1.51683174  | 1.789736182 | -13.77938114 | 1.69E-37 | 4.18E-36 | 74.17367088 |
| MS4A15    | 3.320694898  | 2.127069237 | 13.77599891  | 1.75E-37 | 4.32E-36 | 74.13872161 |
| RUSC1     | -1.022575009 | 3.354536377 | -13.75937638 | 2.08E-37 | 5.12E-36 | 73.96702016 |
| CBX4      | -1.038765367 | 3.894262487 | -13.75691209 | 2.14E-37 | 5.24E-36 | 73.94157426 |
| MT1M      | 2.193846868  | 1.840125523 | 13.75416701  | 2.20E-37 | 5.38E-36 | 73.91323163 |
| DPYSL2    | 1.619770821  | 4.497087627 | 13.74283937  | 2.47E-37 | 6.05E-36 | 73.79630512 |
| CDC6      | -1.709984082 | 1.996010334 | -13.72840587 | 2.87E-37 | 7.01E-36 | 73.6473892  |
| KIF4A     | -1.809503509 | 1.987226507 | -13.72615954 | 2.94E-37 | 7.16E-36 | 73.6242201  |
| CALCOCO1  | 1.07646623   | 3.304931169 | 13.72607627  | 2.94E-37 | 7.16E-36 | 73.62336127 |
| KLF13     | 1.243048819  | 3.508334466 | 13.71119879  | 3.44E-37 | 8.32E-36 | 73.46996    |
| AURKB     | -1.965054492 | 2.350576872 | -13.70090434 | 3.82E-37 | 9.25E-36 | 73.36386338 |
| PDCD2L    | -1.140014565 | 2.633428909 | -13.69428369 | 4.09E-37 | 9.88E-36 | 73.29565085 |
| KIAA0040  | 1.079443731  | 3.519490428 | 13.67872754  | 4.81E-37 | 1.16E-35 | 73.13544126 |
| PPIF      | -1.091712856 | 4.456513009 | -13.67546107 | 4.98E-37 | 1.20E-35 | 73.10181229 |
| DONSON    | -1.066241143 | 2.273682847 | -13.6752539  | 4.99E-37 | 1.20E-35 | 73.09967953 |
| TLCD1     | -1.513241145 | 3.839643056 | -13.67145412 | 5.19E-37 | 1.24E-35 | 73.06056539 |
| GINS1     | -1.559756638 | 1.928174622 | -13.66597233 | 5.49E-37 | 1.32E-35 | 73.00414668 |
| TIMP3     | 1.548156816  | 1.748433404 | 13.66465367  | 5.56E-37 | 1.33E-35 | 72.99057674 |
| ALG3      | -1.058723928 | 3.959848052 | -13.63358802 | 7.67E-37 | 1.83E-35 | 72.67108045 |
| CYBRD1    | 1.962917627  | 4.61430125  | 13.62040037  | 8.79E-37 | 2.09E-35 | 72.53556295 |
| MVB12B    | 1.210598385  | 2.09512306  | 13.59613328  | 1.13E-36 | 2.67E-35 | 72.28636643 |
| SECISBP2L | 1.360735812  | 3.246812666 | 13.59163992  | 1.18E-36 | 2.80E-35 | 72.24024943 |
| UBASH3B   | 1.137714935  | 1.364198793 | 13.59140983  | 1.19E-36 | 2.80E-35 | 72.23788814 |
| ZFYVE9    | 1.048929719  | 2.17852087  | 13.58032039  | 1.33E-36 | 3.13E-35 | 72.12410722 |
| ACSS3     | 1.007686875  | 0.842289992 | 13.58016627  | 1.33E-36 | 3.13E-35 | 72.12252622 |
| TPPP3     | 2.672196151  | 3.644341396 | 13.57989123  | 1.34E-36 | 3.14E-35 | 72.11970489 |
| AGTR1     | 1.075154112  | 0.670660915 | 13.57760006  | 1.37E-36 | 3.21E-35 | 72.09620309 |
| RTN1      | 1.062070295  | 1.106803449 | 13.57688852  | 1.38E-36 | 3.23E-35 | 72.08890486 |
| KHDC4     | -1.267175415 | 3.256035901 | -13.57551216 | 1.40E-36 | 3.27E-35 | 72.07478818 |
| CLEC12A   | 1.363131902  | 1.249630176 | 13.5745556   | 1.41E-36 | 3.30E-35 | 72.06497755 |
| CCDC167   | -1.352477978 | 4.546210695 | -13.57226019 | 1.45E-36 | 3.37E-35 | 72.04143698 |
| PHLDA2    | -2.174197991 | 4.450133337 | -13.5592875  | 1.65E-36 | 3.84E-35 | 71.90843399 |
| IGSF9     | -1.730101257 | 2.025805574 | -13.55788405 | 1.68E-36 | 3.89E-35 | 71.89404897 |
| DLGAP5    | -1.794446342 | 2.018078721 | -13.55761679 | 1.68E-36 | 3.90E-35 | 71.8913097  |
| ICAM2     | 1.128202053  | 2.21854454  | 13.55038382  | 1.81E-36 | 4.19E-35 | 71.81718642 |
| LMOD1     | 1.598280694  | 2.37494363  | 13.54764238  | 1.86E-36 | 4.30E-35 | 71.78909744 |
| FGFR2     | 1.701149838  | 2.022558955 | 13.54570578  | 1.90E-36 | 4.38E-35 | 71.76925673 |
| CCDC69    | 1.512458588  | 3.338945301 | 13.54382662  | 1.94E-36 | 4.46E-35 | 71.75000583 |
| CCNA2     | -1.838006379 | 2.582152582 | -13.53737273 | 2.07E-36 | 4.75E-35 | 71.68389993 |
| A2M       | 2.045268772  | 7.292606046 | 13.5328593   | 2.17E-36 | 4.97E-35 | 71.63767946 |
| PTGER4    | 1.42454661   | 2.189794187 | 13.52697218  | 2.31E-36 | 5.27E-35 | 71.5774033  |
| ENO1      | -1.23051055  | 8.709841981 | -13.51389548 | 2.64E-36 | 6.01E-35 | 71.44356383 |
| FOXM1     | -1.993044338 | 2.503246977 | -13.49321389 | 3.26E-36 | 7.41E-35 | 71.23202453 |
| LPL       | 2.700382218  | 3.203424145 | 13.49098463  | 3.34E-36 | 7.58E-35 | 71.20923278 |
| BUB1B     | -1.564056144 | 1.783550194 | -13.47622774 | 3.89E-36 | 8.80E-35 | 71.05840857 |
| CYP4B1    | 3.73946263   | 3.876006151 | 13.47550623  | 3.92E-36 | 8.85E-35 | 71.0510365  |
| ZEB2      | 1.105475657  | 1.651266729 | 13.46964267  | 4.16E-36 | 9.39E-35 | 70.9911327  |
| TLR8      | 1.36605529   | 1.427672939 | 13.46755283  | 4.25E-36 | 9.58E-35 | 70.96978553 |
| PKP3      | -1.421197548 | 4.269715899 | -13.46049421 | 4.57E-36 | 1.03E-34 | 70.89769632 |
| ACP5      | 1.735092978  | 5.300810071 | 13.44736196  | 5.23E-36 | 1.17E-34 | 70.76362955 |

|          |              |             |              |          |          |             |
|----------|--------------|-------------|--------------|----------|----------|-------------|
| SLC11A1  | 1.536655238  | 2.220955455 | 13.42807502  | 6.37E-36 | 1.43E-34 | 70.56685263 |
| HYAL1    | 2.168754204  | 2.482033895 | 13.42295404  | 6.72E-36 | 1.50E-34 | 70.51462993 |
| PRKCQ    | 1.14195271   | 1.333027392 | 13.40105842  | 8.41E-36 | 1.88E-34 | 70.29145975 |
| SCARA5   | 1.736979409  | 1.012408179 | 13.39804339  | 8.67E-36 | 1.93E-34 | 70.26074395 |
| STX1A    | -1.647151785 | 2.117127263 | -13.39528823 | 8.92E-36 | 1.99E-34 | 70.23267876 |
| MND1     | -1.205322021 | 1.429450812 | -13.38722493 | 9.69E-36 | 2.16E-34 | 70.15056014 |
| CD300LF  | 1.612530313  | 2.317478861 | 13.37563215  | 1.09E-35 | 2.42E-34 | 70.03254146 |
| RASL12   | 1.332113876  | 2.437169868 | 13.369339    | 1.16E-35 | 2.58E-34 | 69.96849726 |
| SLC46A2  | 1.952937336  | 1.40580267  | 13.36769285  | 1.18E-35 | 2.62E-34 | 69.95174731 |
| ARHGEF6  | 1.2606138    | 2.322553449 | 13.36450325  | 1.22E-35 | 2.70E-34 | 69.9192954  |
| PLSCR4   | 1.290760553  | 2.707600656 | 13.3601956   | 1.28E-35 | 2.82E-34 | 69.87547458 |
| MELK     | -1.849842594 | 2.128215752 | -13.3499621  | 1.42E-35 | 3.12E-34 | 69.771401   |
| MS4A2    | 1.246870912  | 1.013423103 | 13.34123051  | 1.55E-35 | 3.40E-34 | 69.6826347  |
| TLR4     | 1.44127509   | 2.186188625 | 13.33237029  | 1.70E-35 | 3.72E-34 | 69.59259178 |
| LHFPL3   | 1.119304078  | 0.547421345 | 13.32272116  | 1.87E-35 | 4.09E-34 | 69.49456724 |
| 02-Mar   | 1.3972209    | 2.897811318 | 13.32074805  | 1.91E-35 | 4.17E-34 | 69.47452713 |
| CCRL2    | 1.268858554  | 1.812154741 | 13.31068886  | 2.12E-35 | 4.60E-34 | 69.37238435 |
| ECT2     | -1.588293933 | 3.02988804  | -13.30720101 | 2.20E-35 | 4.76E-34 | 69.33697757 |
| CDT1     | -1.634766129 | 2.219203698 | -13.30543416 | 2.24E-35 | 4.84E-34 | 69.31904326 |
| PROM2    | -1.983477664 | 3.461403642 | -13.300763   | 2.35E-35 | 5.08E-34 | 69.27163514 |
| HJURP    | -1.763741643 | 1.918010589 | -13.29630659 | 2.46E-35 | 5.31E-34 | 69.22641461 |
| LMNB1    | -1.55514753  | 3.450758534 | -13.29326546 | 2.53E-35 | 5.47E-34 | 69.19556    |
| LIMCH1   | 1.646699518  | 3.829083464 | 13.29001318  | 2.62E-35 | 5.65E-34 | 69.16256716 |
| TIMELESS | -1.326344405 | 2.931722256 | -13.28264435 | 2.82E-35 | 6.07E-34 | 69.08782969 |
| HDGF     | -1.038805326 | 6.61653596  | -13.27521684 | 3.04E-35 | 6.54E-34 | 69.01251908 |
| CENPF    | -1.738607626 | 2.038939436 | -13.25872888 | 3.60E-35 | 7.73E-34 | 68.84542026 |
| CCNF     | -1.130693126 | 1.853549067 | -13.25790943 | 3.63E-35 | 7.78E-34 | 68.83711831 |
| FEN1     | -1.357283751 | 3.606058942 | -13.25537872 | 3.73E-35 | 7.98E-34 | 68.81148106 |
| P3H2     | 2.216128017  | 2.383876576 | 13.24765214  | 4.03E-35 | 8.61E-34 | 68.73322352 |
| RHBDL2   | -1.442338849 | 1.945767801 | -13.24138221 | 4.30E-35 | 9.17E-34 | 68.66973718 |
| CHAF1B   | -1.064287026 | 1.684728009 | -13.23638768 | 4.52E-35 | 9.64E-34 | 68.61917622 |
| ZEB1     | 1.083826376  | 1.892094799 | 13.22915773  | 4.87E-35 | 1.03E-33 | 68.54600352 |
| CDCA5    | -1.777106114 | 2.34128255  | -13.22836889 | 4.91E-35 | 1.04E-33 | 68.53802105 |
| NEXN     | 1.21944225   | 1.891943566 | 13.20828062  | 6.02E-35 | 1.27E-33 | 68.33482981 |
| BOP1     | -1.448250541 | 3.856746031 | -13.2065797  | 6.13E-35 | 1.29E-33 | 68.31763261 |
| PTTG1    | -1.767604292 | 3.258192361 | -13.20023441 | 6.53E-35 | 1.38E-33 | 68.25348892 |
| ALOX5    | 1.821209458  | 3.793817786 | 13.19986752  | 6.56E-35 | 1.38E-33 | 68.2497806  |
| PRDX4    | -1.368071092 | 5.777726995 | -13.19813616 | 6.68E-35 | 1.41E-33 | 68.23228158 |
| BYSL     | -1.127493841 | 3.490243002 | -13.1941879  | 6.95E-35 | 1.46E-33 | 68.19238081 |
| MKI67    | -1.827632535 | 2.347469374 | -13.19389791 | 6.97E-35 | 1.46E-33 | 68.18945045 |
| COL1A1   | -2.814205891 | 7.348223859 | -13.19278292 | 7.05E-35 | 1.48E-33 | 68.17818371 |
| GPR4     | 1.046613401  | 1.717104799 | 13.18817014  | 7.39E-35 | 1.55E-33 | 68.131578   |
| CENPU    | -1.515957987 | 2.340569495 | -13.18269645 | 7.81E-35 | 1.64E-33 | 68.07628529 |
| KIF22    | -1.055528079 | 3.510651776 | -13.17893177 | 8.11E-35 | 1.69E-33 | 68.03826325 |
| NME4     | -1.303099158 | 4.451007694 | -13.17169513 | 8.73E-35 | 1.82E-33 | 67.96519189 |
| VAMP2    | 1.049488598  | 4.288635137 | 13.15471469  | 1.04E-34 | 2.16E-33 | 67.79381728 |
| IL7R     | 1.980480046  | 3.219076041 | 13.14574021  | 1.14E-34 | 2.36E-33 | 67.70329021 |
| NTN4     | 1.711709137  | 3.688539794 | 13.12105759  | 1.46E-34 | 3.01E-33 | 67.45448296 |
| LRRK2    | 2.504548577  | 2.607652591 | 13.11520698  | 1.55E-34 | 3.19E-33 | 67.39554399 |
| TMEM139  | 1.811299702  | 1.56036316  | 13.11484129  | 1.56E-34 | 3.20E-33 | 67.3918605  |
| KIFC1    | -1.805922615 | 2.652037625 | -13.10645724 | 1.69E-34 | 3.47E-33 | 67.3074255  |
| METTL1   | -1.153662456 | 3.176911129 | -13.09616844 | 1.88E-34 | 3.84E-33 | 67.20384753 |
| C1orf198 | 1.124396407  | 4.567383553 | 13.08516854  | 2.10E-34 | 4.28E-33 | 67.09315917 |
| ACKR1    | 2.24004857   | 2.564964115 | 13.06336468  | 2.62E-34 | 5.32E-33 | 66.87390196 |
| PCYOX1   | 1.026717777  | 4.554996053 | 13.05347336  | 2.89E-34 | 5.86E-33 | 66.77450089 |
| ID4      | 1.99860811   | 2.868806296 | 13.04481528  | 3.16E-34 | 6.38E-33 | 66.68752635 |

|          |              |             |              |          |          |             |
|----------|--------------|-------------|--------------|----------|----------|-------------|
| DTYMK    | -1.16120953  | 3.623025788 | -13.03510087 | 3.49E-34 | 7.02E-33 | 66.58997757 |
| HS6ST2   | -2.235884343 | 2.67691342  | -13.02647019 | 3.80E-34 | 7.65E-33 | 66.50334425 |
| AURKA    | -1.755190213 | 2.728231659 | -13.01727389 | 4.17E-34 | 8.38E-33 | 66.41106738 |
| STIL     | -1.037481938 | 1.306853939 | -12.99855527 | 5.04E-34 | 1.01E-32 | 66.22335141 |
| HMMR     | -1.537192189 | 1.898939511 | -12.99757419 | 5.09E-34 | 1.02E-32 | 66.21351682 |
| PCDHGC3  | 1.25744965   | 1.899418081 | 12.99739698  | 5.10E-34 | 1.02E-32 | 66.21174048 |
| PROS1    | 1.568082264  | 3.411409864 | 12.99564671  | 5.19E-34 | 1.04E-32 | 66.19419657 |
| ALOX5AP  | 2.041124469  | 4.47199094  | 12.99549429  | 5.20E-34 | 1.04E-32 | 66.19266886 |
| TONSL    | -1.217860808 | 1.868974794 | -12.99149916 | 5.41E-34 | 1.08E-32 | 66.15262859 |
| NUF2     | -1.659237482 | 1.838643292 | -12.98128046 | 6.00E-34 | 1.19E-32 | 66.05024436 |
| KCNJ5    | 1.314359887  | 1.159121927 | 12.97942911  | 6.11E-34 | 1.21E-32 | 66.03169974 |
| TXNDC17  | -1.429674873 | 4.099064978 | -12.96970046 | 6.74E-34 | 1.33E-32 | 65.93427374 |
| FAM49A   | 1.197625259  | 2.092232767 | 12.96227345  | 7.27E-34 | 1.43E-32 | 65.85992381 |
| HMBS     | -1.005994225 | 2.848620335 | -12.95914906 | 7.50E-34 | 1.48E-32 | 65.82865331 |
| GARS     | -1.01999241  | 4.909610076 | -12.95538019 | 7.79E-34 | 1.53E-32 | 65.79093792 |
| ORC6     | -1.123435639 | 1.280577914 | -12.9441565  | 8.72E-34 | 1.71E-32 | 65.678657   |
| KLF2     | 1.727366289  | 3.613671619 | 12.93374549  | 9.68E-34 | 1.90E-32 | 65.57455344 |
| GIMAP4   | 1.47036403   | 3.878076295 | 12.9208265   | 1.10E-33 | 2.16E-32 | 65.44543523 |
| HLA-E    | 1.32176116   | 8.242592023 | 12.91914199  | 1.12E-33 | 2.19E-32 | 65.42860469 |
| PC       | -1.308458502 | 2.686913222 | -12.91829763 | 1.13E-33 | 2.21E-32 | 65.4201689  |
| UBL3     | 1.061716084  | 4.156606681 | 12.91512308  | 1.17E-33 | 2.28E-32 | 65.38845513 |
| AP1S1    | -1.108762749 | 5.121636468 | -12.90832696 | 1.25E-33 | 2.43E-32 | 65.32057641 |
| EPB41L2  | 1.22988644   | 2.409765057 | 12.90473922  | 1.30E-33 | 2.52E-32 | 65.28475044 |
| GIPC2    | 1.080096489  | 0.794986136 | 12.90050676  | 1.35E-33 | 2.62E-32 | 65.24249347 |
| NCAPH    | -1.60250704  | 2.012443601 | -12.89599736 | 1.42E-33 | 2.74E-32 | 65.19747987 |
| AARD     | 1.299658817  | 0.77615742  | 12.88593525  | 1.57E-33 | 3.02E-32 | 65.09706927 |
| PTPRM    | 1.320714264  | 2.651238811 | 12.88217224  | 1.63E-33 | 3.14E-32 | 65.05952899 |
| NCF2     | 1.660812494  | 3.902936593 | 12.87822956  | 1.69E-33 | 3.26E-32 | 65.02020271 |
| E2F8     | -1.177170846 | 1.320440886 | -12.87433176 | 1.76E-33 | 3.38E-32 | 64.98133057 |
| GINS2    | -1.469317934 | 1.878885971 | -12.87355863 | 1.77E-33 | 3.40E-32 | 64.97362105 |
| MYOZ1    | 1.302787736  | 1.123364993 | 12.8697637   | 1.84E-33 | 3.53E-32 | 64.93578227 |
| INAVA    | -1.583315826 | 2.826698061 | -12.8586925  | 2.06E-33 | 3.94E-32 | 64.82542777 |
| LAD1     | -1.777814278 | 5.165926018 | -12.85374883 | 2.16E-33 | 4.13E-32 | 64.77616748 |
| FANCI    | -1.230432935 | 2.074756163 | -12.84926785 | 2.26E-33 | 4.32E-32 | 64.73152664 |
| GFPT1    | -1.057279059 | 4.309663873 | -12.8474175  | 2.30E-33 | 4.40E-32 | 64.7130955  |
| SCIMP    | 1.18630622   | 1.569440289 | 12.84298265  | 2.41E-33 | 4.59E-32 | 64.6689261  |
| CA3      | 1.383325171  | 1.121944589 | 12.82988053  | 2.75E-33 | 5.21E-32 | 64.53848334 |
| GPI      | -1.093442915 | 5.203407151 | -12.82781697 | 2.80E-33 | 5.32E-32 | 64.51794552 |
| VMP1     | -1.240377013 | 5.101301117 | -12.82771938 | 2.81E-33 | 5.32E-32 | 64.51697433 |
| TIMP1    | -1.602943692 | 7.957053244 | -12.82757752 | 2.81E-33 | 5.32E-32 | 64.51556243 |
| C1QTNF6  | -1.389952093 | 2.139467756 | -12.81572751 | 3.17E-33 | 5.97E-32 | 64.39766047 |
| FAM167A  | 1.718334967  | 1.688000146 | 12.80030456  | 3.69E-33 | 6.96E-32 | 64.24429946 |
| XPR1     | -1.532774038 | 3.932491637 | -12.79874619 | 3.75E-33 | 7.06E-32 | 64.22880916 |
| SLC25A25 | 1.146468581  | 2.583654498 | 12.79584832  | 3.86E-33 | 7.25E-32 | 64.20000697 |
| DECR2    | -1.059517848 | 2.565189604 | -12.79347729 | 3.96E-33 | 7.42E-32 | 64.17644379 |
| UTRN     | 1.298593314  | 3.107357494 | 12.78896568  | 4.14E-33 | 7.76E-32 | 64.13161427 |
| ST14     | -1.425924751 | 5.923263549 | -12.78323409 | 4.38E-33 | 8.20E-32 | 64.07467516 |
| GALNT18  | 1.341271781  | 3.151188204 | 12.77347347  | 4.83E-33 | 9.00E-32 | 63.97774299 |
| SOCS2    | 1.59596268   | 1.987661699 | 12.77101329  | 4.95E-33 | 9.22E-32 | 63.9533176  |
| CDC45    | -1.558117111 | 1.867539691 | -12.76641819 | 5.18E-33 | 9.64E-32 | 63.90770306 |
| SPC24    | -1.3304746   | 1.72623708  | -12.76196368 | 5.42E-33 | 1.01E-31 | 63.8634928  |
| GTSE1    | -1.349053375 | 1.562792118 | -12.73359493 | 7.19E-33 | 1.33E-31 | 63.5821389  |
| NRN1     | 1.621188187  | 1.979198572 | 12.72387809  | 7.93E-33 | 1.46E-31 | 63.48584982 |
| TDRKH    | -1.081565019 | 2.698427231 | -12.7021514  | 9.84E-33 | 1.81E-31 | 63.27069754 |
| PKMYT1   | -1.281425719 | 1.498475355 | -12.70140181 | 9.92E-33 | 1.83E-31 | 63.26327825 |
| NPR3     | 1.340735561  | 1.559251903 | 12.69460431  | 1.06E-32 | 1.95E-31 | 63.19600918 |

|          |              |             |              |          |          |             |
|----------|--------------|-------------|--------------|----------|----------|-------------|
| MEX3A    | -1.878242599 | 2.018237411 | -12.68352731 | 1.19E-32 | 2.17E-31 | 63.08643272 |
| CDCA7    | -1.83372175  | 2.436078291 | -12.67316806 | 1.31E-32 | 2.40E-31 | 62.98400479 |
| HOXA5    | 1.269677303  | 2.015672834 | 12.67178569  | 1.33E-32 | 2.43E-31 | 62.97034002 |
| KHDRBS2  | 1.287513481  | 0.869755351 | 12.66221913  | 1.46E-32 | 2.67E-31 | 62.87579727 |
| C19orf48 | -1.25740923  | 3.644299944 | -12.66107855 | 1.48E-32 | 2.70E-31 | 62.86452805 |
| GMFG     | 1.431557962  | 3.955299176 | 12.65957263  | 1.50E-32 | 2.74E-31 | 62.84964997 |
| THBS2    | -2.326970529 | 4.299536842 | -12.65252038 | 1.61E-32 | 2.93E-31 | 62.77998904 |
| TBX5     | 1.09058203   | 1.581334158 | 12.64947597  | 1.66E-32 | 3.02E-31 | 62.74992358 |
| RALGPS2  | -1.083193726 | 2.07000046  | -12.64240635 | 1.78E-32 | 3.23E-31 | 62.68012234 |
| UNC5CL   | -1.727883677 | 2.19510103  | -12.63899845 | 1.85E-32 | 3.33E-31 | 62.64648258 |
| LMO7     | 1.409055064  | 4.093411034 | 12.62765688  | 2.07E-32 | 3.72E-31 | 62.53456545 |
| MOCS1    | 1.041671835  | 1.828097793 | 12.62094936  | 2.21E-32 | 3.97E-31 | 62.46840307 |
| NPNT     | 2.113697426  | 3.492809013 | 12.61633436  | 2.31E-32 | 4.15E-31 | 62.42289266 |
| GNG11    | 1.797889181  | 3.473692213 | 12.6023486   | 2.66E-32 | 4.75E-31 | 62.28503038 |
| ZBTB16   | 1.355983483  | 0.827121607 | 12.60040592  | 2.71E-32 | 4.84E-31 | 62.26588762 |
| TYMS     | -1.459895265 | 3.071635683 | -12.59736396 | 2.79E-32 | 4.98E-31 | 62.235916   |
| TNS2     | 1.316186246  | 3.411863439 | 12.59173291  | 2.95E-32 | 5.26E-31 | 62.18044565 |
| COLEC12  | 1.769190794  | 2.655177509 | 12.58428237  | 3.18E-32 | 5.65E-31 | 62.10707334 |
| FCGR3B   | 1.21580136   | 0.843378335 | 12.57502835  | 3.48E-32 | 6.18E-31 | 62.01597463 |
| SKA3     | -1.279067134 | 1.455610346 | -12.56680466 | 3.78E-32 | 6.69E-31 | 61.93505056 |
| MMP11    | -2.831142225 | 2.953316459 | -12.56170919 | 3.97E-32 | 7.02E-31 | 61.88492433 |
| LIFR     | 1.555754455  | 2.647071987 | 12.54528571  | 4.67E-32 | 8.23E-31 | 61.72343808 |
| HGH1     | -1.051715385 | 3.615082775 | -12.54185471 | 4.83E-32 | 8.50E-31 | 61.68971739 |
| ITLN1    | 2.072443363  | 0.765641995 | 12.53753831  | 5.05E-32 | 8.87E-31 | 61.64730223 |
| TOX2     | 1.220737945  | 1.67139189  | 12.53426727  | 5.21E-32 | 9.15E-31 | 61.61516477 |
| DCSTAMP  | 1.026185172  | 0.758375415 | 12.52266305  | 5.85E-32 | 1.02E-30 | 61.50119375 |
| EFEMP1   | 1.846410287  | 4.708886158 | 12.51886794  | 6.07E-32 | 1.06E-30 | 61.46393296 |
| TSTA3    | -1.264292942 | 4.775702477 | -12.5111882  | 6.55E-32 | 1.14E-30 | 61.38855226 |
| NIPSNAP1 | -1.047024471 | 4.625031357 | -12.49098969 | 7.99E-32 | 1.38E-30 | 61.19041867 |
| SLC7A7   | 1.349609968  | 2.998677805 | 12.48509238  | 8.47E-32 | 1.46E-30 | 61.1326045  |
| TMED3    | -1.000676299 | 2.906892748 | -12.48334147 | 8.62E-32 | 1.49E-30 | 61.11544253 |
| TPI1     | -1.115182652 | 7.494514251 | -12.47614013 | 9.25E-32 | 1.59E-30 | 61.04487102 |
| RRAS     | 1.318503742  | 5.398960511 | 12.47105201  | 9.73E-32 | 1.67E-30 | 60.99502264 |
| BRIX1    | -1.029344122 | 3.133926346 | -12.47041972 | 9.79E-32 | 1.68E-30 | 60.98882888 |
| FOSB     | 3.261142763  | 3.20427074  | 12.46316957  | 1.05E-31 | 1.80E-30 | 60.91782123 |
| MCM2     | -1.53836371  | 3.242915579 | -12.45767627 | 1.11E-31 | 1.90E-30 | 60.86403576 |
| SLC7A5   | -2.121804387 | 4.184366901 | -12.45591013 | 1.13E-31 | 1.93E-30 | 60.84674617 |
| PILRA    | 1.386033728  | 2.691759841 | 12.45107966  | 1.18E-31 | 2.02E-30 | 60.79946558 |
| NEDD9    | 1.686818294  | 3.779293176 | 12.44762327  | 1.23E-31 | 2.09E-30 | 60.76564087 |
| TSPAN7   | 2.240167498  | 2.731395175 | 12.43994785  | 1.32E-31 | 2.24E-30 | 60.69054739 |
| SEMA4B   | -1.464103051 | 4.57772259  | -12.4205836  | 1.60E-31 | 2.71E-30 | 60.50121274 |
| PAPSS2   | 1.581285135  | 4.343880668 | 12.4194949   | 1.62E-31 | 2.73E-30 | 60.49057301 |
| SRM      | -1.056042757 | 4.976011606 | -12.41297092 | 1.72E-31 | 2.91E-30 | 60.42682586 |
| CLIC3    | 2.258924218  | 3.705658972 | 12.39841605  | 1.99E-31 | 3.35E-30 | 60.28467653 |
| HSH2D    | -1.162330456 | 2.742259467 | -12.39514724 | 2.05E-31 | 3.46E-30 | 60.25276499 |
| SH3BP5   | 1.125871912  | 2.00982861  | 12.39296104  | 2.10E-31 | 3.53E-30 | 60.23142513 |
| TNFSF12  | 1.10161237   | 3.923476245 | 12.38333868  | 2.31E-31 | 3.88E-30 | 60.13752534 |
| CCT5     | -1.172547665 | 5.168652155 | -12.38158714 | 2.35E-31 | 3.94E-30 | 60.12043746 |
| TROAP    | -1.622050445 | 1.760014389 | -12.37197325 | 2.58E-31 | 4.32E-30 | 60.02666981 |
| RIPOR1   | 1.090681163  | 3.231267942 | 12.36704029  | 2.71E-31 | 4.53E-30 | 59.97857326 |
| APBB1    | 1.19033574   | 2.348160134 | 12.35582471  | 3.02E-31 | 5.05E-30 | 59.86926208 |
| TACC3    | -1.296212924 | 2.888996729 | -12.35263227 | 3.12E-31 | 5.20E-30 | 59.83815781 |
| GJB2     | -2.54867456  | 2.934205948 | -12.34732896 | 3.29E-31 | 5.47E-30 | 59.78649737 |
| MIS18A   | -1.021171663 | 2.924691888 | -12.34677312 | 3.30E-31 | 5.49E-30 | 59.78108359 |
| ABCC3    | -2.073026026 | 4.200590406 | -12.33992775 | 3.53E-31 | 5.87E-30 | 59.7144224  |
| SSR4     | -1.31522775  | 5.869970185 | -12.3376444  | 3.61E-31 | 5.99E-30 | 59.69219157 |

|          |              |             |              |          |          |             |
|----------|--------------|-------------|--------------|----------|----------|-------------|
| KNTC1    | -1.102618904 | 1.659577967 | -12.33408061 | 3.74E-31 | 6.20E-30 | 59.65749906 |
| FILIP1   | 1.29185711   | 1.376060745 | 12.33175293  | 3.83E-31 | 6.34E-30 | 59.63484291 |
| KRT80    | -1.891943646 | 3.404506961 | -12.32946489 | 3.91E-31 | 6.48E-30 | 59.61257489 |
| CYP27A1  | 1.786207798  | 4.406359044 | 12.32571078  | 4.06E-31 | 6.71E-30 | 59.57604387 |
| NDC80    | -1.456367098 | 1.748938315 | -12.32009348 | 4.29E-31 | 7.07E-30 | 59.52139424 |
| AATK     | 1.508013584  | 1.487764131 | 12.31391007  | 4.56E-31 | 7.51E-30 | 59.46125369 |
| SHANK3   | 1.050068893  | 2.125218652 | 12.30976779  | 4.75E-31 | 7.81E-30 | 59.42097525 |
| DARS2    | -1.027509786 | 3.273326742 | -12.30899969 | 4.78E-31 | 7.86E-30 | 59.41350726 |
| GNPNAT1  | -1.190449865 | 3.258048892 | -12.30741669 | 4.86E-31 | 7.97E-30 | 59.39811724 |
| SELENOP  | 1.816336363  | 4.043921402 | 12.30482408  | 4.98E-31 | 8.16E-30 | 59.37291414 |
| SUSD2    | 3.132964981  | 4.247928564 | 12.30295925  | 5.08E-31 | 8.31E-30 | 59.35478776 |
| APOLD1   | 1.291817033  | 1.937172826 | 12.30222302  | 5.11E-31 | 8.36E-30 | 59.34763196 |
| ARHGAP18 | 1.104294581  | 3.625814626 | 12.29845564  | 5.30E-31 | 8.67E-30 | 59.3110187  |
| TPBG     | -1.267174058 | 2.595429842 | -12.29181909 | 5.66E-31 | 9.23E-30 | 59.24653737 |
| HDHD3    | -1.075613064 | 3.767863567 | -12.28893632 | 5.82E-31 | 9.49E-30 | 59.21853443 |
| CDK1     | -1.678251018 | 2.82869654  | -12.28374202 | 6.12E-31 | 9.97E-30 | 59.168087   |
| ATAD3A   | -1.03953017  | 3.136078131 | -12.2810606  | 6.29E-31 | 1.02E-29 | 59.14204972 |
| COL3A1   | -2.410043904 | 7.503594766 | -12.27621802 | 6.59E-31 | 1.07E-29 | 59.09503546 |
| PLLP     | 1.408321524  | 2.118994089 | 12.27253872  | 6.83E-31 | 1.11E-29 | 59.05932211 |
| CRIM1    | 1.325107824  | 3.649434128 | 12.25635895  | 8.00E-31 | 1.30E-29 | 58.90234607 |
| CKS1B    | -1.379330173 | 3.41880212  | -12.25334378 | 8.24E-31 | 1.33E-29 | 58.87310622 |
| ALDOA    | -1.179803158 | 7.603397459 | -12.24917687 | 8.59E-31 | 1.39E-29 | 58.83270414 |
| FLRT3    | 1.979906628  | 3.033159695 | 12.24366242  | 9.06E-31 | 1.46E-29 | 58.77924883 |
| BCL9     | -1.108911004 | 3.032732099 | -12.2341453  | 9.94E-31 | 1.60E-29 | 58.68702589 |
| HK3      | 1.65126965   | 2.396116636 | 12.2301482   | 1.03E-30 | 1.66E-29 | 58.64830566 |
| SLC15A2  | 1.592744043  | 2.262469957 | 12.22356612  | 1.10E-30 | 1.77E-29 | 58.58456052 |
| TTYH3    | -1.344450044 | 4.477564347 | -12.22017427 | 1.14E-30 | 1.82E-29 | 58.55171949 |
| NOSTRIN  | 1.241050156  | 1.770925136 | 12.21712635  | 1.17E-30 | 1.88E-29 | 58.52221295 |
| MYH10    | 1.410519135  | 3.65453229  | 12.2168932   | 1.18E-30 | 1.88E-29 | 58.51995606 |
| NDRG2    | 1.425031466  | 2.608005536 | 12.21668165  | 1.18E-30 | 1.88E-29 | 58.51790826 |
| CDC25C   | -1.059820197 | 1.102204945 | -12.20622909 | 1.31E-30 | 2.08E-29 | 58.41675343 |
| SLC27A3  | 1.167834637  | 2.868055738 | 12.2003128   | 1.38E-30 | 2.20E-29 | 58.35952096 |
| GPRIN1   | -1.228769077 | 1.550137128 | -12.19609932 | 1.44E-30 | 2.29E-29 | 58.31877084 |
| STK39    | -1.299767332 | 3.74794758  | -12.18874331 | 1.55E-30 | 2.45E-29 | 58.24764786 |
| MCM6     | -1.249421762 | 3.608033649 | -12.18323055 | 1.63E-30 | 2.58E-29 | 58.19436328 |
| TUBG1    | -1.080782654 | 4.123722794 | -12.18301029 | 1.64E-30 | 2.59E-29 | 58.1922346  |
| PPBP     | 1.823351989  | 1.05632082  | 12.16431523  | 1.96E-30 | 3.09E-29 | 58.01164114 |
| JUND     | 1.284171031  | 6.177969534 | 12.16019395  | 2.04E-30 | 3.22E-29 | 57.97185162 |
| GJA5     | 1.500091112  | 3.123854018 | 12.15503664  | 2.15E-30 | 3.38E-29 | 57.92207086 |
| KIF18B   | -1.476335869 | 1.575787377 | -12.15436443 | 2.16E-30 | 3.39E-29 | 57.91558321 |
| BAIAP2L1 | -1.119687989 | 4.147822233 | -12.15207989 | 2.21E-30 | 3.46E-29 | 57.89353646 |
| RFC4     | -1.256407959 | 2.591239014 | -12.12158408 | 2.97E-30 | 4.62E-29 | 57.59947261 |
| STOM     | 1.268415344  | 6.383594817 | 12.11999692  | 3.02E-30 | 4.69E-29 | 57.58417992 |
| EXO1     | -1.30363832  | 1.411798065 | -12.11954157 | 3.03E-30 | 4.71E-29 | 57.57979272 |
| ABCG1    | 1.289811395  | 2.935807823 | 12.11483874  | 3.17E-30 | 4.92E-29 | 57.5344877  |
| ABHD11   | -1.290512071 | 4.289639968 | -12.09889977 | 3.70E-30 | 5.73E-29 | 57.38101588 |
| PPIL1    | -1.014674652 | 4.297585429 | -12.09704644 | 3.77E-30 | 5.83E-29 | 57.36317837 |
| CDCA3    | -1.187344081 | 1.346481661 | -12.09229337 | 3.95E-30 | 6.09E-29 | 57.31743965 |
| BUB1     | -1.445793174 | 1.977197225 | -12.078003   | 4.54E-30 | 6.97E-29 | 57.17998772 |
| APOBR    | 1.395961338  | 2.476581511 | 12.07121876  | 4.84E-30 | 7.43E-29 | 57.11476711 |
| PYCR3    | -1.104718283 | 2.853248992 | -12.06798867 | 5.00E-30 | 7.66E-29 | 57.08372212 |
| FAM167B  | 1.097089495  | 2.499593827 | 12.06449275  | 5.17E-30 | 7.91E-29 | 57.05012778 |
| FAM111B  | -1.34273854  | 1.726316771 | -12.05622181 | 5.60E-30 | 8.56E-29 | 56.97067041 |
| POC1A    | -1.080130265 | 2.208712455 | -12.05546901 | 5.64E-30 | 8.61E-29 | 56.96344    |
| CD83     | 1.446755365  | 3.538049916 | 12.05412472  | 5.72E-30 | 8.72E-29 | 56.95052921 |
| CDKN3    | -1.619178937 | 2.130901035 | -12.04020566 | 6.54E-30 | 9.92E-29 | 56.81689819 |

|            |              |             |              |          |          |             |
|------------|--------------|-------------|--------------|----------|----------|-------------|
| FPR1       | 1.612122251  | 2.541626893 | 12.03848975  | 6.65E-30 | 1.01E-28 | 56.80043082 |
| PFKP       | -1.791559785 | 4.649134371 | -12.03687072 | 6.75E-30 | 1.02E-28 | 56.78489452 |
| CENPA      | -1.52299607  | 1.682668696 | -12.03301677 | 7.01E-30 | 1.06E-28 | 56.74791662 |
| ABCA3      | 2.569829151  | 4.623970229 | 12.01854887  | 8.06E-30 | 1.22E-28 | 56.60916306 |
| PTGES      | -2.125385956 | 3.810539822 | -12.01758066 | 8.14E-30 | 1.23E-28 | 56.59988106 |
| ADCK5      | -1.165997156 | 2.395631328 | -12.017573   | 8.14E-30 | 1.23E-28 | 56.59980758 |
| C17orf53   | -1.15999768  | 1.443982442 | -12.0136042  | 8.46E-30 | 1.27E-28 | 56.56176425 |
| C1orf115   | 1.56715173   | 2.891042234 | 12.00261982  | 9.40E-30 | 1.41E-28 | 56.45651138 |
| NCAPG      | -1.421964719 | 1.665016751 | -11.99691597 | 9.93E-30 | 1.49E-28 | 56.40187942 |
| ARRB1      | 1.216357003  | 3.408830849 | 11.99651965  | 9.97E-30 | 1.49E-28 | 56.39808393 |
| SIX4       | -1.122538177 | 1.698998077 | -11.99262808 | 1.04E-29 | 1.55E-28 | 56.36081981 |
| EDN1       | 1.922866624  | 3.519857579 | 11.99197436  | 1.04E-29 | 1.56E-28 | 56.35456072 |
| EXOSC5     | -1.096703925 | 3.707772439 | -11.98712555 | 1.09E-29 | 1.63E-28 | 56.30814199 |
| SHCBP1     | -1.132123686 | 1.586209289 | -11.98258735 | 1.14E-29 | 1.70E-28 | 56.26470695 |
| GPRIN2     | 1.699401005  | 2.299329078 | 11.98206003  | 1.15E-29 | 1.70E-28 | 56.25966068 |
| MRPL24     | -1.047506802 | 5.081939473 | -11.98109224 | 1.16E-29 | 1.72E-28 | 56.25039945 |
| PRG4       | 1.851974881  | 1.196445676 | 11.96668352  | 1.33E-29 | 1.97E-28 | 56.11256927 |
| H2AFX      | -1.23041665  | 4.583902169 | -11.96032928 | 1.41E-29 | 2.09E-28 | 56.05181777 |
| DOCK11     | 1.177125404  | 2.228017857 | 11.94990695  | 1.56E-29 | 2.30E-28 | 55.95221389 |
| SELPLG     | 1.457100379  | 3.985728816 | 11.93893313  | 1.74E-29 | 2.55E-28 | 55.84739581 |
| ST6GALNAC2 | 1.276782413  | 1.568678113 | 11.9378657   | 1.75E-29 | 2.57E-28 | 55.83720311 |
| GJA4       | 1.204201019  | 2.592214791 | 11.93765293  | 1.76E-29 | 2.58E-28 | 55.83517149 |
| MMP19      | 1.461996406  | 2.222076609 | 11.93719637  | 1.77E-29 | 2.59E-28 | 55.83081219 |
| CD302      | 1.266778266  | 2.238780542 | 11.93504334  | 1.80E-29 | 2.64E-28 | 55.81025568 |
| PGM2L1     | -1.226514028 | 2.303970378 | -11.93083243 | 1.88E-29 | 2.74E-28 | 55.77005775 |
| F10        | 1.103690332  | 1.228278477 | 11.92544718  | 1.98E-29 | 2.89E-28 | 55.71866178 |
| CRY2       | 1.041112114  | 3.130502374 | 11.9146365   | 2.19E-29 | 3.19E-28 | 55.61552836 |
| SMAD9      | 1.172107415  | 1.270285823 | 11.90623471  | 2.38E-29 | 3.45E-28 | 55.53541458 |
| MYRF       | 1.800390424  | 1.929409971 | 11.89119319  | 2.75E-29 | 3.99E-28 | 55.39207358 |
| PHLDB2     | 1.203985495  | 1.637555796 | 11.89014363  | 2.77E-29 | 4.02E-28 | 55.38207567 |
| EGR2       | 1.416696144  | 2.248437114 | 11.88858835  | 2.82E-29 | 4.08E-28 | 55.36726134 |
| RAD54L     | -1.18843612  | 1.320411923 | -11.88392231 | 2.95E-29 | 4.25E-28 | 55.32282343 |
| CARD16     | 1.17139499   | 2.471521414 | 11.87340545  | 3.26E-29 | 4.70E-28 | 55.22270278 |
| PDGFB      | 1.228524964  | 2.817479419 | 11.85682652  | 3.82E-29 | 5.50E-28 | 55.06497975 |
| MYH11      | 1.879791898  | 2.602665902 | 11.83998812  | 4.49E-29 | 6.44E-28 | 54.90492451 |
| SERPINH1   | -1.11595713  | 5.688294496 | -11.80501864 | 6.27E-29 | 8.93E-28 | 54.57296657 |
| EPHA10     | -1.069552072 | 1.115772732 | -11.8046786  | 6.29E-29 | 8.95E-28 | 54.56974156 |
| FIGNL1     | -1.008322816 | 2.001389866 | -11.80373203 | 6.35E-29 | 9.03E-28 | 54.56076442 |
| DEPDC1B    | -1.222942969 | 1.311500208 | -11.8033473  | 6.37E-29 | 9.06E-28 | 54.55711585 |
| SORBS3     | 1.068952452  | 3.670926788 | 11.7964971   | 6.80E-29 | 9.66E-28 | 54.49216368 |
| ZNF692     | -1.291688689 | 2.866888817 | -11.79417742 | 6.95E-29 | 9.86E-28 | 54.47017417 |
| TUBB3      | -1.268897292 | 1.231689265 | -11.79130643 | 7.15E-29 | 1.01E-27 | 54.44296208 |
| LAMC3      | 1.295722425  | 1.671238417 | 11.78902077  | 7.31E-29 | 1.03E-27 | 54.42130083 |
| ZNF385B    | 1.913886801  | 1.549471381 | 11.7881394   | 7.37E-29 | 1.04E-27 | 54.41294871 |
| ESRP1      | -1.058111031 | 4.49998055  | -11.75914418 | 9.71E-29 | 1.36E-27 | 54.13839434 |
| FLVCR2     | 1.038607931  | 2.138805014 | 11.75642711  | 9.97E-29 | 1.40E-27 | 54.11268768 |
| H1FO       | -1.148494306 | 6.923423037 | -11.74346388 | 1.13E-28 | 1.58E-27 | 53.99008992 |
| SCD5       | 1.562667363  | 2.220011642 | 11.74166375  | 1.15E-28 | 1.60E-27 | 53.97307205 |
| BMP2       | 1.796613434  | 2.742695302 | 11.72591327  | 1.33E-28 | 1.85E-27 | 53.8242393  |
| CA2        | 2.064178009  | 3.10085922  | 11.72539359  | 1.34E-28 | 1.86E-27 | 53.81933073 |
| SLC16A11   | 1.172796481  | 1.117767773 | 11.72265505  | 1.38E-28 | 1.91E-27 | 53.7934663  |
| CEACAM21   | 1.053188771  | 1.306629005 | 11.72103665  | 1.40E-28 | 1.94E-27 | 53.77818293 |
| NR4A3      | 1.640010724  | 1.4752533   | 11.72061816  | 1.40E-28 | 1.95E-27 | 53.7742311  |
| SOX18      | 1.184028093  | 2.185028134 | 11.71341007  | 1.50E-28 | 2.08E-27 | 53.7061784  |
| BTK        | 1.150325282  | 2.0134437   | 11.71119894  | 1.53E-28 | 2.12E-27 | 53.68530798 |
| POLE2      | -1.055578384 | 1.444481553 | -11.70749666 | 1.59E-28 | 2.19E-27 | 53.65036821 |

|           |              |             |              |          |          |             |
|-----------|--------------|-------------|--------------|----------|----------|-------------|
| TNFSF13   | 1.119122755  | 3.385809134 | 11.69531478  | 1.78E-28 | 2.45E-27 | 53.53545096 |
| CKAP2L    | -1.180719558 | 1.345415688 | -11.69311842 | 1.82E-28 | 2.50E-27 | 53.51473954 |
| CHEK1     | -1.108103643 | 1.607191142 | -11.68613473 | 1.95E-28 | 2.66E-27 | 53.4488998  |
| YDJC      | -1.106035935 | 3.599661794 | -11.68520021 | 1.96E-28 | 2.69E-27 | 53.44009136 |
| STYK1     | -1.236855316 | 1.663910726 | -11.68399315 | 1.99E-28 | 2.71E-27 | 53.42871461 |
| MAD2L1    | -1.310946446 | 1.819304103 | -11.67934599 | 2.08E-28 | 2.83E-27 | 53.38492114 |
| PBK       | -1.642331842 | 1.942757446 | -11.6748645  | 2.17E-28 | 2.95E-27 | 53.34269906 |
| NES       | 1.522978039  | 3.222977377 | 11.67439176  | 2.18E-28 | 2.96E-27 | 53.33824578 |
| SERPING1  | 1.449896615  | 6.386293067 | 11.66645059  | 2.35E-28 | 3.19E-27 | 53.2634548  |
| KCNN4     | -2.283106218 | 3.375286105 | -11.66563876 | 2.36E-28 | 3.21E-27 | 53.25581061 |
| PPARG     | 1.527071002  | 2.271094674 | 11.64584181  | 2.85E-28 | 3.86E-27 | 53.06950453 |
| PAQR5     | 1.22537324   | 1.583221039 | 11.64454452  | 2.89E-28 | 3.90E-27 | 53.05730269 |
| ZNF217    | -1.127103915 | 3.751829218 | -11.63493753 | 3.16E-28 | 4.26E-27 | 52.96696908 |
| MFSD2A    | 1.744281629  | 3.421945597 | 11.62688768  | 3.41E-28 | 4.59E-27 | 52.89131244 |
| ORC1      | -1.180078596 | 1.464750167 | -11.62299664 | 3.54E-28 | 4.76E-27 | 52.85475406 |
| RAD51     | -1.053948758 | 1.492574508 | -11.61641056 | 3.77E-28 | 5.06E-27 | 52.79289153 |
| ATAD2     | -1.295353388 | 2.668910752 | -11.61446586 | 3.84E-28 | 5.15E-27 | 52.7746292  |
| PDIA6     | -1.032107527 | 6.026500455 | -11.61411651 | 3.85E-28 | 5.16E-27 | 52.77134874 |
| MRPL15    | -1.080792851 | 5.264508499 | -11.61184428 | 3.94E-28 | 5.27E-27 | 52.75001349 |
| ASPM      | -1.217268325 | 1.293785369 | -11.59537121 | 4.60E-28 | 6.15E-27 | 52.5954154  |
| S100A12   | 1.361129252  | 0.948503318 | 11.58463158  | 5.09E-28 | 6.78E-27 | 52.49469811 |
| SPI1      | 1.576120714  | 4.296585455 | 11.57385063  | 5.64E-28 | 7.49E-27 | 52.39365139 |
| CLEC4E    | 1.204046879  | 1.287701963 | 11.57169151  | 5.75E-28 | 7.64E-27 | 52.37342164 |
| IL20RA    | 1.312743087  | 1.460446395 | 11.56518791  | 6.12E-28 | 8.11E-27 | 52.31250043 |
| RAB5IF    | -1.091171083 | 4.328449801 | -11.55289644 | 6.87E-28 | 9.07E-27 | 52.19742059 |
| WNT3      | -1.053112416 | 1.602202024 | -11.54786277 | 7.20E-28 | 9.50E-27 | 52.15031436 |
| CKAP4     | -1.047449919 | 5.254567413 | -11.54590892 | 7.34E-28 | 9.67E-27 | 52.13203322 |
| RAB11FIP1 | 1.425877367  | 3.648195366 | 11.53398216  | 8.21E-28 | 1.08E-26 | 52.0204825  |
| RFLNB     | 1.061133332  | 2.578517855 | 11.52646126  | 8.81E-28 | 1.16E-26 | 51.95017643 |
| LRRC20    | -1.016874105 | 3.090795289 | -11.52303742 | 9.10E-28 | 1.19E-26 | 51.91817951 |
| GMNN      | -1.078307774 | 2.880763407 | -11.51262462 | 1.00E-27 | 1.31E-26 | 51.82090481 |
| ABLIM3    | 1.24875038   | 1.747136709 | 11.51089212  | 1.02E-27 | 1.33E-26 | 51.80472545 |
| MAOB      | 1.608994562  | 2.753607972 | 11.50858601  | 1.04E-27 | 1.36E-26 | 51.78319151 |
| HRCT1     | 1.182065787  | 1.348929502 | 11.50623731  | 1.07E-27 | 1.39E-26 | 51.76126274 |
| SYT7      | -2.111597916 | 2.876695396 | -11.48849656 | 1.26E-27 | 1.64E-26 | 51.59571492 |
| NCAPG2    | -1.151387568 | 2.200262107 | -11.4869314  | 1.28E-27 | 1.66E-26 | 51.58111729 |
| SFTPD     | 3.581199738  | 6.194822311 | 11.48174031  | 1.34E-27 | 1.74E-26 | 51.53271081 |
| SLCO2A1   | 1.762080118  | 3.583129752 | 11.46076524  | 1.63E-27 | 2.10E-26 | 51.33725942 |
| MTHFD2    | -1.340772927 | 3.888746607 | -11.43847448 | 2.01E-27 | 2.58E-26 | 51.129793   |
| KIF23     | -1.245889747 | 1.675629073 | -11.41661679 | 2.47E-27 | 3.16E-26 | 50.92660301 |
| TUBB6     | 1.338965697  | 3.630188911 | 11.41289717  | 2.56E-27 | 3.27E-26 | 50.89204952 |
| CYGB      | 1.023921408  | 2.659433615 | 11.4119195   | 2.58E-27 | 3.30E-26 | 50.88296865 |
| TPPP      | 1.544517841  | 1.979964791 | 11.40902     | 2.65E-27 | 3.38E-26 | 50.85604004 |
| C11orf96  | 1.66949463   | 3.569977815 | 11.40797171  | 2.68E-27 | 3.42E-26 | 50.84630533 |
| KCTD12    | 1.419061979  | 4.302079561 | 11.4068598   | 2.71E-27 | 3.45E-26 | 50.83598035 |
| ADGRE5    | 1.258425399  | 4.531514795 | 11.39582661  | 3.00E-27 | 3.81E-26 | 50.73356302 |
| CDCA4     | -1.126598567 | 2.917171548 | -11.39258654 | 3.10E-27 | 3.93E-26 | 50.70349834 |
| NAXE      | -1.07531907  | 5.833932668 | -11.38506574 | 3.32E-27 | 4.20E-26 | 50.63373358 |
| CCNE1     | -1.4438082   | 1.728811702 | -11.38053439 | 3.47E-27 | 4.38E-26 | 50.59171357 |
| FCN1      | 1.398080957  | 1.712276977 | 11.37823846  | 3.54E-27 | 4.47E-26 | 50.57042709 |
| SPC25     | -1.160555914 | 1.604796086 | -11.37111569 | 3.78E-27 | 4.77E-26 | 50.50440611 |
| PLEKHO2   | 1.050009876  | 3.826186918 | 11.36942341  | 3.84E-27 | 4.84E-26 | 50.48872426 |
| FAM83D    | -1.514867732 | 2.403214255 | -11.36554937 | 3.99E-27 | 5.02E-26 | 50.45283002 |
| ADGRL4    | 1.025654685  | 2.526372072 | 11.36356004  | 4.06E-27 | 5.10E-26 | 50.43440131 |
| RASAL1    | -1.30597779  | 1.346988547 | -11.35600334 | 4.36E-27 | 5.47E-26 | 50.36441608 |
| HYOU1     | -1.078653456 | 4.968781853 | -11.35391531 | 4.44E-27 | 5.56E-26 | 50.34508328 |

|          |              |             |              |          |          |             |
|----------|--------------|-------------|--------------|----------|----------|-------------|
| NFIX     | 1.574075215  | 3.612726715 | 11.34444348  | 4.85E-27 | 6.07E-26 | 50.25741298 |
| SNX25    | 1.212558874  | 3.058741633 | 11.33117741  | 5.49E-27 | 6.86E-26 | 50.13470133 |
| CREB3L4  | -1.119449292 | 3.108724436 | -11.33072965 | 5.52E-27 | 6.88E-26 | 50.1305611  |
| PPP1R35  | -1.134728571 | 3.831854447 | -11.32502761 | 5.82E-27 | 7.25E-26 | 50.07784617 |
| ADAM8    | -1.63170119  | 3.466315393 | -11.3199059  | 6.10E-27 | 7.58E-26 | 50.03051068 |
| GMDS     | -1.098271246 | 2.812739676 | -11.31580767 | 6.34E-27 | 7.86E-26 | 49.9926441  |
| FHL2     | -1.651421807 | 2.941219383 | -11.30579919 | 6.96E-27 | 8.62E-26 | 49.90020476 |
| P2RY6    | -1.580426824 | 2.043704741 | -11.28469038 | 8.47E-27 | 1.04E-25 | 49.70541164 |
| NDNF     | 2.293773404  | 3.963982044 | 11.27791053  | 9.02E-27 | 1.11E-25 | 49.6428958  |
| TTK      | -1.244838443 | 1.410601581 | -11.25899875 | 1.08E-26 | 1.32E-25 | 49.46863974 |
| TRIP13   | -1.590699241 | 2.372144268 | -11.24596459 | 1.21E-26 | 1.48E-25 | 49.34864921 |
| TMEM132A | -1.456498842 | 2.797444453 | -11.24225066 | 1.26E-26 | 1.53E-25 | 49.3144755  |
| MROH6    | -1.698118691 | 2.972243266 | -11.2411594  | 1.27E-26 | 1.54E-25 | 49.30443563 |
| DTL      | -1.141304898 | 1.866544114 | -11.23720003 | 1.32E-26 | 1.60E-25 | 49.26801371 |
| PODXL2   | -2.327385126 | 3.831293492 | -11.20078797 | 1.84E-26 | 2.22E-25 | 48.93344574 |
| SPDEF    | -2.297363252 | 3.643242227 | -11.19720047 | 1.91E-26 | 2.29E-25 | 48.90051988 |
| SFTPA1   | 4.784181136  | 8.388364267 | 11.1909557   | 2.02E-26 | 2.42E-25 | 48.84322193 |
| SLC15A3  | 1.252168079  | 3.093852651 | 11.18970303  | 2.04E-26 | 2.45E-25 | 48.83173071 |
| FBP1     | 1.588750237  | 5.863903244 | 11.18638711  | 2.11E-26 | 2.52E-25 | 48.80131651 |
| CENPM    | -1.225952658 | 2.245655848 | -11.176141   | 2.32E-26 | 2.76E-25 | 48.70737368 |
| SCGB1A1  | 5.13775958   | 5.129010696 | 11.17422833  | 2.36E-26 | 2.81E-25 | 48.68984322 |
| LARGE2   | -1.746170807 | 3.138035637 | -11.16153092 | 2.65E-26 | 3.14E-25 | 48.5735146  |
| ZDHHC9   | -1.228264994 | 5.050491404 | -11.15367794 | 2.85E-26 | 3.37E-25 | 48.50161114 |
| MEST     | -1.194981244 | 3.782415157 | -11.15162743 | 2.90E-26 | 3.43E-25 | 48.48284158 |
| CHTF18   | -1.052569907 | 1.793860716 | -11.14932228 | 2.97E-26 | 3.51E-25 | 48.46174381 |
| GRTP1    | -1.03644509  | 2.308358961 | -11.14529707 | 3.08E-26 | 3.63E-25 | 48.42491002 |
| GADD45B  | 1.421708165  | 4.811807062 | 11.13559251  | 3.37E-26 | 3.96E-25 | 48.33614081 |
| COA6     | -1.067699349 | 4.151005468 | -11.13374521 | 3.43E-26 | 4.03E-25 | 48.31924887 |
| LSR      | -1.274006969 | 6.174933924 | -11.12922485 | 3.57E-26 | 4.19E-25 | 48.27792181 |
| ASNS     | -1.223705159 | 3.012904245 | -11.12628431 | 3.67E-26 | 4.30E-25 | 48.25104393 |
| PABPC1   | -1.020075024 | 8.16113819  | -11.1135592  | 4.13E-26 | 4.82E-25 | 48.13478304 |
| KIF14    | -1.002916444 | 1.036184387 | -11.11171168 | 4.20E-26 | 4.89E-25 | 48.11791067 |
| IDH2     | -1.095308139 | 5.544324423 | -11.09491779 | 4.90E-26 | 5.70E-25 | 47.96462364 |
| DEPDC1   | -1.172107727 | 1.222297749 | -11.08070203 | 5.58E-26 | 6.48E-25 | 47.83498548 |
| CP       | -2.702493254 | 4.572565737 | -11.07816387 | 5.71E-26 | 6.62E-25 | 47.81185039 |
| ALG1L    | -1.934179431 | 2.521994435 | -11.07125138 | 6.09E-26 | 7.04E-25 | 47.74886124 |
| CPAMD8   | 1.585774451  | 1.758625935 | 11.06239893  | 6.60E-26 | 7.63E-25 | 47.66823147 |
| RNASEH2A | -1.092514057 | 3.350969038 | -11.05717976 | 6.93E-26 | 7.99E-25 | 47.62071383 |
| TSPAN6   | -1.04058528  | 3.8098121   | -11.04107243 | 8.03E-26 | 9.24E-25 | 47.47415692 |
| VIM      | 1.278239673  | 7.157110234 | 11.04090526  | 8.04E-26 | 9.25E-25 | 47.47263663 |
| TNS3     | 1.042516019  | 3.855585421 | 11.02055384  | 9.69E-26 | 1.11E-24 | 47.2876635  |
| ANKRD22  | -1.857510083 | 2.937786922 | -11.01414428 | 1.03E-25 | 1.17E-24 | 47.22945304 |
| FBXO32   | -1.406372945 | 2.839511851 | -11.00979789 | 1.07E-25 | 1.22E-24 | 47.18999244 |
| GYG2     | -1.264685743 | 1.879650813 | -11.00551688 | 1.11E-25 | 1.27E-24 | 47.15113534 |
| FUT8     | -1.118741062 | 3.158502083 | -10.99649775 | 1.21E-25 | 1.38E-24 | 47.06930423 |
| RASSF8   | 1.192673882  | 2.005776323 | 10.99232258  | 1.26E-25 | 1.43E-24 | 47.03143736 |
| PMP22    | 1.20845576   | 4.661085629 | 10.99148512  | 1.26E-25 | 1.44E-24 | 47.02384318 |
| F2RL3    | 1.07035046   | 1.401480102 | 10.98024496  | 1.40E-25 | 1.59E-24 | 46.92195167 |
| SLCO2B1  | 1.461588498  | 3.228157275 | 10.97883395  | 1.42E-25 | 1.61E-24 | 46.90916571 |
| MCM10    | -1.101023956 | 1.176082513 | -10.97523866 | 1.47E-25 | 1.66E-24 | 46.87659163 |
| SAMHD1   | 1.204511604  | 4.694295289 | 10.96193158  | 1.66E-25 | 1.87E-24 | 46.75608724 |
| FUT3     | -1.612042331 | 2.935027611 | -10.95727626 | 1.73E-25 | 1.95E-24 | 46.7139527  |
| NET1     | -1.209562262 | 5.114964979 | -10.95529112 | 1.76E-25 | 1.99E-24 | 46.695989   |
| MSMO1    | 1.034025548  | 4.812865257 | 10.9447919   | 1.94E-25 | 2.18E-24 | 46.60101633 |
| CEACAM1  | -1.500257328 | 3.095580858 | -10.91809385 | 2.47E-25 | 2.77E-24 | 46.35978199 |
| CYS1     | 1.463933273  | 1.449488543 | 10.90947519  | 2.67E-25 | 2.98E-24 | 46.28198893 |



|          |              |             |              |          |          |             |
|----------|--------------|-------------|--------------|----------|----------|-------------|
| MAFF     | 1.00179792   | 2.745158585 | 10.8931791   | 3.10E-25 | 3.44E-24 | 46.1350084  |
| TSPAN12  | 1.293898134  | 3.705565426 | 10.88211573  | 3.43E-25 | 3.80E-24 | 46.03530583 |
| MATN3    | 1.40268094   | 1.887542115 | 10.88055334  | 3.48E-25 | 3.85E-24 | 46.02123095 |
| MNDA     | 1.486406127  | 3.203003019 | 10.86574443  | 3.98E-25 | 4.38E-24 | 45.88789022 |
| RAC3     | -1.572626635 | 2.90619622  | -10.85189636 | 4.51E-25 | 4.96E-24 | 45.7633089  |
| SFTPA2   | 4.580828173  | 8.646648369 | 10.84635793  | 4.74E-25 | 5.21E-24 | 45.71351282 |
| RETREG1  | 1.343004083  | 1.789488582 | 10.83003847  | 5.50E-25 | 6.03E-24 | 45.56688152 |
| DERL3    | -1.69427154  | 3.044858089 | -10.82953169 | 5.52E-25 | 6.05E-24 | 45.5623304  |
| SEMA3B   | 1.772577899  | 2.626240276 | 10.82385226  | 5.82E-25 | 6.35E-24 | 45.51133608 |
| TPSAB1   | 1.875079974  | 3.163307662 | 10.81840162  | 6.11E-25 | 6.66E-24 | 45.46241252 |
| PCSK9    | 1.725472725  | 1.472318979 | 10.81740467  | 6.17E-25 | 6.71E-24 | 45.45346594 |
| BCL2L15  | -1.445626575 | 1.652459471 | -10.81155004 | 6.50E-25 | 7.08E-24 | 45.40093757 |
| SKA1     | -1.127852981 | 1.309274658 | -10.80744681 | 6.75E-25 | 7.33E-24 | 45.36413417 |
| APOL3    | 1.230344647  | 2.791043645 | 10.80138556  | 7.13E-25 | 7.73E-24 | 45.30978538 |
| DNAJB4   | 1.071968282  | 2.487747307 | 10.78058802  | 8.60E-25 | 9.30E-24 | 45.12345529 |
| PIMREG   | -1.222669719 | 1.40560818  | -10.77270634 | 9.24E-25 | 9.96E-24 | 45.05290349 |
| IL6      | 1.834434473  | 1.976961823 | 10.76492465  | 9.91E-25 | 1.07E-23 | 44.98328012 |
| MMP1     | -3.065893268 | 3.703366321 | -10.75452694 | 1.09E-24 | 1.17E-23 | 44.89030312 |
| MTURN    | 1.20311589   | 2.732376196 | 10.75054014  | 1.13E-24 | 1.21E-23 | 44.85466868 |
| ESPL1    | -1.061435796 | 1.197908758 | -10.74983277 | 1.14E-24 | 1.22E-23 | 44.84834701 |
| VGLL3    | 1.124427972  | 1.467894614 | 10.73790586  | 1.26E-24 | 1.35E-23 | 44.74179996 |
| NSMF     | -1.048901956 | 3.41632492  | -10.73503344 | 1.30E-24 | 1.38E-23 | 44.71615139 |
| STEAP1   | -1.949658345 | 3.235327203 | -10.7259564  | 1.41E-24 | 1.50E-23 | 44.63513009 |
| B3GALNT1 | 1.159433811  | 2.095958911 | 10.72257393  | 1.45E-24 | 1.54E-23 | 44.60495    |
| ARHGAP29 | 1.011690316  | 2.124614001 | 10.72227321  | 1.46E-24 | 1.55E-23 | 44.60226713 |
| CHPF     | -1.182303795 | 5.335279751 | -10.7122289  | 1.59E-24 | 1.69E-23 | 44.51268552 |
| KCNJ8    | 1.304689002  | 2.516601633 | 10.69805878  | 1.81E-24 | 1.91E-23 | 44.38640217 |
| AK1      | 1.205818754  | 2.903693924 | 10.687541    | 1.99E-24 | 2.09E-23 | 44.29274026 |
| RHBDL1   | -1.314553862 | 1.563028948 | -10.68641459 | 2.01E-24 | 2.11E-23 | 44.28271312 |
| AQP9     | 1.458190866  | 2.135801691 | 10.68591675  | 2.02E-24 | 2.12E-23 | 44.27828156 |
| PAQR4    | -1.07490751  | 2.579527777 | -10.68245711 | 2.08E-24 | 2.19E-23 | 44.24748969 |
| SLFN13   | -1.165574106 | 2.341891954 | -10.67588602 | 2.21E-24 | 2.32E-23 | 44.18902313 |
| PKIG     | 1.168904939  | 3.929247696 | 10.65778465  | 2.60E-24 | 2.71E-23 | 44.02808934 |
| ALDH2    | 1.271583692  | 4.537669167 | 10.64481226  | 2.92E-24 | 3.04E-23 | 43.91286799 |
| SOX12    | -1.080961078 | 2.838256118 | -10.64228449 | 2.98E-24 | 3.11E-23 | 43.89042706 |
| SELE     | 1.021798264  | 0.696599291 | 10.61992903  | 3.65E-24 | 3.79E-23 | 43.69211642 |
| C11orf97 | 1.236571748  | 0.613881304 | 10.60963643  | 4.00E-24 | 4.14E-23 | 43.60090677 |
| LAGE3    | -1.085149862 | 4.408226801 | -10.60925229 | 4.01E-24 | 4.15E-23 | 43.59750373 |
| SULF1    | -1.894352401 | 3.57054792  | -10.60878287 | 4.03E-24 | 4.17E-23 | 43.5933454  |
| CCND2    | 1.215385372  | 2.691746485 | 10.59498067  | 4.56E-24 | 4.69E-23 | 43.47113441 |
| ZFP36    | 1.684379938  | 6.752455844 | 10.58445697  | 5.01E-24 | 5.14E-23 | 43.37802443 |
| MYLK     | 1.136781697  | 2.43675302  | 10.57498719  | 5.45E-24 | 5.58E-23 | 43.29429227 |
| SMPDL3B  | -1.553123595 | 4.223277745 | -10.57406981 | 5.49E-24 | 5.63E-23 | 43.28618346 |
| SIRPA    | 1.223828375  | 3.592084217 | 10.57148715  | 5.62E-24 | 5.75E-23 | 43.26335755 |
| PTPRH    | -1.667357945 | 1.629457312 | -10.55464466 | 6.53E-24 | 6.66E-23 | 43.11459322 |
| MAPK4    | 1.03507427   | 0.522017887 | 10.5529772   | 6.63E-24 | 6.76E-23 | 43.09987368 |
| CTGF     | 1.653962024  | 6.143291919 | 10.54336782  | 7.22E-24 | 7.34E-23 | 43.01507767 |
| RASSF2   | 1.13633208   | 2.827481163 | 10.54226602  | 7.29E-24 | 7.41E-23 | 43.00535833 |
| ARHGEF19 | -1.243486435 | 3.214402642 | -10.54129779 | 7.35E-24 | 7.47E-23 | 42.99681789 |
| IHH      | 1.208918442  | 0.583247307 | 10.52934295  | 8.18E-24 | 8.29E-23 | 42.89141129 |
| RHPN1    | -1.42458701  | 2.915160854 | -10.52919349 | 8.19E-24 | 8.30E-23 | 42.890094   |
| LY86     | 1.372996147  | 3.024804202 | 10.51944609  | 8.93E-24 | 9.02E-23 | 42.8042111  |
| PCNA     | -1.039566827 | 5.714736764 | -10.51656463 | 9.16E-24 | 9.24E-23 | 42.77883324 |
| LIMK1    | -1.030760533 | 3.715645381 | -10.51349228 | 9.42E-24 | 9.48E-23 | 42.75177935 |
| MRPL12   | -1.134474837 | 4.363559322 | -10.5064048  | 1.00E-23 | 1.01E-22 | 42.68939015 |
| DUSP1    | 1.789879794  | 7.023695321 | 10.50368861  | 1.03E-23 | 1.03E-22 | 42.66548776 |

|           |              |             |              |          |          |             |
|-----------|--------------|-------------|--------------|----------|----------|-------------|
| C11orf88  | 1.158441005  | 0.60289551  | 10.50103406  | 1.05E-23 | 1.05E-22 | 42.64213184 |
| COL5A2    | -1.734932855 | 4.279200348 | -10.49331368 | 1.13E-23 | 1.13E-22 | 42.57422715 |
| AQP1      | 2.496954327  | 6.216926485 | 10.48747565  | 1.19E-23 | 1.18E-22 | 42.52290115 |
| C1QA      | 1.75209706   | 7.091776016 | 10.47946212  | 1.27E-23 | 1.27E-22 | 42.45248036 |
| ADCY9     | 1.015092858  | 2.380407616 | 10.47430431  | 1.33E-23 | 1.32E-22 | 42.40717411 |
| RAD51AP1  | -1.194496289 | 1.966349642 | -10.47270411 | 1.35E-23 | 1.34E-22 | 42.39312101 |
| EMP1      | 1.37940884   | 4.1244083   | 10.47030704  | 1.38E-23 | 1.37E-22 | 42.37207243 |
| SLC51B    | 1.399079413  | 1.326720076 | 10.46794796  | 1.41E-23 | 1.40E-22 | 42.35136063 |
| PRR11     | -1.286733196 | 2.053315144 | -10.46446438 | 1.45E-23 | 1.44E-22 | 42.32078202 |
| CCL24     | 1.500983087  | 1.393715309 | 10.45889838  | 1.53E-23 | 1.51E-22 | 42.27193825 |
| PREX1     | 1.075731661  | 2.991091962 | 10.45723703  | 1.55E-23 | 1.53E-22 | 42.25736273 |
| ATOH8     | 1.829866617  | 2.239167549 | 10.45246836  | 1.62E-23 | 1.60E-22 | 42.21553435 |
| TYROBP    | 1.576718025  | 6.271591731 | 10.44447696  | 1.74E-23 | 1.71E-22 | 42.14546689 |
| C7        | 2.29106285   | 3.582781099 | 10.44091206  | 1.79E-23 | 1.76E-22 | 42.11422205 |
| NCKAP1L   | 1.158702615  | 2.465095809 | 10.43971031  | 1.81E-23 | 1.78E-22 | 42.10369093 |
| CADM1     | 1.609151568  | 3.13025425  | 10.41883193  | 2.18E-23 | 2.13E-22 | 41.92086061 |
| PTGFRN    | -1.052416051 | 3.765614187 | -10.40366026 | 2.49E-23 | 2.43E-22 | 41.78815958 |
| IGFBP3    | -1.926899012 | 5.520419165 | -10.39438752 | 2.70E-23 | 2.63E-22 | 41.70711922 |
| EHD2      | 1.32270158   | 5.25641632  | 10.39399738  | 2.71E-23 | 2.64E-22 | 41.70371062 |
| ARRDC4    | 1.083133109  | 2.710187794 | 10.39353089  | 2.72E-23 | 2.65E-22 | 41.69963503 |
| JAM3      | 1.0337253    | 2.261813007 | 10.38867528  | 2.84E-23 | 2.76E-22 | 41.65722081 |
| PTGDS     | 1.968515308  | 4.49880194  | 10.3868797   | 2.89E-23 | 2.80E-22 | 41.64153958 |
| BICDL1    | -1.244246712 | 2.057901627 | -10.38117913 | 3.04E-23 | 2.94E-22 | 41.5917676  |
| SBK1      | -1.563970421 | 2.430352237 | -10.37917949 | 3.09E-23 | 2.99E-22 | 41.57431303 |
| DCN       | 1.583655099  | 4.781792259 | 10.37820178  | 3.12E-23 | 3.01E-22 | 41.56577958 |
| DTX2      | -1.033254698 | 3.026041001 | -10.36086098 | 3.63E-23 | 3.49E-22 | 41.41452037 |
| MICALL2   | -1.145049475 | 2.553254569 | -10.3575763  | 3.74E-23 | 3.59E-22 | 41.38588837 |
| ETS1      | 1.139513637  | 3.963820129 | 10.35344809  | 3.88E-23 | 3.71E-22 | 41.34991237 |
| TUBA1C    | -1.005458807 | 4.650482024 | -10.35324595 | 3.88E-23 | 3.72E-22 | 41.34815101 |
| PABPC1L   | -1.492103548 | 2.606872447 | -10.32206709 | 5.11E-23 | 4.86E-22 | 41.07675735 |
| F12       | -1.054135442 | 1.27246379  | -10.3149503  | 5.44E-23 | 5.16E-22 | 41.01488847 |
| RPL39L    | -1.687853582 | 3.337210486 | -10.31029825 | 5.66E-23 | 5.37E-22 | 40.97446223 |
| SEC14L4   | 1.179391319  | 1.315995947 | 10.28952582  | 6.79E-23 | 6.40E-22 | 40.79410294 |
| WISP1     | -1.20362785  | 1.81148159  | -10.27776115 | 7.53E-23 | 7.08E-22 | 40.6920654  |
| CELF2     | 1.187226827  | 3.060526796 | 10.26629159  | 8.33E-23 | 7.81E-22 | 40.5926646  |
| FAM216B   | 1.677264196  | 1.073538686 | 10.26050149  | 8.76E-23 | 8.19E-22 | 40.5425138  |
| OIP5      | -1.021168423 | 1.396817873 | -10.26017926 | 8.78E-23 | 8.21E-22 | 40.53972343 |
| CPA3      | 1.979023979  | 3.448482454 | 10.24955438  | 9.64E-23 | 8.99E-22 | 40.4477489  |
| NQO1      | -2.271201602 | 5.465820844 | -10.22966522 | 1.15E-22 | 1.07E-21 | 40.27575432 |
| ARHGAP11A | -1.04787891  | 1.655531593 | -10.22301156 | 1.22E-22 | 1.13E-21 | 40.21826722 |
| GREM1     | -1.686796917 | 1.682058072 | -10.21934186 | 1.25E-22 | 1.16E-21 | 40.18657231 |
| CYP27B1   | -1.020177259 | 1.415384076 | -10.20992361 | 1.36E-22 | 1.26E-21 | 40.10526368 |
| PDPN      | 1.460760292  | 2.984230793 | 10.20277688  | 1.45E-22 | 1.34E-21 | 40.04359976 |
| FAM83H    | -1.090288386 | 4.408438576 | -10.191425   | 1.60E-22 | 1.47E-21 | 39.94571406 |
| PRELP     | 1.622808679  | 3.695467895 | 10.19116583  | 1.60E-22 | 1.47E-21 | 39.94348013 |
| CNN1      | 1.302831193  | 2.335401092 | 10.18451398  | 1.70E-22 | 1.56E-21 | 39.88615824 |
| LST1      | 1.326131707  | 2.994446826 | 10.18399226  | 1.71E-22 | 1.56E-21 | 39.88166341 |
| C9orf24   | 1.821310221  | 1.334358509 | 10.17462112  | 1.85E-22 | 1.69E-21 | 39.80095493 |
| CERCAM    | -1.187372365 | 3.135529864 | -10.17380974 | 1.87E-22 | 1.70E-21 | 39.79396933 |
| SLC22A18  | -1.06654383  | 2.734147389 | -10.16873001 | 1.95E-22 | 1.78E-21 | 39.75024437 |
| DBN1      | -1.096729179 | 4.253666972 | -10.16416994 | 2.03E-22 | 1.85E-21 | 39.71100536 |
| C1QB      | 1.780343132  | 6.995843444 | 10.16086244  | 2.09E-22 | 1.90E-21 | 39.68255217 |
| COL5A1    | -1.697524723 | 4.332137109 | -10.15670192 | 2.16E-22 | 1.97E-21 | 39.64676995 |
| GABARAPL1 | 1.027537586  | 4.156610224 | 10.14164934  | 2.47E-22 | 2.24E-21 | 39.5173964  |
| HCK       | 1.373020689  | 3.501726771 | 10.11646261  | 3.07E-22 | 2.77E-21 | 39.30122005 |
| GRAMD2A   | 1.304135436  | 2.254846624 | 10.1162669   | 3.07E-22 | 2.78E-21 | 39.29954173 |

|          |              |             |              |          |          |             |
|----------|--------------|-------------|--------------|----------|----------|-------------|
| LAPTM4B  | -1.301474632 | 6.379896993 | -10.11271726 | 3.17E-22 | 2.86E-21 | 39.26910577 |
| SDF2L1   | -1.055938613 | 4.736259912 | -10.11028371 | 3.24E-22 | 2.92E-21 | 39.24824396 |
| MCM7     | -1.09898589  | 4.599031895 | -10.10866912 | 3.28E-22 | 2.96E-21 | 39.23440462 |
| IRF7     | -1.122760235 | 4.150881128 | -10.10363366 | 3.43E-22 | 3.09E-21 | 39.19125354 |
| ETV5     | 1.070928119  | 3.232332393 | 10.1005864   | 3.52E-22 | 3.17E-21 | 39.16514739 |
| AADAC    | 1.70423263   | 1.271233001 | 10.09868213  | 3.58E-22 | 3.21E-21 | 39.14883622 |
| TNFRSF18 | -1.526442035 | 2.288958338 | -10.09625782 | 3.65E-22 | 3.28E-21 | 39.1280736  |
| DAB2     | 1.066808567  | 3.2810039   | 10.09033066  | 3.85E-22 | 3.45E-21 | 39.07732616 |
| CHI3L2   | 1.696583038  | 2.317170246 | 10.08478356  | 4.03E-22 | 3.61E-21 | 39.0298515  |
| KRT8     | -1.282766094 | 7.489288144 | -10.07922846 | 4.23E-22 | 3.78E-21 | 38.98232657 |
| HPGDS    | 1.159991711  | 1.518804124 | 10.07417758  | 4.42E-22 | 3.95E-21 | 38.93913118 |
| NFAM1    | 1.019543697  | 1.915095447 | 10.04820826  | 5.53E-22 | 4.91E-21 | 38.71727898 |
| PRR36    | -1.337357697 | 2.245818485 | -10.01557037 | 7.33E-22 | 6.46E-21 | 38.43902595 |
| C15orf48 | -2.267828855 | 4.365873775 | -10.00605802 | 7.95E-22 | 6.99E-21 | 38.35804808 |
| CNFN     | -1.367845486 | 1.909093642 | -9.998197976 | 8.51E-22 | 7.46E-21 | 38.29117689 |
| HLF      | 1.494611132  | 1.787824688 | 9.987805567  | 9.30E-22 | 8.15E-21 | 38.20281758 |
| FAP      | -1.155672856 | 1.738882336 | -9.981041138 | 9.86E-22 | 8.63E-21 | 38.14533906 |
| CES1     | 2.518662563  | 4.163117735 | 9.96323892   | 1.15E-21 | 1.00E-20 | 37.99420132 |
| TPSB2    | 1.907163715  | 3.113757391 | 9.942327138  | 1.37E-21 | 1.19E-20 | 37.81690632 |
| IRX1     | 1.277323134  | 0.841602341 | 9.930279713  | 1.52E-21 | 1.32E-20 | 37.71488452 |
| MMP12    | -2.443871408 | 2.970614618 | -9.913580814 | 1.76E-21 | 1.52E-20 | 37.57361664 |
| CYR61    | 1.59624998   | 6.025423648 | 9.909953788  | 1.81E-21 | 1.56E-20 | 37.54295521 |
| HNF4G    | -1.080157706 | 1.180353334 | -9.907549308 | 1.85E-21 | 1.59E-20 | 37.52263307 |
| XDH      | -1.454906848 | 1.599795808 | -9.903824841 | 1.91E-21 | 1.64E-20 | 37.49116155 |
| ADAM28   | -1.21450908  | 1.903967373 | -9.901865961 | 1.94E-21 | 1.67E-20 | 37.47461249 |
| CILP2    | -1.353564884 | 1.47792776  | -9.900371879 | 1.97E-21 | 1.69E-20 | 37.46199171 |
| PLXNB3   | -1.394582595 | 1.623363697 | -9.888585593 | 2.17E-21 | 1.86E-20 | 37.36247793 |
| TFAP2A   | -1.158033318 | 1.226851315 | -9.871754168 | 2.51E-21 | 2.14E-20 | 37.22051246 |
| RACGAP1  | -1.099539688 | 2.880140686 | -9.867789049 | 2.60E-21 | 2.21E-20 | 37.18709338 |
| CXCL16   | 1.029680064  | 5.659321468 | 9.865328765  | 2.65E-21 | 2.25E-20 | 37.16636223 |
| CDH3     | -2.009935363 | 3.51604381  | -9.86426968  | 2.67E-21 | 2.27E-20 | 37.15743916 |
| PXDC1    | 1.036359166  | 3.909869778 | 9.863719946  | 2.69E-21 | 2.28E-20 | 37.15280778 |
| PLEKHH2  | 1.030498941  | 1.591240277 | 9.863559769  | 2.69E-21 | 2.28E-20 | 37.15145836 |
| TNNI2    | 1.221485793  | 1.383229292 | 9.860071131  | 2.77E-21 | 2.35E-20 | 37.12207197 |
| ARHGAP40 | -1.479358873 | 1.63432664  | -9.851740009 | 2.98E-21 | 2.51E-20 | 37.05192493 |
| CDKN2B   | 1.323302856  | 2.711298853 | 9.846882592  | 3.10E-21 | 2.61E-20 | 37.01104546 |
| ETV1     | 1.198053645  | 2.255686878 | 9.842674657  | 3.21E-21 | 2.71E-20 | 36.97564352 |
| SMIM22   | -1.579549962 | 4.226861572 | -9.838392126 | 3.33E-21 | 2.80E-20 | 36.939625   |
| CXCL2    | 1.960743925  | 4.235488213 | 9.835699759  | 3.41E-21 | 2.86E-20 | 36.91698636 |
| C1orf21  | 1.012485711  | 2.180514118 | 9.828190475  | 3.64E-21 | 3.04E-20 | 36.85386815 |
| THY1     | -1.371840236 | 3.615402138 | -9.8165339   | 4.01E-21 | 3.35E-20 | 36.75595829 |
| GALNT14  | -1.601206163 | 1.860542423 | -9.814292105 | 4.09E-21 | 3.41E-20 | 36.73713771 |
| SRD5A3   | -1.279925971 | 3.875534301 | -9.803561331 | 4.48E-21 | 3.72E-20 | 36.64709178 |
| CXCL13   | -2.365811748 | 3.484838415 | -9.799011711 | 4.66E-21 | 3.86E-20 | 36.60893536 |
| ADGRG1   | -1.249832851 | 4.193397277 | -9.791342031 | 4.97E-21 | 4.11E-20 | 36.5446404  |
| BIK      | -1.352508764 | 2.71722549  | -9.777735472 | 5.57E-21 | 4.59E-20 | 36.43066475 |
| EVI2B    | 1.231853748  | 3.680966601 | 9.769860618  | 5.96E-21 | 4.90E-20 | 36.36475245 |
| VSIG2    | 2.279888866  | 3.472899383 | 9.763602067  | 6.28E-21 | 5.15E-20 | 36.31239557 |
| PKDCC    | 1.247529109  | 2.021023796 | 9.758109003  | 6.58E-21 | 5.39E-20 | 36.26646221 |
| KCNJ15   | 1.702924499  | 2.284558219 | 9.750817293  | 7.00E-21 | 5.72E-20 | 36.20551695 |
| CXCL12   | 1.278312422  | 2.720876672 | 9.744723363  | 7.37E-21 | 6.01E-20 | 36.15460787 |
| ITM2C    | -1.135563261 | 5.583728957 | -9.741185038 | 7.59E-21 | 6.18E-20 | 36.12505891 |
| CX3CR1   | 1.036133358  | 1.173019012 | 9.740001058  | 7.67E-21 | 6.24E-20 | 36.11517306 |
| FOXF2    | 1.120049261  | 2.009073761 | 9.732729533  | 8.15E-21 | 6.63E-20 | 36.05447706 |
| TEKT1    | 1.369730548  | 0.833911301 | 9.730782446  | 8.29E-21 | 6.73E-20 | 36.03823007 |
| DHCR24   | 1.05726738   | 7.187552294 | 9.723318154  | 8.83E-21 | 7.15E-20 | 35.97596764 |

|            |              |             |              |          |          |             |
|------------|--------------|-------------|--------------|----------|----------|-------------|
| SLC22A18AS | -1.093984104 | 1.509126218 | -9.717805097 | 9.25E-21 | 7.48E-20 | 35.93000312 |
| MANEAL     | -1.238346656 | 2.546164971 | -9.706705955 | 1.02E-20 | 8.19E-20 | 35.83752183 |
| ADGRD1     | 1.24091957   | 1.645088874 | 9.703936831  | 1.04E-20 | 8.37E-20 | 35.81446047 |
| CPXM1      | -1.401268996 | 2.361163523 | -9.701959742 | 1.06E-20 | 8.51E-20 | 35.7979981  |
| PITX1      | -1.661225282 | 1.70455808  | -9.689532966 | 1.17E-20 | 9.42E-20 | 35.69458066 |
| CABCOCO1   | 1.189465217  | 1.043269603 | 9.678049609  | 1.29E-20 | 1.03E-19 | 35.599099   |
| TNFRSF25   | -1.17120291  | 1.970650937 | -9.669562591 | 1.39E-20 | 1.11E-19 | 35.52858347 |
| KLF15      | 1.288313742  | 1.731051474 | 9.660740721  | 1.49E-20 | 1.19E-19 | 35.45533285 |
| CYP24A1    | -2.665548314 | 2.666937136 | -9.649574803 | 1.64E-20 | 1.30E-19 | 35.3626878  |
| ARHGAP30   | 1.054887522  | 3.110542126 | 9.649187657  | 1.65E-20 | 1.31E-19 | 35.35947698 |
| DNTTIP1    | -1.205947941 | 4.777428082 | -9.640196078 | 1.77E-20 | 1.40E-19 | 35.28493085 |
| ATF3       | 1.568854984  | 3.557185953 | 9.637915702  | 1.81E-20 | 1.43E-19 | 35.26603297 |
| ZP3        | -1.000067722 | 1.526211701 | -9.629074154 | 1.95E-20 | 1.54E-19 | 35.19279193 |
| HCAR2      | 1.448729486  | 1.8306792   | 9.621311929  | 2.08E-20 | 1.64E-19 | 35.12853161 |
| CST1       | -2.671866206 | 2.560018398 | -9.616421072 | 2.17E-20 | 1.70E-19 | 35.08806136 |
| UBE2S      | -1.194664234 | 2.650613368 | -9.608369712 | 2.32E-20 | 1.82E-19 | 35.02147128 |
| IER5L      | -1.178816424 | 2.411281151 | -9.599322069 | 2.50E-20 | 1.95E-19 | 34.94668927 |
| TMEM45B    | -1.427166019 | 3.903021042 | -9.599281506 | 2.50E-20 | 1.95E-19 | 34.94635413 |
| TEF        | 1.003409156  | 2.803145487 | 9.570309335  | 3.18E-20 | 2.47E-19 | 34.70723174 |
| SLC17A9    | -1.367833904 | 2.067297242 | -9.560066761 | 3.47E-20 | 2.69E-19 | 34.62281945 |
| SCEL       | 1.799742301  | 3.491215441 | 9.559549763  | 3.48E-20 | 2.70E-19 | 34.61856044 |
| SDC2       | 1.15523074   | 3.457780945 | 9.553253414  | 3.67E-20 | 2.84E-19 | 34.56670472 |
| TSKU       | -1.345609634 | 3.789831602 | -9.547062519 | 3.86E-20 | 2.98E-19 | 34.51574162 |
| GBP4       | 1.370009211  | 3.275787288 | 9.521684771  | 4.77E-20 | 3.67E-19 | 34.30708361 |
| GCNT3      | -1.975666878 | 2.048732315 | -9.520906419 | 4.80E-20 | 3.69E-19 | 34.30069029 |
| RHOV       | -2.06928009  | 2.964249497 | -9.518848962 | 4.88E-20 | 3.75E-19 | 34.28379236 |
| SIGLEC14   | 1.014689051  | 1.669005878 | 9.511844314  | 5.18E-20 | 3.97E-19 | 34.2262829  |
| OTULINL    | 1.394133992  | 3.061620009 | 9.507666451  | 5.36E-20 | 4.11E-19 | 34.1919965  |
| PPP1R14D   | -2.502866995 | 2.525814655 | -9.506946356 | 5.39E-20 | 4.13E-19 | 34.18608802 |
| MAL        | 1.322423236  | 2.051473302 | 9.499822983  | 5.72E-20 | 4.37E-19 | 34.12765719 |
| ITGA11     | -1.386095948 | 1.813908251 | -9.494711401 | 5.97E-20 | 4.56E-19 | 34.08574808 |
| TBC1D2     | 1.103924323  | 3.862968137 | 9.492729032  | 6.06E-20 | 4.63E-19 | 34.06949933 |
| COL4A3     | 1.306409537  | 1.683876828 | 9.488652925  | 6.27E-20 | 4.78E-19 | 34.03609674 |
| DNAJC12    | -2.114934613 | 2.543169303 | -9.440597254 | 9.33E-20 | 7.03E-19 | 33.64308101 |
| EGR3       | 1.067354734  | 1.415728828 | 9.41134175   | 1.19E-19 | 8.88E-19 | 33.4045323  |
| NR4A1      | 1.801855559  | 3.673454094 | 9.402977911  | 1.27E-19 | 9.49E-19 | 33.33643318 |
| SNTN       | 1.174150711  | 0.824023296 | 9.392748948  | 1.38E-19 | 1.03E-18 | 33.25320825 |
| GPRC5A     | 1.543881512  | 5.981848386 | 9.388459889  | 1.43E-19 | 1.07E-18 | 33.21833132 |
| AK4        | -1.273976549 | 1.778836862 | -9.382146732 | 1.51E-19 | 1.12E-18 | 33.16701643 |
| METTL7B    | -1.697586754 | 2.912009139 | -9.38073092  | 1.53E-19 | 1.13E-18 | 33.15551184 |
| C6         | 1.040266283  | 0.684307784 | 9.378143293  | 1.56E-19 | 1.15E-18 | 33.13448859 |
| EGR1       | 1.696101329  | 5.868262006 | 9.372584649  | 1.63E-19 | 1.21E-18 | 33.08934162 |
| PTGIS      | 1.28561253   | 2.34142298  | 9.368206953  | 1.69E-19 | 1.25E-18 | 33.05380004 |
| DAPK1      | 1.115699693  | 3.399040554 | 9.362012924  | 1.78E-19 | 1.31E-18 | 33.00353284 |
| FCER1G     | 1.300835446  | 5.682806051 | 9.361844044  | 1.78E-19 | 1.31E-18 | 33.00216265 |
| FBLN1      | 1.387583911  | 4.387893553 | 9.360634496  | 1.80E-19 | 1.33E-18 | 32.99234962 |
| SGK1       | 1.108553484  | 3.471488931 | 9.355630024  | 1.88E-19 | 1.38E-18 | 32.95175838 |
| ITGAL      | 1.15578126   | 2.746830083 | 9.35023212   | 1.96E-19 | 1.44E-18 | 32.90799386 |
| NECTIN1    | -1.128252259 | 2.659648726 | -9.347891368 | 2.00E-19 | 1.47E-18 | 32.88902154 |
| SLCO4C1    | 1.360545676  | 1.829200381 | 9.345866977  | 2.03E-19 | 1.49E-18 | 32.8726162  |
| GOLGA7B    | -1.337241233 | 1.876742761 | -9.344152818 | 2.06E-19 | 1.51E-18 | 32.85872698 |
| ADAM12     | -1.239434241 | 1.515286556 | -9.338311443 | 2.16E-19 | 1.58E-18 | 32.81141043 |
| KRT18      | -1.107629399 | 7.620402757 | -9.321399135 | 2.49E-19 | 1.81E-18 | 32.67453923 |
| MB         | -1.524319893 | 1.836623068 | -9.319676372 | 2.52E-19 | 1.84E-18 | 32.66060716 |
| TUBA1A     | 1.15731831   | 5.332952225 | 9.316094107  | 2.60E-19 | 1.89E-18 | 32.63164326 |
| TUBA4B     | 1.196480576  | 0.79314722  | 9.302511971  | 2.90E-19 | 2.11E-18 | 32.52190123 |

|          |              |             |              |          |          |             |
|----------|--------------|-------------|--------------|----------|----------|-------------|
| MMP9     | -1.938400993 | 4.303706496 | -9.298432743 | 3.00E-19 | 2.18E-18 | 32.48896458 |
| KRTCAP3  | -1.302637937 | 4.814701268 | -9.296366359 | 3.05E-19 | 2.21E-18 | 32.47228416 |
| APLN     | 1.308113946  | 2.125102802 | 9.290735141  | 3.19E-19 | 2.31E-18 | 32.42684129 |
| CFAP77   | 1.016353339  | 0.615239206 | 9.288058684  | 3.26E-19 | 2.36E-18 | 32.40524989 |
| TMSB15A  | 1.032452691  | 0.837198753 | 9.285370186  | 3.34E-19 | 2.41E-18 | 32.38356598 |
| MORN5    | 1.38992138   | 0.949718408 | 9.281227683  | 3.45E-19 | 2.49E-18 | 32.35016394 |
| SIX1     | -1.448101739 | 2.122801121 | -9.249832363 | 4.46E-19 | 3.20E-18 | 32.09737315 |
| C20orf85 | 2.471320076  | 2.091297415 | 9.244513116  | 4.65E-19 | 3.33E-18 | 32.05460597 |
| CFAP52   | 1.049436428  | 0.721230942 | 9.235116394  | 5.02E-19 | 3.59E-18 | 31.97910001 |
| EPHX3    | -1.463189497 | 2.811935583 | -9.223089484 | 5.54E-19 | 3.94E-18 | 31.88254243 |
| MIF      | -1.143895387 | 5.148043088 | -9.214733043 | 5.93E-19 | 4.21E-18 | 31.8155079  |
| STOML3   | 1.060573019  | 0.64373254  | 9.206654934  | 6.33E-19 | 4.48E-18 | 31.7507489  |
| CPNE7    | -1.208389493 | 1.429687548 | -9.19449293  | 6.99E-19 | 4.93E-18 | 31.65333032 |
| FCGR3A   | 1.460006571  | 5.001396578 | 9.19372311   | 7.03E-19 | 4.96E-18 | 31.64716722 |
| ID3      | 1.104122243  | 4.567812635 | 9.188779967  | 7.32E-19 | 5.16E-18 | 31.60760202 |
| NRGN     | 1.862935716  | 3.937535406 | 9.182857615  | 7.68E-19 | 5.40E-18 | 31.56021996 |
| GJA1     | 1.490488593  | 4.926881445 | 9.170956041  | 8.45E-19 | 5.92E-18 | 31.46506942 |
| EPHB2    | -1.116488814 | 1.705605561 | -9.170402555 | 8.49E-19 | 5.94E-18 | 31.46064664 |
| GSDMB    | -1.116991797 | 2.208948492 | -9.162250457 | 9.07E-19 | 6.34E-18 | 31.39552817 |
| C2CD4A   | -1.573562884 | 1.721780563 | -9.152016563 | 9.85E-19 | 6.87E-18 | 31.31384137 |
| DSP      | -1.789416889 | 4.566149978 | -9.145160397 | 1.04E-18 | 7.25E-18 | 31.25915352 |
| EFCAB1   | 1.023840694  | 0.650067876 | 9.130737271  | 1.17E-18 | 8.11E-18 | 31.14420777 |
| SGCE     | 1.168795288  | 3.372614009 | 9.116211275  | 1.31E-18 | 9.10E-18 | 31.02857879 |
| MAP1LC3C | 1.150912293  | 1.34565265  | 9.112153302  | 1.36E-18 | 9.39E-18 | 30.99630126 |
| SRPX2    | -1.531665652 | 3.096601356 | -9.111789705 | 1.36E-18 | 9.42E-18 | 30.9934097  |
| SGMS2    | 1.035790552  | 3.309408709 | 9.107724731  | 1.41E-18 | 9.71E-18 | 30.96108819 |
| DEPTOR   | -1.20747595  | 3.225891123 | -9.103338868 | 1.46E-18 | 1.00E-17 | 30.92622729 |
| ATP13A4  | 1.716700809  | 2.42211963  | 9.092923395  | 1.59E-18 | 1.09E-17 | 30.84349042 |
| AOX1     | 1.069640657  | 1.294396977 | 9.04536142   | 2.32E-18 | 1.58E-17 | 30.46657451 |
| CD44     | 1.123583935  | 5.027394259 | 9.036041298  | 2.50E-18 | 1.70E-17 | 30.39288839 |
| LAPTM5   | 1.206115679  | 6.464235976 | 9.031976008  | 2.58E-18 | 1.75E-17 | 30.36076549 |
| SELENBP1 | 1.681174717  | 5.475719643 | 9.030582122  | 2.61E-18 | 1.77E-17 | 30.34975384 |
| ACY3     | -1.218538096 | 1.550037154 | -9.028524945 | 2.66E-18 | 1.80E-17 | 30.33350456 |
| FMO3     | 1.045815228  | 1.943972622 | 9.025383823  | 2.72E-18 | 1.85E-17 | 30.30869874 |
| EGLN3    | -1.654909126 | 2.507467908 | -9.014586022 | 2.97E-18 | 2.00E-17 | 30.22347655 |
| CYBB     | 1.485704059  | 4.485357858 | 9.010479289  | 3.07E-18 | 2.07E-17 | 30.19108404 |
| CLDN4    | -1.118649253 | 6.313973985 | -9.001236544 | 3.30E-18 | 2.22E-17 | 30.11822097 |
| MS4A4A   | 1.200791436  | 3.2055312   | 8.998087666  | 3.39E-18 | 2.28E-17 | 30.09341033 |
| OLFML2A  | 1.000567136  | 2.16881339  | 8.992742156  | 3.53E-18 | 2.37E-17 | 30.05130691 |
| COL11A1  | -1.997399573 | 1.924110771 | -8.989630546 | 3.62E-18 | 2.43E-17 | 30.02680727 |
| RAMP1    | -1.670105723 | 4.15471389  | -8.982487763 | 3.84E-18 | 2.57E-17 | 29.97059177 |
| PANX2    | -1.356821728 | 2.160213472 | -8.96878744  | 4.28E-18 | 2.86E-17 | 29.86286084 |
| MMP28    | 1.932802395  | 2.704966326 | 8.967905169  | 4.31E-18 | 2.87E-17 | 29.85592744 |
| RTN4RL2  | -1.499206768 | 2.173562702 | -8.967473085 | 4.32E-18 | 2.88E-17 | 29.85253206 |
| DYNLRB2  | 1.00822178   | 0.788654174 | 8.95796511   | 4.66E-18 | 3.10E-17 | 29.77784817 |
| PLAU     | -1.841908013 | 5.022285302 | -8.941825671 | 5.30E-18 | 3.52E-17 | 29.65121164 |
| EFNB2    | 1.15067676   | 3.526160681 | 8.93423937   | 5.63E-18 | 3.73E-17 | 29.59174593 |
| DNAJC22  | -1.110601759 | 1.230403104 | -8.930036929 | 5.82E-18 | 3.85E-17 | 29.55882122 |
| ITPKA    | -1.830745144 | 1.878309974 | -8.926731459 | 5.97E-18 | 3.95E-17 | 29.53293218 |
| DKK3     | 1.176459178  | 3.889653574 | 8.926239347  | 6.00E-18 | 3.97E-17 | 29.52907849 |
| SIGLEC1  | 1.143430643  | 2.23586021  | 8.917510234  | 6.43E-18 | 4.24E-17 | 29.46074812 |
| FA2H     | -1.438180595 | 2.54169293  | -8.912545395 | 6.68E-18 | 4.40E-17 | 29.42190651 |
| NMU      | -1.668438291 | 1.768751529 | -8.911158854 | 6.76E-18 | 4.44E-17 | 29.41106206 |
| NEIL3    | -1.004896291 | 1.017065497 | -8.901069809 | 7.32E-18 | 4.80E-17 | 29.33219169 |
| CCNO     | -1.36367935  | 2.171632428 | -8.899820222 | 7.39E-18 | 4.85E-17 | 29.32242783 |
| CSTA     | 1.271539658  | 2.566339461 | 8.88600877   | 8.25E-18 | 5.39E-17 | 29.2145788  |

|          |              |             |              |          |          |             |
|----------|--------------|-------------|--------------|----------|----------|-------------|
| THEM5    | -1.228575169 | 2.539955685 | -8.871259014 | 9.27E-18 | 6.03E-17 | 29.09954281 |
| C1orf194 | 1.445968593  | 1.215970372 | 8.867782339  | 9.52E-18 | 6.19E-17 | 29.07244867 |
| SLC29A4  | -1.439343534 | 1.912130908 | -8.829240307 | 1.29E-17 | 8.32E-17 | 28.77262551 |
| DEPP1    | 1.268325997  | 5.149966865 | 8.821283139  | 1.37E-17 | 8.84E-17 | 28.71084916 |
| C1orf189 | 1.212663557  | 0.960428938 | 8.81190623   | 1.48E-17 | 9.49E-17 | 28.63810481 |
| DRAM1    | 1.297487565  | 4.921118002 | 8.803706479  | 1.58E-17 | 1.01E-16 | 28.57454084 |
| DPT      | 1.551640726  | 3.493939407 | 8.79945366   | 1.63E-17 | 1.04E-16 | 28.54159097 |
| BTG2     | 1.335166376  | 5.636699615 | 8.799069253  | 1.64E-17 | 1.05E-16 | 28.53861327 |
| TOX3     | -1.490010726 | 2.138988933 | -8.796207285 | 1.67E-17 | 1.07E-16 | 28.51644695 |
| COL4A4   | 1.079700853  | 1.937719404 | 8.790315065  | 1.75E-17 | 1.12E-16 | 28.4708282  |
| IL4I1    | -1.311457228 | 2.536837856 | -8.788262222 | 1.78E-17 | 1.14E-16 | 28.45494014 |
| WFDC3    | -1.507908523 | 1.712980431 | -8.787729068 | 1.79E-17 | 1.14E-16 | 28.45081424 |
| ZMYND10  | 1.331036185  | 1.348594893 | 8.777476403  | 1.94E-17 | 1.23E-16 | 28.37150931 |
| SLC39A4  | -1.093861282 | 3.217182637 | -8.771832732 | 2.02E-17 | 1.29E-16 | 28.32788529 |
| NGEF     | -1.109970499 | 1.324159294 | -8.770536417 | 2.04E-17 | 1.30E-16 | 28.31786815 |
| GGTLC1   | 2.162010404  | 2.767097738 | 8.770060638  | 2.05E-17 | 1.30E-16 | 28.3141919  |
| CYB5A    | 1.182367719  | 4.058878417 | 8.767079004  | 2.10E-17 | 1.33E-16 | 28.29115688 |
| CAPSL    | 1.441550748  | 1.085000265 | 8.75889946   | 2.24E-17 | 1.42E-16 | 28.22799533 |
| SPINK1   | -3.437455397 | 3.946219601 | -8.750283983 | 2.40E-17 | 1.52E-16 | 28.16151619 |
| AXL      | 1.042597097  | 3.524833873 | 8.744677737  | 2.50E-17 | 1.58E-16 | 28.11828382 |
| ALDH1A1  | 1.828656636  | 4.707749317 | 8.732371209  | 2.76E-17 | 1.74E-16 | 28.02345666 |
| UGDH     | -1.361607913 | 4.757529271 | -8.729944829 | 2.81E-17 | 1.77E-16 | 28.00477238 |
| S100A4   | 1.51204431   | 7.064488053 | 8.728119818  | 2.85E-17 | 1.79E-16 | 27.99072154 |
| CARD11   | -1.259072592 | 2.587456414 | -8.725671672 | 2.90E-17 | 1.83E-16 | 27.97187668 |
| TFRC     | 1.142402327  | 4.201081733 | 8.724415966  | 2.93E-17 | 1.84E-16 | 27.96221233 |
| ENC1     | -1.031211593 | 3.861828139 | -8.721252459 | 3.01E-17 | 1.89E-16 | 27.93786957 |
| EMP3     | 1.033959724  | 4.522534614 | 8.718790317  | 3.06E-17 | 1.92E-16 | 27.91892839 |
| RSPH4A   | 1.191117738  | 1.052678855 | 8.715299526  | 3.15E-17 | 1.97E-16 | 27.89208085 |
| BHLHA15  | -1.290403289 | 1.741281806 | -8.696272384 | 3.65E-17 | 2.27E-16 | 27.74588846 |
| BARX2    | -1.308859855 | 1.435116645 | -8.693581106 | 3.73E-17 | 2.32E-16 | 27.72523014 |
| SPRY4    | 1.021261043  | 3.405485219 | 8.678808097  | 4.18E-17 | 2.59E-16 | 27.61191939 |
| LYPD1    | -1.138427776 | 1.20607163  | -8.677217594 | 4.23E-17 | 2.62E-16 | 27.59972885 |
| APOC1    | 1.56037921   | 6.01728666  | 8.677039041  | 4.24E-17 | 2.63E-16 | 27.59836042 |
| C4orf48  | -1.146638633 | 2.667140462 | -8.673868895 | 4.34E-17 | 2.69E-16 | 27.57406807 |
| CFTR     | 1.232056494  | 1.420429752 | 8.669348174  | 4.50E-17 | 2.78E-16 | 27.53943823 |
| KIFC2    | -1.100145336 | 2.135402184 | -8.660523487 | 4.82E-17 | 2.97E-16 | 27.47187885 |
| ANO9     | -1.121023144 | 2.506235394 | -8.660283824 | 4.83E-17 | 2.98E-16 | 27.47004479 |
| PRF1     | 1.217489715  | 2.703613401 | 8.65780731   | 4.92E-17 | 3.04E-16 | 27.45109516 |
| LIPA     | 1.040096902  | 4.936494224 | 8.657669525  | 4.93E-17 | 3.04E-16 | 27.45004099 |
| SNX30    | 1.049651705  | 2.767759378 | 8.656828794  | 4.96E-17 | 3.06E-16 | 27.44360896 |
| DSG2     | -1.160385824 | 4.69905906  | -8.653744521 | 5.08E-17 | 3.13E-16 | 27.42001679 |
| PXMP4    | 1.06693248   | 2.891152607 | 8.624216371  | 6.38E-17 | 3.91E-16 | 27.19447745 |
| BCL2A1   | 1.175529793  | 3.197736305 | 8.624188887  | 6.38E-17 | 3.91E-16 | 27.19426781 |
| WDR38    | 1.44233728   | 1.13380402  | 8.622584431  | 6.46E-17 | 3.95E-16 | 27.18202979 |
| ALOX15   | 1.449862334  | 1.101059221 | 8.609873799  | 7.13E-17 | 4.35E-16 | 27.08514117 |
| LCPI     | 1.204060141  | 5.276605616 | 8.592711567  | 8.14E-17 | 4.95E-16 | 26.95449419 |
| LGSN     | -1.496320368 | 1.537155796 | -8.591225744 | 8.23E-17 | 5.00E-16 | 26.94319285 |
| CFB      | -1.267214338 | 2.500242333 | -8.588991601 | 8.38E-17 | 5.09E-16 | 26.92620254 |
| NKD2     | 1.028631046  | 2.146010509 | 8.587555741  | 8.47E-17 | 5.14E-16 | 26.91528485 |
| POSTN    | -1.546142244 | 4.998573463 | -8.579825207 | 8.99E-17 | 5.45E-16 | 26.8565292  |
| STK32A   | -1.039939119 | 1.675057091 | -8.577299011 | 9.17E-17 | 5.56E-16 | 26.83733778 |
| ROPN1L   | 1.146089761  | 0.987959556 | 8.558913083  | 1.06E-16 | 6.38E-16 | 26.69779193 |
| FAM92B   | 1.293303552  | 1.116416002 | 8.550937222  | 1.12E-16 | 6.76E-16 | 26.63732849 |
| TBX15    | -1.243224936 | 1.374263168 | -8.54153007  | 1.21E-16 | 7.25E-16 | 26.56607069 |
| CITED2   | 1.127979318  | 5.452316997 | 8.514029367  | 1.49E-16 | 8.89E-16 | 26.3581048  |
| TMEM190  | 1.615251866  | 1.28687977  | 8.512246811  | 1.51E-16 | 9.00E-16 | 26.34464266 |

|          |              |             |              |          |          |             |
|----------|--------------|-------------|--------------|----------|----------|-------------|
| EFNB1    | 1.040631697  | 3.259269018 | 8.505810213  | 1.59E-16 | 9.44E-16 | 26.29605065 |
| PDGFRL   | -1.076138504 | 2.633540169 | -8.492418286 | 1.76E-16 | 1.04E-15 | 26.19504182 |
| MUC20    | -1.515724667 | 3.07102866  | -8.481855937 | 1.91E-16 | 1.13E-15 | 26.11546218 |
| E2F1     | -1.086259882 | 2.993572373 | -8.480040526 | 1.93E-16 | 1.14E-15 | 26.10179211 |
| EIF4EBP1 | -1.259064386 | 4.866731384 | -8.477356358 | 1.97E-16 | 1.16E-15 | 26.08158445 |
| NTM      | 1.099928951  | 1.608913305 | 8.474482104  | 2.02E-16 | 1.19E-15 | 26.05995124 |
| CEACAM5  | -3.287249477 | 5.291847641 | -8.471081489 | 2.07E-16 | 1.22E-15 | 26.03436369 |
| SRGN     | 1.238949897  | 6.747237205 | 8.469723158  | 2.09E-16 | 1.23E-15 | 26.02414531 |
| MMP17    | -1.0006824   | 1.285111297 | -8.466792834 | 2.14E-16 | 1.26E-15 | 26.00210556 |
| ERICH2   | 1.097398073  | 2.258815469 | 8.451480767  | 2.40E-16 | 1.41E-15 | 25.88703575 |
| ALPL     | 2.081743226  | 4.472069805 | 8.451411557  | 2.40E-16 | 1.41E-15 | 25.88651601 |
| SLC16A3  | -1.13122575  | 4.117969113 | -8.450466758 | 2.42E-16 | 1.42E-15 | 25.87942121 |
| RCN3     | -1.323308459 | 3.896887799 | -8.440130727 | 2.62E-16 | 1.53E-15 | 25.80184495 |
| PLAC8    | 1.369944001  | 2.160618172 | 8.437396183  | 2.67E-16 | 1.57E-15 | 25.7813334  |
| CD37     | 1.057248025  | 3.165838861 | 8.433017023  | 2.76E-16 | 1.61E-15 | 25.74849651 |
| CAMK2N1  | 1.396848372  | 3.600530982 | 8.429050082  | 2.85E-16 | 1.66E-15 | 25.71876208 |
| PLEKHA6  | -1.13731901  | 2.721676354 | -8.428624435 | 2.86E-16 | 1.67E-15 | 25.71557226 |
| MACROD2  | 1.146959258  | 1.248754299 | 8.40873792   | 3.32E-16 | 1.93E-15 | 25.56668176 |
| EEF1A2   | -2.720378176 | 2.881551127 | -8.408046291 | 3.34E-16 | 1.94E-15 | 25.56150846 |
| PER1     | 1.181171232  | 3.854805499 | 8.388085401  | 3.89E-16 | 2.24E-15 | 25.41234634 |
| PODNL1   | -1.243326861 | 1.705391269 | -8.37721129  | 4.22E-16 | 2.43E-15 | 25.33120355 |
| ENTPD8   | -1.062479148 | 1.050186111 | -8.365090939 | 4.62E-16 | 2.66E-15 | 25.24085814 |
| SLC2A3   | 1.197281094  | 3.2915233   | 8.363411953  | 4.68E-16 | 2.69E-15 | 25.22835099 |
| HES6     | -1.520122463 | 2.706345627 | -8.362491759 | 4.72E-16 | 2.70E-15 | 25.22149709 |
| NDN      | 1.015166177  | 3.165876909 | 8.359565054  | 4.82E-16 | 2.76E-15 | 25.19970196 |
| FOS      | 1.574830286  | 6.265473452 | 8.358596828  | 4.86E-16 | 2.78E-15 | 25.19249291 |
| CBX2     | -1.134661884 | 1.644302877 | -8.358208883 | 4.87E-16 | 2.79E-15 | 25.1896046  |
| ACTG2    | 1.19267233   | 2.208569362 | 8.355721456  | 4.96E-16 | 2.84E-15 | 25.17108781 |
| ESPN     | -1.242443173 | 1.803566586 | -8.34862221  | 5.24E-16 | 2.99E-15 | 25.11826361 |
| COMP     | -1.911654673 | 2.840356696 | -8.346771346 | 5.31E-16 | 3.03E-15 | 25.10449744 |
| FKBP10   | -1.403236622 | 4.487941935 | -8.343735003 | 5.43E-16 | 3.10E-15 | 25.0819192  |
| PLBD1    | 1.239073326  | 3.864329844 | 8.343368783  | 5.45E-16 | 3.11E-15 | 25.07919642 |
| SCNN1G   | 1.317657862  | 2.077920871 | 8.338302223  | 5.66E-16 | 3.22E-15 | 25.04153709 |
| SOD3     | 1.221286156  | 4.089920376 | 8.315795269  | 6.71E-16 | 3.80E-15 | 24.87446122 |
| B4GALNT4 | -1.392294331 | 1.403111809 | -8.310374247 | 6.98E-16 | 3.95E-15 | 24.83427221 |
| ARNTL2   | -1.237219673 | 2.02510678  | -8.271667529 | 9.34E-16 | 5.24E-15 | 24.54791558 |
| C5orf38  | 1.445198858  | 2.043486885 | 8.265046801  | 9.81E-16 | 5.50E-15 | 24.49903983 |
| SLPI     | 2.249885165  | 8.266410291 | 8.263605901  | 9.92E-16 | 5.56E-15 | 24.48840684 |
| ADGRF5   | 1.606211307  | 4.772366388 | 8.258848212  | 1.03E-15 | 5.75E-15 | 24.45330828 |
| SLC6A8   | -1.199622435 | 2.655553346 | -8.244889292 | 1.14E-15 | 6.36E-15 | 24.35042186 |
| LRRC4    | 1.040624281  | 1.529206416 | 8.240879183  | 1.18E-15 | 6.55E-15 | 24.32089003 |
| MFAP2    | -1.172101811 | 3.039650406 | -8.23800369  | 1.20E-15 | 6.68E-15 | 24.29972088 |
| BEX5     | 1.086901416  | 1.853524803 | 8.234500596  | 1.23E-15 | 6.85E-15 | 24.27393922 |
| ASPHD1   | -1.339461923 | 1.935125234 | -8.226304534 | 1.31E-15 | 7.27E-15 | 24.21365255 |
| HCST     | 1.018416778  | 3.279601675 | 8.220126615  | 1.37E-15 | 7.61E-15 | 24.16824173 |
| BEX4     | 1.041470364  | 4.314909424 | 8.207656669  | 1.51E-15 | 8.33E-15 | 24.07666322 |
| REEP6    | -1.379364223 | 2.678928866 | -8.191262922 | 1.70E-15 | 9.37E-15 | 23.95643541 |
| SCG5     | -1.423780385 | 1.955579346 | -8.182301506 | 1.82E-15 | 9.99E-15 | 23.89079473 |
| SPATA18  | 1.148021187  | 1.533490694 | 8.163304055  | 2.09E-15 | 1.14E-14 | 23.75182969 |
| AKAP12   | 1.364937947  | 2.335599024 | 8.161325223  | 2.13E-15 | 1.16E-14 | 23.73736936 |
| CABYR    | -1.379584376 | 1.434095855 | -8.137324242 | 2.54E-15 | 1.38E-14 | 23.56220275 |
| CENPW    | -1.076333609 | 2.94695934  | -8.133609544 | 2.61E-15 | 1.41E-14 | 23.53512821 |
| CLDN3    | -1.631637625 | 5.556536297 | -8.120136647 | 2.88E-15 | 1.55E-14 | 23.43701335 |
| CSF3R    | 1.338291839  | 2.679424012 | 8.095324902  | 3.46E-15 | 1.86E-14 | 23.25666203 |
| TMEM63C  | -1.090041742 | 1.132508749 | -8.087965746 | 3.65E-15 | 1.96E-14 | 23.20325411 |
| STRA6    | -1.119339273 | 1.126321956 | -8.080885297 | 3.85E-15 | 2.06E-14 | 23.15190525 |

|          |              |             |              |          |          |             |
|----------|--------------|-------------|--------------|----------|----------|-------------|
| SGPP2    | -1.280489398 | 4.232414514 | -8.05934559  | 4.51E-15 | 2.40E-14 | 22.99591468 |
| PLOD2    | -1.327557792 | 3.454314542 | -8.053059283 | 4.72E-15 | 2.51E-14 | 22.95045164 |
| HIST1H3H | -1.14418221  | 1.670283533 | -8.048641853 | 4.88E-15 | 2.59E-14 | 22.91852135 |
| FAM166B  | 1.114278007  | 1.142591131 | 8.030288336  | 5.58E-15 | 2.95E-14 | 22.7860069  |
| CD163    | 1.319188746  | 3.87504243  | 8.013767055  | 6.30E-15 | 3.31E-14 | 22.66692753 |
| NFE2L3   | -1.018216159 | 3.23978098  | -8.005618352 | 6.69E-15 | 3.51E-14 | 22.60826667 |
| CNTD2    | -1.091628991 | 1.118574163 | -8.003390021 | 6.80E-15 | 3.56E-14 | 22.59223365 |
| CA9      | -2.051286    | 2.0869596   | -7.99672876  | 7.14E-15 | 3.73E-14 | 22.54432659 |
| CPD      | -1.065050825 | 4.41446006  | -7.982405284 | 7.92E-15 | 4.13E-14 | 22.44142159 |
| PRSS22   | -1.213505363 | 3.295695827 | -7.982198269 | 7.93E-15 | 4.13E-14 | 22.4399354  |
| LYZ      | 1.758096469  | 7.551724291 | 7.976567321  | 8.27E-15 | 4.30E-14 | 22.39952183 |
| CFAP73   | 1.058410205  | 0.951081044 | 7.974486725  | 8.39E-15 | 4.36E-14 | 22.38459507 |
| GLB1L2   | -1.024568452 | 2.38995043  | -7.967507901 | 8.83E-15 | 4.58E-14 | 22.33454981 |
| FAXDC2   | 1.257666709  | 2.564386414 | 7.956017546  | 9.60E-15 | 4.98E-14 | 22.25222861 |
| IGLL5    | -1.895818758 | 4.739618387 | -7.954879301 | 9.68E-15 | 5.01E-14 | 22.24407898 |
| CD53     | 1.072338591  | 4.98001285  | 7.947949391  | 1.02E-14 | 5.26E-14 | 22.19448214 |
| HSD17B13 | 1.01303474   | 0.744429458 | 7.920209618  | 1.24E-14 | 6.39E-14 | 21.99629735 |
| XKRX     | -1.297417706 | 1.861064192 | -7.911641862 | 1.32E-14 | 6.79E-14 | 21.93519788 |
| CAPN5    | -1.193683541 | 2.766962585 | -7.875179343 | 1.72E-14 | 8.75E-14 | 21.67576543 |
| CXCL3    | 1.111776798  | 1.742048484 | 7.870159918  | 1.79E-14 | 9.07E-14 | 21.64012739 |
| TMEM156  | -1.020777329 | 1.439497509 | -7.866703539 | 1.83E-14 | 9.29E-14 | 21.61559763 |
| MELTF    | -1.104189811 | 1.501199536 | -7.861989579 | 1.90E-14 | 9.59E-14 | 21.58215684 |
| BAIAP2L2 | -1.183873043 | 1.371841503 | -7.855187835 | 1.99E-14 | 1.01E-13 | 21.53393374 |
| ADA2     | 1.016436978  | 3.997241244 | 7.852980679  | 2.02E-14 | 1.02E-13 | 21.51829263 |
| DDIT4L   | -1.263823384 | 1.604153824 | -7.830049248 | 2.39E-14 | 1.20E-13 | 21.35599742 |
| CD69     | 1.026546169  | 2.162295344 | 7.826673321  | 2.44E-14 | 1.23E-13 | 21.33213687 |
| JSRP1    | -1.119849578 | 1.41360937  | -7.826043367 | 2.46E-14 | 1.23E-13 | 21.32768537 |
| HLA-DOA  | 1.276993273  | 3.92652492  | 7.818679834  | 2.59E-14 | 1.30E-13 | 21.27567317 |
| S100P    | -2.980312971 | 5.030169511 | -7.796241655 | 3.04E-14 | 1.52E-13 | 21.11742494 |
| CACHD1   | 1.075990089  | 1.983668354 | 7.789738286  | 3.18E-14 | 1.59E-13 | 21.07162768 |
| OASL     | 1.02296487   | 2.14068229  | 7.776100166  | 3.51E-14 | 1.74E-13 | 20.97568715 |
| TRIM2    | -1.042816916 | 3.404482782 | -7.775364767 | 3.53E-14 | 1.75E-13 | 20.97051768 |
| TGFB2    | 1.027039143  | 1.747691376 | 7.772363284  | 3.61E-14 | 1.79E-13 | 20.9494229  |
| LRRC46   | 1.103976968  | 1.386640525 | 7.750682231  | 4.21E-14 | 2.08E-13 | 20.7972415  |
| ALDH3B2  | -1.225748905 | 1.696575934 | -7.748037088 | 4.29E-14 | 2.11E-13 | 20.77869852 |
| HSF4     | -1.075873889 | 1.96793388  | -7.745500024 | 4.37E-14 | 2.15E-13 | 20.76091802 |
| HIST1H4H | -1.221035234 | 2.446086098 | -7.727356823 | 4.97E-14 | 2.43E-13 | 20.63390246 |
| AOC1     | -1.943943317 | 2.144360216 | -7.721861114 | 5.17E-14 | 2.53E-13 | 20.59547613 |
| MZB1     | -1.619422682 | 3.515248781 | -7.719005548 | 5.27E-14 | 2.58E-13 | 20.57551859 |
| SFN      | -1.255605896 | 6.636598455 | -7.701246675 | 5.98E-14 | 2.91E-13 | 20.45153627 |
| C1QC     | 1.294026567  | 6.987472136 | 7.684963197  | 6.71E-14 | 3.25E-13 | 20.33805799 |
| MMP13    | -1.867035446 | 1.859431965 | -7.684938866 | 6.71E-14 | 3.25E-13 | 20.33788858 |
| RAB15    | -1.056997579 | 3.469516102 | -7.679555198 | 6.97E-14 | 3.37E-13 | 20.30041322 |
| SYT12    | -1.279267073 | 1.221780941 | -7.671840414 | 7.37E-14 | 3.56E-13 | 20.24674831 |
| CGREF1   | -1.000909164 | 1.037149023 | -7.670670599 | 7.43E-14 | 3.58E-13 | 20.23861477 |
| ATP6V1C2 | -1.096301633 | 1.473176644 | -7.669821712 | 7.47E-14 | 3.60E-13 | 20.23271322 |
| LYPD3    | -1.476468825 | 2.051859618 | -7.658140002 | 8.11E-14 | 3.90E-13 | 20.15155477 |
| LAMA3    | 1.368636394  | 2.49290419  | 7.642572738  | 9.06E-14 | 4.35E-13 | 20.04355792 |
| BATF     | -1.007635672 | 3.561559054 | -7.638578313 | 9.31E-14 | 4.46E-13 | 20.01587569 |
| APOBEC3B | -1.154760457 | 1.928926886 | -7.633387001 | 9.66E-14 | 4.62E-13 | 19.9799164  |
| IFT57    | 1.062829618  | 4.428463761 | 7.612244653  | 1.12E-13 | 5.35E-13 | 19.83367288 |
| LOXL2    | -1.168872977 | 2.911744102 | -7.607341356 | 1.16E-13 | 5.53E-13 | 19.79980356 |
| TXNIP    | 1.015439937  | 7.506342358 | 7.547742353  | 1.76E-13 | 8.29E-13 | 19.38955109 |
| NOXA1    | -1.018754132 | 2.951814211 | -7.543948823 | 1.81E-13 | 8.51E-13 | 19.36352745 |
| ADGRF4   | -1.015755231 | 1.021380967 | -7.529889613 | 1.99E-13 | 9.35E-13 | 19.2671746  |
| SLC7A11  | -1.310107229 | 1.7125276   | -7.516217054 | 2.19E-13 | 1.02E-12 | 19.17361281 |



|           |              |             |              |          |          |             |
|-----------|--------------|-------------|--------------|----------|----------|-------------|
| AGR2      | -1.784630135 | 6.723592748 | -7.51529002  | 2.21E-13 | 1.03E-12 | 19.16727412 |
| B3GNT6    | -1.687929038 | 1.653499856 | -7.495907829 | 2.53E-13 | 1.17E-12 | 19.03489341 |
| MT1A      | 1.376378496  | 1.61381914  | 7.486635999  | 2.69E-13 | 1.25E-12 | 18.97166581 |
| PLA1A     | 1.062841972  | 2.016154059 | 7.477753581  | 2.86E-13 | 1.33E-12 | 18.9111154  |
| SCD       | 1.055545164  | 6.151535467 | 7.470730795  | 3.01E-13 | 1.39E-12 | 18.86335276 |
| CTSH      | 1.331506545  | 6.11243132  | 7.467253548  | 3.08E-13 | 1.42E-12 | 18.83969822 |
| MYEOV     | -1.549017745 | 1.486051326 | -7.466314609 | 3.10E-13 | 1.43E-12 | 18.83331248 |
| RARRES2   | 1.122654802  | 5.127676907 | 7.457929376  | 3.29E-13 | 1.52E-12 | 18.77631368 |
| FNDC4     | -1.132790371 | 2.377696337 | -7.455996024 | 3.33E-13 | 1.53E-12 | 18.76317915 |
| HLA-DRA   | 1.264630963  | 9.958801052 | 7.45220248   | 3.42E-13 | 1.57E-12 | 18.73741525 |
| SHE       | 1.081785056  | 1.937969697 | 7.445380603  | 3.58E-13 | 1.65E-12 | 18.69111151 |
| DMBT1     | 2.144420164  | 3.209123404 | 7.444438148  | 3.61E-13 | 1.66E-12 | 18.68471731 |
| TMPRSS11E | -1.656152252 | 1.567248864 | -7.424264945 | 4.15E-13 | 1.89E-12 | 18.54800943 |
| SOCS3     | 1.053802905  | 5.73047037  | 7.420668921  | 4.25E-13 | 1.94E-12 | 18.52367231 |
| HLA-DPA1  | 1.268098807  | 6.306606271 | 7.416357962  | 4.38E-13 | 2.00E-12 | 18.49450947 |
| SEZ6L2    | -1.292494233 | 4.124703644 | -7.412211002 | 4.50E-13 | 2.05E-12 | 18.46646922 |
| PTK6      | -1.132424244 | 3.00660826  | -7.402678363 | 4.81E-13 | 2.19E-12 | 18.40206196 |
| HILPDA    | -1.103596655 | 3.272558292 | -7.398445666 | 4.95E-13 | 2.25E-12 | 18.37348566 |
| MS4A8     | 1.460397766  | 1.367175284 | 7.374603643  | 5.83E-13 | 2.63E-12 | 18.21277242 |
| CD79A     | -1.563461609 | 3.600342303 | -7.342016679 | 7.29E-13 | 3.27E-12 | 17.99380482 |
| VCAN      | -1.211207696 | 3.580864852 | -7.327071414 | 8.07E-13 | 3.61E-12 | 17.89364861 |
| MAP7D2    | -1.062865719 | 1.233220987 | -7.323198537 | 8.29E-13 | 3.70E-12 | 17.86772195 |
| C2        | 1.134044409  | 3.741194907 | 7.321696062  | 8.37E-13 | 3.74E-12 | 17.85766668 |
| VMO1      | 1.016445053  | 2.571368792 | 7.31231819   | 8.92E-13 | 3.97E-12 | 17.79494509 |
| S100A2    | -1.727928427 | 3.200099944 | -7.311350883 | 8.98E-13 | 4.00E-12 | 17.78847927 |
| HIST1H2BK | -1.052723158 | 5.862807149 | -7.310362922 | 9.04E-13 | 4.02E-12 | 17.78187612 |
| MUC3A     | -1.487174268 | 1.625691541 | -7.307897349 | 9.20E-13 | 4.08E-12 | 17.76540041 |
| FOXA3     | -1.236235968 | 1.576579948 | -7.304406977 | 9.42E-13 | 4.18E-12 | 17.74208456 |
| CDHR3     | 1.107894205  | 1.122995672 | 7.303257082  | 9.49E-13 | 4.21E-12 | 17.73440523 |
| PMAIP1    | -1.135057658 | 2.884584367 | -7.286717763 | 1.06E-12 | 4.69E-12 | 17.62406177 |
| PRSS12    | 1.095264036  | 1.53046453  | 7.282908703  | 1.09E-12 | 4.81E-12 | 17.5986787  |
| FOXA1     | -1.101581884 | 3.984070461 | -7.274756876 | 1.15E-12 | 5.06E-12 | 17.54439301 |
| COL17A1   | -1.717093629 | 2.028108946 | -7.269077735 | 1.20E-12 | 5.26E-12 | 17.50660358 |
| HIST1H2BC | -1.184474916 | 2.581367513 | -7.267303291 | 1.21E-12 | 5.32E-12 | 17.49480131 |
| MGP       | 1.178888008  | 6.070119649 | 7.251165797  | 1.35E-12 | 5.90E-12 | 17.38757675 |
| GALNT6    | -1.171029207 | 2.933034247 | -7.246706605 | 1.39E-12 | 6.07E-12 | 17.35798285 |
| HLA-DRB5  | 1.542953919  | 7.458446326 | 7.229255693  | 1.57E-12 | 6.80E-12 | 17.24231358 |
| FAM183A   | 1.291493235  | 1.759175927 | 7.216145716  | 1.71E-12 | 7.40E-12 | 17.15556981 |
| FNDC1     | -1.215726944 | 2.068035486 | -7.200204724 | 1.91E-12 | 8.21E-12 | 17.05027092 |
| RSPH1     | 1.116036899  | 1.572138945 | 7.174362236  | 2.27E-12 | 9.72E-12 | 16.87997968 |
| C5orf49   | 1.066319773  | 1.396428644 | 7.16780001   | 2.37E-12 | 1.01E-11 | 16.83681865 |
| PTN       | 1.213392307  | 2.212038646 | 7.16052481   | 2.49E-12 | 1.06E-11 | 16.78900678 |
| MAOA      | 1.218015446  | 4.335704209 | 7.160071779  | 2.49E-12 | 1.07E-11 | 16.78603085 |
| IRX2      | 1.603011219  | 2.753702311 | 7.150816262  | 2.65E-12 | 1.13E-11 | 16.72526636 |
| HTR3A     | -1.207014786 | 1.15010292  | -7.132601798 | 3.00E-12 | 1.27E-11 | 16.60587621 |
| COL1A2    | -1.277481878 | 6.801417864 | -7.121606575 | 3.22E-12 | 1.36E-11 | 16.53392916 |
| HLA-DRB1  | 1.259714279  | 9.082676101 | 7.116668727  | 3.33E-12 | 1.41E-11 | 16.50164865 |
| AIM2      | -1.251255623 | 1.856765101 | -7.114569583 | 3.38E-12 | 1.42E-11 | 16.48793146 |
| PTPN13    | 1.203933738  | 2.756235615 | 7.109918543  | 3.48E-12 | 1.47E-11 | 16.45755056 |
| AKR7A3    | -1.49279104  | 1.585097398 | -7.104743061 | 3.61E-12 | 1.52E-11 | 16.42376351 |
| ADAMDEC1  | -1.216444996 | 1.899523682 | -7.099255617 | 3.74E-12 | 1.57E-11 | 16.38796239 |
| CDKN2A    | -1.395128235 | 1.815877743 | -7.093487761 | 3.89E-12 | 1.63E-11 | 16.35035678 |
| LRRN4     | 1.47786185   | 2.432122913 | 7.093029448  | 3.90E-12 | 1.64E-11 | 16.34736974 |
| KCNK1     | -1.044782679 | 3.276468272 | -7.081402099 | 4.21E-12 | 1.76E-11 | 16.27164301 |
| HLA-DPB1  | 1.154624988  | 7.043851746 | 7.078104425  | 4.31E-12 | 1.80E-11 | 16.25018484 |
| AHNAK2    | -1.185960143 | 2.165396979 | -7.077996646 | 4.31E-12 | 1.80E-11 | 16.24948365 |

|            |              |             |              |          |          |             |
|------------|--------------|-------------|--------------|----------|----------|-------------|
| NKG7       | 1.182901207  | 3.394332521 | 7.048190434  | 5.25E-12 | 2.18E-11 | 16.05591561 |
| SPNS2      | 1.08988681   | 2.859452593 | 7.00893832   | 6.80E-12 | 2.81E-11 | 15.8020507  |
| HIST1H2BG  | -1.156684908 | 1.350210078 | -7.00816898  | 6.83E-12 | 2.82E-11 | 15.79708687 |
| MXRA5      | -1.156041604 | 3.297239004 | -7.002812359 | 7.08E-12 | 2.92E-11 | 15.76253831 |
| ALDH3B1    | 1.073901102  | 4.053013257 | 6.995519157  | 7.43E-12 | 3.06E-11 | 15.71553514 |
| COL7A1     | -1.002711455 | 1.244832095 | -6.976145747 | 8.43E-12 | 3.46E-11 | 15.59087784 |
| FCER1A     | 1.288582742  | 2.036843171 | 6.954336869  | 9.73E-12 | 3.97E-11 | 15.45089826 |
| ID1        | 1.254952124  | 5.169348827 | 6.9384474    | 1.08E-11 | 4.39E-11 | 15.34914503 |
| LCN2       | -1.930803231 | 5.459666504 | -6.920444596 | 1.21E-11 | 4.91E-11 | 15.23409587 |
| BMP5       | 1.027741103  | 2.01713281  | 6.860905406  | 1.79E-11 | 7.15E-11 | 14.85540414 |
| CEBPA      | 1.037766457  | 3.053806196 | 6.849533231  | 1.92E-11 | 7.67E-11 | 14.78338804 |
| ATP1B1     | -1.001628816 | 7.314059826 | -6.846619856 | 1.96E-11 | 7.80E-11 | 14.76495492 |
| XAGE2      | 1.358794081  | 1.110188616 | 6.846187813  | 1.96E-11 | 7.82E-11 | 14.76222193 |
| GPR87      | -1.529225275 | 1.724315421 | -6.82661614  | 2.23E-11 | 8.83E-11 | 14.63856976 |
| C4BPA      | 2.013555013  | 5.413328962 | 6.805415161  | 2.55E-11 | 1.01E-10 | 14.50496289 |
| CXCL14     | -2.196128433 | 3.946928016 | -6.801935595 | 2.61E-11 | 1.03E-10 | 14.48306867 |
| KRT15      | -1.296429477 | 2.192107519 | -6.793333359 | 2.76E-11 | 1.08E-10 | 14.42898229 |
| BASP1      | -1.213128042 | 4.668611202 | -6.789793877 | 2.82E-11 | 1.11E-10 | 14.40674476 |
| ST6GALNAC1 | -1.419153837 | 3.652576821 | -6.781959606 | 2.97E-11 | 1.16E-10 | 14.35755939 |
| PGC        | 3.16908021   | 4.821031022 | 6.776239359  | 3.08E-11 | 1.20E-10 | 14.32167687 |
| SLC16A9    | -1.304672459 | 1.85305115  | -6.756831459 | 3.49E-11 | 1.35E-10 | 14.20012513 |
| SPAG6      | 1.042794463  | 1.094725802 | 6.754702831  | 3.53E-11 | 1.37E-10 | 14.18681159 |
| HIST1H2AE  | -1.18440875  | 1.455402611 | -6.720520768 | 4.39E-11 | 1.69E-10 | 13.97350903 |
| KCNK5      | -1.092703542 | 3.700919526 | -6.716712507 | 4.50E-11 | 1.73E-10 | 13.9498019  |
| TESC       | -1.914582905 | 3.820676263 | -6.710834291 | 4.67E-11 | 1.80E-10 | 13.91323142 |
| SCGB3A2    | 2.704210374  | 5.998479355 | 6.705715732  | 4.83E-11 | 1.85E-10 | 13.8814093  |
| CT83       | -1.720581646 | 1.636830492 | -6.678663474 | 5.73E-11 | 2.19E-10 | 13.71356966 |
| SMKR1      | -1.081232594 | 1.567157123 | -6.647676092 | 6.97E-11 | 2.64E-10 | 13.52202833 |
| LDLRAD1    | 1.13045002   | 1.467121306 | 6.642881312  | 7.18E-11 | 2.72E-10 | 13.49245861 |
| QPCT       | -1.476052171 | 3.148090683 | -6.631575539 | 7.71E-11 | 2.92E-10 | 13.42280751 |
| RRAD       | 1.354564485  | 3.520643781 | 6.629263796  | 7.83E-11 | 2.96E-10 | 13.40857815 |
| RHOBTB2    | 1.009528866  | 3.949931005 | 6.599469007  | 9.44E-11 | 3.55E-10 | 13.22556437 |
| PRRX2      | -1.049022853 | 1.807011923 | -6.585789746 | 1.03E-10 | 3.85E-10 | 13.14177673 |
| HGD        | -1.46123898  | 1.945330291 | -6.554626827 | 1.25E-10 | 4.64E-10 | 12.95145656 |
| COL6A3     | -1.019395218 | 4.794610397 | -6.535761161 | 1.40E-10 | 5.19E-10 | 12.83661611 |
| PRAME      | -1.561868945 | 1.444250396 | -6.531614549 | 1.44E-10 | 5.33E-10 | 12.81141274 |
| S100A8     | 1.51213427   | 4.026172064 | 6.525291534  | 1.50E-10 | 5.53E-10 | 12.77300754 |
| CACNG4     | 1.304546384  | 1.960411503 | 6.502155495  | 1.73E-10 | 6.35E-10 | 12.63275525 |
| LRRC15     | -1.137086129 | 1.83378591  | -6.499048312 | 1.76E-10 | 6.47E-10 | 12.61395199 |
| PLA2G4A    | -1.349088867 | 3.408730483 | -6.481945964 | 1.96E-10 | 7.17E-10 | 12.51059503 |
| PCP4       | -1.756952617 | 1.944075738 | -6.469916229 | 2.11E-10 | 7.71E-10 | 12.43803484 |
| CST2       | -1.041242401 | 1.472362257 | -6.465576692 | 2.17E-10 | 7.91E-10 | 12.41188845 |
| AC007906.2 | 1.387497822  | 1.988674247 | 6.465375773  | 2.17E-10 | 7.92E-10 | 12.41067825 |
| MAB21L4    | 1.095104722  | 2.516109347 | 6.437567108  | 2.58E-10 | 9.34E-10 | 12.24349087 |
| TNS4       | -1.422061046 | 1.816732103 | -6.428348501 | 2.73E-10 | 9.86E-10 | 12.18820551 |
| HOXB7      | -1.137614477 | 2.402318107 | -6.421569054 | 2.84E-10 | 1.03E-09 | 12.14759187 |
| MUC4       | -1.266982414 | 2.129933075 | -6.418914537 | 2.89E-10 | 1.04E-09 | 12.13169955 |
| IER3       | -1.013970653 | 5.593316371 | -6.410938779 | 3.03E-10 | 1.09E-09 | 12.08398372 |
| CX3CL1     | 1.237908455  | 3.67729877  | 6.402592225  | 3.19E-10 | 1.15E-09 | 12.03410455 |
| GPX2       | -2.514161871 | 3.223178207 | -6.39944245  | 3.25E-10 | 1.17E-09 | 12.01529605 |
| WFDC2      | -1.380749352 | 7.354064111 | -6.396621369 | 3.31E-10 | 1.19E-09 | 11.99845711 |
| CLDN10     | -1.418396859 | 1.671836793 | -6.386653673 | 3.52E-10 | 1.26E-09 | 11.93901176 |
| MT-ND6     | 1.129307065  | 10.39441835 | 6.384204926  | 3.57E-10 | 1.28E-09 | 11.92442022 |
| TRIM31     | -1.004782464 | 1.13545737  | -6.38162177  | 3.63E-10 | 1.30E-09 | 11.90903301 |
| UCHL1      | -1.790201525 | 3.201559697 | -6.373436242 | 3.81E-10 | 1.36E-09 | 11.86030954 |
| HIST1H1C   | -1.097535712 | 5.766138082 | -6.355556626 | 4.25E-10 | 1.51E-09 | 11.75407165 |

|          |              |             |              |          |          |             |
|----------|--------------|-------------|--------------|----------|----------|-------------|
| DUSP4    | -1.295746712 | 3.014797485 | -6.353473616 | 4.30E-10 | 1.53E-09 | 11.74171157 |
| KRT16    | -1.303258895 | 1.364246837 | -6.339280229 | 4.69E-10 | 1.66E-09 | 11.65758502 |
| CEMIP    | -1.134966323 | 2.555452797 | -6.326680454 | 5.06E-10 | 1.79E-09 | 11.58304097 |
| FOLR1    | 1.707505401  | 5.710771403 | 6.319856819  | 5.28E-10 | 1.86E-09 | 11.54272407 |
| SCGB3A1  | 2.577286325  | 5.663899543 | 6.318057017  | 5.34E-10 | 1.88E-09 | 11.53209639 |
| COL9A2   | -1.06894202  | 2.408896286 | -6.279778974 | 6.72E-10 | 2.35E-09 | 11.3066911  |
| MUC21    | -1.810030324 | 2.934333856 | -6.229025121 | 9.11E-10 | 3.16E-09 | 11.00966031 |
| ROS1     | 1.22229078   | 2.94852946  | 6.228088716  | 9.16E-10 | 3.18E-09 | 11.00419986 |
| SLC16A14 | -1.242237126 | 2.057976052 | -6.21812377  | 9.72E-10 | 3.36E-09 | 10.94613574 |
| PAEP     | -2.28810612  | 2.355393898 | -6.215158604 | 9.90E-10 | 3.42E-09 | 10.92887387 |
| ITGB4    | -1.190469545 | 4.51104278  | -6.209572828 | 1.02E-09 | 3.54E-09 | 10.8963755  |
| RNASE1   | 1.213885323  | 8.035512453 | 6.207597229  | 1.04E-09 | 3.58E-09 | 10.88488746 |
| TREM1    | 1.176763724  | 3.430376673 | 6.202621072  | 1.07E-09 | 3.68E-09 | 10.85596542 |
| CIT      | -1.149724765 | 2.746352811 | -6.188456949 | 1.16E-09 | 3.99E-09 | 10.77375273 |
| SCNN1B   | 1.219794757  | 3.629034713 | 6.185765061  | 1.18E-09 | 4.05E-09 | 10.7581468  |
| PGGHG    | -1.335870686 | 3.983597945 | -6.176518447 | 1.25E-09 | 4.27E-09 | 10.70458579 |
| HIST3H2A | -1.255669264 | 2.528509785 | -6.168611013 | 1.31E-09 | 4.46E-09 | 10.65883756 |
| SFTPB    | 2.258564658  | 9.815290369 | 6.162501015  | 1.35E-09 | 4.62E-09 | 10.62352346 |
| HLA-DQA1 | 1.107032665  | 5.027997685 | 6.153961109  | 1.42E-09 | 4.85E-09 | 10.57421647 |
| CD24     | -1.162621912 | 5.975198508 | -6.14257395  | 1.52E-09 | 5.17E-09 | 10.50856338 |
| CILP     | -1.023025705 | 1.542021561 | -6.128263514 | 1.66E-09 | 5.61E-09 | 10.42620707 |
| HHIPL2   | -1.097597871 | 1.04617209  | -6.127295206 | 1.67E-09 | 5.64E-09 | 10.42064056 |
| GCLC     | -1.174741161 | 2.938206817 | -6.126557254 | 1.67E-09 | 5.66E-09 | 10.41639881 |
| MUC13    | -1.84099206  | 1.955785507 | -6.092920798 | 2.04E-09 | 6.85E-09 | 10.22353201 |
| RNF128   | 1.161638841  | 2.634073826 | 6.091972798  | 2.05E-09 | 6.89E-09 | 10.21810981 |
| SIX2     | -1.000455723 | 1.244376116 | -5.972511202 | 4.11E-09 | 1.34E-08 | 9.540775394 |
| FGL1     | -1.738119833 | 1.681771785 | -5.965230736 | 4.29E-09 | 1.40E-08 | 9.499878058 |
| HORMAD1  | -1.025056035 | 1.072409266 | -5.949753405 | 4.69E-09 | 1.52E-08 | 9.413081892 |
| MUC15    | 1.131147823  | 2.255948196 | 5.946893303  | 4.76E-09 | 1.55E-08 | 9.397064365 |
| GJB3     | -1.183116629 | 1.657872289 | -5.941636756 | 4.91E-09 | 1.60E-08 | 9.367643689 |
| PFN2     | -1.053990462 | 4.275997825 | -5.930210763 | 5.24E-09 | 1.70E-08 | 9.303772146 |
| TNNT1    | -1.438485506 | 2.245554834 | -5.915171046 | 5.71E-09 | 1.85E-08 | 9.219865473 |
| PPP1R14C | 1.054770264  | 2.856688472 | 5.896873308  | 6.35E-09 | 2.04E-08 | 9.118036395 |
| ACHE     | -1.037226943 | 1.775391427 | -5.879816694 | 6.99E-09 | 2.25E-08 | 9.023365783 |
| TMEM59L  | -1.414887842 | 1.771037071 | -5.837460361 | 8.90E-09 | 2.83E-08 | 8.789323274 |
| ISG15    | -1.08662804  | 5.956584338 | -5.833418996 | 9.10E-09 | 2.89E-08 | 8.767070882 |
| NT5E     | -1.132256748 | 3.390808914 | -5.825192834 | 9.53E-09 | 3.02E-08 | 8.721818586 |
| BARX1    | -1.534894381 | 1.438220198 | -5.822399455 | 9.69E-09 | 3.07E-08 | 8.706465036 |
| VSTM2L   | -1.401415107 | 4.29752174  | -5.815444966 | 1.01E-08 | 3.18E-08 | 8.668268737 |
| MUC5B    | -1.957713496 | 2.954107759 | -5.807881276 | 1.05E-08 | 3.32E-08 | 8.626772527 |
| KLK10    | 1.194309728  | 1.767783748 | 5.806442481  | 1.06E-08 | 3.34E-08 | 8.618884387 |
| LY6K     | -1.000037584 | 1.152648691 | -5.790267507 | 1.16E-08 | 3.64E-08 | 8.530325153 |
| SLC22A3  | 1.064918587  | 2.997786392 | 5.785742306  | 1.19E-08 | 3.73E-08 | 8.505588638 |
| IL37     | -1.511505199 | 1.528840214 | -5.774160656 | 1.27E-08 | 3.97E-08 | 8.44235714  |
| BMP6     | 1.04550887   | 1.832092719 | 5.770038591  | 1.30E-08 | 4.06E-08 | 8.419879389 |
| TMPRSS2  | 1.011506107  | 3.947990909 | 5.683145038  | 2.11E-08 | 6.48E-08 | 7.949374976 |
| TUBB2B   | -1.216449795 | 1.556295548 | -5.678830275 | 2.16E-08 | 6.62E-08 | 7.926177694 |
| FOXA2    | 1.143173535  | 3.122961786 | 5.660815574  | 2.39E-08 | 7.28E-08 | 7.829496008 |
| VIL1     | -1.172707661 | 1.092401695 | -5.64210206  | 2.65E-08 | 8.04E-08 | 7.729354618 |
| LY6D     | -1.244947162 | 1.250260426 | -5.59505148  | 3.43E-08 | 1.03E-07 | 7.478884319 |
| IL20RB   | -1.01518651  | 1.254734761 | -5.580804473 | 3.70E-08 | 1.11E-07 | 7.403411976 |
| ALOX15B  | 1.300245972  | 3.694713375 | 5.578940598  | 3.74E-08 | 1.12E-07 | 7.393551008 |
| TCN1     | -1.607438838 | 1.646659254 | -5.57420009  | 3.84E-08 | 1.15E-07 | 7.368484309 |
| TFF1     | -2.067743294 | 2.042357297 | -5.491413936 | 6.01E-08 | 1.77E-07 | 6.933815291 |
| C1orf116 | 1.144218527  | 4.945848592 | 5.429071479  | 8.39E-08 | 2.44E-07 | 6.610348857 |
| FDCSP    | -1.225581617 | 2.007736053 | -5.428260457 | 8.43E-08 | 2.45E-07 | 6.606162767 |

|          |              |             |              |             |             |              |
|----------|--------------|-------------|--------------|-------------|-------------|--------------|
| AKR1B10  | -1.930432409 | 1.987379205 | -5.42641335  | 8.51E-08    | 2.47E-07    | 6.59663102   |
| ANGPTL4  | -1.200026044 | 3.519173927 | -5.389423857 | 1.04E-07    | 2.99E-07    | 6.406367993  |
| HOXC10   | -1.048010713 | 0.995990455 | -5.388686425 | 1.04E-07    | 3.00E-07    | 6.402586807  |
| UBD      | -1.089957748 | 2.872955319 | -5.375869654 | 1.11E-07    | 3.20E-07    | 6.336943346  |
| HPGD     | 1.268673726  | 3.553224771 | 5.346785275  | 1.30E-07    | 3.70E-07    | 6.188506403  |
| SLC34A2  | 1.376597815  | 8.043219433 | 5.327117273  | 1.44E-07    | 4.09E-07    | 6.088540313  |
| CRLF1    | -1.717304855 | 3.120698479 | -5.325878287 | 1.45E-07    | 4.11E-07    | 6.082254111  |
| HLA-DQB1 | 1.002545696  | 5.721263445 | 5.284224948  | 1.80E-07    | 5.07E-07    | 5.871689718  |
| AGT      | -1.146196357 | 2.315159439 | -5.20734824  | 2.68E-07    | 7.43E-07    | 5.487005306  |
| CCL21    | 1.037380104  | 5.115779716 | 5.15739269   | 3.46E-07    | 9.52E-07    | 5.239779919  |
| FGB      | -2.010364754 | 1.977817706 | -5.112397413 | 4.35E-07    | 1.19E-06    | 5.018961074  |
| KRT6A    | -1.572869    | 1.852206368 | -5.041407044 | 6.21E-07    | 1.67E-06    | 4.674161301  |
| ADGRF1   | -1.07172463  | 2.009925742 | -5.041212387 | 6.22E-07    | 1.67E-06    | 4.673221912  |
| ARSE     | -1.051935721 | 2.671436411 | -4.999202207 | 7.67E-07    | 2.04E-06    | 4.471262952  |
| KLK11    | 1.301431037  | 2.316278392 | 4.982591756  | 8.33E-07    | 2.21E-06    | 4.391837176  |
| CCL19    | -1.159650416 | 4.026207057 | -4.960100212 | 9.31E-07    | 2.46E-06    | 4.284676143  |
| SPRR1B   | -1.31132821  | 1.363446388 | -4.93228204  | 1.07E-06    | 2.80E-06    | 4.152751671  |
| CDA      | -1.176233372 | 2.954028982 | -4.908929959 | 1.20E-06    | 3.13E-06    | 4.04253314   |
| SFTA3    | 1.070645567  | 4.526044444 | 4.902007615  | 1.24E-06    | 3.23E-06    | 4.009953001  |
| SERPINB5 | -1.005392367 | 1.1285634   | -4.882701739 | 1.36E-06    | 3.53E-06    | 3.919312842  |
| HABP2    | -1.053353945 | 2.016759373 | -4.833403305 | 1.73E-06    | 4.44E-06    | 3.68935253   |
| CCL18    | 1.106253437  | 5.586063113 | 4.831974187  | 1.74E-06    | 4.47E-06    | 3.682718237  |
| PCSK1N   | -1.056980064 | 2.210780096 | -4.799696666 | 2.03E-06    | 5.18E-06    | 3.533360193  |
| C16orf89 | 1.479726506  | 5.553843458 | 4.783041342  | 2.20E-06    | 5.59E-06    | 3.456651988  |
| CST6     | 1.09614902   | 3.365727603 | 4.775679143  | 2.28E-06    | 5.79E-06    | 3.422822869  |
| PRSS2    | -1.303780762 | 1.493819559 | -4.774649452 | 2.29E-06    | 5.81E-06    | 3.418095299  |
| INHA     | -1.043850817 | 1.053992062 | -4.750952701 | 2.56E-06    | 6.48E-06    | 3.30955767   |
| SMOC1    | -1.021357889 | 1.372756124 | -4.746265333 | 2.62E-06    | 6.62E-06    | 3.28814733   |
| PIGR     | 1.638866246  | 6.007079717 | 4.648659586  | 4.15E-06    | 1.03E-05    | 2.846760325  |
| TFPI2    | -1.510631513 | 3.491618553 | -4.610934744 | 4.95E-06    | 1.22E-05    | 2.67844061   |
| NAPSA    | 1.447940292  | 7.811215462 | 4.541323608  | 6.82E-06    | 1.66E-05    | 2.371195447  |
| VSIG1    | -1.204193548 | 1.866580495 | -4.496452355 | 8.37E-06    | 2.01E-05    | 2.175450205  |
| CXCL5    | 1.000272124  | 2.061809339 | 4.491167322  | 8.58E-06    | 2.06E-05    | 2.152514056  |
| GFRA3    | -1.138028273 | 2.071589811 | -4.421379742 | 1.17E-05    | 2.78E-05    | 1.85200704   |
| SERPINA1 | 1.052962419  | 6.903284399 | 4.41950357   | 1.18E-05    | 2.80E-05    | 1.843988819  |
| KRT81    | -1.014895831 | 1.112820587 | -4.413441929 | 1.22E-05    | 2.88E-05    | 1.818104815  |
| CLDN6    | -1.155673932 | 1.263404814 | -4.343704934 | 1.66E-05    | 3.86E-05    | 1.522707615  |
| MMP7     | -1.129636827 | 4.162042128 | -4.286936446 | 2.13E-05    | 4.89E-05    | 1.285495498  |
| SFRP2    | -1.058278394 | 5.099654523 | -4.276563857 | 2.22E-05    | 5.10E-05    | 1.24246875   |
| BPIFA1   | -1.986837828 | 3.938633125 | -4.210351524 | 2.96E-05    | 6.71E-05    | 0.970117606  |
| AGR3     | 1.156140185  | 4.874459036 | 4.173142016  | 3.47E-05    | 7.82E-05    | 0.818816428  |
| MAGEA3   | -1.002835156 | 0.921754194 | -4.124471012 | 4.27E-05    | 9.53E-05    | 0.622818479  |
| CCL20    | -1.055346072 | 3.439546816 | -4.08708432  | 4.99E-05    | 0.000110681 | 0.473733623  |
| KRT17    | -1.140366309 | 3.627033715 | -3.939823407 | 9.16E-05    | 0.000196988 | -0.101015674 |
| CPS1     | -1.256223735 | 1.419309141 | -3.917838947 | 0.000100169 | 0.00021443  | -0.185107558 |
| SAA1     | -1.037448893 | 3.010703781 | -3.854154744 | 0.000129315 | 0.000273691 | -0.426185174 |
| TM4SF4   | -1.01280689  | 1.321289799 | -3.717667615 | 0.00022089  | 0.000454338 | -0.930210896 |
| AKR1C2   | -1.159502906 | 2.523867683 | -3.092894696 | 0.002079    | 0.003793253 | -3.014883411 |
| TFF3     | -1.01779631  | 4.335422995 | -2.907222479 | 0.003788187 | 0.006671352 | -3.563219679 |
| CALCA    | -1.01717155  | 1.22840469  | -2.794251405 | 0.005376756 | 0.009258973 | -3.880727664 |
| MSMB     | -1.021104209 | 3.06997048  | -2.578881861 | 0.010161232 | 0.016786706 | -4.452060948 |

Supplementary Table 5. Expression patterns of genes shared by HRGs and DEGs in the TCGA database

|      | gene     | logFC    | AveExpr  | t        | P.Value  | adj.P.Val | B        |
|------|----------|----------|----------|----------|----------|-----------|----------|
| Up   | CAV1     | 3.884711 | 4.883969 | 22.47595 | 1.28E-80 | 2.15E-78  | 173.0412 |
|      | CAVIN1   | 2.107729 | 5.668371 | 17.59484 | 1.09E-55 | 6.67E-54  | 115.8533 |
|      | NDST1    | 1.408346 | 3.613775 | 16.59375 | 9.35E-51 | 4.77E-49  | 104.5466 |
|      | PPP1R15A | 1.64722  | 4.857138 | 16.18172 | 9.38E-49 | 4.42E-47  | 99.95871 |
|      | KLF6     | 1.671909 | 4.886625 | 15.78515 | 7.61E-47 | 3.24E-45  | 95.58345 |
|      | GPC3     | 2.607174 | 3.200603 | 14.02849 | 1.26E-38 | 3.31E-37  | 76.75945 |
|      | SRPX     | 1.749925 | 2.263775 | 13.88162 | 5.84E-38 | 1.48E-36  | 75.23211 |
|      | PDGFB    | 1.228525 | 2.817479 | 11.85683 | 3.82E-29 | 5.50E-28  | 55.06498 |
|      | FBP1     | 1.58875  | 5.863903 | 11.18639 | 2.11E-26 | 2.52E-25  | 48.80132 |
|      | MAFF     | 1.001798 | 2.745159 | 10.89318 | 3.10E-25 | 3.44E-24  | 46.13501 |
|      | IL6      | 1.834434 | 1.976962 | 10.76492 | 9.91E-25 | 1.07E-23  | 44.98328 |
|      | ZFP36    | 1.68438  | 6.752456 | 10.58446 | 5.01E-24 | 5.14E-23  | 43.37802 |
|      | DUSP1    | 1.78988  | 7.023695 | 10.50369 | 1.03E-23 | 1.03E-22  | 42.66549 |
|      | DCN      | 1.583655 | 4.781792 | 10.3782  | 3.12E-23 | 3.01E-22  | 41.56578 |
|      | ETS1     | 1.139514 | 3.96382  | 10.35345 | 3.88E-23 | 3.71E-22  | 41.34991 |
|      | ATF3     | 1.568855 | 3.557186 | 9.637916 | 1.81E-20 | 1.43E-19  | 35.26603 |
|      | SDC2     | 1.155231 | 3.457781 | 9.553253 | 3.67E-20 | 2.84E-19  | 34.5667  |
|      | SELENBP1 | 1.681175 | 5.47572  | 9.030582 | 2.61E-18 | 1.77E-17  | 30.34975 |
|      | S100A4   | 1.512044 | 7.064488 | 8.72812  | 2.85E-17 | 1.79E-16  | 27.99072 |
|      | CITED2   | 1.127979 | 5.452317 | 8.514029 | 1.49E-16 | 8.89E-16  | 26.3581  |
|      | PLAC8    | 1.369944 | 2.160618 | 8.437396 | 2.67E-16 | 1.57E-15  | 25.78133 |
|      | SLC2A3   | 1.197281 | 3.291523 | 8.363412 | 4.68E-16 | 2.69E-15  | 25.22835 |
|      | FOS      | 1.57483  | 6.265473 | 8.358597 | 4.86E-16 | 2.78E-15  | 25.19249 |
|      | AKAP12   | 1.364938 | 2.335599 | 8.161325 | 2.13E-15 | 1.16E-14  | 23.73737 |
|      | KDELR3   | -1.95174 | 4.416794 | -15.8275 | 4.77E-47 | 2.06E-45  | 96.04843 |
|      | GAPDH    | -1.64191 | 9.20182  | -14.6337 | 2.07E-41 | 6.34E-40  | 83.13271 |
|      | SLC2A1   | -2.68509 | 4.343978 | -14.4539 | 1.41E-40 | 4.14E-39  | 81.22623 |
|      | ERO1A    | -1.70753 | 4.57842  | -14.3191 | 5.88E-40 | 1.65E-38  | 79.80469 |
|      | EFNA3    | -1.42926 | 1.725867 | -13.9105 | 4.32E-38 | 1.11E-36  | 75.53213 |
|      | LDHA     | -1.31613 | 6.845356 | -13.8675 | 6.76E-38 | 1.71E-36  | 75.08568 |
|      | ENO1     | -1.23051 | 8.709842 | -13.5139 | 2.64E-36 | 6.01E-35  | 71.44356 |
|      | GPI      | -1.09344 | 5.203407 | -12.8278 | 2.80E-33 | 5.32E-32  | 64.51795 |
|      | TPI1     | -1.11518 | 7.494514 | -12.4761 | 9.25E-32 | 1.59E-30  | 61.04487 |
| TPBG | -1.26717 | 2.59543  | -12.2918 | 5.66E-31 | 9.23E-30 | 59.24654  |          |
| Down | ALDOA    | -1.1798  | 7.603397 | -12.2492 | 8.59E-31 | 1.39E-29  | 58.8327  |
|      | PFKP     | -1.79156 | 4.649134 | -12.0369 | 6.75E-30 | 1.02E-28  | 56.78489 |
|      | CP       | -2.70249 | 4.572566 | -11.0782 | 5.71E-26 | 6.62E-25  | 47.81185 |
|      | IGFBP3   | -1.9269  | 5.520419 | -10.3944 | 2.70E-23 | 2.63E-22  | 41.70712 |
|      | COL5A1   | -1.69752 | 4.332137 | -10.1567 | 2.16E-22 | 1.97E-21  | 39.64677 |
|      | AK4      | -1.27398 | 1.778837 | -9.38215 | 1.51E-19 | 1.12E-18  | 33.16702 |
|      | MIF      | -1.1439  | 5.148043 | -9.21473 | 5.93E-19 | 4.21E-18  | 31.81551 |
|      | IER3     | -1.01397 | 5.593316 | -6.41094 | 3.03E-10 | 1.09E-09  | 12.08398 |
|      | ANGPTL4  | -1.20003 | 3.519174 | -5.38942 | 1.04E-07 | 2.99E-07  | 6.406368 |
|      | INHA     | -1.04385 | 1.053992 | -4.75095 | 2.56E-06 | 6.48E-06  | 3.309558 |





|         |         |          |         |         |         |         |        |          |          |          |         |         |          |
|---------|---------|----------|---------|---------|---------|---------|--------|----------|----------|----------|---------|---------|----------|
| NRROS   | STOM    | FAM78A   | CLNS1A  | PPARG   | ETV4    | NELFE   | OVCH2  | TIMM17A  | TJP1     | SLC4A1   | WDR4    | NMUR1   | STARD8   |
| TSPAN32 | SYNE3   | EMC8     | VPS39   | TOMM401 | KAT2B   | CNR1    | FFAR4  | PRICKLE2 | KRT79    | MFAP4    | SYT15   | MRPS26  | IFFO1    |
| CYBRD1  | DPYS    | TPK1     | WDR74   | FAM167B | PRELP   | STYXL1  | TIMP3  | RIPOR1   | GPI      | ATP5MC2  | SEC14L6 | INAFM2  | SPINT1   |
| TACO1   | PEAR1   | MRPS10   | NHSL2   | ROMO1   | CD34    | DLG3    | DPEP2  | FOS      | LRRC25   | TSPAN17  | RETREG1 | DOK2    | CORO1C   |
| FAM162B | CD244   | VIP      | SOX13   | WWP2    | DTX2    | GLDN    | APH1A  | GPRC5A   | DIXDC1   | PHKA1    | EPAS1   | LMO2    | PSMD4    |
| N4BP2L1 | AHNAK   | SNX25    | PDZD2   | STYK1   | KLF6    | RNF122  | IGSF6  | ADIPOQ   | TLR4     | MRPS34   | RGS9    | TNNC1   | MME      |
| EFNB1   | SLC15A3 | GALK1    | SOX5    | MYBL2   | CDK7    | SGPL1   | ADRA1A | MAFF     | APOLD1   | ATP5MC1  | RCN1    | CCT3    | CSF2RB   |
| TSACC   | STAC3   | CASP3    | TBRG4   | ARHGEF6 | MAD2L2  | ADGRA2  | NR4A3  | FBXW4    | PAFAH1B  | MAP3K15  | CACNA1C | PSMD7   | C18orf63 |
| COASY   | RHOA    | CNTN6    | ADRB2   | PKP3    | RAPGEF2 | LRRC36  | ITGB2  | SLC39A8  | NIP7     | CACNA1S  | ATXN1L  | TBXA2R  | CHMP3    |
| RPS6KA2 | PLPPR4  | C11orf96 | SOX4    | MED19   | SYVN1   | LIG3    | LAMA2  | UNC5C    | CASP1    | KRTCAP3  | GNAI2   | GIPC2   | KCNA4    |
| SMARCA5 | METTL5  | PAPSS1   | PDCD6IP | ATP5MPL | P3H2    | CHPF2   | THOP1  | IL18R1   | KDF1     | ABTB1    | KIF22   | ST6GALN | CPED1    |
| POLR2H  | DOCK8   | TMEM88   | ATP1B2  | TUBB6   | H2AFX   | GOLGA5  | KRT27  | MRPL13   | PKHD1L1  | PEBP4    | ANKRD29 | ABHD11  | TPSAB1   |
| TBC1D9  | POP5    | ARHGEF3  | ARHGAP1 | GP9     | LAT2    | PDLIM2  | CRTAM  | GIMAP2   | ITGAL    | MSTO1    | SESN1   | RSPO4   | PYCR1    |
| HSPA5   | CSTF2   | TRIOBP   | UBE2M   | RAB5IF  | FREM3   | ITPRIP  | ERH    | FCGR3B   | CD4      | TNR      | TMSB10  | IARS    | CTU2     |
| FOXRED1 | SIGLEC1 | ALG8     | PTGIS   | MEOX2   | EFTUD2  | FRMD3   | CMTM5  | MAGI2    | ECI1     | CYP7A1   | TPSB2   | FLVCR2  | SELP     |
| MYZAP   | TIMM10  | PIK3IP1  | ARHGEF2 | ERIC4   | MBOAT7  | EMCN    | LTC4S  | TGFB2    | NABP2    | HLF      | S1PR4   | RMDN3   | OCIAD2   |
| CARS    | ARF4    | EGR3     | SF3B6   | FRMD4A  | HDHD3   | SIGMAR1 | NATD1  | KIAA1324 | NPLOC4   | RPN1     | RNF187  | PSMG3   | DUOXA1   |
| SLC27A3 | UPK3B   | PPP6C    | STAP2   | SRPK1   | STX12   | LBH     | CASP5  | MDK      | CNP      | TIMM13   | ZDHHHC3 | ARPC3   | BOLA1    |
| TEF     | PDE4B   | SULT1A1  | TRIAP1  | MLF2    | EXOSC4  | AKAP13  | MLST8  | HLA.E    | AIFM1    | FBXL5    | PHF2    | PFDN4   | MRPL52   |
| CTNNAL1 | PRKD1   | DCHS1    | RCC1L   | UBL3    | JUNB    | ABCA9   | TMED9  | CDK5     | SECISBP2 | CCDC102I | LSM5    | GALNT15 | CCT4     |
|         | TPBG    | EGFL6    | CD300LF | LIMS2   | CXorf36 | FIG4    | RAVER2 | ZNF25    | PRKG1    | TNFAIP1  | ENOPH1  | EFEMP2  | RGS18    |



Supplementary Table 7. List of identified H&IRGs

CAV1  
CAVIN1  
NDST1  
PPP1R15A  
KDEL3  
KLF6  
GAPDH  
ERO1A  
GPC3  
EFNA3  
LDHA  
ENO1  
GPI  
TPI1  
TPBG  
ALDOA  
PFKP  
PDGFB  
FBP1  
MAFF  
IL6  
ZFP36  
DUSP1  
DCN  
ETS1  
ATF3  
SDC2  
MIF  
SELENBP1  
FOS

Supplementary Table 8. Univariate Cox regression analysis in LUAD

| id       | HR       | HR.95L   | HR.95H   | pvalue   |
|----------|----------|----------|----------|----------|
| ALDOA    | 1.391452 | 1.133078 | 1.708743 | 0.001621 |
| ATF3     | 0.975586 | 0.859145 | 1.107807 | 0.703089 |
| CAV1     | 1.092619 | 0.978841 | 1.219621 | 0.114385 |
| DCN      | 0.887511 | 0.787653 | 1.00003  | 0.050057 |
| DUSP1    | 0.978273 | 0.875857 | 1.092664 | 0.697034 |
| EFNA3    | 1.159426 | 0.969638 | 1.386361 | 0.104823 |
| ENO1     | 1.319533 | 1.034696 | 1.682781 | 0.025425 |
| FBP1     | 0.784737 | 0.688243 | 0.894761 | 0.000293 |
| FOS      | 0.924302 | 0.831852 | 1.027027 | 0.143198 |
| GAPDH    | 1.505493 | 1.256657 | 1.803602 | 9.06E-06 |
| GPC3     | 0.871319 | 0.780128 | 0.973169 | 0.0146   |
| GPI      | 1.481849 | 1.196988 | 1.834501 | 0.000305 |
| IL6      | 0.996136 | 0.886896 | 1.118832 | 0.947918 |
| KDEL3    | 1.024022 | 0.869449 | 1.206076 | 0.776157 |
| KLF6     | 0.995781 | 0.829349 | 1.195611 | 0.963857 |
| LDHA     | 1.723769 | 1.396164 | 2.128245 | 4.12E-07 |
| MAFF     | 1.269663 | 1.008218 | 1.598903 | 0.042403 |
| MIF      | 1.24081  | 1.051325 | 1.464446 | 0.010712 |
| NDST1    | 0.950424 | 0.760915 | 1.18713  | 0.654055 |
| PDGFB    | 1.242008 | 1.040918 | 1.481946 | 0.016174 |
| PFKP     | 1.273511 | 1.116267 | 1.452904 | 0.000323 |
| SDC2     | 1.005794 | 0.867701 | 1.165865 | 0.938884 |
| SELENBP1 | 0.838131 | 0.755863 | 0.929353 | 0.000808 |
| TPI1     | 1.480293 | 1.17544  | 1.864211 | 0.000857 |
| ZFP36    | 0.97745  | 0.860363 | 1.110473 | 0.726075 |

Supplementary Table 9. List of DEGs identified between high- and low-risk groups

| Gene     | logFC    | AveExpr  | t        | P-value  | adj. P-value | B        |
|----------|----------|----------|----------|----------|--------------|----------|
| LDHA     | 0.922942 | 6.974682 | 18.60254 | 4.62E-59 | 9.01E-55     | 122.7628 |
| GAPDH    | 0.850257 | 9.362282 | 12.93322 | 3.36E-33 | 3.28E-29     | 64.4427  |
| LOXL2    | 1.147576 | 3.03805  | 12.65719 | 4.87E-32 | 3.17E-28     | 61.82197 |
| SLC2A1   | 1.326628 | 4.622609 | 11.82959 | 1.24E-28 | 6.05E-25     | 54.14166 |
| STC1     | 1.139023 | 2.590905 | 11.68366 | 4.80E-28 | 1.87E-24     | 52.81672 |
| ERO1A    | 0.845268 | 4.75534  | 11.6276  | 8.05E-28 | 2.62E-24     | 52.31024 |
| PLOD2    | 1.165533 | 3.586983 | 11.5908  | 1.13E-27 | 3.15E-24     | 51.97855 |
| GPD1L    | -0.79155 | 3.731824 | -11.4299 | 4.93E-27 | 1.20E-23     | 50.53547 |
| SPHK1    | 0.810664 | 1.98649  | 11.1233  | 7.92E-26 | 1.56E-22     | 47.81736 |
| ACSS1    | -0.80766 | 2.605283 | -11.1226 | 7.97E-26 | 1.56E-22     | 47.81131 |
| SELENBP1 | -1.27271 | 5.303556 | -11.085  | 1.12E-25 | 1.98E-22     | 47.48122 |
| EGLN3    | 1.229307 | 2.678203 | 10.86653 | 7.83E-25 | 1.27E-21     | 45.57536 |
| ESYT3    | -0.71279 | 1.36614  | -10.82   | 1.18E-24 | 1.78E-21     | 45.17216 |
| TMPRSS2  | -1.1848  | 3.844384 | -10.7732 | 1.79E-24 | 2.49E-21     | 44.76862 |
| CCNB1    | 0.930251 | 3.795787 | 10.72482 | 2.74E-24 | 3.56E-21     | 44.35167 |
| SFTA3    | -1.43596 | 4.42333  | -10.6051 | 7.80E-24 | 9.52E-21     | 43.32592 |
| PGK1     | 0.652392 | 6.752186 | 10.55302 | 1.23E-23 | 1.41E-20     | 42.8816  |
| ADH1B    | -1.33573 | 2.188533 | -10.5424 | 1.35E-23 | 1.46E-20     | 42.7911  |
| C1orf116 | -1.36517 | 4.816248 | -10.5075 | 1.83E-23 | 1.88E-20     | 42.49442 |
| VIPR1    | -0.67745 | 1.468733 | -10.4245 | 3.75E-23 | 3.66E-20     | 41.79125 |
| ATP13A4  | -1.20976 | 2.234654 | -10.338  | 7.89E-23 | 7.34E-20     | 41.06281 |
| CTSH     | -1.13974 | 5.976605 | -10.2973 | 1.12E-22 | 9.93E-20     | 40.72104 |
| IL6R     | -0.71536 | 3.149635 | -10.2865 | 1.23E-22 | 1.04E-19     | 40.63038 |
| INMT     | -1.09643 | 2.572217 | -10.2439 | 1.77E-22 | 1.42E-19     | 40.2745  |
| TNFAIP6  | 0.75449  | 1.949226 | 10.21549 | 2.25E-22 | 1.69E-19     | 40.0373  |
| PLA2G4F  | -0.80126 | 1.425447 | -10.1108 | 5.48E-22 | 3.82E-19     | 39.16723 |
| RRM2     | 0.943143 | 3.224588 | 10.07041 | 7.72E-22 | 5.20E-19     | 38.83313 |
| ARNTL2   | 0.917475 | 2.138183 | 10.01161 | 1.27E-21 | 8.25E-19     | 38.34831 |
| CYP4B1   | -1.73301 | 3.485559 | -10.0028 | 1.36E-21 | 8.60E-19     | 38.2758  |
| ADGRF5   | -1.21817 | 4.60606  | -9.99648 | 1.44E-21 | 8.78E-19     | 38.22384 |
| VEGFD    | -0.89639 | 1.220933 | -9.96983 | 1.80E-21 | 1.07E-18     | 38.00494 |
| SUSD2    | -1.59319 | 3.92636  | -9.96202 | 1.92E-21 | 1.10E-18     | 37.94088 |
| DLGAP5   | 0.827168 | 2.205371 | 9.922644 | 2.67E-21 | 1.45E-18     | 37.61835 |
| TMEM158  | 0.749001 | 1.434108 | 9.916128 | 2.82E-21 | 1.49E-18     | 37.56505 |
| TMEM125  | -0.86587 | 5.204755 | -9.85194 | 4.83E-21 | 2.36E-18     | 37.0413  |
| BUB1B    | 0.71763  | 1.947708 | 9.817498 | 6.43E-21 | 3.06E-18     | 36.76122 |
| FBP1     | -0.84478 | 5.688654 | -9.74477 | 1.17E-20 | 5.33E-18     | 36.17192 |
| NCAPG    | 0.727578 | 1.813076 | 9.732288 | 1.30E-20 | 5.78E-18     | 36.07112 |
| KPNA2    | 0.770084 | 4.928798 | 9.634083 | 2.92E-20 | 1.27E-17     | 35.28082 |
| LYPD3    | 1.169224 | 2.205543 | 9.630469 | 3.01E-20 | 1.28E-17     | 35.25184 |
| CCNB2    | 0.792082 | 2.77867  | 9.618999 | 3.31E-20 | 1.37E-17     | 35.15991 |
| ANLN     | 0.925484 | 2.761223 | 9.6076   | 3.63E-20 | 1.48E-17     | 35.06863 |
| TPX2     | 1.022113 | 3.635697 | 9.599532 | 3.88E-20 | 1.52E-17     | 35.00407 |
| FAM189A  | -0.74408 | 1.722085 | -9.59939 | 3.89E-20 | 1.52E-17     | 35.00293 |
| C16orf89 | -1.87371 | 5.392011 | -9.59379 | 4.07E-20 | 1.56E-17     | 34.95818 |
| KIF4A    | 0.799928 | 2.175688 | 9.590408 | 4.18E-20 | 1.57E-17     | 34.9311  |
| CLIC5    | -0.91572 | 1.796515 | -9.58517 | 4.37E-20 | 1.61E-17     | 34.88924 |
| FAM83D   | 0.794692 | 2.555747 | 9.538517 | 6.39E-20 | 2.27E-17     | 34.51701 |
| MTHFD2   | 0.687285 | 4.025153 | 9.464615 | 1.17E-19 | 4.06E-17     | 33.92994 |
| SMOX     | 0.690834 | 2.331715 | 9.462347 | 1.19E-19 | 4.07E-17     | 33.91198 |
| MAD2L1   | 0.671107 | 1.950988 | 9.4454   | 1.36E-19 | 4.51E-17     | 33.77782 |
| CDC45    | 0.800078 | 2.521235 | 9.436644 | 1.46E-19 | 4.76E-17     | 33.70857 |
| ARHGAP1  | 0.614092 | 1.766105 | 9.423383 | 1.63E-19 | 5.21E-17     | 33.60377 |
| ABCC6    | -0.62608 | 1.759492 | -9.40708 | 1.86E-19 | 5.85E-17     | 33.4751  |

|          |          |          |          |          |          |          |
|----------|----------|----------|----------|----------|----------|----------|
| CCNA2    | 0.802635 | 2.770297 | 9.363304 | 2.64E-19 | 7.94E-17 | 33.13028 |
| GREM1    | 0.979669 | 1.857621 | 9.350707 | 2.93E-19 | 8.66E-17 | 33.03127 |
| CDC6     | 0.737764 | 2.173298 | 9.323219 | 3.65E-19 | 1.06E-16 | 32.81554 |
| BTBD9    | -0.59372 | 2.730217 | -9.31325 | 3.95E-19 | 1.14E-16 | 32.73739 |
| CACNA2D  | -1.27731 | 2.531727 | -9.30529 | 4.21E-19 | 1.19E-16 | 32.67511 |
| CDKN3    | 0.790975 | 2.299901 | 9.278932 | 5.20E-19 | 1.45E-16 | 32.4689  |
| STC2     | 0.786308 | 1.700869 | 9.276545 | 5.31E-19 | 1.46E-16 | 32.45025 |
| SKA1     | 0.616556 | 1.427355 | 9.268715 | 5.65E-19 | 1.53E-16 | 32.38909 |
| BIRC5    | 0.940798 | 3.164282 | 9.265311 | 5.80E-19 | 1.55E-16 | 32.36253 |
| GGTLC1   | -1.44076 | 2.546767 | -9.2414  | 7.03E-19 | 1.85E-16 | 32.17606 |
| SNX30    | -0.70251 | 2.652872 | -9.20753 | 9.20E-19 | 2.36E-16 | 31.91248 |
| EXO1     | 0.630538 | 1.5465   | 9.187509 | 1.08E-18 | 2.74E-16 | 31.757   |
| PLK1     | 0.725498 | 2.478948 | 9.18455  | 1.10E-18 | 2.77E-16 | 31.73404 |
| ABCA3    | -1.23785 | 4.351847 | -9.17662 | 1.18E-18 | 2.91E-16 | 31.67256 |
| HLF      | -0.86615 | 1.634243 | -9.15538 | 1.39E-18 | 3.29E-16 | 31.50801 |
| CDC20    | 0.960707 | 3.777043 | 9.133987 | 1.65E-18 | 3.83E-16 | 31.34254 |
| FOXM1    | 0.853833 | 2.701786 | 9.132467 | 1.67E-18 | 3.84E-16 | 31.33079 |
| ECT2     | 0.694692 | 3.19277  | 9.105939 | 2.06E-18 | 4.62E-16 | 31.12602 |
| CD302    | -0.61132 | 2.104538 | -9.10104 | 2.14E-18 | 4.75E-16 | 31.08824 |
| CTHRC1   | 1.04334  | 4.887631 | 9.092379 | 2.29E-18 | 4.97E-16 | 31.02152 |
| CGNL1    | -0.624   | 2.23795  | -9.0841  | 2.45E-18 | 5.25E-16 | 30.95774 |
| KIF23    | 0.632306 | 1.806421 | 9.070544 | 2.72E-18 | 5.78E-16 | 30.85348 |
| SLC16A3  | 0.760406 | 4.228423 | 9.04665  | 3.29E-18 | 6.83E-16 | 30.66992 |
| PLPP4    | 0.656617 | 0.964836 | 9.033703 | 3.64E-18 | 7.40E-16 | 30.5706  |
| PRR11    | 0.706783 | 2.182773 | 9.030582 | 3.73E-18 | 7.51E-16 | 30.54668 |
| C1QTNF6  | 0.619862 | 2.285277 | 8.993279 | 5.00E-18 | 9.95E-16 | 30.26116 |
| CEP55    | 0.790209 | 2.743194 | 8.991651 | 5.06E-18 | 9.98E-16 | 30.24872 |
| HMMR     | 0.674488 | 2.053813 | 8.978992 | 5.59E-18 | 1.09E-15 | 30.15203 |
| HSD17B6  | -1.07461 | 2.672274 | -8.97605 | 5.72E-18 | 1.10E-15 | 30.12956 |
| HJURP    | 0.758142 | 2.103634 | 8.941298 | 7.50E-18 | 1.42E-15 | 29.86472 |
| NUSAP1   | 0.711653 | 3.308997 | 8.933768 | 7.95E-18 | 1.49E-15 | 29.80743 |
| PBK      | 0.802442 | 2.118148 | 8.91609  | 9.13E-18 | 1.68E-15 | 29.67305 |
| CFAP221  | -0.63388 | 1.210609 | -8.90615 | 9.86E-18 | 1.80E-15 | 29.59759 |
| ATP8A1   | -0.71892 | 2.294049 | -8.90165 | 1.02E-17 | 1.85E-15 | 29.56344 |
| NCAPH    | 0.70456  | 2.180231 | 8.864978 | 1.36E-17 | 2.41E-15 | 29.28565 |
| SPOCK1   | 0.842373 | 1.258565 | 8.822068 | 1.89E-17 | 3.27E-15 | 28.96164 |
| MAMDC2   | -0.73769 | 1.53598  | -8.80252 | 2.20E-17 | 3.70E-15 | 28.81441 |
| PFKP     | 0.832288 | 4.825851 | 8.784937 | 2.52E-17 | 4.10E-15 | 28.6822  |
| ADAM12   | 0.74547  | 1.645666 | 8.778429 | 2.65E-17 | 4.25E-15 | 28.63331 |
| BUB1     | 0.671308 | 2.128179 | 8.769409 | 2.84E-17 | 4.51E-15 | 28.5656  |
| CDC45    | 0.685968 | 2.030416 | 8.765056 | 2.94E-17 | 4.63E-15 | 28.53294 |
| CDK1     | 0.762874 | 3.004714 | 8.745778 | 3.41E-17 | 5.32E-15 | 28.38843 |
| RASGRF1  | -0.70564 | 1.06476  | -8.73576 | 3.68E-17 | 5.70E-15 | 28.31346 |
| ITGA5    | 0.68966  | 3.627662 | 8.726636 | 3.95E-17 | 6.04E-15 | 28.24517 |
| VEPH1    | -0.70435 | 1.375904 | -8.71732 | 4.24E-17 | 6.33E-15 | 28.17552 |
| KIF2C    | 0.787132 | 2.594228 | 8.717095 | 4.25E-17 | 6.33E-15 | 28.17386 |
| LAMP3    | -1.03726 | 4.220923 | -8.70808 | 4.55E-17 | 6.73E-15 | 28.10655 |
| COL11A1  | 1.238915 | 2.137247 | 8.697542 | 4.93E-17 | 7.18E-15 | 28.02788 |
| VSIG2    | -1.29228 | 3.243461 | -8.69461 | 5.04E-17 | 7.23E-15 | 28.006   |
| AK1      | -0.62656 | 2.776513 | -8.69438 | 5.05E-17 | 7.23E-15 | 28.00431 |
| UCK2     | 0.680442 | 2.205755 | 8.678445 | 5.71E-17 | 7.96E-15 | 27.88554 |
| UBE2C    | 1.105141 | 4.356292 | 8.673784 | 5.91E-17 | 8.19E-15 | 27.85084 |
| KIF20A   | 0.650701 | 2.383569 | 8.66135  | 6.50E-17 | 8.92E-15 | 27.75832 |
| LMO3     | -1.04697 | 3.088905 | -8.62541 | 8.55E-17 | 1.16E-14 | 27.49141 |
| SHH      | -0.59993 | 1.070961 | -8.61775 | 9.06E-17 | 1.21E-14 | 27.43469 |
| SERPINE1 | 1.011093 | 4.531727 | 8.591909 | 1.10E-16 | 1.44E-14 | 27.24343 |

|         |          |          |          |          |          |          |
|---------|----------|----------|----------|----------|----------|----------|
| NDC80   | 0.652398 | 1.90347  | 8.589377 | 1.12E-16 | 1.46E-14 | 27.22471 |
| FOSL1   | 0.989546 | 2.212335 | 8.574632 | 1.26E-16 | 1.62E-14 | 27.1158  |
| TMEM163 | -0.83523 | 2.292071 | -8.55216 | 1.49E-16 | 1.91E-14 | 26.95006 |
| PXMP4   | -0.66629 | 2.781622 | -8.54622 | 1.56E-16 | 1.97E-14 | 26.90632 |
| PRR15L  | -0.94133 | 5.064927 | -8.52045 | 1.89E-16 | 2.37E-14 | 26.71674 |
| FNIP2   | -0.61515 | 2.776098 | -8.51898 | 1.91E-16 | 2.38E-14 | 26.70598 |
| CPAMD8  | -0.77612 | 1.611009 | -8.51273 | 2.01E-16 | 2.47E-14 | 26.66009 |
| KLF15   | -0.7126  | 1.596427 | -8.51222 | 2.01E-16 | 2.47E-14 | 26.65635 |
| TUBB3   | 0.586762 | 1.367247 | 8.484237 | 2.49E-16 | 3.03E-14 | 26.45113 |
| PLA2G1B | -1.13072 | 1.822874 | -8.46396 | 2.89E-16 | 3.44E-14 | 26.30277 |
| SCN7A   | -0.62098 | 1.335542 | -8.46105 | 2.96E-16 | 3.50E-14 | 26.28146 |
| PRC1    | 0.641282 | 2.617065 | 8.456895 | 3.05E-16 | 3.59E-14 | 26.25112 |
| CENPA   | 0.688752 | 1.84157  | 8.443589 | 3.37E-16 | 3.92E-14 | 26.15396 |
| C7      | -1.17536 | 3.341665 | -8.43754 | 3.53E-16 | 4.07E-14 | 26.10981 |
| MMP12   | 1.322584 | 3.217694 | 8.435849 | 3.57E-16 | 4.10E-14 | 26.09749 |
| DUOX1   | -0.84959 | 2.032929 | -8.42217 | 3.96E-16 | 4.52E-14 | 25.99778 |
| FSCN1   | 0.917044 | 4.506128 | 8.421068 | 3.99E-16 | 4.53E-14 | 25.98976 |
| KIF11   | 0.636695 | 2.500135 | 8.417562 | 4.10E-16 | 4.58E-14 | 25.96423 |
| DLC1    | -0.75986 | 2.701866 | -8.4144  | 4.19E-16 | 4.65E-14 | 25.94125 |
| RACGAP1 | 0.60145  | 2.989398 | 8.407125 | 4.43E-16 | 4.86E-14 | 25.88828 |
| DUOXA1  | -0.7845  | 1.858684 | -8.40303 | 4.57E-16 | 4.98E-14 | 25.85848 |
| AURKA   | 0.728142 | 2.914967 | 8.400727 | 4.64E-16 | 4.98E-14 | 25.84175 |
| CDKL2   | -0.72128 | 1.667209 | -8.39097 | 4.99E-16 | 5.30E-14 | 25.77082 |
| ADAMTS1 | 0.610946 | 1.727419 | 8.38801  | 5.11E-16 | 5.39E-14 | 25.74934 |
| MMP14   | 0.725271 | 5.958977 | 8.386029 | 5.18E-16 | 5.42E-14 | 25.73496 |
| MELK    | 0.746045 | 2.316667 | 8.368005 | 5.93E-16 | 6.12E-14 | 25.6042  |
| NEK2    | 0.721382 | 2.317009 | 8.35441  | 6.56E-16 | 6.74E-14 | 25.50571 |
| HMGA1   | 0.762041 | 6.518265 | 8.336753 | 7.48E-16 | 7.56E-14 | 25.37798 |
| NKX2-1  | -1.14154 | 5.282582 | -8.32613 | 8.09E-16 | 8.14E-14 | 25.30122 |
| RHOV    | 1.154341 | 3.183901 | 8.317233 | 8.64E-16 | 8.65E-14 | 25.237   |
| POSTN   | 0.924639 | 5.165232 | 8.30058  | 9.77E-16 | 9.68E-14 | 25.11693 |
| SLC15A2 | -0.69368 | 2.102868 | -8.29866 | 9.91E-16 | 9.77E-14 | 25.10311 |
| ADM     | 0.853708 | 2.771472 | 8.297381 | 1.00E-15 | 9.82E-14 | 25.09388 |
| RAD51AP | 0.606441 | 2.091234 | 8.285777 | 1.09E-15 | 1.06E-13 | 25.01034 |
| SULF1   | 0.946416 | 3.770381 | 8.281114 | 1.13E-15 | 1.09E-13 | 24.9768  |
| SCTR    | -1.06107 | 2.099028 | -8.26618 | 1.26E-15 | 1.21E-13 | 24.86947 |
| PRDM16  | -0.61391 | 1.147115 | -8.25221 | 1.40E-15 | 1.32E-13 | 24.76917 |
| LRRK2   | -1.00695 | 2.344896 | -8.24894 | 1.43E-15 | 1.35E-13 | 24.74572 |
| DAPK1   | -0.6258  | 3.282066 | -8.22428 | 1.71E-15 | 1.59E-13 | 24.56911 |
| COL4A3  | -0.71096 | 1.557345 | -8.21212 | 1.88E-15 | 1.73E-13 | 24.48216 |
| TWIST1  | 0.609377 | 0.969815 | 8.197728 | 2.08E-15 | 1.89E-13 | 24.37936 |
| GPC6    | 0.709752 | 1.663052 | 8.183539 | 2.31E-15 | 2.08E-13 | 24.27816 |
| TOP2A   | 0.859033 | 3.927017 | 8.1697   | 2.56E-15 | 2.28E-13 | 24.17958 |
| GFPT2   | 0.593251 | 1.957962 | 8.165734 | 2.63E-15 | 2.33E-13 | 24.15135 |
| MKI67   | 0.729118 | 2.53614  | 8.165668 | 2.63E-15 | 2.33E-13 | 24.15088 |
| EMP2    | -0.61967 | 4.652927 | -8.13042 | 3.41E-15 | 2.89E-13 | 23.90047 |
| AQP4    | -1.26256 | 2.934779 | -8.12581 | 3.52E-15 | 2.98E-13 | 23.86778 |
| CENPW   | 0.68942  | 3.06228  | 8.111572 | 3.91E-15 | 3.28E-13 | 23.7669  |
| LOX     | 0.687659 | 2.802323 | 8.110872 | 3.93E-15 | 3.28E-13 | 23.76195 |
| COL5A2  | 0.851208 | 4.46397  | 8.09689  | 4.35E-15 | 3.60E-13 | 23.66303 |
| KIFC1   | 0.720787 | 2.844094 | 8.095897 | 4.38E-15 | 3.61E-13 | 23.65601 |
| SCGB3A2 | -2.09188 | 5.715086 | -8.08804 | 4.64E-15 | 3.80E-13 | 23.60048 |
| ITGA9   | -0.61144 | 2.231255 | -8.08382 | 4.78E-15 | 3.91E-13 | 23.57069 |
| AGER    | -1.32649 | 3.74982  | -8.06499 | 5.48E-15 | 4.42E-13 | 23.43782 |
| PCLAF   | 0.60221  | 2.316115 | 8.060886 | 5.65E-15 | 4.54E-13 | 23.4089  |
| PEBP4   | -1.30498 | 2.764375 | -8.05315 | 5.97E-15 | 4.76E-13 | 23.35441 |

|         |          |          |          |          |          |          |
|---------|----------|----------|----------|----------|----------|----------|
| NAMPT   | 0.761417 | 4.47097  | 8.048744 | 6.16E-15 | 4.89E-13 | 23.3234  |
| PTTG1   | 0.691999 | 3.436654 | 8.041486 | 6.50E-15 | 5.11E-13 | 23.27234 |
| SEC14L6 | -0.62536 | 1.265521 | -7.99731 | 8.93E-15 | 6.95E-13 | 22.96232 |
| GJB2    | 1.067127 | 3.1945   | 7.99495  | 9.09E-15 | 7.04E-13 | 22.94576 |
| PLAUR   | 0.689874 | 4.119753 | 7.984052 | 9.83E-15 | 7.55E-13 | 22.8695  |
| PMAIP1  | 0.787686 | 2.982881 | 7.976655 | 1.04E-14 | 7.93E-13 | 22.81778 |
| MYBL2   | 0.998513 | 3.747806 | 7.964539 | 1.13E-14 | 8.56E-13 | 22.73315 |
| NFIX    | -0.70756 | 3.458955 | -7.95528 | 1.21E-14 | 9.11E-13 | 22.66852 |
| PIGR    | -1.80658 | 5.832103 | -7.93987 | 1.35E-14 | 1.01E-12 | 22.56114 |
| UBE2S   | 0.634778 | 2.776711 | 7.912003 | 1.65E-14 | 1.21E-12 | 22.3673  |
| CDC4A8  | 0.666683 | 2.925218 | 7.906636 | 1.71E-14 | 1.25E-12 | 22.33004 |
| NAPSA   | -1.62886 | 7.662918 | -7.89724 | 1.83E-14 | 1.32E-12 | 22.26483 |
| SFTPB   | -1.88067 | 9.55676  | -7.89138 | 1.91E-14 | 1.37E-12 | 22.22422 |
| ANGPTL4 | 1.102754 | 3.627126 | 7.872084 | 2.19E-14 | 1.56E-12 | 22.09058 |
| KIF18B  | 0.620566 | 1.729671 | 7.858262 | 2.41E-14 | 1.71E-12 | 21.99502 |
| NUF2    | 0.652348 | 2.014769 | 7.855991 | 2.45E-14 | 1.73E-12 | 21.97933 |
| LIFR    | -0.61482 | 2.489257 | -7.8519  | 2.53E-14 | 1.77E-12 | 21.95107 |
| RNASE1  | -0.99615 | 7.909878 | -7.8493  | 2.57E-14 | 1.80E-12 | 21.93314 |
| METTL7A | -0.64956 | 4.013381 | -7.84185 | 2.71E-14 | 1.88E-12 | 21.88173 |
| AURKB   | 0.728181 | 2.555211 | 7.834798 | 2.85E-14 | 1.97E-12 | 21.83309 |
| ST3GAL5 | -0.7582  | 3.67318  | -7.80312 | 3.57E-14 | 2.38E-12 | 21.61509 |
| CD1C    | -0.75584 | 1.871032 | -7.79296 | 3.83E-14 | 2.54E-12 | 21.5453  |
| SLC7A5  | 0.852248 | 4.397569 | 7.786421 | 4.01E-14 | 2.62E-12 | 21.50042 |
| DSG2    | 0.667551 | 4.821206 | 7.782555 | 4.12E-14 | 2.68E-12 | 21.47391 |
| COL12A1 | 0.953547 | 2.910077 | 7.778662 | 4.24E-14 | 2.73E-12 | 21.44722 |
| HOPX    | -1.1353  | 4.642892 | -7.76655 | 4.62E-14 | 2.96E-12 | 21.36428 |
| CXCL8   | 1.041102 | 3.829151 | 7.764971 | 4.67E-14 | 2.98E-12 | 21.35344 |
| ICAM5   | -0.64962 | 1.546893 | -7.7605  | 4.82E-14 | 3.06E-12 | 21.32285 |
| TK1     | 0.751594 | 4.761218 | 7.75711  | 4.93E-14 | 3.13E-12 | 21.29965 |
| PIFO    | -0.71791 | 1.885539 | -7.74675 | 5.31E-14 | 3.34E-12 | 21.2288  |
| CAVIN2  | -0.77841 | 3.330876 | -7.72914 | 6.01E-14 | 3.75E-12 | 21.10861 |
| KRT6A   | 1.532579 | 1.978503 | 7.72537  | 6.17E-14 | 3.82E-12 | 21.08291 |
| ZWINT   | 0.635051 | 3.625237 | 7.705069 | 7.11E-14 | 4.35E-12 | 20.94464 |
| CHRDL1  | -0.82549 | 2.071768 | -7.68507 | 8.18E-14 | 4.96E-12 | 20.80869 |
| SFTPC   | -2.31342 | 5.152663 | -7.67513 | 8.76E-14 | 5.26E-12 | 20.74124 |
| ALDH2   | -0.59298 | 4.401797 | -7.67433 | 8.81E-14 | 5.28E-12 | 20.73579 |
| TNNC1   | -0.79867 | 2.275905 | -7.65067 | 1.04E-13 | 6.15E-12 | 20.57557 |
| SPAG5   | 0.618391 | 2.549771 | 7.646241 | 1.07E-13 | 6.32E-12 | 20.54559 |
| MDFI    | 0.744761 | 3.063786 | 7.641    | 1.11E-13 | 6.50E-12 | 20.51015 |
| B3GNT8  | -0.7982  | 3.07348  | -7.63521 | 1.16E-13 | 6.72E-12 | 20.47103 |
| STEAP1  | 0.893483 | 3.431295 | 7.621668 | 1.27E-13 | 7.25E-12 | 20.37961 |
| ZNF385B | -0.80056 | 1.350001 | -7.61942 | 1.29E-13 | 7.33E-12 | 20.36448 |
| TDRD10  | -0.66344 | 1.292001 | -7.60969 | 1.38E-13 | 7.77E-12 | 20.29885 |
| MCM4    | 0.595462 | 3.636753 | 7.606416 | 1.41E-13 | 7.93E-12 | 20.27681 |
| SFTPD   | -1.53842 | 5.824874 | -7.59938 | 1.48E-13 | 8.28E-12 | 20.22943 |
| CYP24A1 | 1.356082 | 2.933751 | 7.581459 | 1.68E-13 | 9.29E-12 | 20.10893 |
| CYB5A   | -0.66048 | 3.925475 | -7.57601 | 1.74E-13 | 9.60E-12 | 20.07231 |
| GJB3    | 0.975003 | 1.771724 | 7.575871 | 1.75E-13 | 9.60E-12 | 20.07141 |
| SCGB3A1 | -1.97816 | 5.395648 | -7.56077 | 1.94E-13 | 1.05E-11 | 19.97007 |
| CLEC3B  | -0.77058 | 2.671113 | -7.55348 | 2.04E-13 | 1.10E-11 | 19.92124 |
| CCNE1   | 0.623479 | 1.878211 | 7.549907 | 2.09E-13 | 1.13E-11 | 19.89732 |
| FAM83A  | 1.073681 | 3.717893 | 7.547533 | 2.12E-13 | 1.14E-11 | 19.88143 |
| IFT57   | -0.67785 | 4.319374 | -7.54397 | 2.18E-13 | 1.16E-11 | 19.8576  |
| TRIP13  | 0.679341 | 2.527445 | 7.532396 | 2.36E-13 | 1.25E-11 | 19.78019 |
| GPR160  | -0.64285 | 3.194564 | -7.52479 | 2.48E-13 | 1.30E-11 | 19.72935 |
| INHBA   | 0.688777 | 2.577999 | 7.521407 | 2.54E-13 | 1.32E-11 | 19.70679 |

|          |          |          |          |          |          |          |
|----------|----------|----------|----------|----------|----------|----------|
| COL4A4   | -0.59065 | 1.832125 | -7.52082 | 2.55E-13 | 1.32E-11 | 19.70285 |
| CLDN18   | -1.38177 | 2.415768 | -7.48548 | 3.25E-13 | 1.66E-11 | 19.4674  |
| DRAM1    | -0.714   | 4.794067 | -7.46952 | 3.62E-13 | 1.83E-11 | 19.36136 |
| ZDHHC11  | -0.64659 | 1.24892  | -7.4657  | 3.72E-13 | 1.87E-11 | 19.33604 |
| UNC13B   | -0.62002 | 4.072646 | -7.45358 | 4.04E-13 | 2.02E-11 | 19.25566 |
| WIF1     | -1.23548 | 2.023215 | -7.43056 | 4.73E-13 | 2.30E-11 | 19.10323 |
| FMO5     | -0.85349 | 2.921446 | -7.39813 | 5.89E-13 | 2.80E-11 | 18.8892  |
| NPC2     | -0.74297 | 7.404507 | -7.38555 | 6.42E-13 | 3.02E-11 | 18.80639 |
| MS4A15   | -1.15203 | 1.785124 | -7.35841 | 7.71E-13 | 3.57E-11 | 18.62809 |
| STRIP2   | 0.591851 | 1.266443 | 7.354163 | 7.94E-13 | 3.65E-11 | 18.60025 |
| RAP1GAP  | -0.87086 | 3.611509 | -7.35278 | 8.01E-13 | 3.67E-11 | 18.59115 |
| AHNAK2   | 0.796761 | 2.284732 | 7.348237 | 8.26E-13 | 3.78E-11 | 18.56141 |
| THBS2    | 0.867956 | 4.551828 | 7.319843 | 1.00E-12 | 4.47E-11 | 18.37564 |
| SLC6A8   | 0.692218 | 2.7927   | 7.311384 | 1.06E-12 | 4.71E-11 | 18.32041 |
| SLC47A1  | -0.60796 | 1.501516 | -7.30446 | 1.11E-12 | 4.91E-11 | 18.27522 |
| IGFBP3   | 0.85908  | 5.725137 | 7.28408  | 1.27E-12 | 5.58E-11 | 18.14249 |
| CXCL17   | -1.17986 | 7.040542 | -7.27338 | 1.37E-12 | 5.94E-11 | 18.07294 |
| CD109    | 0.666765 | 1.933074 | 7.25746  | 1.52E-12 | 6.54E-11 | 17.96954 |
| CEBPA    | -0.70763 | 2.955524 | -7.22407 | 1.90E-12 | 7.99E-11 | 17.75335 |
| TMEM130  | -0.76526 | 1.619612 | -7.21168 | 2.06E-12 | 8.54E-11 | 17.6733  |
| C5orf38  | -0.80946 | 1.878268 | -7.1706  | 2.71E-12 | 1.10E-10 | 17.40879 |
| SLC34A2  | -1.20911 | 7.903006 | -7.16334 | 2.84E-12 | 1.15E-10 | 17.36215 |
| PARM1    | -0.84212 | 4.790917 | -7.14873 | 3.13E-12 | 1.25E-10 | 17.26846 |
| LAMC2    | 0.936206 | 4.784413 | 7.146845 | 3.17E-12 | 1.27E-10 | 17.25636 |
| COL3A1   | 0.886755 | 7.756234 | 7.143921 | 3.23E-12 | 1.29E-10 | 17.23762 |
| PLAU     | 0.954808 | 5.209179 | 7.131167 | 3.52E-12 | 1.39E-10 | 17.15599 |
| DOK4     | -0.64135 | 3.509914 | -7.12752 | 3.60E-12 | 1.41E-10 | 17.13267 |
| SCNN1B   | -0.91703 | 3.5034   | -7.11839 | 3.82E-12 | 1.49E-10 | 17.07436 |
| VCAN     | 0.761943 | 3.710208 | 7.114453 | 3.92E-12 | 1.52E-10 | 17.04919 |
| FHL2     | 0.675369 | 3.118772 | 7.106712 | 4.13E-12 | 1.59E-10 | 16.9998  |
| MYBPHL   | -0.72449 | 1.166634 | -7.09032 | 4.60E-12 | 1.75E-10 | 16.89534 |
| SLC16A1  | 0.699228 | 2.049733 | 7.08814  | 4.67E-12 | 1.77E-10 | 16.88147 |
| SLC26A9  | -1.01897 | 2.48465  | -7.08436 | 4.78E-12 | 1.81E-10 | 16.85742 |
| FOLR1    | -1.25077 | 5.529289 | -7.08105 | 4.89E-12 | 1.85E-10 | 16.83637 |
| TROAP    | 0.607677 | 1.929396 | 7.062505 | 5.52E-12 | 2.04E-10 | 16.71856 |
| PCDH7    | 0.60808  | 1.408585 | 7.000768 | 8.26E-12 | 2.88E-10 | 16.3282  |
| UBE2T    | 0.626483 | 3.961279 | 6.978157 | 9.56E-12 | 3.30E-10 | 16.18592 |
| KRT16    | 0.933001 | 1.503077 | 6.97509  | 9.75E-12 | 3.35E-10 | 16.16666 |
| SLCO4C1  | -0.65893 | 1.693994 | -6.96871 | 1.02E-11 | 3.48E-10 | 16.1266  |
| SLC22A31 | -1.14934 | 4.605144 | -6.9572  | 1.10E-11 | 3.70E-10 | 16.05439 |
| C4BPA    | -1.34294 | 5.21102  | -6.94569 | 1.18E-11 | 3.94E-10 | 15.98227 |
| ADGRF4   | 0.616102 | 1.125398 | 6.940465 | 1.22E-11 | 4.05E-10 | 15.94961 |
| DUSP5    | 0.623946 | 3.945123 | 6.935793 | 1.26E-11 | 4.17E-10 | 15.92039 |
| SLC22A3  | -0.83726 | 2.88427  | -6.93216 | 1.29E-11 | 4.24E-10 | 15.89767 |
| MT2A     | 0.784735 | 6.09618  | 6.906456 | 1.52E-11 | 4.90E-10 | 15.73729 |
| DNALI1   | -0.65046 | 2.61443  | -6.9028  | 1.56E-11 | 5.00E-10 | 15.71449 |
| IRX2     | -1.00727 | 2.576296 | -6.90214 | 1.56E-11 | 5.01E-10 | 15.71043 |
| EIF4EBP1 | 0.666432 | 4.997646 | 6.893969 | 1.65E-11 | 5.24E-10 | 15.65954 |
| HILPDA   | 0.664954 | 3.398209 | 6.888469 | 1.70E-11 | 5.37E-10 | 15.62534 |
| HLA-DMA  | -0.64607 | 5.804636 | -6.8773  | 1.83E-11 | 5.71E-10 | 15.55594 |
| COL1A2   | 0.788892 | 6.935085 | 6.860901 | 2.03E-11 | 6.27E-10 | 15.45422 |
| RHOBTB2  | -0.6751  | 3.846003 | -6.84296 | 2.28E-11 | 6.95E-10 | 15.34315 |
| PGC      | -2.10189 | 4.505488 | -6.83904 | 2.34E-11 | 7.10E-10 | 15.31894 |
| MBIP     | -0.60863 | 4.426332 | -6.83027 | 2.47E-11 | 7.48E-10 | 15.26476 |
| CERS4    | -0.6283  | 3.296529 | -6.80588 | 2.89E-11 | 8.56E-10 | 15.11442 |
| MLPH     | -0.70516 | 4.431552 | -6.80221 | 2.96E-11 | 8.72E-10 | 15.09183 |

|          |          |          |          |          |          |          |
|----------|----------|----------|----------|----------|----------|----------|
| SHE      | -0.64367 | 1.826389 | -6.79514 | 3.09E-11 | 9.07E-10 | 15.04831 |
| MXRA5    | 0.725696 | 3.424311 | 6.781725 | 3.37E-11 | 9.77E-10 | 14.96593 |
| GGT6     | -0.80026 | 1.843327 | -6.78081 | 3.39E-11 | 9.81E-10 | 14.96032 |
| GPC3     | -0.81847 | 2.941852 | -6.77668 | 3.48E-11 | 1.00E-09 | 14.93497 |
| HOXD1    | -0.65918 | 1.204294 | -6.771   | 3.60E-11 | 1.03E-09 | 14.90014 |
| FOXA2    | -0.90017 | 3.001813 | -6.76773 | 3.68E-11 | 1.05E-09 | 14.8801  |
| COL1A1   | 0.915062 | 7.644074 | 6.751395 | 4.08E-11 | 1.16E-09 | 14.78013 |
| ACSL5    | -0.72263 | 5.115936 | -6.73008 | 4.67E-11 | 1.31E-09 | 14.64999 |
| SLC40A1  | -0.65409 | 5.188408 | -6.70918 | 5.32E-11 | 1.48E-09 | 14.52267 |
| FCER1A   | -0.80671 | 1.89648  | -6.7087  | 5.34E-11 | 1.48E-09 | 14.51975 |
| ACKR1    | -0.72784 | 2.328775 | -6.70513 | 5.46E-11 | 1.51E-09 | 14.49803 |
| IRX5     | -0.68198 | 2.418061 | -6.70084 | 5.61E-11 | 1.55E-09 | 14.47196 |
| PTPN13   | -0.73877 | 2.634418 | -6.69549 | 5.80E-11 | 1.59E-09 | 14.43944 |
| ZNF750   | -0.68368 | 1.921752 | -6.68041 | 6.38E-11 | 1.73E-09 | 14.34798 |
| MMP1     | 1.241549 | 4.016607 | 6.668824 | 6.86E-11 | 1.85E-09 | 14.27781 |
| C15orf48 | 0.980271 | 4.599305 | 6.656468 | 7.41E-11 | 1.96E-09 | 14.20308 |
| MYEOV    | 0.908057 | 1.629274 | 6.647462 | 7.84E-11 | 2.07E-09 | 14.14869 |
| CDA      | 1.032771 | 3.050658 | 6.640971 | 8.16E-11 | 2.15E-09 | 14.10952 |
| PRG4     | -0.6197  | 1.008973 | -6.63514 | 8.46E-11 | 2.22E-09 | 14.07434 |
| C9orf152 | -0.72392 | 2.778167 | -6.63388 | 8.53E-11 | 2.23E-09 | 14.0668  |
| MGP      | -0.70376 | 5.951468 | -6.63233 | 8.61E-11 | 2.25E-09 | 14.05743 |
| SFRP2    | 1.049648 | 5.213651 | 6.630034 | 8.73E-11 | 2.28E-09 | 14.0436  |
| CLIC6    | -1.03521 | 4.546789 | -6.61491 | 9.60E-11 | 2.48E-09 | 13.95261 |
| TNS4     | 0.955574 | 1.956546 | 6.603435 | 1.03E-10 | 2.64E-09 | 13.88366 |
| CYP27A1  | -0.61438 | 4.226054 | -6.59529 | 1.08E-10 | 2.77E-09 | 13.83478 |
| COL7A1   | 0.61863  | 1.35844  | 6.593707 | 1.09E-10 | 2.79E-09 | 13.82531 |
| ALOX15B  | -0.99491 | 3.558383 | -6.59055 | 1.12E-10 | 2.83E-09 | 13.80638 |
| AK4      | 0.587213 | 1.902197 | 6.573501 | 1.24E-10 | 3.09E-09 | 13.70432 |
| SUSD4    | -0.60386 | 1.845605 | -6.56465 | 1.31E-10 | 3.24E-09 | 13.6514  |
| SELENOP  | -0.62766 | 3.849257 | -6.51514 | 1.78E-10 | 4.21E-09 | 13.3566  |
| BMP3     | -0.78586 | 1.964947 | -6.4859  | 2.13E-10 | 4.94E-09 | 13.18339 |
| KCNK5    | -0.6929  | 3.807591 | -6.47826 | 2.23E-10 | 5.13E-09 | 13.13826 |
| A2M      | -0.6379  | 7.081351 | -6.46038 | 2.48E-10 | 5.62E-09 | 13.03276 |
| TMEM45   | 0.645304 | 2.199651 | 6.439732 | 2.82E-10 | 6.30E-09 | 12.91124 |
| COL5A1   | 0.693882 | 4.515635 | 6.438212 | 2.84E-10 | 6.35E-09 | 12.9023  |
| GGH      | 0.657177 | 2.859242 | 6.419056 | 3.19E-10 | 7.06E-09 | 12.78988 |
| TCEA3    | -0.63242 | 4.014463 | -6.41829 | 3.21E-10 | 7.09E-09 | 12.7854  |
| LGALS1   | 0.609149 | 7.389476 | 6.399099 | 3.61E-10 | 7.87E-09 | 12.67306 |
| NDNF     | -0.85371 | 3.727096 | -6.3648  | 4.43E-10 | 9.57E-09 | 12.473   |
| MMP11    | 0.934943 | 3.251725 | 6.360464 | 4.55E-10 | 9.78E-09 | 12.44778 |
| PTGDS    | -0.78956 | 4.300786 | -6.3599  | 4.57E-10 | 9.80E-09 | 12.4445  |
| MFSD2A   | -0.62002 | 3.24231  | -6.35786 | 4.62E-10 | 9.89E-09 | 12.43265 |
| CPXM1    | 0.585259 | 2.508784 | 6.357191 | 4.64E-10 | 9.92E-09 | 12.42874 |
| TLR2     | -0.59172 | 3.320283 | -6.33422 | 5.33E-10 | 1.12E-08 | 12.2954  |
| PTHLH    | 0.590348 | 1.125977 | 6.32043  | 5.79E-10 | 1.20E-08 | 12.21556 |
| AQP3     | -1.00742 | 6.628751 | -6.31894 | 5.84E-10 | 1.21E-08 | 12.20691 |
| PI3      | 0.993948 | 2.017437 | 6.29677  | 6.67E-10 | 1.36E-08 | 12.0789  |
| COL15A1  | 0.616175 | 3.023044 | 6.290192 | 6.94E-10 | 1.41E-08 | 12.04099 |
| KYNU     | 0.595069 | 1.194366 | 6.28408  | 7.19E-10 | 1.46E-08 | 12.00578 |
| HLA-DPB1 | -0.67201 | 6.911599 | -6.27995 | 7.37E-10 | 1.49E-08 | 11.98202 |
| ABO      | -0.63053 | 2.452745 | -6.27952 | 7.39E-10 | 1.49E-08 | 11.97953 |
| DES      | -0.68199 | 1.91941  | -6.27427 | 7.63E-10 | 1.53E-08 | 11.94935 |
| TPPP3    | -0.80715 | 3.365675 | -6.27409 | 7.64E-10 | 1.53E-08 | 11.94834 |
| FHL1     | -0.5875  | 2.334896 | -6.26608 | 8.01E-10 | 1.59E-08 | 11.90231 |
| CYP4X1   | -0.68408 | 2.227706 | -6.26063 | 8.27E-10 | 1.63E-08 | 11.87103 |
| PALM3    | -0.67097 | 1.963056 | -6.23477 | 9.65E-10 | 1.88E-08 | 11.7229  |



|          |          |          |          |          |          |          |
|----------|----------|----------|----------|----------|----------|----------|
| GZMB     | 0.683415 | 2.642897 | 6.229794 | 9.93E-10 | 1.92E-08 | 11.69443 |
| CPE      | 0.850001 | 4.910169 | 6.221881 | 1.04E-09 | 1.99E-08 | 11.64923 |
| DDIT4    | 0.647912 | 5.553565 | 6.217913 | 1.07E-09 | 2.03E-08 | 11.62659 |
| APOD     | -0.98617 | 3.655639 | -6.18467 | 1.30E-09 | 2.44E-08 | 11.43739 |
| SFTA2    | -1.05102 | 6.980478 | -6.17941 | 1.34E-09 | 2.51E-08 | 11.40751 |
| SFTPA1   | -1.74891 | 7.890994 | -6.17822 | 1.35E-09 | 2.53E-08 | 11.40078 |
| ATOH8    | -0.70591 | 2.035062 | -6.16507 | 1.46E-09 | 2.71E-08 | 11.3262  |
| EPHX1    | -0.69264 | 6.719632 | -6.1631  | 1.47E-09 | 2.73E-08 | 11.31508 |
| FKBP10   | 0.679537 | 4.631596 | 6.146625 | 1.62E-09 | 2.97E-08 | 11.22189 |
| SPINK5   | -0.81071 | 1.776021 | -6.13154 | 1.77E-09 | 3.21E-08 | 11.13675 |
| RSPO3    | 0.623383 | 1.106954 | 6.123232 | 1.86E-09 | 3.36E-08 | 11.08996 |
| ITGA11   | 0.588816 | 1.965686 | 6.119725 | 1.90E-09 | 3.42E-08 | 11.07022 |
| GPC4     | -0.60574 | 4.374668 | -6.11967 | 1.90E-09 | 3.42E-08 | 11.0699  |
| ROS1     | -0.79157 | 2.82116  | -6.11848 | 1.91E-09 | 3.44E-08 | 11.06318 |
| IGF2BP2  | 0.617326 | 2.357728 | 6.111262 | 1.99E-09 | 3.58E-08 | 11.02262 |
| PLA2G12I | -0.68429 | 1.265944 | -6.0955  | 2.19E-09 | 3.90E-08 | 10.93409 |
| PITX1    | 0.68823  | 1.858782 | 6.088839 | 2.27E-09 | 4.03E-08 | 10.89677 |
| CCL20    | 0.998004 | 3.52549  | 6.045357 | 2.92E-09 | 5.02E-08 | 10.65388 |
| CHIA     | -0.69052 | 1.127761 | -6.02773 | 3.24E-09 | 5.50E-08 | 10.55586 |
| PFN2     | 0.702446 | 4.390118 | 6.020248 | 3.38E-09 | 5.70E-08 | 10.5143  |
| FGFR3    | -0.75096 | 2.510927 | -6.0149  | 3.48E-09 | 5.85E-08 | 10.48464 |
| HHIPL2   | 0.709068 | 1.14948  | 5.987447 | 4.08E-09 | 6.75E-08 | 10.33272 |
| MFAP4    | -0.75938 | 4.823565 | -5.98559 | 4.12E-09 | 6.81E-08 | 10.32246 |
| CRYM     | -0.81061 | 2.153629 | -5.97866 | 4.29E-09 | 7.06E-08 | 10.28421 |
| IL20RB   | 0.703891 | 1.326008 | 5.974628 | 4.39E-09 | 7.21E-08 | 10.26199 |
| BTG2     | -0.58717 | 5.498168 | -5.96303 | 4.69E-09 | 7.67E-08 | 10.19811 |
| HLA-DPA  | -0.66793 | 6.154963 | -5.96001 | 4.77E-09 | 7.80E-08 | 10.18149 |
| SFTPA2   | -1.66521 | 8.171622 | -5.9459  | 5.17E-09 | 8.38E-08 | 10.10394 |
| DKK1     | 0.913831 | 1.680335 | 5.916611 | 6.11E-09 | 9.71E-08 | 9.943509 |
| LPCAT1   | -0.66928 | 6.482401 | -5.89406 | 6.94E-09 | 1.09E-07 | 9.820453 |
| FCGBP    | -0.73016 | 2.172071 | -5.88859 | 7.16E-09 | 1.12E-07 | 9.790679 |
| S100A9   | 1.035851 | 7.56635  | 5.867602 | 8.06E-09 | 1.25E-07 | 9.67658  |
| MAOA     | -0.66003 | 4.194613 | -5.84816 | 9.00E-09 | 1.37E-07 | 9.571247 |
| CD207    | -0.83908 | 1.832868 | -5.84621 | 9.10E-09 | 1.39E-07 | 9.560692 |
| IER3     | 0.590088 | 5.700201 | 5.84065  | 9.38E-09 | 1.42E-07 | 9.530608 |
| BCAM     | -0.59879 | 5.676284 | -5.84034 | 9.40E-09 | 1.42E-07 | 9.52896  |
| HTRA3    | 0.633878 | 4.015319 | 5.782809 | 1.30E-08 | 1.88E-07 | 9.21932  |
| TGFBI    | 0.650708 | 4.749924 | 5.778982 | 1.33E-08 | 1.91E-07 | 9.198815 |
| CAPN8    | -0.78216 | 3.667178 | -5.77285 | 1.37E-08 | 1.97E-07 | 9.166014 |
| GAL      | 0.606611 | 0.863638 | 5.753933 | 1.52E-08 | 2.17E-07 | 9.064925 |
| COL9A2   | -0.64844 | 2.544048 | -5.74715 | 1.58E-08 | 2.25E-07 | 9.02874  |
| NR0B2    | -0.75437 | 1.429779 | -5.7253  | 1.78E-08 | 2.50E-07 | 8.912472 |
| SCGB1A1  | -1.68871 | 4.599986 | -5.71224 | 1.92E-08 | 2.66E-07 | 8.84317  |
| PLA2G10  | -0.69082 | 1.805746 | -5.7098  | 1.94E-08 | 2.69E-07 | 8.830246 |
| HLA-DOA  | -0.61136 | 3.780978 | -5.70805 | 1.96E-08 | 2.71E-07 | 8.821003 |
| LRRC31   | -0.5867  | 1.147135 | -5.70077 | 2.04E-08 | 2.80E-07 | 8.782459 |
| CA9      | 0.96863  | 2.303403 | 5.68059  | 2.28E-08 | 3.11E-07 | 8.675815 |
| ELN      | -0.67045 | 3.614379 | -5.67048 | 2.41E-08 | 3.27E-07 | 8.622529 |
| APOH     | -0.76961 | 1.65993  | -5.61802 | 3.21E-08 | 4.23E-07 | 8.347319 |
| DSP      | 0.719052 | 4.758125 | 5.607468 | 3.40E-08 | 4.45E-07 | 8.292234 |
| SPP1     | 0.988257 | 6.907102 | 5.603241 | 3.48E-08 | 4.54E-07 | 8.270196 |
| MMP9     | 0.746384 | 4.520265 | 5.600679 | 3.53E-08 | 4.59E-07 | 8.256846 |
| PHYHD1   | -0.59694 | 2.434522 | -5.59047 | 3.73E-08 | 4.82E-07 | 8.20368  |
| INHA     | 0.81062  | 1.164755 | 5.582104 | 3.91E-08 | 5.01E-07 | 8.160205 |
| KIF12    | -0.61494 | 1.955026 | -5.56751 | 4.23E-08 | 5.38E-07 | 8.084466 |
| CAPS     | -0.59766 | 3.076306 | -5.56554 | 4.27E-08 | 5.42E-07 | 8.074253 |

|          |          |          |          |          |          |          |
|----------|----------|----------|----------|----------|----------|----------|
| ANKRD65  | -0.63392 | 3.328894 | -5.53013 | 5.17E-08 | 6.42E-07 | 7.891307 |
| IRX3     | -0.62881 | 3.795443 | -5.50025 | 6.07E-08 | 7.39E-07 | 7.73772  |
| AGR3     | -1.0033  | 4.76487  | -5.47945 | 6.78E-08 | 8.11E-07 | 7.631241 |
| SERPINB5 | 0.745407 | 1.219127 | 5.460173 | 7.51E-08 | 8.89E-07 | 7.532874 |
| CPB2     | -0.65305 | 1.149337 | -5.45972 | 7.53E-08 | 8.90E-07 | 7.530575 |
| LRRC15   | 0.628952 | 1.958141 | 5.447579 | 8.03E-08 | 9.44E-07 | 7.468776 |
| SRPX2    | 0.609524 | 3.246509 | 5.44301  | 8.23E-08 | 9.63E-07 | 7.445559 |
| KIAA1324 | -0.80184 | 2.764178 | -5.42964 | 8.83E-08 | 1.02E-06 | 7.377685 |
| AQP1     | -0.85343 | 5.939965 | -5.40668 | 9.97E-08 | 1.14E-06 | 7.261543 |
| BNIP1    | -0.58976 | 1.936918 | -5.38406 | 1.12E-07 | 1.27E-06 | 7.147522 |
| SLC7A11  | 0.617627 | 1.836614 | 5.356353 | 1.30E-07 | 1.44E-06 | 7.00841  |
| FNDC1    | 0.596186 | 2.202283 | 5.344322 | 1.38E-07 | 1.52E-06 | 6.948209 |
| CIT      | -0.65521 | 2.864518 | -5.31945 | 1.57E-07 | 1.71E-06 | 6.824132 |
| KRT17    | 1.004206 | 3.76689  | 5.281339 | 1.92E-07 | 2.04E-06 | 6.63504  |
| SLC44A4  | -0.66388 | 4.981685 | -5.25432 | 2.21E-07 | 2.31E-06 | 6.501712 |
| CHIT1    | -0.77525 | 2.47215  | -5.22398 | 2.58E-07 | 2.66E-06 | 6.352701 |
| HLA-DQB  | -0.65187 | 5.600328 | -5.22168 | 2.61E-07 | 2.69E-06 | 6.341439 |
| GDF15    | -0.73801 | 4.697503 | -5.21229 | 2.74E-07 | 2.81E-06 | 6.29553  |
| CRTAC1   | -0.68858 | 2.370421 | -5.19571 | 2.98E-07 | 3.03E-06 | 6.214606 |
| LPL      | -0.68981 | 2.92338  | -5.19169 | 3.04E-07 | 3.08E-06 | 6.195015 |
| HABP2    | -0.7476  | 2.123986 | -5.16389 | 3.50E-07 | 3.52E-06 | 6.059897 |
| CPA3     | -0.65289 | 3.234999 | -5.12229 | 4.32E-07 | 4.25E-06 | 5.858987 |
| ABCC2    | 0.667381 | 0.884855 | 5.112967 | 4.53E-07 | 4.44E-06 | 5.814157 |
| S100A8   | 0.78328  | 3.87029  | 5.106163 | 4.69E-07 | 4.58E-06 | 5.781485 |
| GKN2     | -0.77494 | 1.457565 | -5.09917 | 4.85E-07 | 4.72E-06 | 5.747968 |
| C2CD4A   | 0.589438 | 1.887702 | 5.090254 | 5.07E-07 | 4.92E-06 | 5.705247 |
| CLU      | -0.70565 | 5.17618  | -5.07489 | 5.48E-07 | 5.24E-06 | 5.631847 |
| HAS3     | -0.63935 | 2.511107 | -5.06917 | 5.64E-07 | 5.39E-06 | 5.604526 |
| HLA-DRB  | -0.70706 | 7.287705 | -5.03679 | 6.63E-07 | 6.21E-06 | 5.450626 |
| MFSD4A   | -0.67501 | 2.64285  | -5.03054 | 6.84E-07 | 6.38E-06 | 5.421016 |
| DMBT1    | -0.95551 | 2.994242 | -5.02762 | 6.94E-07 | 6.46E-06 | 5.407187 |
| HLA-DRB  | -0.58876 | 8.93724  | -4.99851 | 8.01E-07 | 7.32E-06 | 5.269808 |
| B3GNT7   | -0.63423 | 4.073286 | -4.97173 | 9.14E-07 | 8.25E-06 | 5.144047 |
| SAA1     | 0.867016 | 3.083627 | 4.939104 | 1.07E-06 | 9.51E-06 | 4.991644 |
| KLK6     | 0.684835 | 0.992476 | 4.87909  | 1.44E-06 | 1.23E-05 | 4.713705 |
| STEAP4   | -0.61642 | 3.715663 | -4.87033 | 1.50E-06 | 1.28E-05 | 4.673406 |
| NRGN     | -0.65087 | 3.746222 | -4.83059 | 1.81E-06 | 1.51E-05 | 4.491352 |
| SLC1A7   | -0.72316 | 1.48294  | -4.78511 | 2.25E-06 | 1.83E-05 | 4.284653 |
| CPS1     | 1.040116 | 1.574015 | 4.779615 | 2.31E-06 | 1.88E-05 | 4.25982  |
| HLA-DQB  | -0.70263 | 4.389584 | -4.77844 | 2.33E-06 | 1.88E-05 | 4.254517 |
| CD1A     | -0.602   | 1.659486 | -4.7671  | 2.46E-06 | 1.97E-05 | 4.203297 |
| KRT81    | 0.725071 | 1.209519 | 4.756016 | 2.59E-06 | 2.07E-05 | 4.153389 |
| MUC1     | -0.59496 | 7.335829 | -4.74407 | 2.74E-06 | 2.18E-05 | 4.099678 |
| TMPRSS1  | 0.710647 | 1.73552  | 4.71865  | 3.09E-06 | 2.41E-05 | 3.985861 |
| GPR87    | 0.705873 | 1.875853 | 4.708743 | 3.23E-06 | 2.52E-05 | 3.941643 |
| FOXJ1    | -0.64728 | 3.416103 | -4.68386 | 3.63E-06 | 2.79E-05 | 3.830958 |
| NTS      | 0.815121 | 0.913102 | 4.679396 | 3.71E-06 | 2.85E-05 | 3.811164 |
| DPP4     | -0.69943 | 4.046902 | -4.67048 | 3.87E-06 | 2.94E-05 | 3.77166  |
| DUSP4    | 0.637654 | 3.14587  | 4.665372 | 3.96E-06 | 3.00E-05 | 3.749073 |
| MUCL3    | -0.58533 | 0.973781 | -4.6595  | 4.07E-06 | 3.07E-05 | 3.723138 |
| MAGEA3   | 0.76585  | 1.037185 | 4.649332 | 4.27E-06 | 3.20E-05 | 3.67827  |
| AC007906 | -0.62219 | 1.838392 | -4.58226 | 5.82E-06 | 4.21E-05 | 3.384616 |
| ALPL     | -0.75336 | 4.259763 | -4.57545 | 6.00E-06 | 4.33E-05 | 3.355003 |
| FABP3    | -0.59495 | 3.423731 | -4.57288 | 6.07E-06 | 4.37E-05 | 3.343848 |
| CXCL5    | 0.664112 | 1.960822 | 4.547189 | 6.83E-06 | 4.85E-05 | 3.232629 |
| PPP1R1B  | -0.74889 | 2.910064 | -4.53337 | 7.28E-06 | 5.11E-05 | 3.173044 |

|          |          |          |          |          |          |          |
|----------|----------|----------|----------|----------|----------|----------|
| LRRN4    | -0.62908 | 2.267732 | -4.51889 | 7.77E-06 | 5.41E-05 | 3.110772 |
| GJB1     | -0.71778 | 2.389376 | -4.51538 | 7.89E-06 | 5.48E-05 | 3.095727 |
| GSTA2    | -0.58598 | 1.146541 | -4.49802 | 8.54E-06 | 5.88E-05 | 3.021356 |
| ALDH1A1  | -0.62959 | 4.516309 | -4.49394 | 8.70E-06 | 5.98E-05 | 3.003898 |
| TNNT1    | 0.731735 | 2.390884 | 4.48307  | 9.14E-06 | 6.23E-05 | 2.957535 |
| MAGEA6   | 0.683037 | 0.908561 | 4.459869 | 1.01E-05 | 6.81E-05 | 2.858879 |
| MUC3A    | -0.6022  | 1.78719  | -4.37421 | 1.48E-05 | 9.54E-05 | 2.498733 |
| QPCT     | 0.651933 | 3.292415 | 4.362127 | 1.57E-05 | 9.99E-05 | 2.448456 |
| MMP28    | -0.62431 | 2.481916 | -4.32412 | 1.85E-05 | 0.000116 | 2.291136 |
| WFDC2    | -0.62276 | 7.511644 | -4.31339 | 1.94E-05 | 0.000121 | 2.246957 |
| FGFBP1   | 0.632795 | 2.048329 | 4.312273 | 1.95E-05 | 0.000122 | 2.242359 |
| ADGRF1   | -0.61038 | 2.117827 | -4.29114 | 2.14E-05 | 0.000132 | 2.15567  |
| MUC21    | -0.82774 | 3.127787 | -4.27863 | 2.25E-05 | 0.000139 | 2.104521 |
| CEACAM6  | -0.79423 | 8.301433 | -4.27597 | 2.28E-05 | 0.00014  | 2.09368  |
| PCP4L1   | -0.71145 | 2.97201  | -4.25545 | 2.49E-05 | 0.000151 | 2.010136 |
| CLDN2    | -0.79183 | 2.025824 | -4.23621 | 2.71E-05 | 0.000162 | 1.932131 |
| S100A2   | 0.656408 | 3.355875 | 4.191444 | 3.28E-05 | 0.000192 | 1.751981 |
| CLDN10   | 0.615357 | 1.816579 | 4.100067 | 4.82E-05 | 0.000268 | 1.38975  |
| CXCL10   | 0.58768  | 4.234281 | 4.072932 | 5.40E-05 | 0.000296 | 1.28362  |
| TNC      | 0.610036 | 4.293037 | 4.050957 | 5.91E-05 | 0.000321 | 1.198155 |
| SNCG     | 0.61397  | 3.368975 | 3.959171 | 8.61E-05 | 0.000447 | 0.845858 |
| C20orf85 | -0.65195 | 1.828936 | -3.87089 | 0.000123 | 0.000607 | 0.514158 |
| PRAME    | 0.624869 | 1.616681 | 3.857058 | 0.00013  | 0.000636 | 0.462835 |
| AQP5     | -0.86706 | 3.235528 | -3.85314 | 0.000132 | 0.000645 | 0.448345 |
| UCHL1    | 0.717958 | 3.391937 | 3.798424 | 0.000164 | 0.000775 | 0.24716  |
| TFF1     | 0.930404 | 2.250193 | 3.645478 | 0.000295 | 0.001298 | -0.30074 |
| CTSE     | -0.80043 | 5.044177 | -3.58259 | 0.000374 | 0.001593 | -0.51984 |
| TCN1     | 0.694402 | 1.811844 | 3.536152 | 0.000444 | 0.001848 | -0.67929 |
| IL37     | -0.61635 | 1.666167 | -3.47457 | 0.000556 | 0.002241 | -0.88772 |
| GFRA3    | -0.59908 | 2.194553 | -3.45545 | 0.000596 | 0.002381 | -0.95169 |
| SLPI     | -0.62972 | 8.026117 | -3.39791 | 0.000733 | 0.002853 | -1.14229 |
| BARX1    | 0.604154 | 1.608971 | 3.357815 | 0.000846 | 0.003228 | -1.27326 |
| GSTA1    | -0.6386  | 2.915065 | -3.35615 | 0.000851 | 0.003245 | -1.27867 |
| FGA      | 0.86359  | 2.823366 | 3.28934  | 0.001075 | 0.003963 | -1.49353 |
| FGB      | 0.876382 | 2.19619  | 3.264155 | 0.001173 | 0.004272 | -1.57345 |
| CXCL14   | -0.66683 | 4.209872 | -3.04373 | 0.00246  | 0.008073 | -2.24777 |
| PAEP     | 0.752756 | 2.582415 | 2.984453 | 0.00298  | 0.009538 | -2.42136 |
| AKR1B10  | 0.702227 | 2.168768 | 2.913586 | 0.003733 | 0.011547 | -2.62457 |
| SPINK1   | -0.7387  | 4.294496 | -2.76845 | 0.005842 | 0.016866 | -3.02602 |
| S100P    | 0.677093 | 5.347798 | 2.614378 | 0.009209 | 0.024865 | -3.43041 |
| BPIFA1   | 0.785628 | 4.112323 | 2.476388 | 0.013602 | 0.03443  | -3.77346 |







Supplementary Table 11. KEGG analysis results for risk score-related DEGs

| ID       | Description                                          | GeneRatio | BgRatio  | pvalue      | p.adjust    | qvalue      | geneID                                                                                                               |
|----------|------------------------------------------------------|-----------|----------|-------------|-------------|-------------|----------------------------------------------------------------------------------------------------------------------|
| hsa04974 | Protein digestion and absorption                     | 17/252    | 103/8104 | 1.46E-08    | 3.63E-06    | 2.98E-06    | COL11A1/COL4A3/COL5A2/COL12A1/COL4A4/COL3A1/COL1A2/COL1A1/COL7A1/KCNK5/COL5A1/COL15A1/COL9A2/ELN/CPB2/CPA3/DPP4      |
| hsa04512 | ECM-receptor interaction                             | 13/252    | 88/8104  | 2.80E-06    | 0.000275392 | 0.000225855 | HMMR/ITGA5/COL4A3/ITGA9/COL4A4/THBS2/LAMC2/COL1A2/COL1A1/ITGA11/COL9A2/SPP1/TNC                                      |
| hsa05310 | Asthma                                               | 8/252     | 31/8104  | 3.32E-06    | 0.000275392 | 0.000225855 | HLA-DMA/FCER1A/HLA-DPB1/HLA-DPA1/HLA-DOA/HLA-DQB1/HLA-DRB5/HLA-DRB1                                                  |
| hsa04940 | Type I diabetes mellitus                             | 9/252     | 43/8104  | 5.27E-06    | 0.000327844 | 0.000268873 | HLA-DMA/HLA-DPB1/GZMB/CPE/HLA-DPA1/HLA-DOA/HLA-DQB1/HLA-DRB5/HLA-DRB1                                                |
| hsa05330 | Allograft rejection                                  | 8/252     | 38/8104  | 1.70E-05    | 0.000848082 | 0.000695532 | HLA-DMA/HLA-DPB1/GZMB/HLA-DPA1/HLA-DOA/HLA-DQB1/HLA-DRB5/HLA-DRB1                                                    |
| hsa05323 | Rheumatoid arthritis                                 | 12/252    | 93/8104  | 2.80E-05    | 0.001006154 | 0.00082517  | CXCL8/HLA-DMA/MMP1/TLR2/HLA-DPB1/CCL20/HLA-DPA1/HLA-DOA/HLA-DQB1/HLA-DRB5/HLA-DRB1/CXCL5                             |
| hsa04110 | Cell cycle                                           | 14/252    | 124/8104 | 2.83E-05    | 0.001006154 | 0.00082517  | CCNB1/BUB1B/CCNB2/MAD2L1/CCNA2/CDC6/PLK1/CDC20/BUB1/CDC45/CDK1/PTTG1/MCM4/CCNE1                                      |
| hsa05332 | Graft-versus-host disease                            | 8/252     | 42/8104  | 3.69E-05    | 0.001148657 | 0.00094204  | HLA-DMA/HLA-DPB1/GZMB/HLA-DPA1/HLA-DOA/HLA-DQB1/HLA-DRB5/HLA-DRB1                                                    |
| hsa04672 | Intestinal immune network for IgA production         | 8/252     | 49/8104  | 0.000116819 | 0.003231991 | 0.002650629 | PIGR/HLA-DMA/HLA-DPB1/HLA-DPA1/HLA-DOA/HLA-DQB1/HLA-DRB5/HLA-DRB1                                                    |
| hsa05320 | Autoimmune thyroid disease                           | 8/252     | 53/8104  | 0.000206218 | 0.005134837 | 0.004211196 | HLA-DMA/HLA-DPB1/GZMB/HLA-DPA1/HLA-DOA/HLA-DQB1/HLA-DRB5/HLA-DRB1                                                    |
| hsa04640 | Hematopoietic cell lineage                           | 11/252    | 99/8104  | 0.000236804 | 0.005360392 | 0.004396179 | IL6R/ITGA5/CD1C/HLA-DMA/HLA-DPB1/HLA-DPA1/HLA-DOA/HLA-DQB1/HLA-DRB5/HLA-DRB1/CD1A                                    |
| hsa04145 | Phagosome                                            | 14/252    | 152/8104 | 0.00026041  | 0.005403501 | 0.004431534 | ITGA5/TUBB3/SFTPD/THBS2/HLA-DMA/TLR2/HLA-DPB1/SFTPA1/HLA-DPA1/SFTPA2/HLA-DOA/HLA-DQB1/HLA-DRB5/HLA-DRB1              |
| hsa04610 | Complement and coagulation cascades                  | 10/252    | 85/8104  | 0.000284235 | 0.005444199 | 0.00446491  | SERPINE1/C7/PLAUR/PLAU/C4BPA/A2M/CPB2/CLU/FGA/FGB                                                                    |
| hsa04115 | p53 signaling pathway                                | 9/252     | 73/8104  | 0.000401955 | 0.007149061 | 0.005863106 | CCNB1/RRM2/CCNB2/CDK1/SERPINE1/PMAIP1/CCNE1/IGFBP3/SERPIN5                                                           |
| hsa05321 | Inflammatory bowel disease                           | 8/252     | 65/8104  | 0.000851735 | 0.014138794 | 0.011595545 | HLA-DMA/TLR2/HLA-DPB1/HLA-DPA1/HLA-DOA/HLA-DQB1/HLA-DRB5/HLA-DRB1                                                    |
| hsa00010 | Glycolysis / Gluconeogenesis                         | 8/252     | 67/8104  | 0.001043397 | 0.016237866 | 0.013317041 | LDHA/GAPDH/ACSS1/PGK1/ADH1B/FBP1/PFKP/ALDH2                                                                          |
| hsa05146 | Amoebiasis                                           | 10/252    | 102/8104 | 0.001219207 | 0.017745371 | 0.01455338  | COL4A3/CD1C/CXCL8/COL4A4/LAMC2/COL3A1/COL1A2/COL1A1/TLR2/CD1A                                                        |
| hsa05166 | Human T-cell leukemia virus 1 infection              | 16/252    | 219/8104 | 0.001282798 | 0.017745371 | 0.01455338  | SLC2A1/BUB1B/CCNB2/MAD2L1/CCNA2/CDC20/FOSL1/PTTG1/CCNE1/HLA-DMA/HLA-DPB1/HLA-DPA1/HLA-DOA/HLA-DQB1/HLA-DRB5/HLA-DRB1 |
| hsa04514 | Cell adhesion molecules                              | 12/252    | 149/8104 | 0.002286845 | 0.029187459 | 0.023937295 | ITGA9/CLDN18/VCAN/HLA-DMA/HLA-DPB1/HLA-DPA1/HLA-DOA/HLA-DQB1/HLA-DRB5/HLA-DRB1/CLDN2/CLDN10                          |
| hsa05416 | Viral myocarditis                                    | 7/252     | 60/8104  | 0.002446983 | 0.029187459 | 0.023937295 | HLA-DMA/HLA-DPB1/HLA-DPA1/HLA-DOA/HLA-DQB1/HLA-DRB5/HLA-DRB1                                                         |
| hsa04657 | IL-17 signaling pathway                              | 9/252     | 94/8104  | 0.002501728 | 0.029187459 | 0.023937295 | FOSL1/CXCL8/MMP1/CCL20/S100A9/MMP9/S100A8/CXCL5/CXCL10                                                               |
| hsa05140 | Leishmaniasis                                        | 8/252     | 77/8104  | 0.002578812 | 0.029187459 | 0.023937295 | HLA-DMA/TLR2/HLA-DPB1/HLA-DPA1/HLA-DOA/HLA-DQB1/HLA-DRB5/HLA-DRB1                                                    |
| hsa05150 | Staphylococcus aureus infection                      | 9/252     | 96/8104  | 0.002890062 | 0.031288058 | 0.025660043 | KRT16/HLA-DMA/HLA-DPB1/HLA-DPA1/HLA-DOA/KRT17/HLA-DQB1/HLA-DRB5/HLA-DRB1                                             |
| hsa04933 | AGE-RAGE signaling pathway in diabetic complications | 9/252     | 100/8104 | 0.003808975 | 0.039162093 | 0.032117718 | VEGFD/SERPINE1/COL4A3/AGER/CXCL8/COL4A4/COL3A1/COL1A2/COL1A1                                                         |
| hsa04510 | Focal adhesion                                       | 14/252    | 201/8104 | 0.003931937 | 0.039162093 | 0.032117718 | VEGFD/RASGRF1/ITGA5/COL4A3/ITGA9/COL4A4/THBS2/LAMC2/COL1A2/COL1A1/ITGA11/COL9A2/SPP1/TNC                             |
